# Supplementary material for: Hierarchical sequence-affinity landscapes shape the evolution of breadth in an anti-influenza receptor binding site antibody
Source: eLife. 2023 Jan 10;12:e83628. doi: 10.7554/eLife.83628 (PMC9995116; doi:10.7554/eLife.83628)
Supplement: Figure 1—source data 1. — Biological duplicates, mean, and standard error are reported. [file elife-83628-fig1-data1.xlsx]

## Sheet: KD
geno	MA90_rep1	MA90_rep2	MA90_mean	MA90_sem	SI06_rep1	SI06_rep2	SI06_mean	SI06_sem	G189E_rep1	G189E_rep2	G189E_mean	G189E_sem
0000000000000000	8.61272	8.49083	8.55177	0.0609477	6	6	6	0	6	6	6	0
0000000000000001	8.63198	8.53338	8.58268	0.0492982	6	6	6	0	6	6	6	0
0000000000000010	8.34025	8.30561	8.32293	0.0173166	6	6	6	0	6	6	6	0
0000000000000011	8.51118	8.45433	8.48276	0.0284265	6	6	6	0	6	6	6	0
0000000000000100	8.55206	8.5461	8.54908	0.00297969	6	6	6	0	6	6	6	0
0000000000000101	8.55789	8.52815	8.54302	0.0148689	6	6	6	0	6	6	6	0
0000000000000110	8.26436	8.40436	8.33436	0.0700021	6	6	6	0	6	6	6	0
0000000000000111	8.55328	8.64466	8.59897	0.0456894	6	6	6	0	6	6	6	0
0000000000001000	8.61981	8.52864	8.57422	0.0455869	6	6	6	0	6	6	6	0
0000000000001001	8.6269	8.47154	8.54922	0.0776809	6	6	6	0	6	6	6	0
0000000000001010	8.46854	8.40817	8.43836	0.0301858	6	6	6	0	6	6	6	0
0000000000001011	8.54322	8.59793	8.57058	0.0273516	6	6	6	0	6	6	6	0
0000000000001100	8.62226	8.59884	8.61055	0.0117107	6	6	6	0	6	6	6	0
0000000000001101	8.52559	8.51074	8.51816	0.0074272	6	6	6	0	6	6	6	0
0000000000001110	8.52148	8.40504	8.46326	0.0582194	6	6	6	0	6	6	6	0
0000000000001111	8.53095	8.5129	8.52193	0.00902494	6	6	6	0	6	6	6	0
0000000000010000	8.49827	8.53769	8.51798	0.0197086	6	6	6	0	6	6	6	0
0000000000010001	8.5728	8.5436	8.5582	0.0145963	6	6	6	0	6	6	6	0
0000000000010010	8.36758	8.18417	8.27588	0.0917012	6	6	6	0	6	6	6	0
0000000000010011	8.50185	8.47396	8.48791	0.0139425	6	6	6	0	6	6	6	0
0000000000010100	8.51556	8.46024	8.4879	0.0276557	6	6	6	0	6	6	6	0
0000000000010101	8.51188	8.46317	8.48753	0.0243537	6	6	6	0	6	6	6	0
0000000000010110	8.24605	8.35292	8.29949	0.053434	6	6	6	0	6	6	6	0
0000000000010111	8.48998	8.43704	8.46351	0.0264702	6	6	6	0	6	6	6	0
0000000000011000	8.59781	8.4948	8.5463	0.0515021	6	6	6	0	6	6	6	0
0000000000011001	8.66391	8.513	8.58846	0.0754525	6	6	6	0	6	6	6	0
0000000000011010	8.42422	8.27984	8.35203	0.0721877	6	6	6	0	6	6	6	0
0000000000011011	8.50934	8.41641	8.46288	0.0464623	6	6	6	0	6	6	6	0
0000000000011100	8.53599	8.41651	8.47625	0.059739	6	6	6	0	6	6	6	0
0000000000011101	8.5729	8.56573	8.56932	0.0035843	6	6	6	0	6	6	6	0
0000000000011110	8.43445	8.34943	8.39194	0.0425115	6	6	6	0	6	6	6	0
0000000000011111	8.50093	8.55118	8.52606	0.0251239	6	6	6	0	6	6	6	0
0000000000100000	8.95093	8.93191	8.94142	0.0095092	6	6	6	0	7.55113	7.29649	7.42381	0.127317
0000000000100001	9.0011	8.96804	8.98457	0.0165271	6	6	6	0	7.56837	7.62104	7.5947	0.0263371
0000000000100010	8.88431	8.84711	8.86571	0.0186026	6	6	6	0	7.59238	7.22112	7.40675	0.185627
0000000000100011	9.05386	9.06392	9.05889	0.0050269		6	6	0	7.52648	7.76695	7.64672	0.120233
0000000000100100	8.99348	8.95683	8.97516	0.0183251	6	6	6	0	6.79827	7.58925	7.19376	0.395489
0000000000100101	9.04847	9.06492	9.05669	0.00822606	6	6	6	0	7.6223	8.05438	7.83834	0.216038
0000000000100110	8.8636	8.8992	8.8814	0.0177977	6	6	6	0
0000000000100111	9.02466	8.96821	8.99643	0.0282254	6	6	6	0	7.2762	7.77303	7.52461	0.248417
0000000000101000	8.95752	8.95829	8.95791	0.000385231	6	6	6	0	7.51219	7.15971	7.33595	0.176241
0000000000101001	9.02024	9.04281	9.03152	0.0112828	6	6	6	0	8.12213	7.54839	7.83526	0.286868
0000000000101010	8.91386	8.89907	8.90647	0.00739195	6	6	6	0	7.38151	7.80406	7.59278	0.211277
0000000000101011	9.04718	9.13256	9.08987	0.04269	6	6	6	0	7.75137	7.88635	7.81886	0.0674902
0000000000101100	8.98464	9.04294	9.01379	0.0291534	6	6	6	0	7.44472	7.45412	7.44942	0.00470104
0000000000101101	9.01231	9.12239	9.06735	0.0550393	6	6	6	0	7.95885	8.11026	8.03455	0.075704
0000000000101110	8.91745	8.88193	8.89969	0.0177617	6	6	6	0	7.1672	7.39818	7.28269	0.115488
0000000000101111	9.11974	9.03325	9.0765	0.0432482	6.19887	6.28444	6.24165	0.0427824	8.16917	7.78303	7.9761	0.193069
0000000000110000	8.93829	8.94746	8.94288	0.00458755	6	6	6	0	7.20466	7.69596	7.45031	0.245647
0000000000110001	9.07461	9.06434	9.06948	0.00513449	6	6.10121	6.05061	0.0506052	7.47026	7.58334	7.5268	0.0565432
0000000000110010	8.87464	8.86361	8.86912	0.00551223	6	6	6	0	7.62746	7.64662	7.63704	0.00957967
0000000000110011	9.06815	9.1872	9.12768	0.0595246	6	6	6	0	7.46885	7.55454	7.5117	0.0428449
0000000000110100	9.09107	9.0489	9.06998	0.0210809	6	6	6	0	7.52272	7.60702	7.56487	0.0421517
0000000000110101	8.98697	9.03491	9.01094	0.0239706	6	6	6	0	7.46241	7.7131	7.58776	0.125344
0000000000110110	8.81773	8.82471	8.82122	0.00349061	6	6	6	0	7.14216	7.209	7.17558	0.0334198
0000000000110111	9.06741	9.06797	9.06769	0.000282107	6	6	6	0	7.74851	7.74312	7.74581	0.0026926
0000000000111000	9.01146	9.06025	9.03585	0.0243959	6	6	6	0	7.08644	7.47339	7.27991	0.193475
0000000000111001	9.0828	8.99531	9.03906	0.0437467	6	6	6	0	7.5359	7.53719	7.53654	0.00064589
0000000000111010	8.89908	8.92063	8.90985	0.0107748	6	6	6	0	7.33042	7.56927	7.44985	0.119423
0000000000111011	9.11656	9.12773	9.12214	0.0055852	6	6.72491	6.36246	0.362457	7.76695	8.02582	7.89639	0.129436
0000000000111100	9.02035	9.0296	9.02498	0.00462875	6	6	6	0	7.27467	7.5521	7.41339	0.138712
0000000000111101	9.05016	9.01056	9.03036	0.0197999	6	6	6	0	7.70369	7.66901	7.68635	0.017342
0000000000111110	8.88559	8.93799	8.91179	0.026203	6	6	6	0	7.94657	7.84063	7.8936	0.0529689
0000000000111111	9.12951	9.07119	9.10035	0.0291594	6	6	6	0	7.41862	7.72507	7.57184	0.153226
0000000001000000	8.74981	8.65479	8.7023	0.047507	6	6	6	0	6	6	6	0
0000000001000001	8.74145	8.59448	8.66796	0.0734845	6	6	6	0	6	6	6	0
0000000001000010	8.606	8.50043	8.55321	0.0527835	6	6	6	0	6	6	6	0
0000000001000011	8.69177	8.64841	8.67009	0.0216817	6	6	6	0	6	6	6	0
0000000001000100	8.74811	8.65667	8.70239	0.0457188	6	6	6	0	6	6	6	0
0000000001000101	8.74493	8.62021	8.68257	0.0623618	6	6	6	0	6	6	6	0
0000000001000110	8.60118	8.56524	8.58321	0.0179736	6	6	6	0	6	6	6	0
0000000001000111	8.69387	8.64037	8.66712	0.0267528	6	6	6	0	6	6	6	0
0000000001001000	8.67697	8.64671	8.66184	0.015129	6	6	6	0	6	6	6	0
0000000001001001	8.75313	8.75806	8.7556	0.00246761	6	6	6	0	6	6	6	0
0000000001001010	8.70849	8.61512	8.66181	0.046682	6	6	6	0	6	6	6	0
0000000001001011	8.7295	8.65392	8.69171	0.0377876	6	6	6	0	6	6	6	0
0000000001001100	8.75634	8.63152	8.69393	0.0624144	6	6	6	0	6	6	6	0
0000000001001101	8.75705	8.73134	8.74419	0.0128553	6	6	6	0	6	6	6	0
0000000001001110	8.63301	8.62499	8.629	0.00400864	6	6	6	0	6	6	6	0
0000000001001111	8.72525	8.70967	8.71746	0.00778666	6	6	6	0	6	6	6	0
0000000001010000	8.63397	8.59184	8.6129	0.0210624	6	6	6	0	6	6	6	0
0000000001010001	8.74369	8.60699	8.67534	0.0683492	6	6	6	0	6	6	6	0
0000000001010010	8.5515	8.49564	8.52357	0.027931	6	6	6	0	6	6	6	0
0000000001010011	8.63991	8.58153	8.61072	0.0291907	6	6	6	0	6	6	6	0
0000000001010100	8.78933	8.66437	8.72685	0.0624836	6	6	6	0	6	6	6	0
0000000001010101	8.68423	8.62873	8.65648	0.027748	6	6	6	0	6	6	6	0
0000000001010110	8.56829	8.48565	8.52697	0.041321	6	6	6	0	6	6	6	0
0000000001010111	8.63094	8.7031	8.66702	0.0360803	6	6	6	0	6	6	6	0
0000000001011000	8.77286	8.6889	8.73088	0.0419825	6	6	6	0	6	6	6	0
0000000001011001	8.74199	8.72243	8.73221	0.00978131	6	6	6	0	6	6	6	0
0000000001011010	8.57522	8.598	8.58661	0.0113912	6	6	6	0	6	6	6	0
0000000001011011	8.69131	8.62425	8.65778	0.0335279	6	6	6	0	6	6	6	0
0000000001011100	8.73898	8.66531	8.70214	0.0368328	6	6	6	0	6	6	6	0
0000000001011101	8.73204	8.66653	8.69928	0.0327555	6	6	6	0	6	6	6	0
0000000001011110	8.63053	8.53153	8.58103	0.0494988	6	6	6	0	6	6	6	0
0000000001011111	8.72304	8.72735	8.72519	0.00215801	6	6	6	0	6	6	6	0
0000000001100000	9.1237	9.1566	9.14015	0.0164485	6	6	6	0	7.99441	7.87327	7.93384	0.06057
0000000001100001	9.13378	9.15013	9.14195	0.00817266	6	6	6	0	8.16521	8.14077	8.15299	0.0122216
0000000001100010	9.01204	8.9261	8.96907	0.0429712	6	6	6	0	7.75569	7.91747	7.83658	0.080889
0000000001100011	9.22072	9.20623	9.21348	0.00724801	6.30569	6.51064	6.40816	0.102476	8.27703	8.51193	8.39448	0.117452
0000000001100100	9.12688	9.07721	9.10204	0.024836	6	6	6	0	8.10754	7.87135	7.98945	0.118095
0000000001100101	9.15051	9.1131	9.1318	0.0187057	6	6	6	0	8.06172	8.21079	8.13625	0.0745363
0000000001100110	9.01572	8.97789	8.9968	0.0189179	6	6	6	0	7.78875	7.72191	7.75533	0.0334239
0000000001100111	9.16441	9.20679	9.1856	0.021189	6	6.6103	6.30515	0.305152	8.3425	8.4206	8.38155	0.0390529
0000000001101000	9.17526	9.13123	9.15325	0.0220161	6	6	6	0	8.50423	8.61254	8.55838	0.0541527
0000000001101001	9.13414	9.1564	9.14527	0.0111313	6	6	6	0	8.05289	8.08342	8.06815	0.0152611
0000000001101010	9.09818	9.16429	9.13123	0.0330533	6	6	6	0	8.00904	8.25828	8.13366	0.124622
0000000001101011	9.24556	9.29785	9.2717	0.0261445	7.73659	7.02826	7.38242	0.354163	8.57443	8.54346	8.55894	0.0154886
0000000001101100	9.14114	9.21053	9.17584	0.0346959	6	6	6	0	7.97714	8.54052	8.25883	0.281692
0000000001101101	9.23692	9.14685	9.19189	0.0450354	6	6	6	0	8.26255	8.09888	8.18072	0.0818371
0000000001101110	9.10291	9.0885	9.09571	0.00720346	6	6	6	0	7.45748	7.88744	7.67246	0.214979
0000000001101111	9.25347	9.23638	9.24493	0.00854602	6.48659	6.25503	6.37081	0.11578	8.42954	8.29854	8.36404	0.0655008
0000000001110000	9.16666	9.11031	9.13849	0.0281723	6	6	6	0	8.2139	8.00544	8.10967	0.104234
0000000001110001	9.19702	9.2726	9.23481	0.0377918	6.39608	6.0568	6.22644	0.169639	8.29627	8.51816	8.40721	0.110945
0000000001110010	8.97364	9.00246	8.98805	0.0144073	6	6	6	0	8.20503	8.07693	8.14098	0.0640515
0000000001110011	9.22637	9.14993	9.18815	0.038222	6	6.79684	6.39842	0.398419	8.42975	8.75695	8.59335	0.163599
0000000001110100	9.14018	9.16827	9.15423	0.0140427	6	6	6	0	8.26276	8.82677	8.54477	0.282006
0000000001110101	9.21282	9.19325	9.20304	0.00978784	6	6	6	0	8.42062	8.98849	8.70455	0.283938
0000000001110110	8.97456	9.01102	8.99279	0.0182305	6	6	6	0	8.2087	8.10775	8.15822	0.0504737
0000000001110111	9.11356	9.15991	9.13673	0.0231766	6.23888	6.78681	6.51285	0.273963	8.42274	8.47715	8.44995	0.0272081
0000000001111000	9.10032	9.12436	9.11234	0.0120236	6	6	6	0	8.38747	8.3813	8.38438	0.00308882
0000000001111001	9.18748	9.19285	9.19016	0.00268238	6	6.08029	6.04015	0.0401471	8.66689	8.76485	8.71587	0.0489816
0000000001111010	9.08482	8.99718	9.041	0.0438174	6	6	6	0	7.97429	8.03165	8.00297	0.0286818
0000000001111011	9.21181	9.17537	9.19359	0.0182165	6.40519	7.09128	6.74824	0.343041	8.50805	8.59933	8.55369	0.0456429
0000000001111100	9.18535	9.24882	9.21708	0.0317344	6	6	6	0	8.44708	8.30519	8.37613	0.0709422
0000000001111101	9.16975	9.1564	9.16308	0.00667384	6	6	6	0	8.4134	8.26748	8.34044	0.072962
0000000001111110	9.04631	9.05954	9.05292	0.0066131	6.05644	6	6.02822	0.0282178	8.0311	8.1513	8.0912	0.060102
0000000001111111	9.22571	9.19577	9.21074	0.0149734	6.13722	6	6.06861	0.0686082	8.40461	8.56642	8.48552	0.0809043
0000000010000000	8.60617	8.62989	8.61803	0.0118596	6	6	6	0	6	6	6	0
0000000010000001	8.58826	8.51146	8.54986	0.0384027	6	6	6	0	6	6	6	0
0000000010000010	8.45275	8.40774	8.43025	0.0225027	6	6	6	0	6	6	6	0
0000000010000011	8.59441	8.60132	8.59786	0.00345342	6	6	6	0	6	6	6	0
0000000010000100	8.60327	8.57785	8.59056	0.012711	6	6	6	0	6	6	6	0
0000000010000101	8.57075	8.48391	8.52733	0.0434193	6	6	6	0	6	6	6	0
0000000010000110	8.50227	8.38951	8.44589	0.056381	6	6	6	0	6	6	6	0
0000000010000111	8.58424	8.5569	8.57057	0.0136714	6	6	6	0	6	6	6	0
0000000010001000	8.64515	8.623	8.63408	0.0110766	6	6	6	0	6	6	6	0
0000000010001001	8.63388	8.57065	8.60227	0.0316182	6	6	6	0	6	6	6	0
0000000010001010	8.49937	8.53047	8.51492	0.0155514	6	6	6	0	6	6	6	0
0000000010001011	8.57953	8.63213	8.60583	0.026301	6	6	6	0	6	6	6	0
0000000010001100	8.61858	8.61137	8.61498	0.00360254	6	6	6	0	6	6	6	0
0000000010001101	8.67293	8.552	8.61247	0.060465	6	6	6	0	6	6	6	0
0000000010001110	8.55188	8.5219	8.53689	0.0149907	6	6	6	0	6	6	6	0
0000000010001111	8.64638	8.52049	8.58343	0.062945	6	6	6	0	6	6	6	0
0000000010010000	8.53572	8.55591	8.54581	0.0100938	6	6	6	0	6	6	6	0
0000000010010001	8.55361	8.61945	8.58653	0.0329224	6	6	6	0	6	6	6	0
0000000010010010	8.409	8.51044	8.45972	0.050723	6	6	6	0	6	6	6	0
0000000010010011	8.5198	8.53821	8.52901	0.00920733	6	6	6	0	6	6	6	0
0000000010010100	8.55246	8.61896	8.58571	0.0332478	6	6	6	0	6	6	6	0
0000000010010101	8.53134	8.51722	8.52428	0.0070593	6	6	6	0	6	6	6	0
0000000010010110	8.4291	8.35063	8.38986	0.039234	6	6	6	0	6	6	6	0
0000000010010111	8.57132	8.66166	8.61649	0.0451698	6	6	6	0	6	6	6	0
0000000010011000	8.48211	8.55723	8.51967	0.0375559	6	6	6	0	6	6	6	0
0000000010011001	8.64779	8.58785	8.61782	0.0299708	6	6	6	0	6	6	6	0
0000000010011010	8.49237	8.44888	8.47063	0.0217446	6	6	6	0	6	6	6	0
0000000010011011	8.68004	8.65744	8.66874	0.0113004	6	6	6	0	6	6	6	0
0000000010011100	8.51189	8.53159	8.52174	0.00984702	6	6	6	0	6	6	6	0
0000000010011101	8.60847	8.52121	8.56484	0.0436329	6	6	6	0	6	6	6	0
0000000010011110	8.45464	8.48456	8.4696	0.0149627	6	6	6	0	6	6	6	0
0000000010011111	8.60563	8.48307	8.54435	0.0612799	6	6	6	0	6	6	6	0
0000000010100000	8.93737	8.86898	8.90318	0.0341916	6	6	6	0	7.54046	7.32768	7.43407	0.106388
0000000010100001	8.98077	9.04767	9.01422	0.0334492	6	6	6	0	7.50565	7.70469	7.60517	0.0995207
0000000010100010	8.78703	8.81873	8.80288	0.0158479	6	6	6	0	7.57277	7.17279	7.37278	0.199988
0000000010100011	8.98701	9.03692	9.01197	0.0249555	6	6.23459	6.1173	0.117295	7.72592	7.70615	7.71603	0.00988826
0000000010100100	8.97641	8.8933	8.93485	0.0415575	6	6	6	0	7.44977	7.46993	7.45985	0.0100821
0000000010100101	8.91694	9.00702	8.96198	0.0450385	6	6	6	0	7.52128	7.36768	7.44448	0.0767988
0000000010100110	8.82841	8.79482	8.81162	0.0167949	6	6	6	0
0000000010100111	9.01699	9.06642	9.04171	0.0247125	6	6	6	0	7.41465	7.52651	7.47058	0.0559256
0000000010101000	8.94313	8.92006	8.9316	0.0115358	6	6	6	0	7.809	7.48771	7.64835	0.160644
0000000010101001	9.02146	9.03787	9.02967	0.00820419	6	6	6	0	7.56255	7.49251	7.52753	0.0350218
0000000010101010	8.84949	8.829	8.83925	0.0102439	6	6	6	0	7.24318	7.28688	7.26503	0.0218507
0000000010101011	9.04095	9.03798	9.03946	0.00148475	6	6.03436	6.01718	0.0171819	7.60903	7.60957	7.6093	0.000271622
0000000010101100	8.95796	9.00708	8.98252	0.0245626	6	6	6	0	7.06091	7.36417	7.21254	0.151629
0000000010101101	9.00042	8.97708	8.98875	0.0116689	6	6	6	0	7.4108	7.4029	7.40685	0.00395318
0000000010101110	8.87055	8.88363	8.87709	0.00653726	6	6	6	0	7.18472	7.18862	7.18667	0.00194865
0000000010101111	9.04147	9.14354	9.0925	0.0510341	6	6	6	0	7.47311	7.95722	7.71516	0.242052
0000000010110000	8.96661	8.94714	8.95688	0.00973318	6	6	6	0	7.37485	7.31997	7.34741	0.0274425
0000000010110001	9.03914	9.0694	9.05427	0.015133	6	6.18409	6.09204	0.0920427	7.68561	7.67118	7.6784	0.00721396
0000000010110010	8.79572	8.83553	8.81562	0.0199044	6	6	6	0	6.7951	7.3372	7.06615	0.271046
0000000010110011	9.01069	9.07178	9.04124	0.0305417					7.85264	7.83816	7.8454	0.00723936
0000000010110100	8.95538	9.04141	8.99839	0.043016	6	6	6	0	7.45346	7.81126	7.63236	0.178901
0000000010110101	9.05267	9.05637	9.05452	0.00184612	6.15812	6.56647	6.36229	0.204178	7.57026	8.0875	7.82888	0.258621
0000000010110110	8.88519	8.84618	8.86569	0.0195024	6	6	6	0	7.5732	7.21601	7.39461	0.178596
0000000010110111	9.05193	8.96189	9.00691	0.0450203	6.5027		6.5027	0	8.04079	7.86459	7.95269	0.0880991
0000000010111000	8.9784	8.93697	8.95768	0.0207165	6	6	6	0	7.57732	7.53506	7.55619	0.0211279
0000000010111001	9.06909	9.0705	9.06979	0.000708594	6	6	6	0	7.85301	7.97296	7.91298	0.0599746
0000000010111010	8.87883	8.91956	8.8992	0.020364	6	6	6	0	7.43645	7.642	7.53922	0.102777
0000000010111011	9.12308	9.1159	9.11949	0.0035919					8.0872	7.79647	7.94183	0.145361
0000000010111100	8.99268	8.97611	8.98439	0.00828623	6		6	0	7.3084	7.27299	7.2907	0.0177029
0000000010111101	9.1018	9.02064	9.06122	0.0405802	6	6	6	0	7.49693	7.93142	7.71418	0.217244
0000000010111110	8.84422	8.85753	8.85088	0.00665556	6	6	6	0	7.70205	7.60465	7.65335	0.0487005
0000000010111111	9.08869	9.02659	9.05764	0.0310504	6	6.48644	6.24322	0.243221	7.99408	7.70613	7.8501	0.143975
0000000011000000	8.73778	8.68871	8.71325	0.0245316	6	6	6	0	6	6	6	0
0000000011000001	8.72207	8.67265	8.69736	0.0247118	6	6	6	0	6	6	6	0
0000000011000010	8.58992	8.56685	8.57839	0.0115327	6	6	6	0	6	6	6	0
0000000011000011	8.68503	8.67653	8.68078	0.00425128	6	6	6	0	6	6	6	0
0000000011000100	8.7402	8.74397	8.74209	0.00188476	6	6	6	0	6	6	6	0
0000000011000101	8.69562	8.63812	8.66687	0.0287503	6	6	6	0	6	6	6	0
0000000011000110	8.65173	8.56036	8.60604	0.0456832	6	6	6	0	6	6	6	0
0000000011000111	8.72252	8.57122	8.64687	0.0756545	6	6	6	0	6	6	6	0
0000000011001000	8.76484	8.69637	8.7306	0.0342324	6	6	6	0	6	6	6	0
0000000011001001	8.75541	8.7689	8.76216	0.00674808	6	6	6	0	6	6	6	0
0000000011001010	8.73852	8.7252	8.73186	0.00666294	6	6	6	0	6	6	6	0
0000000011001011	8.75191	8.7747	8.76331	0.0113965	6	6	6	0	6	6	6	0
0000000011001100	8.73428	8.68377	8.70902	0.025251	6	6	6	0	6	6	6	0
0000000011001101	8.84396	8.73375	8.78886	0.0551073	6	6	6	0	6	6	6	0
0000000011001110	8.70654	8.63612	8.67133	0.0352112	6	6	6	0	6	6	6	0
0000000011001111	8.6959	8.77108	8.73349	0.0375899	6	6	6	0	6	6	6	0
0000000011010000	8.71375	8.61413	8.66394	0.04981	6	6	6	0	6	6	6	0
0000000011010001	8.70543	8.73659	8.72101	0.0155795	6	6	6	0	6	6	6	0
0000000011010010	8.6295	8.5465	8.588	0.0415001	6	6	6	0	6	6	6	0
0000000011010011	8.67783	8.68371	8.68077	0.00294179	6	6	6	0	6	6	6	0
0000000011010100	8.70951	8.68557	8.69754	0.0119723	6	6	6	0	6	6	6	0
0000000011010101	8.63944	8.63185	8.63565	0.00379627	6	6	6	0	6	6	6	0
0000000011010110	8.60039	8.45268	8.52653	0.0738551	6	6	6	0	6	6	6	0
0000000011010111	8.65772	8.59501	8.62637	0.0313572	6	6	6	0	6	6	6	0
0000000011011000	8.71312	8.70413	8.70862	0.00449028	6	6	6	0	6	6	6	0
0000000011011001	8.7221	8.66394	8.69302	0.0290783	6	6	6	0	6	6	6	0
0000000011011010	8.63038	8.6217	8.62604	0.00434229	6	6	6	0	6	6	6	0
0000000011011011	8.71207	8.64146	8.67676	0.0353022	6	6	6	0	6	6	6	0
0000000011011100	8.68637	8.6634	8.67489	0.0114847	6	6	6	0	6	6	6	0
0000000011011101	8.78773	8.70865	8.74819	0.0395378	6	6	6	0	6	6	6	0
0000000011011110	8.69063	8.59253	8.64158	0.04905	6	6	6	0	6	6	6	0
0000000011011111	8.76876	8.63222	8.70049	0.0682719	6	6	6	0	6	6	6	0
0000000011100000	9.25862	9.21623	9.23743	0.0211959	6.5178	6.17755	6.34768	0.170125	8.7291	8.66773	8.69841	0.0306844
0000000011100001	9.31167	9.30551	9.30859	0.00307708					8.97492	8.7583	8.86661	0.10831
0000000011100010	9.09243	9.08637	9.0894	0.00302761	6	6	6	0	8.16649	8.28435	8.22542	0.0589301
0000000011100011	9.42697	9.34373	9.38535	0.0416203	7.19774	6.98975	7.09375	0.103995	8.91991	8.95985	8.93988	0.0199714
0000000011100100	9.27792	9.15803	9.21797	0.0599445	6.30489	6.33459	6.31974	0.0148513	8.48362	8.58118	8.5324	0.0487769
0000000011100101	9.27528	9.20968	9.24248	0.0328024	6.35255	6.21656	6.28456	0.0679967	8.66133	8.64646	8.65389	0.00743258
0000000011100110	9.09366	9.11355	9.10361	0.00994594	6	6	6	0	8.32654	8.16275	8.24464	0.0818957
0000000011100111	9.31315	9.36982	9.34149	0.0283381	7.59651	7.40207	7.49929	0.097221	8.83264	8.52891	8.68078	0.151864
0000000011101000	9.20356	9.22533	9.21444	0.0108848	6.40502	6.32398	6.3645	0.0405211	8.38819	8.27087	8.32953	0.0586605
0000000011101001	9.33604	9.22315	9.27959	0.056443		7.18774	7.18774	0	8.541	8.54455	8.54278	0.00177287
0000000011101010	9.17782	9.09581	9.13682	0.0410079	6	6.76016	6.38008	0.380079	8.24781	8.56051	8.40416	0.156353
0000000011101011	9.32631	9.23978	9.28305	0.0432668	7.57799	7.42012	7.49906	0.0789349	8.81587	9.04183	8.92885	0.112982
0000000011101100	9.19464	9.25367	9.22415	0.0295113	6	6.17245	6.08622	0.0862242	8.4729	8.48224	8.47757	0.00467196
0000000011101101	9.31661	9.26768	9.29215	0.0244653					8.81124	9.01561	8.91342	0.102184
0000000011101110	9.13263	9.15328	9.14296	0.010327	6.38694	6.39407	6.3905	0.00356476	8.45229	8.47273	8.46251	0.0102187
0000000011101111	9.36783	9.32185	9.34484	0.022988	7.73296	7.78126	7.75711	0.0241477	8.85933	8.49224	8.67578	0.183547
0000000011110000	9.16273	9.14099	9.15186	0.010871	6.21007	7.1041	6.65709	0.447014	8.81831	8.65447	8.73639	0.0819195
0000000011110001	9.30241	9.26984	9.28612	0.0162859	6.02419	6.63924	6.33171	0.307522	8.64353	8.7925	8.71802	0.074482
0000000011110010	9.04809	9.04944	9.04877	0.000676338					8.36426	8.10768	8.23597	0.128291
0000000011110011	9.39023	9.29507	9.34265	0.0475806	7.01516	6.9327	6.97393	0.0412307	8.86562	8.96002	8.91282	0.0472013
0000000011110100	9.26881	9.21891	9.24386	0.0249518	6	6.47096	6.23548	0.235478	8.80959	8.6376	8.7236	0.0859953
0000000011110101	9.31809	9.33986	9.32897	0.0108856	6.65957	6.96965	6.81461	0.155042	8.66942	8.81691	8.74316	0.0737463
0000000011110110	9.03494	9.03689	9.03591	0.000978936	6	6.47796	6.23898	0.238981	8.40235	8.26436	8.33335	0.0689975
0000000011110111	9.35496	9.38524	9.3701	0.0151391	6.3522	6.74147	6.54683	0.194636	8.84376	8.91882	8.88129	0.0375321
0000000011111000	9.19223	9.20483	9.19853	0.00630028	6	6	6	0	8.4567	8.61298	8.53484	0.0781408
0000000011111001	9.39682	9.25949	9.32815	0.0686651		7.07557	7.07557	0	8.78098	8.9033	8.84214	0.0611619
0000000011111010	9.13311	9.08445	9.10878	0.0243309					8.33813	8.17197	8.25505	0.0830795
0000000011111011	9.3281	9.40523	9.36666	0.0385643	7.31455	7.09012	7.20233	0.112216	8.6924	9.02851	8.86046	0.168053
0000000011111100	9.32879	9.28796	9.30838	0.0204128	6.16827	6.55242	6.36035	0.192074	8.55819	8.74301	8.6506	0.0924114
0000000011111101	9.35832	9.43719	9.39776	0.0394348	6.3556	7.00406	6.67983	0.324232	8.83153	8.78389	8.80771	0.0238173
0000000011111110	9.12334	9.0332	9.07827	0.045072	6.33631	6	6.16816	0.168156	8.26991	8.34838	8.30914	0.0392355
0000000011111111	9.37958	9.36053	9.37005	0.00952225	6.92166	7.27916	7.10041	0.178749	8.85536	8.80772	8.83154	0.0238194
0000000100000000	8.74195	8.79897	8.77046	0.0285092	6	6	6	0	6	6	6	0
0000000100000001	8.79248	8.78364	8.78806	0.00442044	6	6	6	0	6	6	6	0
0000000100000010	8.62819	8.61321	8.6207	0.00748925	6	6	6	0	6	6	6	0
0000000100000011	8.802	8.77707	8.78954	0.0124652	6	6	6	0	6	6	6	0
0000000100000100	8.76854	8.77886	8.7737	0.00516053	6	6	6	0	6	6	6	0
0000000100000101	8.73338	8.79645	8.76492	0.0315336	6	6	6	0	6	6	6	0
0000000100000110	8.62843	8.50735	8.56789	0.0605406	6	6	6	0	6	6	6	0
0000000100000111	8.74678	8.61392	8.68035	0.0664319	6	6	6	0	6	6	6	0
0000000100001000	8.82337	8.79849	8.81093	0.0124405	6	6	6	0	6	6	6	0
0000000100001001	8.79225	8.78311	8.78768	0.00456872	6	6	6	0	6	6	6	0
0000000100001010	8.72107	8.70053	8.7108	0.0102713	6	6	6	0	6	6	6	0
0000000100001011	8.76089	8.8061	8.7835	0.0226019	6	6	6	0	6	6	6	0
0000000100001100	8.79333	8.76723	8.78028	0.0130491	6	6	6	0	6	6	6	0
0000000100001101	8.89525	8.80636	8.8508	0.0444451	6	6	6	0	6	6	6	0
0000000100001110	8.75139	8.69271	8.72205	0.0293366	6	6	6	0	6	6	6	0
0000000100001111	8.70613	8.77123	8.73868	0.0325478	6	6	6	0	6	6	6	0
0000000100010000	8.60454	8.73032	8.66743	0.0628887	6	6	6	0	6	6	6	0
0000000100010001	8.68795	8.68755	8.68775	0.000200218	6	6	6	0	6	6	6	0
0000000100010010	8.59369	8.56432	8.57901	0.0146852	6	6	6	0	6	6	6	0
0000000100010011	8.708	8.67637	8.69219	0.0158112	6	6	6	0	6	6	6	0
0000000100010100	8.7193	8.68959	8.70445	0.0148574	6	6	6	0	6	6	6	0
0000000100010101	8.66126	8.75845	8.70985	0.048599	6	6	6	0	6	6	6	0
0000000100010110	8.55726	8.56499	8.56112	0.00386808	6	6	6	0	6	6	6	0
0000000100010111	8.65557	8.70066	8.67812	0.0225405	6	6	6	0	6	6	6	0
0000000100011000	8.74804	8.68274	8.71539	0.0326509	6	6	6	0	6	6	6	0
0000000100011001	8.81993	8.82504	8.82249	0.00255328	6	6	6	0	6	6	6	0
0000000100011010	8.59467	8.666	8.63033	0.035665	6	6	6	0	6	6	6	0
0000000100011011	8.71783	8.74786	8.73284	0.0150135	6	6	6	0	6	6	6	0
0000000100011100	8.65195	8.63357	8.64276	0.00919266	6	6	6	0	6	6	6	0
0000000100011101	8.75638	8.66822	8.7123	0.0440795	6	6	6	0	6	6	6	0
0000000100011110	8.60929	8.71194	8.66061	0.0513245	6	6	6	0	6	6	6	0
0000000100011111	8.73704	8.82107	8.77906	0.0420161	6	6	6	0	6	6	6	0
0000000100100000	9.30627	9.23555	9.27091	0.0353575	6	6.43156	6.21578	0.215779	8.48094	8.31328	8.39711	0.0838306
0000000100100001	9.34679	9.31284	9.32982	0.0169746	6	6.61411	6.30705	0.307054	8.15995	8.48727	8.32361	0.163664
0000000100100010	9.23909	9.19903	9.21906	0.0200315	6	6.30945	6.15473	0.154727	8.09372	8.19328	8.1435	0.0497809
0000000100100011	9.33788	9.33783	9.33786	2.85409e-05	7.1022	7.31066	7.20643	0.104233	8.66755	8.61384	8.6407	0.0268543
0000000100100100	9.38542	9.30902	9.34722	0.0382012	6	6	6	0	8.29353	8.33713	8.31533	0.0217991
0000000100100101	9.3546	9.4539	9.40425	0.0496487	6.3683	7.35179	6.86005	0.491745	8.58925	8.45784	8.52355	0.0657046
0000000100100110	9.19634	9.1409	9.16862	0.0277212	6	6	6	0	7.73678	8.15759	7.94718	0.210404
0000000100100111	9.35048	9.49617	9.42332	0.0728418	6.46609	6.86671	6.6664	0.200311	8.65789	8.77748	8.71768	0.059797
0000000100101000	9.25658	9.19716	9.22687	0.0297106	6	6.34228	6.17114	0.171141	7.78872	8.17683	7.98277	0.194055
0000000100101001	9.29565	9.3703	9.33298	0.0373257	6.57147	7.37789	6.97468	0.403208	8.37783	8.37945	8.37864	0.000807938
0000000100101010	9.23678	9.22988	9.23333	0.00345301	6.28555	6	6.14277	0.142774	7.86656	8.00493	7.93574	0.0691853
0000000100101011	9.38928	9.5465	9.46789	0.0786128	6.92758	7.30588	7.11673	0.189147	8.79082	8.45105	8.62093	0.16989
0000000100101100	9.32385	9.28782	9.30584	0.0180129	6.80845	6.36367	6.58606	0.22239	8.28078	8.14399	8.21239	0.0683915
0000000100101101	9.38639	9.32117	9.35378	0.0326096	6	6.18925	6.09462	0.0946231	8.24933	8.60921	8.42927	0.179938
0000000100101110	9.16186	9.16353	9.16269	0.000834244	6.43738	6.62169	6.52953	0.0921582	8.07646	8.09225	8.08436	0.00789474
0000000100101111	9.41388	9.4996	9.45674	0.0428601	6.89031	7.36706	7.12868	0.238379	8.35947	8.60763	8.48355	0.124084
0000000100110000	9.31475	9.30646	9.31061	0.00414271	6	6.09703	6.04852	0.0485153	8.62558	8.359	8.49229	0.133289
0000000100110001	9.28061	9.36769	9.32415	0.0435406	6	6.65188	6.32594	0.325941	8.47627	8.62044	8.54835	0.0720849
0000000100110010	9.11157	9.10402	9.10779	0.00377362	6	6.19362	6.09681	0.0968097	8.16727	8.22825	8.19776	0.0304929
0000000100110011	9.42554	9.42538	9.42546	7.76574e-05	6.67167	7.26787	6.96977	0.2981	8.79781	8.68108	8.73945	0.0583666
0000000100110100	9.26735	9.28233	9.27484	0.00749009	6.39729	6.21545	6.30637	0.0909166	8.44828	8.39241	8.42034	0.0279332
0000000100110101	9.31699	9.2491	9.28304	0.033947	6	6	6	0	8.59547	8.48803	8.54175	0.0537196
0000000100110110	9.18866	9.0597	9.12418	0.0644801	6.10397	6	6.05199	0.0519858	8.16057	8.0435	8.10204	0.0585363
0000000100110111	9.39217	9.41566	9.40391	0.0117452					8.72619	8.71701	8.7216	0.00459331
0000000100111000	9.38101	9.32662	9.35382	0.0271985	6	6.42524	6.21262	0.212622	8.59893	8.39259	8.49576	0.103168
0000000100111001	9.40549	9.37381	9.38965	0.0158383	7.28886	6.78643	7.03764	0.251216	8.33399	8.48833	8.41116	0.0771693
0000000100111010	9.25534	9.22276	9.23905	0.0162894	6	6.21873	6.10937	0.109367	8.3638	7.8946	8.1292	0.234599
0000000100111011	9.48884	9.3031	9.39597	0.0928708	6	6.84696	6.42348	0.423479	8.93222	8.55625	8.74423	0.187985
0000000100111100	9.4732	9.31228	9.39274	0.0804587	6.29011	6.80881	6.54946	0.259351	8.34346	8.24425	8.29385	0.0496078
0000000100111101	9.47377	9.5058	9.48979	0.0160174	6.58031	7.23051	6.90541	0.325103	8.56186	8.80441	8.68314	0.121273
0000000100111110	9.20622	9.18552	9.19587	0.010355	6.25803	6.14487	6.20145	0.0565778	8.1192	8.38065	8.24992	0.130721
0000000100111111	9.44884	9.5267	9.48777	0.038928	7.16612	6.73303	6.94957	0.216545	8.77784	8.62081	8.69933	0.0785123
0000000110000000	8.76591	8.80668	8.7863	0.0203833	6	6	6	0	6	6	6	0
0000000110000001	8.82931	8.75309	8.7912	0.0381083	6	6	6	0	6	6	6	0
0000000110000010	8.63699	8.64909	8.64304	0.0060501	6	6	6	0	6	6	6	0
0000000110000011	8.78925	8.76399	8.77662	0.0126309	6	6	6	0	6	6	6	0
0000000110000100	8.78341	8.7381	8.76076	0.0226525	6	6	6	0	6	6	6	0
0000000110000101	8.74247	8.71033	8.7264	0.0160703	6	6	6	0	6	6	6	0
0000000110000110	8.66848	8.68849	8.67848	0.0100069	6	6	6	0	6	6	6	0
0000000110000111	8.76765	8.77624	8.77194	0.004298	6	6	6	0	6	6	6	0
0000000110001000	8.82013	8.73305	8.77659	0.0435362	6	6	6	0	6	6	6	0
0000000110001001	8.80067	8.86704	8.83385	0.0331861	6	6	6	0	6	6	6	0
0000000110001010	8.70016	8.59894	8.64955	0.0506109	6	6	6	0	6	6	6	0
0000000110001011	8.81472	8.80607	8.8104	0.00432869	6	6	6	0	6	6	6	0
0000000110001100	8.85621	8.88771	8.87196	0.0157507	6	6	6	0	6	6	6	0
0000000110001101	8.77387	8.78762	8.78075	0.00687322	6	6	6	0	6	6	6	0
0000000110001110	8.73779	8.70301	8.7204	0.0173908	6	6	6	0	6	6	6	0
0000000110001111	8.75727	8.80646	8.78187	0.0245954	6	6	6	0	6	6	6	0
0000000110010000	8.76182	8.74812	8.75497	0.00685023	6	6	6	0	6	6	6	0
0000000110010001	8.77841	8.75659	8.7675	0.0109137	6	6	6	0	6	6	6	0
0000000110010010	8.58464	8.53829	8.56147	0.0231721	6	6	6	0	6	6	6	0
0000000110010011	8.75528	8.74423	8.74975	0.00552344	6	6	6	0	6	6	6	0
0000000110010100	8.69174	8.76963	8.73068	0.0389454	6	6	6	0	6	6	6	0
0000000110010101	8.67861	8.74284	8.71073	0.032115	6	6	6	0	6	6	6	0
0000000110010110	8.58529	8.53744	8.56136	0.0239252	6	6	6	0	6	6	6	0
0000000110010111	8.72463	8.72404	8.72433	0.000297777	6	6	6	0	6	6	6	0
0000000110011000	8.7405	8.75658	8.74854	0.00804045	6	6	6	0	6	6	6	0
0000000110011001	8.77749	8.71417	8.74583	0.0316629	6	6	6	0	6	6	6	0
0000000110011010	8.67375	8.6821	8.67792	0.00417159	6	6	6	0	6	6	6	0
0000000110011011	8.74792	8.79615	8.77204	0.024115	6	6	6	0	6	6	6	0
0000000110011100	8.75114	8.80051	8.77583	0.0246814	6	6	6	0	6	6	6	0
0000000110011101	8.81401	8.84718	8.83059	0.0165862	6	6	6	0	6	6	6	0
0000000110011110	8.6574	8.61442	8.63591	0.0214936	6	6	6	0	6	6	6	0
0000000110011111	8.76355	8.77817	8.77086	0.00731089	6	6	6	0	6	6	6	0
0000000110100000	9.27798	9.24568	9.26183	0.0161496	6	6	6	0	8.52284	8.46181	8.49233	0.0305139
0000000110100001	9.34363	9.29537	9.3195	0.0241293	6.33273	6.14747	6.2401	0.0926285	8.6497	8.52834	8.58902	0.0606803
0000000110100010	9.11562	9.08344	9.09953	0.0160937	6	6	6	0	8.09938	7.99326	8.04632	0.0530618
0000000110100011	9.3944	9.37681	9.38561	0.0087943	6.64608	7.05202	6.84905	0.202969	8.78824	8.82183	8.80504	0.0167975
0000000110100100	9.30136	9.33638	9.31887	0.0175111	6.18265	7.13336	6.65801	0.475359	8.6061	8.58402	8.59506	0.0110395
0000000110100101	9.31386	9.34726	9.33056	0.0166977	6	6.84495	6.42248	0.422477	8.7109	8.5891	8.65	0.0608988
0000000110100110	9.17026	9.1818	9.17603	0.00576746	6	6	6	0	8.25889	8.29682	8.27786	0.0189664
0000000110100111	9.40974	9.42825	9.41899	0.00925492	6.30084	6.17697	6.23891	0.0619381	8.70928	8.61739	8.66333	0.0459419
0000000110101000	9.24338	9.29931	9.27134	0.0279677	6.24146	6	6.12073	0.12073	8.51539	8.60221	8.5588	0.0434137
0000000110101001	9.35408	9.37033	9.36221	0.00812245	6	6	6	0	8.66667	8.3137	8.49019	0.176485
0000000110101010	9.22531	9.18219	9.20375	0.0215564	6	6.32659	6.16329	0.163295	8.55923	8.43788	8.49855	0.0606765
0000000110101011	9.39545	9.50125	9.44835	0.052904	6.59796	7.18083	6.88939	0.291433	8.743	8.7391	8.74105	0.00195313
0000000110101100	9.29689	9.27946	9.28817	0.00871183	6	6	6	0	8.47833	8.41231	8.44532	0.0330124
0000000110101101	9.34674	9.3544	9.35057	0.00383262	6.31447	6	6.15724	0.157237	8.52292	8.68926	8.60609	0.0831704
0000000110101110	9.22869	9.24417	9.23643	0.00773619	6	6	6	0	8.24933	8.28905	8.26919	0.0198601
0000000110101111	9.43889	9.40299	9.42094	0.0179524	6.44724	7.09095	6.76909	0.321854	8.75855	8.78857	8.77356	0.0150118
0000000110110000	9.26892	9.25206	9.26049	0.00843035	6	6.04363	6.02181	0.0218126	8.6716	8.587	8.6293	0.0423019
0000000110110001	9.33986	9.37341	9.35664	0.0167759	6.26675	7.07236	6.66955	0.402808	8.85926	8.70996	8.78461	0.0746505
0000000110110010	9.18754	9.11215	9.14985	0.0376954	6	6	6	0	8.22915	8.47507	8.35211	0.122958
0000000110110011	9.43255	9.44181	9.43718	0.00462809	7.00634	6.96673	6.98653	0.0198028	8.91644	8.9066	8.91152	0.00492264
0000000110110100	9.33804	9.26975	9.3039	0.0341439	6	6	6	0	8.70264	8.65927	8.68095	0.0216891
0000000110110101	9.337	9.364	9.3505	0.0134997	6	6.8239	6.41195	0.411948	8.84843	8.77394	8.81118	0.0372432
0000000110110110	9.20358	9.19733	9.20045	0.00312498	6	6	6	0	8.3284	8.31188	8.32014	0.0082594
0000000110110111	9.42019	9.38948	9.40484	0.0153515	7.16629	7.27513	7.22071	0.0544206	8.94462	8.87697	8.91079	0.0338266
0000000110111000	9.35183	9.25836	9.30509	0.0467359	6	6	6	0	8.44587	8.19187	8.31887	0.127
0000000110111001	9.38057	9.30541	9.34299	0.0375815	6.41901	7.1068	6.7629	0.343898	8.80728	8.75363	8.78045	0.0268218
0000000110111010	9.19921	9.1774	9.1883	0.0109078	6	6	6	0	8.26755	8.40648	8.33702	0.0694635
0000000110111011	9.44365	9.5295	9.48658	0.0429227	6.86946	7.07252	6.97099	0.101528	8.9347	8.92796	8.93133	0.00337104
0000000110111100	9.30246	9.36913	9.33579	0.0333359	6.30251	6.32949	6.316	0.0134883	8.4287	8.60555	8.51713	0.0884261
0000000110111101	9.38268	9.40586	9.39427	0.0115887	6.37655	6	6.18828	0.188277	8.79353	8.5971	8.69531	0.0982135
0000000110111110	9.23304	9.24549	9.23926	0.00622715	6	6	6	0	8.44735	8.40509	8.42622	0.0211297
0000000110111111	9.42544	9.43902	9.43223	0.00678844	7.21965	7.26125	7.24045	0.0208007	8.82935	8.91682	8.87308	0.0437333
0000000111000000	8.9885	8.95996	8.97423	0.0142732	6	6	6	0	6	6	6	0
0000000111000001	9.06802	9.01468	9.04135	0.0266691	6	6	6	0	6	6	6	0
0000000111000010	8.93608	8.84365	8.88986	0.0462145	6	6	6	0	6	6	6	0
0000000111000011	8.99362	8.98805	8.99083	0.00278188	6	6	6	0	6	6.83887	6.41944	0.419437
0000000111000100	8.96658	9.03537	9.00097	0.0343923	6	6	6	0	6	6	6	0
0000000111000101	9.02764	8.9946	9.01112	0.0165192	6	6	6	0	6	6	6	0
0000000111000110	8.82524	8.81328	8.81926	0.00598312	6	6	6	0	6	6	6	0
0000000111000111	9.02418	8.94102	8.9826	0.0415785	6	6	6	0	6	6	6	0
0000000111001000	8.92018	8.96194	8.94106	0.0208801	6	6	6	0	6	6	6	0
0000000111001001	9.0398	9.03011	9.03495	0.00484545	6	6	6	0	6	6	6	0
0000000111001010	9.05537	8.86217	8.95877	0.0966005	6	6	6	0	6	6	6	0
0000000111001011	8.99221	8.98271	8.98746	0.00475085	6	6	6	0	6	6	6	0
0000000111001100	8.98889	8.97317	8.98103	0.00786108	6	6	6	0	6	6	6	0
0000000111001101	8.99954	9.038	9.01877	0.0192329	6	6	6	0	6	6	6	0
0000000111001110	8.93668	8.93764	8.93716	0.000477356	6	6	6	0	6	6	6	0
0000000111001111	9.02822	8.94147	8.98484	0.0433748	6	6	6	0	6	6	6	0
0000000111010000	9.02282	9.04976	9.03629	0.0134729	6	6	6	0	6	6	6	0
0000000111010001	9.04087	9.05024	9.04556	0.00468886	6	6	6	0
0000000111010010	8.76293	8.84018	8.80155	0.0386256	6	6	6	0	6	6	6	0
0000000111010011	9.10613	9.01546	9.06079	0.0453361	6	6	6	0	7.94229	7.26936	7.60583	0.336462
0000000111010100	9.04213	8.95394	8.99803	0.0440949	6	6	6	0	6	6.92527	6.46264	0.462637
0000000111010101	9.05295	9.0285	9.04073	0.0122248	6	6	6	0
0000000111010110	8.85624	8.80222	8.82923	0.0270141	6	6	6	0	6	6	6	0
0000000111010111	9.05737	9.00054	9.02896	0.0284113	6	6	6	0
0000000111011000	8.96032	9.01115	8.98574	0.0254165	6	6	6	0	6	6	6	0
0000000111011001	9.48232	8.92182	9.20207	0.280247	6	6	6	0	6	6	6	0
0000000111011010	8.88126	8.78716	8.83421	0.0470455	6	6	6	0	6	6	6	0
0000000111011011	9.06816	9.17635	9.12225	0.0540916	6	6	6	0	6	6.94249	6.47125	0.471247
0000000111011100	9.01271	9.03184	9.02228	0.00956392	6	6	6	0	6	6	6	0
0000000111011101	9.10547	9.07459	9.09003	0.0154399	6	6	6	0	6	6	6	0
0000000111011110	8.84206	8.88699	8.86452	0.0224669	6	6	6	0	6	6	6	0
0000000111011111	9.18173	9.10096	9.14135	0.0403858	6	6	6	0
0000000111100000	9.5697	9.74912	9.65941	0.0897125	7.51307	7.17599	7.34453	0.168537	9.44303	9.40551	9.42427	0.0187603
0000000111100001	9.63175	9.96766	9.79971	0.167957	7.61756	7.82028	7.71892	0.101359	9.61269	9.52494	9.56882	0.0438776
0000000111100010	9.47691	9.46896	9.47294	0.00397644	7.57325	7.48322	7.52823	0.0450104	9.25288	9.31152	9.2822	0.029322
0000000111100011	9.59239	9.56109	9.57674	0.0156515	8.09197	7.94017	8.01607	0.0758962	9.7057	9.71298	9.70934	0.00363996
0000000111100100	9.70805	9.05444	9.38124	0.326808	7.15964	7.86952	7.51458	0.354944	9.64566	9.79806	9.72186	0.0761974
0000000111100101	9.60476	9.69783	9.6513	0.0465341	7.72669	7.83319	7.77994	0.0532529	9.50816	9.5726	9.54038	0.0322201
0000000111100110	9.56153	9.49617	9.52885	0.0326806	7.61262	7.67479	7.6437	0.0310862	9.40065	9.27674	9.3387	0.061955
0000000111100111	9.61485	9.81025	9.71255	0.0977011	7.9363	8.06621	8.00126	0.0649542	9.48846	9.73673	9.61259	0.124137
0000000111101000	9.5313	9.6503	9.5908	0.0595013	6.8835	6.89237	6.88794	0.00443901	9.21556	9.34016	9.27786	0.0623041
0000000111101001	9.62704	9.67229	9.64966	0.0226239	7.57873	7.92296	7.75085	0.172116	9.56463	9.52998	9.5473	0.0173211
0000000111101010	9.63282	9.58905	9.61093	0.0218824	7.09179	7.61186	7.35183	0.260034	9.20147	9.22239	9.21193	0.0104599
0000000111101011	9.61067	9.74998	9.68033	0.0696516	8.19987	8.21785	8.20886	0.00899085	9.57009	9.68875	9.62942	0.0593338
0000000111101100	9.52315	9.66098	9.59207	0.0689126	7.24725	7.4919	7.36958	0.122325	9.47241	9.17386	9.32313	0.14927
0000000111101101	9.64593	9.88803	9.76698	0.121051	8.00028	7.882	7.94114	0.0591405	9.50211	9.54874	9.52542	0.0233126
0000000111101110	9.45702	9.46521	9.46111	0.00409108	7.7471	7.63637	7.69173	0.055368	9.38624	9.20241	9.29432	0.0919159
0000000111101111	9.71219	9.61819	9.66519	0.0470023	7.78896	8.03782	7.91339	0.124431	9.69462	9.73282	9.71372	0.0191025
0000000111110000	9.66682	9.45751	9.56217	0.104655	6.90231	7.44139	7.17185	0.269542	9.69586		9.69586	0
0000000111110001	9.61871	9.73457	9.67664	0.0579297	7.65535	7.41513	7.53524	0.120111	9.54028	9.57587	9.55807	0.0177985
0000000111110010	9.32467	9.36887	9.34677	0.0221014	7.60072	7.50318	7.55195	0.0487731	9.38462	9.47453	9.42957	0.0449568
0000000111110011	9.67128	9.7378	9.70454	0.0332616	8.08385	7.85808	7.97097	0.112881	9.98312	10.1648	10.074	0.0908606
0000000111110100	9.58151	9.73685	9.65918	0.0776737	7.64197	7.51563	7.5788	0.063169	9.53558	9.51743	9.5265	0.00907716
0000000111110101	9.54024	9.81231	9.67627	0.136037	7.71087	7.61775	7.66431	0.0465627	9.54925	9.58781	9.56853	0.0192801
0000000111110110	9.43718	9.38322	9.4102	0.0269791	7.54559	7.53511	7.54035	0.00524142	9.399	9.30309	9.35104	0.0479507
0000000111110111	9.67225	9.724	9.69813	0.0258726	8.0365	8.13515	8.08583	0.0493206	9.64331	9.84665	9.74498	0.101672
0000000111111000	9.54428	9.42947	9.48688	0.0574079	7.5802	7.51397	7.54708	0.0331165	9.29781	9.36809	9.33295	0.0351386
0000000111111001	9.51315	9.70482	9.60899	0.0958355	7.55187	7.75415	7.65301	0.101139	9.59357	9.7479	9.67073	0.0771637
0000000111111010	9.47639	9.52816	9.50227	0.0258849	7.58607	7.57671	7.58139	0.00468058	9.32501	9.31404	9.31953	0.00548546
0000000111111011	9.6642	9.6239	9.64405	0.0201506	7.92695	7.98608	7.95652	0.029564	9.63537	9.74433	9.68985	0.0544782
0000000111111100	9.47219	9.57498	9.52359	0.0513912	7.66138	7.53429	7.59783	0.0635413	9.66011	9.49829	9.5792	0.0809124
0000000111111101	9.66724	9.57515	9.62119	0.0460474	7.77141	7.65958	7.7155	0.0559165	9.50791	9.41945	9.46368	0.0442306
0000000111111110	9.55141	9.51555	9.53348	0.017926	7.82559	7.40864	7.61711	0.208475	9.52439	9.46317	9.49378	0.0306078
0000000111111111	9.46788	9.64554	9.55671	0.0888282	8.11056	8.1071	8.10883	0.00172923	9.71218	9.67064	9.69141	0.0207687
0000001000000000	8.8023	8.76484	8.78357	0.01873	6	6	6	0	6	6	6	0
0000001000000001	8.83232	8.81516	8.82374	0.00857743	6	6	6	0	6	6	6	0
0000001000000010	8.59443	8.63153	8.61298	0.0185503	6	6	6	0	6	6	6	0
0000001000000011	8.8905	8.85986	8.87518	0.0153207	6	6	6	0	6	6	6	0
0000001000000100	8.86731	8.77123	8.81927	0.0480408	6	6	6	0	6	6	6	0
0000001000000101	8.80123	8.83183	8.81653	0.0152982	6	6	6	0	6	6	6	0
0000001000000110	8.6904	8.64825	8.66932	0.0210722	6	6	6	0	6	6	6	0
0000001000000111	8.85465	8.84594	8.8503	0.00435353	6	6	6	0	6	6	6	0
0000001000001000	8.81677	8.86068	8.83872	0.0219562	6	6	6	0	6	6	6	0
0000001000001001	8.86186	8.96811	8.91498	0.0531255	6	6	6	0	6	6	6	0
0000001000001010	8.71366	8.72956	8.72161	0.00795001	6	6	6	0	6	6	6	0
0000001000001011	8.82971	8.81404	8.82188	0.00783385	6	6	6	0	6	6	6	0
0000001000001100	8.79898	8.82796	8.81347	0.014489	6	6	6	0	6	6	6	0
0000001000001101	8.86505	8.83944	8.85225	0.0128031	6	6	6	0	6	6	6	0
0000001000001110	8.68068	8.81012	8.7454	0.0647213	6	6	6	0	6	6	6	0
0000001000001111	8.89264	8.83389	8.86326	0.0293743	6	6	6	0	6	6	6	0
0000001000010000	8.7791	8.76175	8.77043	0.00867514	6	6	6	0	6	6	6	0
0000001000010001	8.86527	8.7973	8.83128	0.033986	6	6	6	0	6	6	6	0
0000001000010010	8.71232	8.66392	8.68812	0.0241985	6	6	6	0	6	6	6	0
0000001000010011	8.91381	8.85574	8.88478	0.0290307	6	6	6	0	6	6.84994	6.42497	0.42497
0000001000010100	8.82772	8.79954	8.81363	0.014092	6	6	6	0	6	6	6	0
0000001000010101	8.82242	8.8439	8.83316	0.0107421	6	6	6	0	6	6	6	0
0000001000010110	8.65181	8.66597	8.65889	0.00707972	6	6	6	0	6	6	6	0
0000001000010111	8.87631	8.78565	8.83098	0.0453345	6	6	6	0	6	6.78318	6.39159	0.391589
0000001000011000	8.76289	8.82063	8.79176	0.0288671	6	6	6	0	6	6	6	0
0000001000011001	8.8527	8.91768	8.88519	0.0324873	6	6	6	0	6	6	6	0
0000001000011010	8.73686	8.72274	8.7298	0.00706062	6	6	6	0	6	6	6	0
0000001000011011	8.8794	8.88818	8.88379	0.00438845	6	6	6	0	6	6	6	0
0000001000011100	8.87657	8.73829	8.80743	0.0691428	6	6	6	0	6	6	6	0
0000001000011101	8.86166	8.86374	8.8627	0.00103857	6	6	6	0	6	6	6	0
0000001000011110	8.74867	8.70611	8.72739	0.0212783	6	6	6	0	6	6	6	0
0000001000011111	8.85421	8.84003	8.84712	0.00708976	6	6	6	0	6	6	6	0
0000001000100000	8.94547	8.93264	8.93906	0.00641239	6	6	6	0	8.00819	7.70382	7.856	0.152188
0000001000100001	9.05982	9.01161	9.03571	0.0241052	6	6	6	0	7.88415	8.05823	7.97119	0.0870403
0000001000100010	8.88973	8.83736	8.86355	0.0261876	6	6	6	0	7.69233	7.69471	7.69352	0.00119246
0000001000100011	9.03959	9.05962	9.0496	0.0100115	6	6	6	0	8.03474	8.2201	8.12742	0.0926814
0000001000100100	9.10858	8.99044	9.04951	0.0590718	6	6	6	0	7.75405	7.85934	7.8067	0.0526464
0000001000100101	9.07996	9.04293	9.06144	0.0185146	6	6	6	0	7.79193	8.04471	7.91832	0.126392
0000001000100110	8.96366	8.86672	8.91519	0.0484734	6	6	6	0	7.45275	7.824	7.63838	0.185627
0000001000100111	9.1193	9.11565	9.11748	0.00182374	6	6.35516	6.17758	0.177579	8.36462	8.24634	8.30548	0.0591382
0000001000101000	8.98598	8.99974	8.99286	0.00687953	6	6	6	0	7.69088	7.89826	7.79457	0.103691
0000001000101001	9.06525	9.01435	9.0398	0.0254491	6	6	6	0	7.95511	7.89964	7.92737	0.0277337
0000001000101010	8.93301	9.00507	8.96904	0.0360301	6	6	6	0	7.92364	7.63387	7.77875	0.144889
0000001000101011	9.13511	9.02324	9.07917	0.0559372	6	6	6	0	7.97826	8.22009	8.09917	0.120911
0000001000101100	8.97167	9.1053	9.03849	0.0668115	6	6	6	0	8.03035	7.70048	7.86542	0.164936
0000001000101101	9.13698	9.09706	9.11702	0.0199619	6	6.21399	6.107	0.106996	8.07316	8.52336	8.29826	0.225102
0000001000101110	9.00694	8.89646	8.9517	0.0552397	6	6	6	0	7.52793	7.7626	7.64527	0.117337
0000001000101111	9.15817	9.06952	9.11385	0.0443247	6	6	6	0	8.10242	8.13344	8.11793	0.0155073
0000001000110000	9.08253	9.00817	9.04535	0.0371826	6	6	6	0	8.05713	8.2807	8.16892	0.111785
0000001000110001	9.08904	9.09405	9.09154	0.00250392	6.19	6	6.095	0.0950015	8.3564	8.35911	8.35775	0.00135407
0000001000110010	8.90161	8.84861	8.87511	0.0265019	6	6	6	0	7.99108	7.70848	7.84978	0.141298
0000001000110011	9.25114	9.15	9.20057	0.05057	6.33945	6.87487	6.60716	0.267709	8.32692	8.43313	8.38002	0.0531053
0000001000110100	9.08692	9.12049	9.10371	0.0167836	6	6	6	0	8.23039	8.23052	8.23046	6.47562e-05
0000001000110101	9.13132	9.16612	9.14872	0.0173984	6	6	6	0	8.43606	8.206	8.32103	0.11503
0000001000110110	8.97246	8.84607	8.90927	0.0631953	6	6	6	0	8.18732	8.09584	8.14158	0.0457428
0000001000110111	9.19951	9.15145	9.17548	0.0240278	6	6	6	0	8.26873	8.16104	8.21488	0.0538439
0000001000111000	9.05461	9.05835	9.05648	0.00186735	6		6	0	8.22417	8.52039	8.37228	0.148112
0000001000111001	9.08844	9.08502	9.08673	0.001711	6	6.49697	6.24848	0.248483	8.62889	8.58117	8.60503	0.0238596
0000001000111010	9.00082	8.95352	8.97717	0.0236502	6	6	6	0	8.04151	7.68008	7.8608	0.180711
0000001000111011	9.26019	9.25785	9.25902	0.00117116	6	6.20612	6.10306	0.103058	8.40011	8.42128	8.41069	0.0105867
0000001000111100	9.14325	9.16234	9.15279	0.00954501	6.30219	7.13883	6.72051	0.418321	8.32053	8.2194	8.26997	0.0505645
0000001000111101	9.13867	9.18736	9.16301	0.0243443	6	6	6	0	8.12161	8.14618	8.1339	0.0122834
0000001000111110	9.0346	8.99202	9.01331	0.021288	6	6	6	0	8.01461	7.90824	7.96142	0.0531853
0000001000111111	9.22568	9.20856	9.21712	0.00855868	6		6	0	8.42985	8.34856	8.38921	0.0406498
0000001001000000	8.91175	8.821	8.86637	0.045375	6	6	6	0	6	6	6	0
0000001001000001	8.91429	8.86035	8.88732	0.026968	6	6	6	0	6	6	6	0
0000001001000010	8.71479	8.69158	8.70318	0.011603	6	6	6	0	6	6	6	0
0000001001000011	8.84992	8.86776	8.85884	0.00892143	6	6	6	0
0000001001000100	8.88442	8.86279	8.87361	0.0108167	6	6	6	0	6	6	6	0
0000001001000101	8.89359	8.91025	8.90192	0.00832757	6	6	6	0	6	6	6	0
0000001001000110	8.74631	8.78136	8.76384	0.0175277	6	6	6	0	6	6	6	0
0000001001000111	8.85861	8.8628	8.86071	0.00209609	6	6	6	0
0000001001001000	8.87917	8.92145	8.90031	0.0211428	6	6	6	0	6	6	6	0
0000001001001001	8.94098	8.92908	8.93503	0.00595175	6	6	6	0	6	6	6	0
0000001001001010	8.78696	8.76653	8.77674	0.0102113	6	6	6	0	6	6	6	0
0000001001001011	8.94028	8.8382	8.88924	0.05104	6	6	6	0
0000001001001100	8.94135	8.86124	8.90129	0.040055	6	6	6	0	6	6	6	0
0000001001001101	8.93746	8.89861	8.91803	0.0194294	6	6	6	0	6	6	6	0
0000001001001110	8.73167	8.83219	8.78193	0.0502598	6	6	6	0	6	6	6	0
0000001001001111	8.8393	8.8786	8.85895	0.0196475	6	6	6	0
0000001001010000	8.86155	8.84213	8.85184	0.00970799	6	6	6	0
0000001001010001	8.8776	8.80656	8.84208	0.0355227	6	6	6	0
0000001001010010	8.72833	8.69678	8.71255	0.0157742	6	6	6	0	6	6	6	0
0000001001010011	8.89543	8.89788	8.89665	0.00122774	6	6	6	0	8.09947	7.40828	7.75388	0.345594
0000001001010100	8.84502	8.89483	8.86993	0.024902	6	6	6	0	6	6	6	0
0000001001010101	8.8906	8.82848	8.85954	0.0310594	6	6	6	0	6.40255	6	6.20128	0.201277
0000001001010110	8.69838	8.63331	8.66585	0.0325375	6	6	6	0	6	6	6	0
0000001001010111	8.88308	8.86574	8.87441	0.00866833	6	6	6	0	8.17909	7.68157	7.93033	0.24876
0000001001011000	8.92191	8.85442	8.88817	0.0337454	6	6	6	0	6	6	6	0
0000001001011001	8.85757	8.88175	8.86966	0.0120881	6	6	6	0	7.24466	7.33033	7.2875	0.0428325
0000001001011010	8.80241	8.80098	8.8017	0.00071464	6	6	6	0	6	6	6	0
0000001001011011	8.93178	8.92692	8.92935	0.00243004	6	6	6	0	8.32824	8.12099	8.22462	0.103627
0000001001011100	8.87715	8.84575	8.86145	0.0156996	6	6	6	0	8.2112	7.65815	7.93467	0.276526
0000001001011101	8.87827	8.96863	8.92345	0.0451784	6	6	6	0
0000001001011110	8.76436	8.75148	8.75792	0.00643875	6	6	6	0	6	6	6	0
0000001001011111	8.98721	8.86337	8.92529	0.0619189	6	6	6	0
0000001001100000	9.22115	9.19409	9.20762	0.0135321	6.33664	6	6.16832	0.168321	8.75687	8.69029	8.72358	0.0332865
0000001001100001	9.27756	9.30249	9.29002	0.0124675					8.88823	8.83461	8.86142	0.0268117
0000001001100010	9.09495	9.01442	9.05469	0.040265	6	6	6	0	8.37239	8.36747	8.36993	0.0024641
0000001001100011	9.26363	9.22481	9.24422	0.01941	7.23233	7.14857	7.19045	0.0418794	8.88049	8.92988	8.90519	0.0246955
0000001001100100	9.22993	9.27925	9.25459	0.0246591	6.38439	6.12139	6.25289	0.131502	8.71732	8.87497	8.79615	0.0788209
0000001001100101	9.22923	9.17526	9.20224	0.0269863					8.82455	8.81967	8.82211	0.00243901
0000001001100110	9.12636	9.05913	9.09274	0.0336155	6.6956	7.31083	7.00321	0.307615	8.61941	8.33664	8.47803	0.141385
0000001001100111	9.23329	9.24533	9.23931	0.00601989					8.87218	8.91446	8.89332	0.0211426
0000001001101000	9.24286	9.13243	9.18765	0.0552151	6	6	6	0	8.3834	8.65295	8.51818	0.134776
0000001001101001	9.26841	9.26573	9.26707	0.00134344	6.35951	6.5815	6.47051	0.110996	8.76162	8.90547	8.83355	0.0719265
0000001001101010	9.15581	9.05101	9.10341	0.0524026	6.67537	6	6.33768	0.337683	8.6561	8.47005	8.56307	0.0930268
0000001001101011	9.3482	9.24203	9.29512	0.0530879	6	6.78564	6.39282	0.392818	8.96286	9.05133	9.00709	0.0442347
0000001001101100	9.21291	9.2087	9.21081	0.0021049	6	6	6	0	8.57622	8.7457	8.66096	0.0847415
0000001001101101	9.36084	9.31842	9.33963	0.0212088					9.03656	9.01467	9.02562	0.0109489
0000001001101110	9.1839	9.13612	9.16001	0.0238898	6	6	6	0	8.30234	8.42252	8.36243	0.0600867
0000001001101111	9.36161	9.27853	9.32007	0.0415408	6.90321	7.34753	7.12537	0.222158	8.83673	8.90017	8.86845	0.0317159
0000001001110000	9.23942	9.30029	9.26985	0.0304331	6.40015	7.14053	6.77034	0.370187	8.77997	8.81781	8.79889	0.0189237
0000001001110001	9.21138	9.1783	9.19484	0.0165376	6.42144	6	6.21072	0.210721	8.73348	8.69799	8.71573	0.0177448
0000001001110010	8.96512	8.97712	8.97112	0.00599731	6	6	6	0	8.36216	8.22551	8.29384	0.0683268
0000001001110011	9.27551	9.32464	9.30008	0.0245662	7.33015	6.70385	7.017	0.313154	8.82588	8.92802	8.87695	0.0510715
0000001001110100	9.16209	9.14732	9.15471	0.00738496	6	6.00663	6.00332	0.00331703	8.8572	8.8082	8.8327	0.0244981
0000001001110101	9.24653	9.18733	9.21693	0.0295982	6.17247	7.101	6.63673	0.464265	8.96011	8.96485	8.96248	0.00236965
0000001001110110	9.0163	8.88841	8.95235	0.0639475	6	6	6	0	8.27316	8.27982	8.27649	0.00333045
0000001001110111	9.22216	9.2662	9.24418	0.0220187					8.96364	9.04843	9.00603	0.0423973
0000001001111000	9.20489	9.1473	9.1761	0.0287965		6.41702	6.41702	0	8.82681	8.52118	8.67399	0.152815
0000001001111001	9.21622	9.21952	9.21787	0.0016494	6.37228	6	6.18614	0.186139	8.73067	9.02362	8.87715	0.146472
0000001001111010	9.13336	8.99242	9.06289	0.0704738	6.32283		6.32283	0	8.50112	8.46185	8.48149	0.0196333
0000001001111011	9.29229	9.32388	9.30808	0.0157941					8.83887	8.83874	8.83881	6.38581e-05
0000001001111100	9.1744	9.19629	9.18535	0.0109441	6	6	6	0	8.79072	8.83238	8.81155	0.0208262
0000001001111101	9.35844	9.23572	9.29708	0.0613616	6	6.13059	6.0653	0.0652956	8.72909	8.89089	8.80999	0.0808988
0000001001111110	9.05807	9.06063	9.05935	0.00127983	6.1744	6.06253	6.11847	0.0559356	8.65365	8.60137	8.62751	0.0261433
0000001001111111	9.2634	9.24166	9.25253	0.0108672	6.13279	6.48025	6.30652	0.17373	8.87681	8.95997	8.91839	0.0415803
0000001010000000	8.84594	8.77875	8.81234	0.0335915	6	6	6	0	6	6	6	0
0000001010000001	8.83243	8.8599	8.84616	0.013737	6	6	6	0
0000001010000010	8.68902	8.62687	8.65794	0.0310734	6	6	6	0	6	6	6	0
0000001010000011	8.85559	8.82159	8.83859	0.017	6	6	6	0	6	6	6	0
0000001010000100	8.81293	8.82342	8.81818	0.00524028	6	6	6	0	6	6	6	0
0000001010000101	8.88194	8.85643	8.86919	0.0127577	6	6	6	0
0000001010000110	8.75046	8.72333	8.7369	0.0135696	6	6	6	0	6	6	6	0
0000001010000111	8.90842	8.80346	8.85594	0.05248	6	6	6	0	6	6	6	0
0000001010001000	8.86154	8.88555	8.87354	0.0120014	6	6	6	0	6	6	6	0
0000001010001001	8.87655	8.90967	8.89311	0.0165596	6	6	6	0
0000001010001010	8.76452	8.74901	8.75677	0.00775496	6	6	6	0	6	6	6	0
0000001010001011	8.91368	8.88408	8.89888	0.0148	6	6	6	0
0000001010001100	8.81115	8.76191	8.78653	0.024618	6	6	6	0	6	6	6	0
0000001010001101	8.81258	8.88541	8.849	0.0364137	6	6	6	0	6	6	6	0
0000001010001110	8.71385	8.75739	8.73562	0.0217682	6	6	6	0	6	6	6	0
0000001010001111	8.89103	8.91641	8.90372	0.0126895	6	6	6	0	6	6.91367	6.45683	0.456834
0000001010010000	8.71546	8.76196	8.73871	0.0232451	6	6	6	0	6	6	6	0
0000001010010001	8.87373	8.81909	8.84641	0.0273192	6	6	6	0	6	6	6	0
0000001010010010	8.66362	8.64769	8.65565	0.00796929	6	6	6	0	6	6	6	0
0000001010010011	8.86361	8.92731	8.89546	0.0318501	6	6	6	0
0000001010010100	8.80633	8.83228	8.8193	0.0129716	6	6	6	0	6	6	6	0
0000001010010101	8.80252	8.82563	8.81407	0.0115518	6	6	6	0	6	6	6	0
0000001010010110	8.62764	8.62595	8.62679	0.000843623	6	6	6	0	6	6	6	0
0000001010010111	8.89056	8.79061	8.84059	0.0499734	6	6	6	0	6	6	6	0
0000001010011000	8.78548	8.91725	8.85136	0.0658888	6	6	6	0	6	6	6	0
0000001010011001	8.8981	8.81059	8.85434	0.0437557	6	6	6	0	6	6	6	0
0000001010011010	8.7152	8.66912	8.69216	0.0230427	6	6	6	0	6	6	6	0
0000001010011011	8.86308	8.83957	8.85132	0.0117575	6	6	6	0	6	6	6	0
0000001010011100	8.83832	8.75319	8.79576	0.042561	6	6	6	0	6	6	6	0
0000001010011101	8.84994	8.90917	8.87956	0.0296144	6	6	6	0	6	6.61011	6.30505	0.305054
0000001010011110	8.70247	8.62853	8.6655	0.036971	6	6	6	0	6	6	6	0
0000001010011111	8.87549	8.91886	8.89717	0.0216841	6	6	6	0	6	6.59276	6.29638	0.29638
0000001010100000	8.99656	9.05734	9.02695	0.0303901	6	6	6	0	8.03078	7.80214	7.91646	0.114322
0000001010100001	9.10525	9.08598	9.09562	0.0096335	6	6	6	0	8.28889	8.13365	8.21127	0.0776215
0000001010100010	8.8697	8.86971	8.8697	3.53388e-06	6	6	6	0	7.76813	7.60372	7.68593	0.0822016
0000001010100011	9.10935	9.08835	9.09885	0.0104997	6	6.15852	6.07926	0.0792599	8.24138	8.18436	8.21287	0.0285122
0000001010100100	9.06522	9.00699	9.0361	0.0291123	6	6	6	0	8.01807	8.19432	8.1062	0.088126
0000001010100101	9.10895	9.09775	9.10335	0.0055992	6	6	6	0	7.85537	8.00423	7.9298	0.0744308
0000001010100110	8.92739	8.89985	8.91362	0.0137705	6	6	6	0	7.7419	7.5502	7.64605	0.0958518
0000001010100111	9.11252	9.12214	9.11733	0.00480882	6.03029	6	6.01515	0.0151471	8.35826	8.29648	8.32737	0.0308911
0000001010101000	9.05018	9.01004	9.03011	0.0200684	6	6	6	0	8.27253	8.37202	8.32228	0.0497443
0000001010101001	9.08436	9.14102	9.11269	0.0283282	6	6.03577	6.01788	0.0178845	8.41502	8.1795	8.29726	0.117763
0000001010101010	8.95684	8.88866	8.92275	0.0340881	6	6	6	0	7.44441	7.41956	7.43199	0.0124219
0000001010101011	9.15546	9.13311	9.14429	0.0111716	6	6	6	0	8.29093	8.3158	8.30337	0.0124342
0000001010101100	9.02979	9.14352	9.08665	0.0568607	6	6	6	0	8.01296	7.77443	7.8937	0.119268
0000001010101101	9.17271	9.14559	9.15915	0.01356	6	6	6	0	8.33239	8.23644	8.28442	0.0479745
0000001010101110	8.91122	8.87939	8.8953	0.0159154	6	6	6	0	7.68167	7.75756	7.71962	0.0379453
0000001010101111	9.1671	9.12827	9.14769	0.0194171	6.19885	6	6.09942	0.0994233	8.27799	8.30223	8.29011	0.012119
0000001010110000	9.03925	8.99651	9.01788	0.0213715	6	6	6	0	8.18233	8.16118	8.17175	0.0105738
0000001010110001	9.15372	9.20322	9.17847	0.0247498	6	6	6	0	8.25636	8.62908	8.44272	0.186364
0000001010110010	8.86671	8.82686	8.84679	0.0199291	6	6	6	0	7.72929	7.97016	7.84972	0.120438
0000001010110011	9.18255	9.20367	9.19311	0.0105615	6.0032	6	6.0016	0.00159839	8.07477	8.4367	8.25573	0.180968
0000001010110100	9.13332	9.05444	9.09388	0.0394392	6	6	6	0	8.14896	8.35411	8.25153	0.102572
0000001010110101	9.21579	9.25842	9.2371	0.0213193	6	6	6	0	8.31168	8.33318	8.32243	0.0107486
0000001010110110	8.99862	8.90321	8.95092	0.0477037	6	6	6	0	7.96613	8.0139	7.99002	0.023883
0000001010110111	9.19412	9.17823	9.18618	0.00794237	6	6	6	0	8.45071	8.46769	8.4592	0.00849404
0000001010111000	9.05657	9.06292	9.05975	0.00317514	6	6	6	0	8.19463	7.97523	8.08493	0.109703
0000001010111001	9.20215	9.15877	9.18046	0.0216893	6	6	6	0	8.45702	8.30594	8.38148	0.0755384
0000001010111010	8.93504	8.9262	8.93062	0.00441811	6	6.01366	6.00683	0.00682987	7.70708	7.79716	7.75212	0.0450429
0000001010111011	9.23814	9.2265	9.23232	0.00582098	6.2765	6.79421	6.53536	0.258856	8.53263	8.55947	8.54605	0.013421
0000001010111100	9.11878	9.06783	9.0933	0.0254758	6	6	6	0	8.20395	8.08218	8.14306	0.060884
0000001010111101	9.27572	9.2218	9.24876	0.0269615	6	6.05498	6.02749	0.0274902	8.59624	8.58425	8.59025	0.00599139
0000001010111110	8.95593	8.90027	8.9281	0.0278302	6	6	6	0	7.73509	7.96006	7.84757	0.112485
0000001010111111	9.23948	9.15661	9.19805	0.041436	6.15932	6.97708	6.5682	0.408881	8.59684	8.51237	8.5546	0.0422339
0000001011000000	8.86376	8.84865	8.8562	0.00755335	6	6	6	0	6	6	6	0
0000001011000001	8.9057	8.89657	8.90114	0.0045647	6	6	6	0	7.80685	7.76802	7.78743	0.0194166
0000001011000010	8.74031	8.64698	8.69365	0.0466648	6	6	6	0	6	6	6	0
0000001011000011	8.91415	8.92117	8.91766	0.00350703	6	6	6	0	7.31112	7.62352	7.46732	0.156204
0000001011000100	8.83742	8.88052	8.85897	0.0215466	6	6	6	0	6	6	6	0
0000001011000101	8.88101	8.87456	8.87778	0.00322576	6	6	6	0
0000001011000110	8.77485	8.73284	8.75385	0.0210059	6	6	6	0	6	6	6	0
0000001011000111	8.93783	8.83218	8.88501	0.0528287	6	6	6	0	7.47467	7.8319	7.65329	0.178619
0000001011001000	8.88072	8.81437	8.84755	0.0331747	6	6	6	0	6	6	6	0
0000001011001001	8.90547	8.94474	8.92511	0.0196319	6	6	6	0
0000001011001010	8.82399	8.79849	8.81124	0.0127482	6	6	6	0
0000001011001011	8.8903	8.94109	8.9157	0.0253952	6	6	6	0	7.37033	7.64937	7.50985	0.13952
0000001011001100	8.91212	8.85444	8.88328	0.0288385	6	6	6	0	6	6	6	0
0000001011001101	8.90732	8.90448	8.9059	0.00142045	6	6	6	0	6	6.95718	6.47859	0.478592
0000001011001110	8.8132	8.72031	8.76675	0.0464453	6	6	6	0	6	6	6	0
0000001011001111	8.91773	8.92077	8.91925	0.00151985	6	6	6	0	7.6699	7.1904	7.43015	0.239752
0000001011010000	8.85191	8.8994	8.87565	0.0237474	6	6	6	0	7.50691	7.10862	7.30776	0.199144
0000001011010001	8.87543	8.88417	8.8798	0.00436951	6	6	6	0	7.86566	7.6478	7.75673	0.10893
0000001011010010	8.70579	8.77229	8.73904	0.0332501	6	6	6	0	6	6	6	0
0000001011010011	8.89629	8.87877	8.88753	0.00876057	6	6	6	0	7.84303	7.75222	7.79763	0.0454051
0000001011010100	8.87639	8.90635	8.89137	0.0149813	6	6	6	0	7.40022	7.13695	7.26858	0.131635
0000001011010101	8.85514	8.85937	8.85725	0.00211619	6	6	6	0
0000001011010110	8.66956	8.6266	8.64808	0.0214757	6	6	6	0	6	6	6	0
0000001011010111	8.88699	8.94799	8.91749	0.0305019	6	6	6	0	8.46775	8.53142	8.49958	0.0318315
0000001011011000	8.82479	8.76269	8.79374	0.0310481	6	6	6	0	6		6	0
0000001011011001	8.9203	8.92243	8.92136	0.00106258	6	6	6	0	7.18568	7.38182	7.28375	0.0980716
0000001011011010	8.72515	8.77499	8.75007	0.0249201	6	6	6	0	6	6	6	0
0000001011011011	8.89601	8.94557	8.92079	0.0247768	6	6	6	0	7.54478	7.18101	7.36289	0.181886
0000001011011100	8.84049	8.80659	8.82354	0.0169523	6	6	6	0	7.38712	7.84106	7.61409	0.226969
0000001011011101	8.85353	8.87947	8.8665	0.012969	6	6	6	0
0000001011011110	8.69422	8.77039	8.73231	0.0380872	6	6	6	0
0000001011011111	8.95345	8.91409	8.93377	0.0196799	6	6	6	0	7.82474	7.50313	7.66394	0.160805
0000001011100000	9.33291	9.33988	9.3364	0.00348604	7.5481	7.8353	7.6917	0.143599	8.83017	9.05363	8.9419	0.111728
0000001011100001	9.31094	9.27292	9.29193	0.0190094	7.00049	7.06832	7.03441	0.0339143	9.14304	9.06615	9.1046	0.0384433
0000001011100010	9.09522	9.10422	9.09972	0.00450176	6	6.13481	6.0674	0.0674037	8.71542	8.63858	8.677	0.0384208
0000001011100011	9.417	9.43807	9.42753	0.0105312	7.545	7.43588	7.49044	0.0545587	9.15539	9.22361	9.1895	0.0341107
0000001011100100	9.33031	9.35209	9.3412	0.0108901	6.84629	7.51324	7.17976	0.333473	9.12897	9.16003	9.1445	0.0155279
0000001011100101	9.3688	9.44031	9.40456	0.0357544	7.17565	7.12656	7.1511	0.0245458	9.11447	9.04392	9.07919	0.0352747
0000001011100110	9.09366	9.09471	9.09419	0.00052827	6	6	6	0	8.70224	8.50539	8.60382	0.0984259
0000001011100111	9.42332	9.4409	9.43211	0.00878827	7.07031	7.20145	7.13588	0.0655714	9.18626	9.12672	9.15649	0.0297699
0000001011101000	9.35026	9.24162	9.29594	0.0543164	6.51031	6.98282	6.74656	0.236256	8.99163	8.71746	8.85454	0.137086
0000001011101001	9.4525	9.50664	9.47957	0.0270718	6.86487	7.30507	7.08497	0.220101	8.97986	9.18772	9.08379	0.103929
0000001011101010	9.18769	9.22781	9.20775	0.0200595					8.63818	8.7784	8.70829	0.0701133
0000001011101011	9.46822	9.56495	9.51659	0.0483667	7.43014	7.48314	7.45664	0.0264988	9.26153	9.11679	9.18916	0.0723711
0000001011101100	9.3862	9.39818	9.39219	0.00599167	6.6024	7.15151	6.87696	0.274557	8.90446	8.91829	8.91137	0.00691226
0000001011101101	9.49236	9.33427	9.41331	0.0790438	6.7778	7.56789	7.17285	0.395043	9.15481	9.26321	9.20901	0.0542003
0000001011101110	9.25023	9.23649	9.24336	0.00686742	6.51652	7.08879	6.80265	0.286135	8.87688	8.83431	8.85559	0.021284
0000001011101111	9.46984	9.43149	9.45067	0.0191728	7.64142	7.19837	7.41989	0.221524	9.15197	9.34513	9.24855	0.0965798
0000001011110000	9.23916	9.26661	9.25289	0.0137254					9.06229	8.9389	9.00059	0.0616974
0000001011110001	9.3463	9.34517	9.34573	0.000566839	7.27642	7.57953	7.42797	0.151556	9.02172	9.04883	9.03528	0.0135577
0000001011110010	9.00675	9.08947	9.04811	0.0413582	6.31237	6.33957	6.32597	0.0135987	8.69546	8.64423	8.66984	0.0256153
0000001011110011	9.43949	9.44896	9.44423	0.00473659	7.24612	7.56745	7.40678	0.160664	9.17178	9.18453	9.17815	0.00637502
0000001011110100	9.40737	9.35837	9.38287	0.0244998	6.28528	7.22713	6.7562	0.470924	8.90387	8.88665	8.89526	0.00861367
0000001011110101	9.39349	9.3176	9.35555	0.0379461	7.22967	7.43753	7.3336	0.103934	9.16198	9.18465	9.17331	0.0113378
0000001011110110	9.00383	9.03624	9.02004	0.0162044	6	6	6	0	8.69766	8.68527	8.69146	0.00619725
0000001011110111	9.4083	9.2953	9.3518	0.0565002	7.03152	7.52755	7.27953	0.248019	9.15667	9.0732	9.11494	0.0417377
0000001011111000	9.22912	9.16621	9.19766	0.0314563	6.45199	6.04789	6.24994	0.202051	8.79423	8.85141	8.82282	0.028593
0000001011111001	9.403	9.39923	9.40111	0.00188453					8.94892	9.10071	9.02481	0.0758922
0000001011111010	9.15069	9.0855	9.1181	0.0325933	6.78663	7.11246	6.94954	0.162913	8.78059	8.94243	8.86151	0.0809207
0000001011111011	9.3908	9.38455	9.38767	0.00312691	7.19648	7.62993	7.4132	0.216727	9.15083	9.14649	9.14866	0.00216869
0000001011111100	9.31192	9.25717	9.28454	0.0273726	6.60183	7.02978	6.81581	0.213975	8.99916	8.91601	8.95759	0.0415791
0000001011111101	9.48036	9.4599	9.47013	0.0102279	6.57867	7.10379	6.84123	0.26256	9.0591	9.08717	9.07313	0.0140369
0000001011111110	9.1649	9.18763	9.17627	0.0113609	6.75805	6.40919	6.58362	0.174428	8.79774	8.62672	8.71223	0.0855122
0000001011111111	9.41965	9.36301	9.39133	0.0283203	7.32845	7.01448	7.17146	0.156983	9.18226	8.96381	9.07303	0.109223
0000001100000000	8.90737	8.87763	8.8925	0.0148704	6	6	6	0	6	6	6	0
0000001100000001	8.9399	8.97807	8.95899	0.019085	6	6	6	0	6	6	6	0
0000001100000010	8.7646	8.76757	8.76608	0.00148238	6	6	6	0	6	6	6	0
0000001100000011	8.91136	8.91829	8.91482	0.00346834	6	6	6	0	6	6	6	0
0000001100000100	8.88617	8.93122	8.9087	0.0225253	6	6	6	0	6	6	6	0
0000001100000101	8.91126	8.8565	8.88388	0.027378	6	6	6	0	6	6.885	6.4425	0.442498
0000001100000110	8.73851	8.76146	8.74998	0.0114743	6	6	6	0	6	6	6	0
0000001100000111	8.91363	8.91646	8.91505	0.00141262	6	6	6	0	6	6	6	0
0000001100001000	8.95065	8.8655	8.90807	0.0425774	6	6	6	0	6	6	6	0
0000001100001001	8.94555	8.92891	8.93723	0.00832176	6	6	6	0	6	6	6	0
0000001100001010	8.83166	8.79072	8.81119	0.0204722	6	6	6	0	6	6	6	0
0000001100001011	8.93976	8.88858	8.91417	0.0255916	6	6	6	0	7.72739	7.61044	7.66892	0.0584759
0000001100001100	8.91865	8.90121	8.90993	0.00871987	6	6	6	0	6	6	6	0
0000001100001101	8.94917	8.96191	8.95554	0.00636986	6	6	6	0	6	6	6	0
0000001100001110	8.78961	8.84642	8.81802	0.0284045	6	6	6	0	6	6	6	0
0000001100001111	8.91716	8.9197	8.91843	0.0012715	6	6	6	0	6.19145	6	6.09573	0.0957251
0000001100010000	8.86507	8.89497	8.88002	0.0149496	6	6	6	0	6	6	6	0
0000001100010001	8.92324	8.92297	8.92311	0.000137989	6	6	6	0	6	6	6	0
0000001100010010	8.73237	8.68661	8.70949	0.0228835	6	6	6	0	6	6	6	0
0000001100010011	8.83013	8.903	8.86656	0.0364353	6	6	6	0	6	6	6	0
0000001100010100	8.91579	8.86968	8.89274	0.023057	6	6	6	0	6	6	6	0
0000001100010101	8.89601	8.88831	8.89216	0.00384621	6	6	6	0	6	6	6	0
0000001100010110	8.79822	8.79286	8.79554	0.00268114	6	6	6	0	6	6	6	0
0000001100010111	8.90694	8.8716	8.88927	0.0176688	6	6	6	0	6	6	6	0
0000001100011000	8.92175	8.88912	8.90544	0.0163162	6	6	6	0	6	6	6	0
0000001100011001	8.93096	8.90565	8.91831	0.0126544	6	6	6	0	6	6	6	0
0000001100011010	8.79272	8.74604	8.76938	0.0233417	6	6	6	0	6	6	6	0
0000001100011011	8.95524	8.91453	8.93489	0.020357	6	6	6	0	6	6	6	0
0000001100011100	8.89123	8.86638	8.8788	0.0124251	6	6	6	0	6	6	6	0
0000001100011101	8.94217	8.93299	8.93758	0.0045891	6	6	6	0	6	6	6	0
0000001100011110	8.79914	8.78563	8.79239	0.00675577	6	6	6	0	6	6	6	0
0000001100011111	8.95883	8.97849	8.96866	0.00982866	6.23385	6	6.11693	0.116926	6	6	6	0
0000001100100000	9.43594	9.48327	9.4596	0.0236662	6.24217	6.87191	6.55704	0.31487	8.98935	9.10366	9.0465	0.0571527
0000001100100001	9.55339	9.49711	9.52525	0.0281429	6.12845	7.09835	6.6134	0.48495	9.13418	9.18783	9.161	0.0268258
0000001100100010	9.346	9.21918	9.28259	0.063407	6.28453	6.36175	6.32314	0.0386125	8.70342	8.58186	8.64264	0.0607774
0000001100100011	9.56756	9.56389	9.56572	0.00183325	7.36664	7.32691	7.34677	0.0198659	9.24135	9.38003	9.31069	0.0693387
0000001100100100	9.52685	9.53245	9.52965	0.00279864	6.54117	6.94343	6.7423	0.201129	9.21352	9.11307	9.16329	0.0502223
0000001100100101	9.54758	9.50576	9.52667	0.0209106	7.09899	6.90804	7.00351	0.0954738	9.26263	9.1593	9.21097	0.0516611
0000001100100110	9.35185	9.27951	9.31568	0.0361717	6	6.32805	6.16402	0.164025	8.76214	8.76449	8.76331	0.00117232
0000001100100111	9.58515	9.62427	9.60471	0.0195609	7.78703	7.50064	7.64383	0.143196	9.29636	9.09925	9.19781	0.098557
0000001100101000	9.48117	9.49183	9.4865	0.00533016	6.03416	6.44722	6.24069	0.20653	8.90382	9.05547	8.97964	0.0758278
0000001100101001	9.49718	9.4387	9.46794	0.0292392	6.80901	7.0446	6.92681	0.117797	9.20916	9.09203	9.1506	0.0585638
0000001100101010	9.431	9.34732	9.38916	0.0418377	6	6.20768	6.10384	0.10384	8.87187	8.56139	8.71663	0.155239
0000001100101011	9.58154	9.68557	9.63355	0.0520158	7.48383	7.45576	7.4698	0.0140321	9.18333	9.29633	9.23983	0.0564992
0000001100101100	9.54407	9.40814	9.4761	0.067965	6.4722	7.32664	6.89942	0.427217	9.19022	9.01769	9.10396	0.0862611
0000001100101101	9.61996	9.62241	9.62119	0.00122269	7.26797	7.44947	7.35872	0.0907519	9.27148	9.23816	9.25482	0.0166574
0000001100101110	9.38595	9.41606	9.40101	0.0150557	6.22781	6.34583	6.28682	0.059007	8.71741	8.69524	8.70632	0.0110881
0000001100101111	9.5904	9.64741	9.61891	0.0285077	7.23632	7.07434	7.15533	0.0809913	9.3502	9.38565	9.36792	0.0177259
0000001100110000	9.51739	9.46437	9.49088	0.026513	6.94685	7.23206	7.08945	0.142602	9.22024	9.10931	9.16477	0.0554617
0000001100110001	9.50479	9.47442	9.4896	0.015187	6.55377	7.03194	6.79286	0.239084	9.20471	9.30712	9.25592	0.0512058
0000001100110010	9.28952	9.31465	9.30209	0.0125651	6.16206	6.3481	6.25508	0.0930183	8.69486	8.69197	8.69342	0.00144377
0000001100110011	9.53626	9.58016	9.55821	0.0219482	7.30268	6.8982	7.10044	0.202243	9.30243	9.29585	9.29914	0.00328727
0000001100110100	9.54231	9.45038	9.49635	0.0459664	6.6404	6.76855	6.70447	0.0640726	9.26122	9.1078	9.18451	0.0767121
0000001100110101	9.57148	9.47857	9.52502	0.0464538	6.56062	7.01886	6.78974	0.229123	9.29054	9.43977	9.36515	0.0746182
0000001100110110	9.29018	9.32084	9.30551	0.0153319	6.68825	6.13881	6.41353	0.274717	8.88321	8.9515	8.91736	0.0341432
0000001100110111	9.5578	9.59944	9.57862	0.0208232	7.69612	7.07933	7.38773	0.308397	9.19963	9.27756	9.2386	0.0389633
0000001100111000	9.39583	9.4615	9.42867	0.0328383					9.04635	8.90339	8.97487	0.0714804
0000001100111001	9.52306	9.57092	9.54699	0.0239309	7.33367	7.29427	7.31397	0.0197022	9.31199	9.19938	9.25568	0.0563052
0000001100111010	9.3721	9.37702	9.37456	0.00245913	6.76653	7.62045	7.19349	0.426956	8.90119	8.81669	8.85894	0.0422473
0000001100111011	9.60591	9.66808	9.637	0.0310883	7.24678	7.15207	7.19943	0.0473551	9.25568	9.1869	9.22129	0.0343893
0000001100111100	9.45443	9.52438	9.48941	0.034971	6.40907	6.91608	6.66258	0.253505	9.05971	9.07291	9.06631	0.00659634
0000001100111101	9.52777	9.58451	9.55614	0.0283724	7.05682	7.17406	7.11544	0.0586209	9.32185	9.17208	9.24696	0.0748858
0000001100111110	9.40236	9.48425	9.4433	0.0409447	6.4325	6.67697	6.55474	0.122233	8.84886	8.74605	8.79745	0.0514025
0000001100111111	9.5593	9.6244	9.59185	0.032552	6.88663	6.98179	6.93421	0.0475808	9.33424	9.12133	9.22779	0.106458
0000001101000000	9.17694	9.15777	9.16736	0.0095867	6	6	6	0	7.23577	7.554	7.39488	0.159112
0000001101000001	9.22376	9.15222	9.18799	0.0357711	6	6	6	0	8.13529	8.13859	8.13694	0.00165048
0000001101000010	9.02008	9.04768	9.03388	0.0138042	6	6	6	0	7.71864	7.87329	7.79597	0.0773248
0000001101000011	9.34368	9.30556	9.32462	0.0190612	6	6	6	0	7.60598	7.48546	7.54572	0.060261
0000001101000100	9.27242	9.20542	9.23892	0.0335003	6	6	6	0	7.85772	8.01119	7.93446	0.0767356
0000001101000101	9.25433	9.26153	9.25793	0.00359992	6	6	6	0	7.68256	7.64559	7.66408	0.018488
0000001101000110	9.05398	9.03277	9.04337	0.0106049	6	6	6	0	7.74761	7.25684	7.50222	0.245384
0000001101000111	9.19902	9.23981	9.21941	0.0203938	6	6	6	0	7.736	7.65869	7.69734	0.0386514
0000001101001000	9.22201	9.14924	9.18563	0.036386	6	6	6	0	7.45519	7.71235	7.58377	0.128578
0000001101001001	9.30881	9.24663	9.27772	0.0310868	6	6	6	0	7.65484	7.8592	7.75702	0.102181
0000001101001010	9.12677	9.06856	9.09766	0.0291046	6	6	6	0	7.66108	7.32854	7.49481	0.166269
0000001101001011	9.30911	9.26021	9.28466	0.0244471	6	6	6	0	7.93649	7.73662	7.83655	0.0999369
0000001101001100	9.21951	9.19119	9.20535	0.0141569	6	6	6	0	7.56174	7.65047	7.60611	0.0443673
0000001101001101	9.31059	9.26384	9.28721	0.0233764	6	6	6	0	7.8307	8.10532	7.96801	0.137309
0000001101001110	9.09801	9.04996	9.07398	0.0240286	6	6	6	0
0000001101001111	9.31333	9.2542	9.28376	0.0295641	6	6	6	0	7.66077	7.87917	7.76997	0.109201
0000001101010000	9.32466	9.24853	9.28659	0.0380685	6	6	6	0	7.38637	7.48614	7.43626	0.0498825
0000001101010001	9.37851	9.34755	9.36303	0.0154805	6	6	6	0	7.64002	7.94876	7.79439	0.154369
0000001101010010	9.12989	9.07324	9.10156	0.0283244	6	6	6	0	7.37845	7.9938	7.68612	0.307675
0000001101010011	9.40333	9.43165	9.41749	0.0141606	6	6	6	0	7.72176	7.74121	7.73149	0.00972453
0000001101010100	9.3802	9.32512	9.35266	0.0275378	6	6	6	0	7.40628	7.89677	7.65153	0.245247
0000001101010101	9.41167	9.45184	9.43176	0.0200847	6	6	6	0	7.68491	7.75973	7.72232	0.0374132
0000001101010110	9.14096	9.09774	9.11935	0.0216089	6	6	6	0	7.64592	7.23791	7.44191	0.204003
0000001101010111	9.44092	9.38516	9.41304	0.0278794	6	6	6	0	7.71224	8.12986	7.92105	0.20881
0000001101011000	9.1957	9.25967	9.22769	0.0319828	6	6	6	0	7.88143	7.79223	7.83683	0.0446022
0000001101011001	9.42098	9.49237	9.45667	0.0356971	6	6	6	0	7.77898	7.80902	7.794	0.0150206
0000001101011010	9.17607	9.12769	9.15188	0.0241939	6	6	6	0	7.53622	7.43475	7.48549	0.0507322
0000001101011011	9.46112	9.50224	9.48168	0.0205568	6	6	6	0	7.98339	8.07525	8.02932	0.0459283
0000001101011100	9.41794	9.34575	9.38184	0.0360955	6	6	6	0	8.10619	7.51579	7.81099	0.295202
0000001101011101	9.40113	9.46669	9.43391	0.0327791	6	6	6	0	7.47671	7.90753	7.69212	0.215412
0000001101011110	9.17999	9.12422	9.1521	0.0278845	6	6	6	0	7.80716	7.62533	7.71625	0.0909138
0000001101011111	9.54602	9.55104	9.54853	0.00251133	6	6	6	0	8.00722	8.01929	8.01325	0.00603399
0000001101100000	9.71352	9.68662	9.70007	0.0134475	7.88506	7.64243	7.76374	0.121315	9.56077	9.66148	9.61113	0.0503561
0000001101100001	9.71693	9.76873	9.74283	0.0259043	7.8498	7.8946	7.8722	0.0224017	9.5809	9.66375	9.62233	0.0414216
0000001101100010	9.60313	9.69619	9.64966	0.0465315	7.63758	7.73342	7.6855	0.0479185	9.39708	9.28914	9.34311	0.0539689
0000001101100011	9.75851	9.79961	9.77906	0.020547	8.06749	8.09008	8.07878	0.0112959	9.65906	9.62448	9.64177	0.0172892
0000001101100100	9.79354	9.68869	9.74111	0.0524205	7.50882	7.80996	7.65939	0.150571	9.69533	9.55036	9.62285	0.0724872
0000001101100101	9.78191	9.83448	9.8082	0.0262825	7.83744	7.75547	7.79645	0.040985	9.57031	9.61793	9.59412	0.0238067
0000001101100110	9.62444	9.65943	9.64194	0.0174971	7.47571	7.53126	7.50349	0.0277726	9.39488	9.42106	9.40797	0.0130895
0000001101100111	9.7254	9.71831	9.72185	0.00354017	8.03513	8.14788	8.0915	0.0563772	9.66728	9.55855	9.61291	0.0543641
0000001101101000	9.74667	9.77218	9.75942	0.0127559	7.80292	7.38065	7.59178	0.211134	9.4878	9.41115	9.44948	0.0383285
0000001101101001	9.78891	9.72224	9.75557	0.0333382	7.80741	7.63609	7.72175	0.0856593	9.6337	9.62711	9.6304	0.00329752
0000001101101010	9.69662	9.67055	9.68358	0.0130317	7.54292	7.5013	7.52211	0.0208134	9.35951	9.40222	9.38086	0.0213553
0000001101101011	9.71406	9.83982	9.77694	0.0628816	7.95796	8.07112	8.01454	0.056583	9.59246	9.70857	9.65052	0.0580531
0000001101101100	9.68648	9.81639	9.75144	0.0649519	7.91663	7.52112	7.71887	0.197753	9.58905	9.5633	9.57618	0.012876
0000001101101101	9.72764	9.86597	9.79681	0.0691652	7.84118	7.54439	7.69278	0.148395	9.65624	9.58554	9.62089	0.0353516
0000001101101110	9.74585	9.69488	9.72037	0.0254826	7.79514	7.72538	7.76026	0.0348778	9.42325	9.35462	9.38893	0.0343166
0000001101101111	9.8216	9.78003	9.80081	0.0207827	8.00058	7.93025	7.96541	0.0351649	9.67289	9.60977	9.64133	0.0315573
0000001101110000	9.71547	9.80633	9.7609	0.0454326	7.7126	7.77474	7.74367	0.031069	9.58853	9.56184	9.57519	0.0133453
0000001101110001	9.76169	9.74513	9.75341	0.00828128	7.88474	8.13113	8.00793	0.123198	9.6281	9.66577	9.64693	0.0188353
0000001101110010	9.62192	9.68535	9.65363	0.0317156	7.40895	7.50923	7.45909	0.0501403	9.39596	9.3986	9.39728	0.0013198
0000001101110011	9.78546	9.84734	9.8164	0.0309423	8.15254	8.31747	8.23501	0.0824656	9.6029	9.59585	9.59938	0.00352525
0000001101110100	9.73172	9.84906	9.79039	0.0586695	7.60506	7.84984	7.72745	0.122386	9.59308	9.59985	9.59647	0.0033849
0000001101110101	9.72365	9.81213	9.76789	0.044242	7.95934	7.98626	7.9728	0.0134583	9.7088	9.55414	9.63147	0.077333
0000001101110110	9.57388	9.70542	9.63965	0.0657718	7.66805	7.62191	7.64498	0.023072	9.45242	9.39011	9.42127	0.0311547
0000001101110111	9.78672	9.84428	9.8155	0.0287787	8.23022	8.28393	8.25707	0.0268536	9.59097	9.57583	9.5834	0.00757036
0000001101111000	9.68281	9.66518	9.67399	0.00881531	7.60004	7.55295	7.57649	0.0235434	9.47513	9.49754	9.48633	0.0112035
0000001101111001	9.78347	9.86955	9.82651	0.0430405	7.99334	7.87664	7.93499	0.0583491	9.55559	9.64198	9.59879	0.043195
0000001101111010	9.60545	9.66276	9.6341	0.0286538	7.65358	7.52274	7.58816	0.06542	9.43864	9.39716	9.4179	0.0207396
0000001101111011	9.74578	9.74472	9.74525	0.00053306	8.13754	8.18333	8.16044	0.0228936	9.6728	9.71071	9.69175	0.0189534
0000001101111100	9.7097	9.83916	9.77443	0.0647312	7.76038	7.75962	7.76	0.000383829	9.46722	9.49146	9.47934	0.0121161
0000001101111101	9.76587	9.89344	9.82965	0.0637863	7.77432	7.757	7.76566	0.0086648	9.68426	9.60455	9.64441	0.0398556
0000001101111110	9.56361	9.77077	9.66719	0.103577	7.64928	7.70074	7.67501	0.0257316	9.49688	9.57089	9.53389	0.0370031
0000001101111111	9.76692	9.6704	9.71866	0.0482595	8.39261	8.19122	8.29191	0.100692	9.56042	9.70847	9.63444	0.0740272
0000001110000000	8.91963	8.88132	8.90047	0.0191594	6	6	6	0	6	6	6	0
0000001110000001	9.00014	9.00799	9.00406	0.00392227	6	6	6	0
0000001110000010	8.81852	8.83086	8.82469	0.00616754	6	6	6	0	6	6	6	0
0000001110000011	8.9406	8.92587	8.93323	0.00736287	6	6	6	0	7.4764	7.88215	7.67927	0.202874
0000001110000100	8.99015	9.01759	9.00387	0.0137171	6	6	6	0	6	6	6	0
0000001110000101	8.9887	8.92949	8.9591	0.0296066	6	6	6	0	6	6.4686	6.2343	0.234301
0000001110000110	8.84303	8.77088	8.80696	0.036072	6	6	6	0	6	6	6	0
0000001110000111	9.02259	9.04603	9.03431	0.0117185	6	6	6	0	6	6.95281	6.47641	0.476407
0000001110001000	8.98906	8.95378	8.97142	0.0176406	6	6	6	0	6	6	6	0
0000001110001001	8.94673	8.98351	8.96512	0.0183933	6	6	6	0
0000001110001010	8.87937	8.8575	8.86844	0.010938	6	6	6	0	6	6	6	0
0000001110001011	8.9802	8.99973	8.98996	0.00976343	6	6	6	0
0000001110001100	9.01053	8.99568	9.0031	0.00742712	6	6	6	0	6	6	6	0
0000001110001101	8.96261	8.90613	8.93437	0.0282382	6	6	6	0	6	6	6	0
0000001110001110	8.85008	8.86911	8.85959	0.00951601	6	6	6	0	6	6	6	0
0000001110001111	8.97199	9.01686	8.99442	0.022434	6	6	6	0	6	6.90254	6.45127	0.451271
0000001110010000	8.86399	8.87856	8.87128	0.00728415	6	6	6	0	6	6	6	0
0000001110010001	8.9761	8.91256	8.94433	0.0317692	6	6	6	0	6		6	0
0000001110010010	8.76527	8.75937	8.76232	0.00295023	6	6	6	0	6	6	6	0
0000001110010011	9.00089	8.92577	8.96333	0.0375599	6	6	6	0	6	6	6	0
0000001110010100	8.919	8.9018	8.9104	0.00859977	6	6	6	0	6	6	6	0
0000001110010101	8.91734	8.9687	8.94302	0.0256827	6	6	6	0	6	6	6	0
0000001110010110	8.79136	8.8161	8.80373	0.0123687	6	6	6	0	6	6	6	0
0000001110010111	8.97247	8.88974	8.93111	0.0413659	6	6	6	0	6	6	6	0
0000001110011000	8.88655	8.87811	8.88233	0.00422134	6	6	6	0	6	6	6	0
0000001110011001	8.97919	8.9414	8.9603	0.0188939	6	6	6	0	6	6	6	0
0000001110011010	8.96194	8.79929	8.88061	0.081322	6	6	6	0	6	6	6	0
0000001110011011	8.99151	8.93856	8.96504	0.0264735	6.01027	6	6.00513	0.00513484	6	6	6	0
0000001110011100	8.9639	8.83595	8.89992	0.0639747	6	6	6	0	6	6	6	0
0000001110011101	9.08713	8.97119	9.02916	0.0579732	6	6	6	0	6	6	6	0
0000001110011110	8.88624	8.79383	8.84004	0.046202	6	6	6	0	6	6	6	0
0000001110011111	8.96757	8.88583	8.9267	0.0408684	6	6	6	0	6	6	6	0
0000001110100000	9.56369	9.55696	9.56033	0.00336899	6.43713	7.10392	6.77053	0.333395	9.2747	9.20139	9.23804	0.0366574
0000001110100001	9.62334	9.58179	9.60257	0.0207766	7.18382	7.36479	7.2743	0.0904843	9.2807	9.26821	9.27446	0.00624817
0000001110100010	9.38589	9.41823	9.40206	0.0161697	6.18223	6	6.09112	0.0911154	8.89422	8.77562	8.83492	0.0593008
0000001110100011	9.54294	9.68834	9.61564	0.0726977	7.49539	7.09459	7.29499	0.200399	9.42473	9.4403	9.43251	0.00778261
0000001110100100	9.63962	9.66635	9.65299	0.0133649	6.6687	6.94755	6.80813	0.139423	9.19912	9.34724	9.27318	0.0740588
0000001110100101	9.59634	9.45972	9.52803	0.0683144	6.86516	7.34307	7.10411	0.238955	9.38684	9.18516	9.286	0.100839
0000001110100110	9.41282	9.43566	9.42424	0.0114224	6.14581	6	6.0729	0.0729038	8.82452	8.90982	8.86717	0.0426521
0000001110100111	9.56118	9.66666	9.61392	0.052742	7.29586	7.44685	7.37136	0.0754974	9.35421	9.4641	9.40915	0.0549475
0000001110101000	9.58572	9.53204	9.55888	0.0268404	7.05139	7.37728	7.21433	0.162948	9.20736	9.03867	9.12301	0.0843477
0000001110101001	9.63454	9.68759	9.66107	0.0265255	6.892	7.50913	7.20057	0.308564	9.20755	9.27143	9.23949	0.0319392
0000001110101010	9.49412	9.42526	9.45969	0.034428	6.28194	6.26243	6.27219	0.00975557	8.98888	9.06913	9.029	0.0401279
0000001110101011	9.61553	9.62733	9.62143	0.00590329	7.34198	7.17762	7.2598	0.0821783	9.37686	9.48992	9.43339	0.0565281
0000001110101100	9.5277	9.46482	9.49626	0.0314388	6.81807	7.22545	7.02176	0.203686	9.28395	9.26024	9.2721	0.0118582
0000001110101101	9.62049	9.66681	9.64365	0.0231614	7.28547	7.22286	7.25417	0.0313065	9.35494	9.21611	9.28553	0.0694113
0000001110101110	9.43773	9.39671	9.41722	0.02051	6.77539	7.2215	6.99844	0.223056	9.1663	8.95412	9.06021	0.106091
0000001110101111	9.59953	9.62784	9.61369	0.0141542	7.47849	7.46864	7.47357	0.0049246	9.32631	9.19162	9.25897	0.0673443
0000001110110000	9.50647	9.5573	9.53188	0.0254184	8.00242	7.00558	7.504	0.498421	9.38509	9.34318	9.36414	0.0209538
0000001110110001	9.61763	9.60747	9.61255	0.00507926	7.10465	6.88032	6.99248	0.112166	9.39624	9.26979	9.33301	0.063224
0000001110110010	9.37228	9.32305	9.34766	0.0246138	6.3744	6	6.1872	0.187199	8.94881	9.12609	9.03745	0.0886438
0000001110110011	9.63516	9.60556	9.62036	0.0147997	7.42686	7.21916	7.32301	0.103849	9.4977	9.39731	9.44751	0.0501976
0000001110110100	9.55945	9.6483	9.60388	0.0444223	6.9965	6.68566	6.84108	0.155419	9.29788	9.26375	9.28081	0.0170646
0000001110110101	9.52542	9.63093	9.57818	0.052754	7.21329	7.14125	7.17727	0.0360194	9.34903	9.29746	9.32324	0.0257864
0000001110110110	9.34791	9.40638	9.37715	0.0292331	7.38134	6.991	7.18617	0.195171	8.98082	8.92502	8.95292	0.0278997
0000001110110111	9.61234	9.66661	9.63947	0.0271334	7.21252	7.37514	7.29383	0.0813099	9.40345	9.42315	9.4133	0.00984863
0000001110111000	9.5061	9.55731	9.53171	0.0256021	6.4217	7.05219	6.73694	0.315243	9.10366	9.15582	9.12974	0.0260798
0000001110111001	9.60419	9.61377	9.60898	0.00478921	7.27953	7.21427	7.2469	0.0326302	9.26273	9.17883	9.22078	0.0419472
0000001110111010	9.43506	9.45191	9.44349	0.00842485	6.37162	7.12265	6.74713	0.375512	8.95418	8.93529	8.94473	0.00944041
0000001110111011	9.6014	9.59798	9.59969	0.00170807	7.31164	7.33828	7.32496	0.0133229	9.28551	9.35073	9.31812	0.0326111
0000001110111100	9.57776	9.47927	9.52852	0.0492452	6.92106	7.55411	7.23758	0.316521	9.2679	9.22073	9.24431	0.0235853
0000001110111101	9.5663	9.56573	9.56601	0.000283863	7.48418	7.26966	7.37692	0.107264	9.23923	9.20163	9.22043	0.018804
0000001110111110	9.46579	9.42926	9.44753	0.0182651	6.83775	6.99094	6.91435	0.0765922	9.01269	8.9022	8.95744	0.0552474
0000001110111111	9.53018	9.58888	9.55953	0.0293474	7.83625	7.23022	7.53324	0.303013	9.37965	9.47361	9.42663	0.0469829
0000001111000000	9.22109	9.21517	9.21813	0.00295764	6	6	6	0	7.60653	7.66376	7.63515	0.0286128
0000001111000001	9.25601	9.24649	9.25125	0.00475792	6	6	6	0	7.83745	7.63284	7.73515	0.102307
0000001111000010	9.09295	9.03854	9.06574	0.027206	6	6	6	0	7.75395	7.21926	7.4866	0.267346
0000001111000011	9.34412	9.23562	9.28987	0.0542519	6	6	6	0	7.64101	7.96354	7.80227	0.161264
0000001111000100	9.18541	9.13439	9.1599	0.0255096	6	6	6	0	8.01278	7.54957	7.78117	0.231608
0000001111000101	9.23708	9.16651	9.2018	0.0352848	6	6	6	0	7.62642	7.70531	7.66586	0.0394475
0000001111000110	9.04562	8.96844	9.00703	0.0385927	6	6	6	0	7.65703	7.58527	7.62115	0.0358826
0000001111000111	9.32373	9.25872	9.29122	0.0325068	6	6	6	0	8.0083	8.07107	8.03969	0.0313859
0000001111001000	9.12472	9.17197	9.14834	0.0236278	6	6	6	0	7.6192	7.54098	7.58009	0.0391097
0000001111001001	9.26952	9.23946	9.25449	0.0150257	6	6	6	0	7.85034	7.70943	7.77989	0.0704551
0000001111001010	9.14455	9.09953	9.12204	0.0225092	6	6	6	0	7.79469	7.82714	7.81091	0.0162244
0000001111001011	9.29998	9.2518	9.27589	0.0240887	6	6	6	0	7.52713	7.67622	7.60167	0.0745443
0000001111001100	9.15873	9.2011	9.17992	0.021185	6	6	6	0	7.84095	7.95401	7.89748	0.0565331
0000001111001101	9.27443	9.16724	9.22084	0.0535952	6	6	6	0	7.7259	7.80384	7.76487	0.0389702
0000001111001110	9.09802	9.05677	9.0774	0.0206232	6	6	6	0	7.49832	7.69684	7.59758	0.0992589
0000001111001111	9.33953	9.34382	9.34167	0.00214731	6	6	6	0	8.05609	7.82935	7.94272	0.113371
0000001111010000	9.22883	9.26287	9.24585	0.0170173	6	6	6	0	7.69701	7.78537	7.74119	0.0441786
0000001111010001	9.378	9.26686	9.32243	0.0555707	6	6	6	0	7.64778	8.0602	7.85399	0.20621
0000001111010010	9.03176	8.98324	9.0075	0.0242612	6	6	6	0
0000001111010011	9.33271	9.33601	9.33436	0.00165279	6	6	6	0	7.53771	7.79071	7.66421	0.126496
0000001111010100	9.2765	9.26224	9.26937	0.00713015	6	6	6	0	7.60075	7.65221	7.62648	0.0257276
0000001111010101	9.29353	9.34039	9.31696	0.0234276	6	6	6	0	7.46322	7.59284	7.52803	0.0648097
0000001111010110	9.09431	9.07781	9.08606	0.00825283	6	6	6	0	7.60045	7.52398	7.56222	0.0382346
0000001111010111	9.3606	9.36375	9.36217	0.00157587	6	6	6	0	8.13011	7.90106	8.01558	0.114526
0000001111011000	9.2233	9.19101	9.20715	0.0161447	6	6	6	0	7.6896	7.89374	7.79167	0.102068
0000001111011001	9.42974	9.40747	9.4186	0.0111372	6	6	6	0	7.6635	7.56649	7.61499	0.0485066
0000001111011010	9.07974	9.09047	9.08511	0.00536471	6	6	6	0	7.54232	7.64805	7.59518	0.0528625
0000001111011011	9.39291	9.39213	9.39252	0.000387043	6	6	6	0	7.96632	8.02042	7.99337	0.0270526
0000001111011100	9.22172	9.20613	9.21393	0.00779477	6	6	6	0	7.34983	7.35796	7.35389	0.00406675
0000001111011101	9.41328	9.42363	9.41845	0.00517359	6	6	6	0	7.38105	7.78121	7.58113	0.200079
0000001111011110	9.05962	9.07674	9.06818	0.00855918	6	6	6	0	7.60425	7.26636	7.43531	0.168947
0000001111011111	9.39362	9.35962	9.37662	0.0169993	6	6	6	0	8.18157	8.27328	8.22743	0.0458555
0000001111100000	9.71067	9.80144	9.75606	0.0453881	7.80207	8.0116	7.90684	0.104763	9.64625	9.68118	9.66372	0.0174615
0000001111100001	9.74648	9.73866	9.74257	0.00390821	8.15569	8.22118	8.18844	0.0327445	9.6768	9.70183	9.68932	0.0125176
0000001111100010	9.68018	9.69212	9.68615	0.00596804	7.74435	7.83531	7.78983	0.0454818	9.47206	9.39338	9.43272	0.0393413
0000001111100011	9.78657	9.88803	9.8373	0.0507338	8.56221	8.46627	8.51424	0.0479732	9.69398	9.76849	9.73123	0.0372531
0000001111100100	9.74184	9.85084	9.79634	0.0544989	7.9853	8.15795	8.07163	0.0863291	9.57883	9.65258	9.61571	0.0368792
0000001111100101	9.75554	9.84226	9.7989	0.0433566	8.19755	8.141	8.16927	0.028275	9.69102	9.7054	9.69821	0.00718754
0000001111100110	9.65818	9.7464	9.70229	0.0441114	7.60715	7.84562	7.72639	0.119234	9.5342	9.48984	9.51202	0.0221819
0000001111100111	9.87041	9.79937	9.83489	0.0355188	8.30721	8.54868	8.42794	0.120733	9.63959	9.71137	9.67548	0.0358864
0000001111101000	9.67989	9.84136	9.76063	0.0807303	7.91865	7.88484	7.90175	0.0169057	9.41089	9.62337	9.51713	0.10624
0000001111101001	9.79667	9.87558	9.83612	0.0394527	8.08556	8.29054	8.18805	0.102487	9.66538	9.67229	9.66883	0.00345299
0000001111101010	9.59978	9.72998	9.66488	0.0651017	7.71455	7.76438	7.73947	0.0249154	9.51755	9.4988	9.50817	0.00937648
0000001111101011	9.78265	9.74819	9.76542	0.0172318	8.43315	8.56537	8.49926	0.0661122	9.73242	9.72463	9.72853	0.00389418
0000001111101100	9.70038	9.68492	9.69265	0.00773257	7.9239	7.95444	7.93917	0.015266	9.57429	9.51677	9.54553	0.028758
0000001111101101	9.80355	9.82336	9.81346	0.0099065	8.0771	8.14995	8.11353	0.0364231	9.66198	9.69376	9.67787	0.015891
0000001111101110	9.68695	9.80304	9.74499	0.0580447	7.61721	7.84129	7.72925	0.112038	9.46733	9.45464	9.46098	0.00634299
0000001111101111	9.8283	9.80013	9.81421	0.0140861	8.46378	8.36411	8.41394	0.049832	9.76343	9.62399	9.69371	0.0697179
0000001111110000	9.72853	9.84266	9.78559	0.0570652	8.03995	8.07377	8.05686	0.0169085	9.69687	9.59478	9.64582	0.0510449
0000001111110001	9.75236	9.8352	9.79378	0.0414204	8.35062	8.30323	8.32692	0.0236939	9.60166	9.68529	9.64347	0.0418141
0000001111110010	9.61184	9.62449	9.61816	0.00632569	7.8021	7.87931	7.8407	0.0386045	9.43848	9.45544	9.44696	0.00848049
0000001111110011	9.79429	9.89309	9.84369	0.0493999	8.47019	8.28193	8.37606	0.0941313	9.64301	9.66443	9.65372	0.0107112
0000001111110100	9.68859	9.69403	9.69131	0.00271603	8.11724	8.26155	8.1894	0.0721553	9.60423	9.70988	9.65705	0.0528249
0000001111110101	9.65895	9.77232	9.71563	0.0566829	8.31298	8.2359	8.27444	0.0385419	9.65058	9.65358	9.65208	0.00150313
0000001111110110	9.6022	9.62492	9.61356	0.0113577	7.77425	7.90368	7.83896	0.0647106	9.399	9.46555	9.43228	0.033275
0000001111110111	9.77157	9.67054	9.72106	0.0505181	8.52973	8.34588	8.4378	0.0919284	9.68657	9.67081	9.67869	0.00788254
0000001111111000	9.70856	9.66439	9.68647	0.0220876	7.67137	8.14545	7.90841	0.237044	9.43217	9.44849	9.44033	0.00815699
0000001111111001	9.84158	9.79159	9.81658	0.0249924	8.25084	8.41219	8.33152	0.0806739	9.62046	9.65895	9.63971	0.0192435
0000001111111010	9.5719	9.6303	9.6011	0.0291992	7.91348	7.86054	7.88701	0.0264713	9.5943	9.40687	9.50059	0.0937145
0000001111111011	9.75908	9.80072	9.7799	0.0208201	8.594	8.32594	8.45997	0.134033	9.71012	9.7422	9.72616	0.0160403
0000001111111100	9.74578	9.7747	9.76024	0.0144578	7.99226	7.93828	7.96527	0.0269858	9.61858	9.56342	9.591	0.0275797
0000001111111101	9.7246	9.76231	9.74346	0.0188543	8.24927	8.2258	8.23753	0.0117344	9.63526	9.63436	9.63481	0.000446609
0000001111111110	9.59197	9.67655	9.63426	0.0422879	7.93721	7.99566	7.96644	0.0292261	9.46543	9.35009	9.40776	0.0576708
0000001111111111	9.74982	9.76138	9.7556	0.00577797	8.44021	8.47494	8.45758	0.017362	9.62753	9.62458	9.62606	0.00147636
0000010000000000	8.65925	8.59352	8.62639	0.0328671	6	6	6	0	6	6	6	0
0000010000000001	8.68096	8.50715	8.59405	0.0869052	6	6	6	0	6	6	6	0
0000010000000010	8.45196	8.16402	8.30799	0.143972	6	6	6	0	6	6	6	0
0000010000000011	8.51006	8.50617	8.50812	0.00194309	6	6	6	0	6	6	6	0
0000010000000100	8.52623	8.49367	8.50995	0.0162819	6	6	6	0	6	6	6	0
0000010000000101	8.61712	8.55984	8.58848	0.02864	6	6	6	0	6	6	6	0
0000010000000110	8.43325	8.46859	8.45092	0.0176681	6	6	6	0	6	6	6	0
0000010000000111	8.61843	8.48022	8.54932	0.069102	6	6	6	0	6	6	6	0
0000010000001000	8.64352	8.57266	8.60809	0.0354321	6	6	6	0	6	6	6	0
0000010000001001	8.608	8.53007	8.56904	0.0389659	6	6	6	0	6	6	6	0
0000010000001010	8.61448	8.49592	8.5552	0.0592783	6	6	6	0	6	6	6	0
0000010000001011	8.57092	8.52232	8.54662	0.0242979	6	6	6	0	6	6	6	0
0000010000001100	8.67139	8.64099	8.65619	0.0152016	6	6	6	0	6	6	6	0
0000010000001101	8.73735	8.60026	8.6688	0.0685488	6	6	6	0	6	6	6	0
0000010000001110	8.52213	8.55495	8.53854	0.0164088	6	6	6	0	6	6	6	0
0000010000001111	8.65844	8.57169	8.61506	0.0433754	6	6	6	0	6	6	6	0
0000010000010000	8.59021	8.47375	8.53198	0.0582301	6	6	6	0	6	6	6	0
0000010000010001	8.69387	8.55799	8.62593	0.0679374	6	6	6	0	6	6	6	0
0000010000010010	8.44095	8.31541	8.37818	0.0627699	6	6	6	0	6	6	6	0
0000010000010011	8.55722	8.52649	8.54185	0.0153627	6	6	6	0	6	6	6	0
0000010000010100	8.53855	8.5378	8.53818	0.000371683	6	6	6	0	6	6	6	0
0000010000010101	8.56844	8.47112	8.51978	0.0486596	6	6	6	0	6	6	6	0
0000010000010110	8.37897	8.24187	8.31042	0.0685481	6	6	6	0	6	6	6	0
0000010000010111	8.56209	8.5753	8.5687	0.0066057	6	6	6	0	6	6	6	0
0000010000011000	8.64839	8.4967	8.57255	0.0758494	6	6	6	0	6	6	6	0
0000010000011001	8.59057	8.53847	8.56452	0.0260488	6	6	6	0	6	6	6	0
0000010000011010	8.51744	8.21866	8.36805	0.14939	6	6	6	0	6	6	6	0
0000010000011011	8.56866	8.51715	8.54291	0.0257561	6	6	6	0	6	6	6	0
0000010000011100	8.52345	8.43696	8.48021	0.0432468	6	6	6	0	6	6	6	0
0000010000011101	8.58803	8.55932	8.57368	0.014356	6	6	6	0	6	6	6	0
0000010000011110	8.48694	8.53822	8.51258	0.0256355	6	6	6	0	6	6	6	0
0000010000011111	8.55886	8.54439	8.55162	0.00723778	6	6	6	0	6	6	6	0
0000010000100000	8.96472	9.09015	9.02743	0.0627152	6	6	6	0	7.41475	7.4856	7.45018	0.0354257
0000010000100001	9.04992	9.06129	9.0556	0.00568436	6	6	6	0	7.27053	7.48481	7.37767	0.107139
0000010000100010	8.85728	8.91382	8.88555	0.0282698	6	6	6	0
0000010000100011	9.08146	9.00412	9.04279	0.0386711	6	6	6	0	7.21818	7.68133	7.44975	0.231573
0000010000100100	8.9709	8.98961	8.98025	0.00935526	6	6	6	0
0000010000100101	9.02166	8.99175	9.0067	0.0149563	6	6	6	0	7.15545	7.51285	7.33415	0.1787
0000010000100110	8.89401	8.8763	8.88516	0.00885236	6	6	6	0	7.20186	7.93284	7.56735	0.365487
0000010000100111	9.0372	9.05836	9.04778	0.0105772	6.46108	6.28068	6.37088	0.0901982
0000010000101000	9.01735	8.97365	8.9955	0.0218514	6	6	6	0	7.56703	7.3983	7.48267	0.0843654
0000010000101001	9.10475	9.05625	9.0805	0.0242477	6	6	6	0	7.75452	7.79332	7.77392	0.0193994
0000010000101010	8.89582	8.91986	8.90784	0.0120212	6	6	6	0
0000010000101011	9.06694	9.05764	9.06229	0.00464813	6	6	6	0	7.31788	7.485	7.40144	0.0835594
0000010000101100	9.06001	8.99905	9.02953	0.0304816	6	6	6	0	7.45752	7.65239	7.55496	0.0974353
0000010000101101	9.0717	8.98046	9.02608	0.0456166	6	6	6	0	7.62572	7.86897	7.74735	0.121628
0000010000101110	8.92291	8.91369	8.9183	0.00460781	6	6	6	0	6	6	6	0
0000010000101111	9.16515	9.03599	9.10057	0.064578	6.69217	6.14683	6.4195	0.27267	7.67957	7.81814	7.74885	0.0692839
0000010000110000	9.00016	8.99583	8.998	0.00216216	6	6	6	0	7.98544	7.84152	7.91348	0.0719589
0000010000110001	9.12391	9.06059	9.09225	0.0316599	6.47779	6	6.2389	0.238896	7.80679	7.68396	7.74537	0.0614144
0000010000110010	8.85153	8.89146	8.8715	0.0199681	6	6	6	0	7.347	7.47545	7.41122	0.0642246
0000010000110011	9.06882	9.11432	9.09157	0.0227484					7.69585	7.48036	7.5881	0.107746
0000010000110100	9.07819	9.03071	9.05445	0.0237382		6	6	0	7.42262	7.42462	7.42362	0.00100124
0000010000110101	9.057	9.04156	9.04928	0.00771982	6		6	0	7.86072	7.86071	7.86071	4.70209e-06
0000010000110110	8.88741	8.85549	8.87145	0.0159605	6	6	6	0	7.38394	7.01305	7.19849	0.185442
0000010000110111	9.11835	9.09935	9.10885	0.00950327	6.02794	6	6.01397	0.013969	7.78733	7.67538	7.73136	0.0559759
0000010000111000	9.0163	9.05336	9.03483	0.0185264	6	6	6	0	7.61601	7.22812	7.42206	0.193943
0000010000111001	9.0768	9.04563	9.06121	0.0155847	6	6.07785	6.03893	0.0389253	7.95902	7.85538	7.9072	0.0518223
0000010000111010	8.93139	8.85391	8.89265	0.0387402	6	6	6	0	7.51651	7.34417	7.43034	0.0861713
0000010000111011	9.14575	9.14122	9.14349	0.00226387	6	6.66382	6.33191	0.33191	7.71899	7.61376	7.66637	0.0526145
0000010000111100	9.05997	9.08604	9.07301	0.0130335	6	6	6	0	7.62593	7.78806	7.70699	0.0810628
0000010000111101	9.12752	8.96301	9.04527	0.0822528	6	6	6	0	7.40596	7.72614	7.56605	0.16009
0000010000111110	8.93703	8.91592	8.92647	0.0105565					7.33835	7.57052	7.45444	0.116087
0000010000111111	9.09475	9.01279	9.05377	0.0409809	6.26652	6.21356	6.24004	0.0264789	7.85055	7.74453	7.79754	0.0530123
0000010001000000	8.75495	8.73277	8.74386	0.0110909	6	6	6	0	6	6	6	0
0000010001000001	8.77464	8.68518	8.72991	0.0447317	6	6	6	0	6	6	6	0
0000010001000010	8.66064	8.502	8.58132	0.0793214	6	6	6	0	6	6	6	0
0000010001000011	8.68412	8.63188	8.658	0.0261195	6	6	6	0	6	6	6	0
0000010001000100	8.74755	8.70457	8.72606	0.0214902	6	6	6	0	6	6	6	0
0000010001000101	8.72441	8.65769	8.69105	0.0333588	6	6	6	0	6	6	6	0
0000010001000110	8.61915	8.58439	8.60177	0.0173772	6	6	6	0	6	6	6	0
0000010001000111	8.71154	8.63834	8.67494	0.0365973	6	6	6	0	6	6	6	0
0000010001001000	8.75842	8.75463	8.75653	0.00189652	6	6	6	0	6	6	6	0
0000010001001001	8.78683	8.71555	8.75119	0.03564	6	6	6	0	6	6	6	0
0000010001001010	8.72014	8.71031	8.71522	0.0049182	6	6	6	0	6	6	6	0
0000010001001011	8.744	8.71511	8.72956	0.014447	6	6	6	0	6	6	6	0
0000010001001100	8.77075	8.6826	8.72668	0.0440791	6	6	6	0	6	6	6	0
0000010001001101	8.78459	8.69891	8.74175	0.0428408	6	6	6	0	6	6	6	0
0000010001001110	8.68429	8.57331	8.6288	0.0554922	6	6	6	0	6	6	6	0
0000010001001111	8.70386	8.63836	8.67111	0.0327504	6	6	6	0	6	6	6	0
0000010001010000	8.69363	8.66044	8.67704	0.0165935	6	6	6	0	6	6	6	0
0000010001010001	8.80035	8.75177	8.77606	0.0242884	6	6	6	0	6	6	6	0
0000010001010010	8.61517	8.55787	8.58652	0.0286519	6	6	6	0	6	6	6	0
0000010001010011	8.63601	8.62694	8.63148	0.0045359	6	6	6	0	6	6	6	0
0000010001010100	8.76488	8.69524	8.73006	0.0348238	6	6	6	0	6	6	6	0
0000010001010101	8.7609	8.67949	8.7202	0.0407089	6	6	6	0	6	6	6	0
0000010001010110	8.62759	8.52246	8.57503	0.0525639	6	6	6	0	6	6	6	0
0000010001010111	8.72844	8.71603	8.72223	0.00620644	6	6	6	0	6	6	6	0
0000010001011000	8.76329	8.7063	8.73479	0.0284938	6	6	6	0	6	6	6	0
0000010001011001	8.79312	8.67027	8.7317	0.0614267	6	6	6	0	6	6	6	0
0000010001011010	8.64419	8.52322	8.58371	0.0604887	6	6	6	0	6	6	6	0
0000010001011011	8.73861	8.65678	8.69769	0.0409166	6	6	6	0	6	6	6	0
0000010001011100	8.79844	8.75617	8.7773	0.021136	6	6	6	0	6	6	6	0
0000010001011101	8.78686	8.69083	8.73885	0.0480169	6	6	6	0	6	6	6	0
0000010001011110	8.68884	8.61082	8.64983	0.0390106	6	6	6	0	6	6	6	0
0000010001011111	8.69773	8.64318	8.67045	0.027277	6	6	6	0	6	6	6	0
0000010001100000	9.17151	9.15462	9.16307	0.00844623	6	6	6	0	8.13474	7.89466	8.0147	0.120044
0000010001100001	9.16975	9.13767	9.15371	0.0160377	6	6	6	0	8.0714	8.32498	8.19819	0.126792
0000010001100010	9.07149	9.10031	9.0859	0.0144086	6	6	6	0	8.10494	7.91975	8.01235	0.0925937
0000010001100011	9.24779	9.20971	9.22875	0.0190378	6.2119	6.03942	6.12566	0.0862404	8.2732	8.69068	8.48194	0.208742
0000010001100100	9.1648	9.16536	9.16508	0.000280729	6	6	6	0	8.12363	8.15301	8.13832	0.0146916
0000010001100101	9.11227	9.09486	9.10357	0.00870216	6	6	6	0	7.95935	8.20745	8.0834	0.12405
0000010001100110	9.08191	9.03349	9.0577	0.0242113	6	6	6	0	8.01341	7.80347	7.90844	0.104966
0000010001100111	9.21871	9.15338	9.18605	0.0326633	6.30344	6	6.15172	0.151721	8.61839	8.14412	8.38125	0.237136
0000010001101000	9.20606	9.11263	9.15934	0.0467127	6	6	6	0	8.0037	7.86112	7.93241	0.0712865
0000010001101001	9.17884	9.13391	9.15638	0.0224637	6	6	6	0	7.91258	7.98561	7.94909	0.0365143
0000010001101010	9.13302	9.15224	9.14263	0.00960901	6	6	6	0	7.89542	7.6093	7.75236	0.143057
0000010001101011	9.22731	9.19902	9.21317	0.014149	6	6.19488	6.09744	0.0974391	8.43596	8.25892	8.34744	0.0885218
0000010001101100	9.19271	9.21051	9.20161	0.00890433	6	6	6	0	7.8996	7.80255	7.85107	0.0485213
0000010001101101	9.159	9.25537	9.20718	0.0481865	6	6	6	0	7.74841	8.23706	7.99274	0.244327
0000010001101110	9.12118	9.15298	9.13708	0.0158986	6	6	6	0	8.20641	8.27675	8.24158	0.0351706
0000010001101111	9.25372	9.24739	9.25055	0.00316725					8.51155	8.39393	8.45274	0.0588121
0000010001110000	9.13682	9.12994	9.13338	0.00343788	6	6	6	0	8.59012	8.16519	8.37765	0.212467
0000010001110001	9.19624	9.20796	9.2021	0.00586017	6.18661	7.15685	6.67173	0.485122	8.43231	8.39612	8.41421	0.0180975
0000010001110010	9.01841	9.04198	9.0302	0.0117845	6	6	6	0	8.39294	8.23544	8.31419	0.0787526
0000010001110011	9.26563	9.28745	9.27654	0.0109141	6.03299	6.91726	6.47512	0.442138	8.70054	8.58915	8.64484	0.0556929
0000010001110100	9.17882	9.19248	9.18565	0.00683184	6	6	6	0	8.52304	8.46232	8.49268	0.0303601
0000010001110101	9.21889	9.09774	9.15831	0.0605756	6.59823	6	6.29912	0.299115	8.61447	8.34207	8.47827	0.136199
0000010001110110	9.01558	9.04919	9.03239	0.016804		6	6	0	8.02914	8.03942	8.03428	0.00513848
0000010001110111	9.24992	9.08261	9.16627	0.0836514	6.29835	6.67495	6.48665	0.1883	8.46872	8.50772	8.48822	0.0195015
0000010001111000	9.19525	9.24681	9.22103	0.0257816	6.50472	6	6.25236	0.252361	8.18814	8.33068	8.25941	0.0712738
0000010001111001	9.24449	9.27524	9.25986	0.0153782	6.42298	6.41457	6.41877	0.00420208	8.54221	8.31205	8.42713	0.115082
0000010001111010	9.08189	9.11636	9.09912	0.0172351	6	6	6	0	7.83265	7.9941	7.91337	0.0807276
0000010001111011	9.3387	9.24071	9.28971	0.0489937	6.02977	6.58149	6.30563	0.275862	8.56258	8.53487	8.54872	0.0138558
0000010001111100	9.24144	9.2003	9.22087	0.0205692	6.07377	6.1455	6.10963	0.0358631	8.19293	8.3599	8.27641	0.0834832
0000010001111101	9.32424	9.26247	9.29335	0.0308877	6.22584	6.99683	6.61134	0.385497	8.68296	8.63114	8.65705	0.0259083
0000010001111110	9.12067	9.07962	9.10015	0.0205249	6.5266	7.07074	6.79867	0.27207	8.44626	8.13571	8.29099	0.155273
0000010001111111	9.27137	9.32158	9.29648	0.0251074					8.50824	8.50559	8.50691	0.00132655
0000010010000000	8.65911	8.65044	8.65478	0.004334	6	6	6	0	6	6	6	0
0000010010000001	8.60337	8.6243	8.61384	0.0104623	6	6	6	0	6	6	6	0
0000010010000010	8.50735	8.45425	8.4808	0.0265486	6	6	6	0	6	6	6	0
0000010010000011	8.65009	8.61298	8.63154	0.0185548	6	6	6	0	6	6	6	0
0000010010000100	8.61478	8.65992	8.63735	0.0225676	6	6	6	0	6	6	6	0
0000010010000101	8.63128	8.61573	8.6235	0.00777535	6	6	6	0	6	6	6	0
0000010010000110	8.52553	8.46819	8.49686	0.0286682	6	6	6	0	6	6	6	0
0000010010000111	8.6612	8.53906	8.60013	0.0610694	6	6	6	0	6	6	6	0
0000010010001000	8.65378	8.57313	8.61346	0.0403268	6	6	6	0	6	6	6	0
0000010010001001	8.66108	8.65434	8.65771	0.00337278	6	6	6	0	6	6	6	0
0000010010001010	8.58173	8.54169	8.56171	0.0200163	6	6	6	0	6	6	6	0
0000010010001011	8.62842	8.64757	8.63799	0.0095731	6	6	6	0	6	6	6	0
0000010010001100	8.70333	8.63953	8.67143	0.031899	6	6	6	0	6	6	6	0
0000010010001101	8.69378	8.55007	8.62193	0.0718517	6	6	6	0	6	6	6	0
0000010010001110	8.58859	8.57981	8.5842	0.00439157	6	6	6	0	6	6	6	0
0000010010001111	8.66298	8.64931	8.65614	0.00683607	6	6	6	0	6	6	6	0
0000010010010000	8.60776	8.52912	8.56844	0.039321	6	6	6	0	6	6	6	0
0000010010010001	8.58632	8.58535	8.58584	0.000487956	6	6	6	0	6	6	6	0
0000010010010010	8.44702	8.40939	8.42821	0.018817	6	6	6	0	6	6	6	0
0000010010010011	8.5432	8.55485	8.54903	0.00582745	6	6	6	0	6	6	6	0
0000010010010100	8.58503	8.45841	8.52172	0.0633091	6	6	6	0	6	6	6	0
0000010010010101	8.57216	8.56881	8.57048	0.00167589	6	6	6	0	6	6	6	0
0000010010010110	8.44643	8.447	8.44671	0.000284352	6	6	6	0	6	6	6	0
0000010010010111	8.57282	8.60004	8.58643	0.0136112	6	6	6	0	6	6	6	0
0000010010011000	8.57393	8.5222	8.54806	0.0258637	6	6	6	0	6	6	6	0
0000010010011001	8.74038	8.55833	8.64936	0.0910263	6	6	6	0	6	6	6	0
0000010010011010	8.50244	8.45673	8.47958	0.0228555	6	6	6	0	6	6	6	0
0000010010011011	8.74368	8.59238	8.66803	0.0756487	6	6	6	0	6	6	6	0
0000010010011100	8.61932	8.59757	8.60844	0.0108738	6	6	6	0	6	6	6	0
0000010010011101	8.5808	8.63302	8.60691	0.0261147	6	6	6	0	6	6	6	0
0000010010011110	8.51404	8.49301	8.50352	0.0105175	6	6	6	0	6	6	6	0
0000010010011111	8.57506	8.61264	8.59385	0.0187856	6	6	6	0	6	6	6	0
0000010010100000	8.9483	8.8492	8.89875	0.049552	6	6	6	0	7.5119	7.41744	7.46467	0.0472274
0000010010100001	9.05933	8.97979	9.01956	0.0397663	6	6	6	0	7.3841	7.64414	7.51412	0.130018
0000010010100010	8.83085	8.83011	8.83048	0.000370673	6	6	6	0	7.48063	7.68174	7.58118	0.100555
0000010010100011	9.04527	8.97666	9.01097	0.0343049		6.07902	6.07902	0	7.80378	7.89505	7.84941	0.0456313
0000010010100100	9.02345	9.06192	9.04268	0.0192368	6	6	6	0	7.80211	7.50902	7.65556	0.146545
0000010010100101	8.97086	8.94218	8.95652	0.0143394	6	6	6	0	7.26382	7.47	7.36691	0.103092
0000010010100110	8.81771	8.74453	8.78112	0.0365882	6	6	6	0	7.09636	7.15289	7.12463	0.0282656
0000010010100111	9.04936	9.08848	9.06892	0.0195635	6	6.01267	6.00633	0.00633317	7.3888	7.54273	7.46576	0.0769682
0000010010101000	9.01852	8.9104	8.96446	0.0540595	6	6	6	0	7.09357	7.57565	7.33461	0.241041
0000010010101001	9.03836	9.04044	9.0394	0.00104095	6	6.35482	6.17741	0.177412	7.39396	7.84778	7.62087	0.22691
0000010010101010	8.92081	8.8725	8.89665	0.0241576	6	6	6	0
0000010010101011	9.0422	8.99296	9.01758	0.0246193	6	6.17862	6.08931	0.0893107	7.96951	7.77818	7.87385	0.095662
0000010010101100	9.0235	8.99052	9.00701	0.016494	6	6	6	0	6.97773	7.19258	7.08515	0.107426
0000010010101101	9.07774	9.04803	9.06288	0.0148565	6	6	6	0	7.44205	8.0204	7.73123	0.289172
0000010010101110	8.85672	8.93302	8.89487	0.0381534	6	6	6	0	7.42055	7.83988	7.63022	0.209665
0000010010101111	9.05901	9.03419	9.0466	0.0124098	6	6	6	0	7.665	7.76577	7.71539	0.0503827
0000010010110000	9.02713	8.97951	9.00332	0.0238095	6	6	6	0	7.56494	7.85858	7.71176	0.146815
0000010010110001	9.06697	9.00712	9.03705	0.0299239	6	6.36534	6.18267	0.182671	7.74312	7.82622	7.78467	0.0415529
0000010010110010	8.88071	8.82423	8.85247	0.0282414	6	6	6	0	7.68509	7.70047	7.69278	0.00769074
0000010010110011	9.05049	9.09368	9.07209	0.0215932	6.18843	6.57454	6.38149	0.193057	7.99497	7.83988	7.91743	0.0775444
0000010010110100	8.97886	8.93598	8.95742	0.0214394	6	6	6	0	7.72467	7.7224	7.72353	0.00113264
0000010010110101	9.06499	9.02613	9.04556	0.0194288	6	6	6	0	7.73898	7.83316	7.78607	0.0470916
0000010010110110	8.8282	8.8675	8.84785	0.0196504	6	6	6	0	7.83628	7.32054	7.57841	0.257867
0000010010110111	9.08513	9.03329	9.05921	0.0259197					7.9018	7.96467	7.93324	0.0314362
0000010010111000	8.99771	8.90433	8.95102	0.0466906	6	6	6	0	7.87559	7.53941	7.7075	0.168088
0000010010111001	9.10145	9.05442	9.07793	0.0235155	6.30715	7.28546	6.79631	0.489157	8.37368	7.84733	8.11051	0.263173
0000010010111010	8.90642	8.97632	8.94137	0.0349506	6	6	6	0	7.75094	8.12435	7.93764	0.186704
0000010010111011	9.14597	9.07689	9.11143	0.0345399	6.22607	6.47919	6.35263	0.126563	8.04247	7.91516	7.97881	0.0636592
0000010010111100	9.01336	9.05073	9.03205	0.0186855	6.20517	6	6.10258	0.102584	7.87078	7.83442	7.8526	0.0181778
0000010010111101	9.07894	9.05917	9.06905	0.00988608	6.18051	6.58647	6.38349	0.202978	8.09501	7.73129	7.91315	0.181864
0000010010111110	8.91751	8.8246	8.87106	0.0464542	6	6	6	0	7.51004	7.5223	7.51617	0.00613006
0000010010111111	9.1409	9.127	9.13395	0.00695048	6	6.03209	6.01605	0.0160459	7.60668	7.64014	7.62341	0.0167325
0000010011000000	8.82622	8.69587	8.76105	0.065176	6	6	6	0	6	6	6	0
0000010011000001	8.80981	8.68973	8.74977	0.0600424	6	6	6	0	6	6	6	0
0000010011000010	8.63229	8.53319	8.58274	0.0495495	6	6	6	0	6	6	6	0
0000010011000011	8.75428	8.70332	8.7288	0.0254843	6	6	6	0	6	6	6	0
0000010011000100	8.82428	8.71543	8.76985	0.0544284	6	6	6	0	6	6	6	0
0000010011000101	8.73972	8.72916	8.73444	0.00527849	6	6	6	0	6	6	6	0
0000010011000110	8.65227	8.65218	8.65222	4.37977e-05	6	6	6	0	6	6	6	0
0000010011000111	8.71701	8.67105	8.69403	0.0229783	6	6	6	0	6	6	6	0
0000010011001000	8.77344	8.81747	8.79546	0.022011	6	6	6	0	6	6	6	0
0000010011001001	8.81664	8.81506	8.81585	0.000789735	6	6	6	0	6	6	6	0
0000010011001010	8.7416	8.60666	8.67413	0.0674676	6	6	6	0	6	6	6	0
0000010011001011	8.74891	8.77129	8.7601	0.0111892	6	6	6	0	6	6	6	0
0000010011001100	8.82185	8.77759	8.79972	0.0221305	6	6	6	0	6	6	6	0
0000010011001101	8.83278	8.77126	8.80202	0.0307639	6	6	6	0	6	6	6	0
0000010011001110	8.72011	8.6662	8.69316	0.026952	6	6	6	0	6	6	6	0
0000010011001111	8.73401	8.78453	8.75927	0.0252607	6	6	6	0	6	6	6	0
0000010011010000	8.71778	8.69212	8.70495	0.012833	6	6	6	0	6	6	6	0
0000010011010001	8.75635	8.75191	8.75413	0.00222057	6	6	6	0	6	6	6	0
0000010011010010	8.63594	8.59101	8.61348	0.022469	6	6	6	0	6	6	6	0
0000010011010011	8.73499	8.76922	8.7521	0.0171162	6	6	6	0	6	6	6	0
0000010011010100	8.74705	8.67187	8.70946	0.0375921	6	6	6	0	6	6	6	0
0000010011010101	8.72529	8.71464	8.71996	0.00532668	6	6	6	0	6	6	6	0
0000010011010110	8.57647	8.50246	8.53947	0.0370043	6	6	6	0	6	6	6	0
0000010011010111	8.73341	8.69252	8.71296	0.0204432	6	6	6	0	6	6	6	0
0000010011011000	8.80453	8.78341	8.79397	0.0105604	6	6	6	0	6	6	6	0
0000010011011001	8.78044	8.79026	8.78535	0.00491199	6	6	6	0	6	6	6	0
0000010011011010	8.56637	8.57167	8.56902	0.00265231	6	6	6	0	6	6	6	0
0000010011011011	8.74537	8.75607	8.75072	0.00534828	6	6	6	0	6	6	6	0
0000010011011100	8.74461	8.71122	8.72791	0.0166957	6	6	6	0	6	6	6	0
0000010011011101	8.80556	8.77954	8.79255	0.0130106	6	6	6	0	6	6	6	0
0000010011011110	8.70895	8.59668	8.65281	0.0561362	6	6	6	0	6	6	6	0
0000010011011111	8.78391	8.82876	8.80634	0.0224248	6	6	6	0	6	6	6	0
0000010011100000	9.23939	9.24257	9.24098	0.00159378					8.38958	8.52007	8.45482	0.0652413
0000010011100001	9.30703	9.3453	9.32617	0.0191318	7.4791	7.86774	7.67342	0.194324	8.45308	8.63792	8.5455	0.0924172
0000010011100010	9.17782	9.10924	9.14353	0.0342934	6	6.12046	6.06023	0.0602312	8.32663	8.45653	8.39158	0.0649469
0000010011100011	9.38921	9.41824	9.40373	0.0145195	7.24898	7.34421	7.29659	0.0476177	8.76635	8.93695	8.85165	0.0852983
0000010011100100	9.36077	9.32435	9.34256	0.0182078	7.17386	7.61465	7.39426	0.220391	8.65004	8.71409	8.68207	0.032027
0000010011100101	9.33367	9.35825	9.34596	0.0122897	7.27361	7.29341	7.28351	0.00989903	8.72252	8.79986	8.76119	0.038673
0000010011100110	9.17353	9.18524	9.17938	0.00585476	7.01773	7.63932	7.32853	0.310793	8.1695	8.35487	8.26219	0.0926824
0000010011100111	9.40151	9.41747	9.40949	0.00798094	7.71332	7.66402	7.68867	0.0246489	8.98976	8.9766	8.98318	0.00658363
0000010011101000	9.23302	9.2046	9.21881	0.0142123	6.59924	6.15544	6.37734	0.2219	8.51873	8.55812	8.53842	0.019695
0000010011101001	9.39891	9.3608	9.37985	0.0190505	7.61124	7.58621	7.59872	0.0125159	8.87062	8.92479	8.8977	0.0270812
0000010011101010	9.18991	9.24834	9.21912	0.0292163	6	6.79596	6.39798	0.397979	8.20527	8.41993	8.3126	0.107328
0000010011101011	9.45291	9.44051	9.44671	0.00619965	7.46445	7.58781	7.52613	0.0616807	8.79828	8.70759	8.75294	0.0453454
0000010011101100	9.27133	9.38535	9.32834	0.0570083	7.79448	7.21389	7.50419	0.290293	8.62406	8.61439	8.61923	0.00483697
0000010011101101	9.31882	9.30088	9.30985	0.00897233	6.28452	7.28119	6.78285	0.498335	8.74244	8.66115	8.70179	0.040644
0000010011101110	9.20871	9.20665	9.20768	0.00102864	7.82206	7.74462	7.78334	0.0387181	8.24413	8.39279	8.31846	0.0743346
0000010011101111	9.44023	9.42599	9.43311	0.0071187	7.89966	7.99361	7.94664	0.0469787	8.85594	8.69522	8.77558	0.0803635
0000010011110000	9.26881	9.28152	9.27516	0.00635338	7.41636	6.62602	7.02119	0.395169	8.63713	8.648	8.64257	0.0054357
0000010011110001	9.2794	9.30634	9.29287	0.0134697	6.60426	7.31252	6.95839	0.354131	8.84842	8.95518	8.9018	0.0533827
0000010011110010	9.11849	9.05154	9.08502	0.0334764	6	6	6	0	8.25694	7.95699	8.10697	0.149975
0000010011110011	9.3637	9.3761	9.3699	0.00620042	7.69767	7.51074	7.6042	0.0934646	8.92823	8.90649	8.91736	0.0108672
0000010011110100	9.28835	9.26926	9.27881	0.00954717	6.4216	7.20672	6.81416	0.39256	8.80937	8.51863	8.664	0.145373
0000010011110101	9.426	9.34691	9.38645	0.0395462					8.85717	8.90591	8.88154	0.0243725
0000010011110110	9.09168	9.03183	9.06176	0.0299249	6	6	6	0	8.41422	8.34129	8.37776	0.0364633
0000010011110111	9.39638	9.30975	9.35307	0.0433147	7.26268	6.84069	7.05169	0.210995	8.85102	8.77992	8.81547	0.0355504
0000010011111000	9.20864	9.12335	9.166	0.0426427	6.41484	6.83536	6.6251	0.21026	8.65414	8.44024	8.54719	0.10695
0000010011111001	9.43605	9.37592	9.40598	0.0300659	6.39904	6.41369	6.40636	0.0073239	8.9004	8.91684	8.90862	0.00822025
0000010011111010	9.1524	9.13708	9.14474	0.00765574	6	6	6	0	8.24276	8.18272	8.21274	0.0300242
0000010011111011	9.41251	9.42605	9.41928	0.0067741	7.42045	7.37611	7.39828	0.022169	8.89399	8.78903	8.84151	0.0524798
0000010011111100	9.33151	9.27698	9.30424	0.027265	6.29699	6.9727	6.63484	0.337855	8.74824	8.80708	8.77766	0.0294194
0000010011111101	9.3204	9.43535	9.37788	0.0574723	7.24136	7.4416	7.34148	0.100122	8.94653	8.71436	8.83044	0.116086
0000010011111110	9.14056	9.14197	9.14126	0.000701663	6.50991	6.50326	6.50658	0.00332676	8.42793	8.37858	8.40325	0.0246763
0000010011111111	9.39174	9.36256	9.37715	0.0145902	6.98179	7.06954	7.02566	0.0438757	8.81246	8.72717	8.76982	0.0426486
0000010100000000	8.80912	8.80173	8.80542	0.00369333	6	6	6	0	6	6	6	0
0000010100000001	8.82825	8.75899	8.79362	0.0346288	6	6	6	0	6	6	6	0
0000010100000010	8.6562	8.66012	8.65816	0.00196039	6	6	6	0	6	6	6	0
0000010100000011	8.82667	8.69673	8.7617	0.0649724	6	6	6	0	6	6	6	0
0000010100000100	8.77867	8.73297	8.75582	0.0228485	6	6	6	0	6	6	6	0
0000010100000101	8.7866	8.77203	8.77931	0.00728168	6	6	6	0	6	6	6	0
0000010100000110	8.64525	8.62069	8.63297	0.0122794	6	6	6	0	6	6	6	0
0000010100000111	8.79927	8.62139	8.71033	0.0889372	6	6	6	0	6	6	6	0
0000010100001000	8.82617	8.76004	8.7931	0.0330665	6	6	6	0	6	6	6	0
0000010100001001	8.82383	8.81375	8.81879	0.00503577	6	6	6	0	6	6	6	0
0000010100001010	8.79242	8.68256	8.73749	0.0549301	6	6	6	0	6	6	6	0
0000010100001011	8.78811	8.70079	8.74445	0.0436593	6	6	6	0	6	6	6	0
0000010100001100	8.7957	8.84155	8.81863	0.0229245	6	6	6	0	6	6	6	0
0000010100001101	8.88551	8.89005	8.88778	0.0022708	6	6	6	0	6	6	6	0
0000010100001110	8.7717	8.56301	8.66736	0.104345	6	6	6	0	6	6	6	0
0000010100001111	8.81439	8.782	8.7982	0.0161949	6	6	6	0	6	6	6	0
0000010100010000	8.6882	8.72586	8.70703	0.0188265	6	6	6	0	6	6	6	0
0000010100010001	8.74892	8.83081	8.78987	0.0409443	6	6	6	0	6	6	6	0
0000010100010010	8.63413	8.55135	8.59274	0.0413896	6	6	6	0	6	6	6	0
0000010100010011	8.77177	8.70596	8.73886	0.0329065	6	6	6	0	6	6	6	0
0000010100010100	8.78858	8.71199	8.75028	0.0382958	6	6	6	0	6	6	6	0
0000010100010101	8.77518	8.75516	8.76517	0.0100105	6	6	6	0	6	6	6	0
0000010100010110	8.62239	8.57043	8.59641	0.0259792	6	6	6	0	6	6	6	0
0000010100010111	8.64224	8.67763	8.65994	0.0176981	6	6	6	0	6	6	6	0
0000010100011000	8.72178	8.75381	8.7378	0.0160139	6	6	6	0	6	6	6	0
0000010100011001	8.85173	8.76563	8.80868	0.043054	6	6	6	0	6	6	6	0
0000010100011010	8.60597	8.65784	8.63191	0.0259337	6	6	6	0	6	6	6	0
0000010100011011	8.7521	8.66176	8.70693	0.0451676	6	6	6	0	6	6	6	0
0000010100011100	8.76145	8.77985	8.77065	0.0091992	6	6	6	0	6	6	6	0
0000010100011101	8.77611	8.74314	8.75962	0.0164851	6	6	6	0	6	6	6	0
0000010100011110	8.72782	8.59145	8.65964	0.0681842	6	6	6	0	6	6	6	0
0000010100011111	8.77487	8.77002	8.77244	0.00242094	6	6	6	0	6	6	6	0
0000010100100000	9.31239	9.34321	9.3278	0.0154111	6.35039	6	6.1752	0.175196	8.62258	8.2085	8.41554	0.207042
0000010100100001	9.30885	9.34967	9.32926	0.0204121	6.60941	6	6.3047	0.304705	8.23625	8.30956	8.27291	0.0366577
0000010100100010	9.1744	9.07548	9.12494	0.0494621	6	6	6	0	7.8281	7.81931	7.82371	0.00439436
0000010100100011	9.3829	9.4651	9.424	0.0411027	7.19223	7.39551	7.29387	0.101636	8.63721	8.86997	8.75359	0.116381
0000010100100100	9.34827	9.40897	9.37862	0.0303495					8.37006	8.34654	8.3583	0.0117594
0000010100100101	9.30649	9.39297	9.34973	0.0432404	6.55183	7.39826	6.97504	0.423215	8.11793	8.70307	8.4105	0.292571
0000010100100110	9.24854	9.13679	9.19266	0.0558744	6.2735	6.25473	6.26412	0.00938311	8.21087	8.20368	8.20728	0.0035904
0000010100100111	9.38221	9.38911	9.38566	0.0034493	6.79248	7.46171	7.12709	0.334618	8.82244	8.45228	8.63736	0.185079
0000010100101000	9.243	9.37204	9.30752	0.0645221	6.44136	6.21705	6.3292	0.112154	8.23444	8.29031	8.26238	0.0279367
0000010100101001	9.34751	9.39735	9.37243	0.0249177	6.60786	6.56451	6.58619	0.0216731	8.44638	8.44574	8.44606	0.000319766
0000010100101010	9.23248	9.17083	9.20166	0.0308235	6	6.14711	6.07355	0.0735532	8.22378	8.00893	8.11635	0.107424
0000010100101011	9.44536	9.45697	9.45117	0.00580503	7.36587	7.44828	7.40708	0.0412053	8.36099	8.62972	8.49536	0.134369
0000010100101100	9.31853	9.40178	9.36015	0.0416207	6.24731	6.70103	6.47417	0.22686	8.23349	8.1329	8.1832	0.050296
0000010100101101	9.3312	9.48776	9.40948	0.0782831		6	6	0	8.453	8.37667	8.41483	0.0381682
0000010100101110	9.21184	9.26577	9.23881	0.0269656	6	6.50004	6.25002	0.250022	8.32416	8.12274	8.22345	0.100708
0000010100101111	9.47458	9.37318	9.42388	0.050699	7.20809	7.11749	7.16279	0.0452983	8.48822	8.62768	8.55795	0.0697285
0000010100110000	9.33468	9.32521	9.32995	0.00473217	6.38198	6.46698	6.42448	0.0424977	8.47214	8.53185	8.502	0.0298575
0000010100110001	9.4562	9.39963	9.42791	0.0282837	6.09253	6	6.04626	0.0462646	8.50574	8.5539	8.52982	0.0240797
0000010100110010	9.12807	9.01463	9.07135	0.0567213	6	6.12254	6.06127	0.0612716	8.19249	7.88524	8.03887	0.153622
0000010100110011	9.49181	9.40859	9.4502	0.0416122	7.749	6.93087	7.33993	0.409067	8.87918	8.70631	8.79275	0.0864359
0000010100110100	9.35779	9.30612	9.33196	0.0258363	6.49913	6.82635	6.66274	0.163608	8.50889	8.40387	8.45638	0.0525101
0000010100110101	9.40621	9.44819	9.4272	0.0209899	6.08964	6	6.04482	0.044819	8.47822	8.59443	8.53632	0.0581053
0000010100110110	9.19213	9.01921	9.10567	0.086459	6.22538	6	6.11269	0.112692	8.02031	8.16689	8.0936	0.0732903
0000010100110111	9.41677	9.3863	9.40154	0.0152338	6.35733	6.87114	6.61424	0.256905	8.76273	8.71798	8.74036	0.022372
0000010100111000	9.33896	9.24483	9.2919	0.0470633	6.71147	6.46425	6.58786	0.123611	8.14097	7.99521	8.06809	0.0728834
0000010100111001	9.40107	9.43442	9.41774	0.0166708	6.6611	6.46798	6.56454	0.0965596	8.54593	8.62673	8.58633	0.0403972
0000010100111010	9.14849	9.23557	9.19203	0.0435398	6.05726	6	6.02863	0.0286287	8.45237	8.37088	8.41162	0.0407407
0000010100111011	9.47045	9.56358	9.51702	0.0465677	7.19426	6.92453	7.0594	0.134867	8.64584	8.80265	8.72424	0.0784017
0000010100111100	9.37039	9.27467	9.32253	0.0478593	6.99332	6	6.49666	0.496658	8.66653	8.20946	8.438	0.228535
0000010100111101	9.38354	9.31503	9.34929	0.0342578	6.25256	7.10305	6.6778	0.425246	8.62995	8.5338	8.58187	0.048075
0000010100111110	9.23614	9.26159	9.24886	0.0127243	6.45748	6	6.22874	0.228739	7.98514	8.03649	8.01081	0.0256756
0000010100111111	9.50796	9.48327	9.49561	0.0123483	6.55132	7.41229	6.9818	0.430487	8.62661	8.77419	8.7004	0.0737906
0000010110000000	8.80115	8.75215	8.77665	0.0245022	6	6	6	0	6	6	6	0
0000010110000001	8.84397	8.81541	8.82969	0.0142792	6	6	6	0	6	6	6	0
0000010110000010	8.68105	8.65748	8.66926	0.0117844	6	6	6	0	6	6	6	0
0000010110000011	8.79557	8.84552	8.82054	0.0249728	6	6	6	0	6	6	6	0
0000010110000100	8.76374	8.68728	8.72551	0.0382284	6	6	6	0	6	6	6	0
0000010110000101	8.84886	8.77351	8.81119	0.0376726	6	6	6	0	6	6	6	0
0000010110000110	8.67601	8.68501	8.68051	0.00450202	6	6	6	0	6	6	6	0
0000010110000111	8.7844	8.79883	8.79162	0.00721502	6	6	6	0	6	6	6	0
0000010110001000	8.77048	8.76016	8.76532	0.00515735	6	6	6	0	6	6	6	0
0000010110001001	8.7942	8.83989	8.81704	0.0228448	6	6	6	0	6	6	6	0
0000010110001010	8.72334	8.68342	8.70338	0.0199577	6	6	6	0	6	6	6	0
0000010110001011	8.80652	8.77569	8.79111	0.0154142	6	6	6	0	6	6	6	0
0000010110001100	8.82539	8.76365	8.79452	0.0308709	6	6	6	0	6	6	6	0
0000010110001101	8.77634	8.76305	8.76969	0.00664728	6	6	6	0	6	6	6	0
0000010110001110	8.70958	8.72059	8.71509	0.00550146	6	6	6	0	6	6	6	0
0000010110001111	8.78732	8.80069	8.794	0.00668115	6	6	6	0	6	6	6	0
0000010110010000	8.74808	8.73686	8.74247	0.00560753	6	6	6	0	6	6	6	0
0000010110010001	8.76395	8.83909	8.80152	0.0375712	6	6	6	0	6	6	6	0
0000010110010010	8.59503	8.60107	8.59805	0.0030194	6	6	6	0	6	6	6	0
0000010110010011	8.78004	8.75684	8.76844	0.0115981	6	6	6	0	6	6	6	0
0000010110010100	8.72509	8.78027	8.75268	0.0275891	6	6	6	0	6	6	6	0
0000010110010101	8.75329	8.76211	8.7577	0.00440906	6	6	6	0	6	6	6	0
0000010110010110	8.6337	8.59173	8.61271	0.0209833	6	6	6	0	6	6	6	0
0000010110010111	8.76437	8.76151	8.76294	0.00142605	6	6	6	0	6	6	6	0
0000010110011000	8.79951	8.73603	8.76777	0.0317392	6	6	6	0	6	6	6	0
0000010110011001	8.76944	8.8311	8.80027	0.030826	6	6	6	0	6	6	6	0
0000010110011010	8.72403	8.73636	8.7302	0.00616678	6	6	6	0	6	6	6	0
0000010110011011	8.81707	8.78893	8.803	0.01407	6	6	6	0	6	6	6	0
0000010110011100	8.74002	8.8134	8.77671	0.0366917	6	6	6	0	6	6	6	0
0000010110011101	8.81373	8.8382	8.82597	0.0122314	6	6	6	0	6	6	6	0
0000010110011110	8.69155	8.67521	8.68338	0.00817247	6	6	6	0	6	6	6	0
0000010110011111	8.79818	8.79222	8.7952	0.00298161	6	6	6	0	6	6	6	0
0000010110100000	9.23324	9.22948	9.23136	0.00187883	6.03562	6	6.01781	0.0178107	8.50327	8.5461	8.52468	0.0214123
0000010110100001	9.37528	9.33961	9.35745	0.0178357	6	6	6	0	8.76062	8.61886	8.68974	0.0708759
0000010110100010	9.13849	9.16628	9.15238	0.0138966	6	6	6	0	8.30267	8.21739	8.26003	0.0426385
0000010110100011	9.38346	9.37175	9.37761	0.00585988	6.79011	7.28931	7.03971	0.249602	8.73932	8.69289	8.71611	0.0232145
0000010110100100	9.27064	9.27272	9.27168	0.00104367	6	6	6	0	8.44228	8.50088	8.47158	0.0292974
0000010110100101	9.30457	9.32621	9.31539	0.0108198	6.12072	6	6.06036	0.0603594	8.59009	8.67561	8.63285	0.0427585
0000010110100110	9.18801	9.19816	9.19308	0.00507433	6.25881	6.44806	6.35343	0.0946217	8.33384	8.32926	8.33155	0.00228705
0000010110100111	9.46227	9.40906	9.43566	0.0266043	6.40354	7.04675	6.72515	0.321604	8.73068	8.7164	8.72354	0.00713921
0000010110101000	9.26887	9.28793	9.2784	0.00953201					8.50001	8.32248	8.41125	0.088761
0000010110101001	9.32686	9.2924	9.30963	0.0172269	6	6.72475	6.36237	0.362375	8.76214	8.43271	8.59742	0.164716
0000010110101010	9.25568	9.248	9.25184	0.00384094	6	6	6	0	8.30855	8.32672	8.31763	0.00908113
0000010110101011	9.44061	9.50439	9.4725	0.0318902	7.15357	7.14116	7.14737	0.00620887	8.78286	8.79571	8.78928	0.00642303
0000010110101100	9.33898	9.30206	9.32052	0.0184619	6	6	6	0	8.68401	8.3587	8.52135	0.162655
0000010110101101	9.39114	9.39973	9.39544	0.00429519	6.12324	6.22171	6.17248	0.0492357	8.60956	8.5284	8.56898	0.0405807
0000010110101110	9.21463	9.19629	9.20546	0.00917334	6.0148	6	6.0074	0.00740069	8.39137	8.32538	8.35838	0.0329995
0000010110101111	9.4324	9.39847	9.41544	0.0169615					8.63827	8.69256	8.66541	0.0271461
0000010110110000	9.27661	9.28185	9.27923	0.00262179	6	6	6	0	8.5694	8.45482	8.51211	0.0572871
0000010110110001	9.41214	9.38884	9.40049	0.0116491	6.51957	6.88364	6.7016	0.182036	8.72353	8.6827	8.70312	0.0204187
0000010110110010	9.17315	9.12866	9.15091	0.0222481	6	6.06146	6.03073	0.0307323	8.36638	8.16973	8.26806	0.098326
0000010110110011	9.43384	9.4437	9.43877	0.00493021	7.2636	7.11347	7.18853	0.0750654	8.97047	8.7714	8.87094	0.0995321
0000010110110100	9.38041	9.30396	9.34218	0.0382254	6.08809	6	6.04405	0.0440473	8.76391	8.52931	8.64661	0.117299
0000010110110101	9.39954	9.34485	9.3722	0.0273446	6.24828	6.66347	6.45587	0.207596	8.72961	8.79299	8.7613	0.0316866
0000010110110110	9.20376	9.11842	9.16109	0.0426722	6	6	6	0	8.34944	8.31969	8.33457	0.0148726
0000010110110111	9.47167	9.33975	9.40571	0.0659586	6.84711	7.22012	7.03362	0.186506	8.94249	8.59134	8.76692	0.175575
0000010110111000	9.31494	9.2972	9.30607	0.00886702	6	6	6	0	8.4807	8.56359	8.52214	0.0414466
0000010110111001	9.40464	9.3942	9.39942	0.00522377	6.52628	7.20092	6.8636	0.337317	8.72681	8.77767	8.75224	0.0254299
0000010110111010	9.22428	9.18687	9.20558	0.0187056	6.02446	6	6.01223	0.0122307	8.46781	8.29015	8.37898	0.0888282
0000010110111011	9.50418	9.40882	9.4565	0.0476798	7.35482	7.08878	7.2218	0.13302	8.71933	8.74953	8.73443	0.0150999
0000010110111100	9.33944	9.32752	9.33348	0.00595968	6	6	6	0	8.64103	8.48204	8.56153	0.0794947
0000010110111101	9.35972	9.42128	9.3905	0.0307806	6.50131	7.37519	6.93825	0.436939	8.75589	8.69954	8.72772	0.0281785
0000010110111110	9.25454	9.18228	9.21841	0.0361282	6.31832	6.24055	6.27944	0.0388827	8.50627	8.41706	8.46166	0.0446049
0000010110111111	9.44791	9.46725	9.45758	0.0096724	7.06614	7.01505	7.04059	0.0255457	8.86378	8.66245	8.76311	0.100668
0000010111000000	9.02528	8.94876	8.98702	0.03826	6	6	6	0	6	6	6	0
0000010111000001	9.0269	9.01341	9.02016	0.00674843	6	6	6	0	6	6	6	0
0000010111000010	8.90155	8.92242	8.91198	0.0104368	6	6	6	0	6	6	6	0
0000010111000011	9.02159	8.90895	8.96527	0.05632	6	6	6	0
0000010111000100	9.03023	9.10526	9.06775	0.0375137	6	6	6	0	6	6	6	0
0000010111000101	9.04941	9.00529	9.02735	0.0220585	6	6	6	0	6	6	6	0
0000010111000110	8.8492	8.83683	8.84301	0.00618172	6	6	6	0	6	6	6	0
0000010111000111	9.04981	8.93185	8.99083	0.0589838	6	6	6	0
0000010111001000	9.03723	9.00332	9.02027	0.0169541	6	6	6	0	6	6	6	0
0000010111001001	9.11227	9.08401	9.09814	0.0141342	6	6	6	0	6	6	6	0
0000010111001010	8.88812	8.87198	8.88005	0.00806964	6	6	6	0	6	6	6	0
0000010111001011	8.97843	8.98769	8.98306	0.00463143	6	6	6	0	6	6	6	0
0000010111001100	9.03518	9.04556	9.04037	0.00519391	6	6	6	0	6	6	6	0
0000010111001101	9.00168	8.95199	8.97684	0.0248466	6	6	6	0	6	6	6	0
0000010111001110	8.94208	8.90921	8.92564	0.0164345	6	6	6	0	6	6	6	0
0000010111001111	8.99262	9.04157	9.0171	0.0244758	6	6	6	0
0000010111010000	9.03677	9.07266	9.05471	0.0179441	6	6	6	0	6	6	6	0
0000010111010001	9.10482	9.02813	9.06648	0.0383413	6	6	6	0	6	6	6	0
0000010111010010	8.83424	8.87512	8.85468	0.0204393	6	6	6	0	6	6	6	0
0000010111010011	9.09678	9.0547	9.07574	0.0210434	6	6	6	0	7.76193	7.31793	7.53993	0.222
0000010111010100	9.01793	9.04404	9.03099	0.013056	6	6	6	0	6	6	6	0
0000010111010101	9.11218	9.08791	9.10004	0.0121352	6	6	6	0	6	6.94861	6.4743	0.474303
0000010111010110	8.96026	8.92637	8.94331	0.016942	6	6	6	0	6	6	6	0
0000010111010111	9.0757	9.16345	9.11957	0.0438741	6	6	6	0
0000010111011000	9.07853	9.03829	9.05841	0.0201186	6	6	6	0	6	6	6	0
0000010111011001	9.10653	8.98024	9.04339	0.0631461	6	6	6	0	6	6	6	0
0000010111011010	8.96735	8.94273	8.95504	0.0123117	6	6	6	0	6	6	6	0
0000010111011011	9.12861	9.08219	9.1054	0.0232138	6	6	6	0
0000010111011100	9.0508	9.20397	9.12738	0.0765842	6	6	6	0	6	6	6	0
0000010111011101	9.039	9.27613	9.15757	0.118565	6	6	6	0	6	6	6	0
0000010111011110	8.88412	8.91929	8.90171	0.0175833	6	6	6	0	6	6	6	0
0000010111011111	9.15508	9.14093	9.14801	0.00707358	6	6	6	0
0000010111100000	9.56274	9.49972	9.53123	0.0315082	7.85686	7.62815	7.7425	0.114351	9.53885	9.36646	9.45266	0.0861944
0000010111100001	9.70461	9.71104	9.70782	0.00321477	7.8271	7.66122	7.74416	0.082942	9.65478	9.6622	9.65849	0.0037084
0000010111100010	9.46991	9.45364	9.46178	0.00813333	7.95244	7.59592	7.77418	0.178261	9.23966	9.34708	9.29337	0.0537066
0000010111100011	9.55058	9.73533	9.64295	0.0923719	8.01412	8.05656	8.03534	0.0212194	9.65299	9.65705	9.65502	0.00202567
0000010111100100	9.59784	9.60818	9.60301	0.00516888	7.78189	7.77954	7.78071	0.00117582	9.51937	9.43974	9.47955	0.0398144
0000010111100101	9.64117	9.15601	9.39859	0.242577	7.80337	8.06792	7.93565	0.132276	9.51067	9.47075	9.49071	0.0199565
0000010111100110	9.52456	9.44942	9.48699	0.0375723	7.72809	7.4151	7.5716	0.156495	9.5343	9.1917	9.363	0.171304
0000010111100111	9.65806	9.86564	9.76185	0.103789	7.92528	7.98101	7.95315	0.0278624	9.64407	9.53486	9.58947	0.0546021
0000010111101000	9.51203	9.44549	9.47876	0.0332743	7.26803	7.71825	7.49314	0.225111	9.39578	9.39985	9.39781	0.00203373
0000010111101001	9.62902	9.7704	9.69971	0.0706877	7.89241	7.76594	7.82918	0.0632375	9.43748	9.40796	9.42272	0.0147617
0000010111101010	9.46808	9.54393	9.50601	0.0379272	7.42485	7.40278	7.41382	0.0110335	9.17489	9.40096	9.28792	0.113033
0000010111101011	9.65293	9.82763	9.74028	0.0873495	7.93281	8.02823	7.98052	0.04771	9.49454	9.85085	9.67269	0.178158
0000010111101100	9.60059	9.73207	9.66633	0.0657399	7.61347	7.55642	7.58494	0.028526	9.3875	9.28644	9.33697	0.0505293
0000010111101101	9.63481	9.55211	9.59346	0.0413461	7.82119	8.22769	8.02444	0.203248	9.474	9.64622	9.56011	0.0861137
0000010111101110	9.543	9.50857	9.52578	0.0172168	7.84148	7.51794	7.67971	0.161773	9.12495	9.20169	9.16332	0.038369
0000010111101111	9.69552	9.80255	9.74903	0.0535143	8.16284	7.80107	7.98195	0.180887	9.64132	9.68048	9.6609	0.0195769
0000010111110000	9.48486	9.59726	9.54106	0.0561991	8.06153	7.69487	7.8782	0.183328	9.41585	9.37007	9.39296	0.0228865
0000010111110001	9.70534	9.81649	9.76092	0.0555732	7.78889	7.71061	7.74975	0.0391412	9.55739	9.58528	9.57134	0.0139441
0000010111110010	9.44544	9.47242	9.45893	0.0134902	7.34646	7.56626	7.45636	0.1099	9.17034	9.31149	9.24091	0.0705737
0000010111110011	9.67157	9.63761	9.65459	0.0169779	8.03445	8.04282	8.03864	0.00418225	9.54049	9.62533	9.58291	0.0424167
0000010111110100	9.65033	9.54511	9.59772	0.0526083	7.06908	7.51612	7.2926	0.223522	9.54561	9.82479	9.6852	0.139591
0000010111110101	9.63266	9.6648	9.64873	0.0160711	7.82272	7.63209	7.72741	0.0953192	9.51427	9.58254	9.5484	0.0341314
0000010111110110	9.4979	9.52309	9.51049	0.0125992	7.52555	7.60213	7.56384	0.0382875	9.39842	9.17798	9.2882	0.110218
0000010111110111	9.63636	9.72596	9.68116	0.0447999	8.03006	8.09425	8.06215	0.0320946	9.61148	9.75618	9.68383	0.0723459
0000010111111000	9.60515	9.47815	9.54165	0.0635014	7.38432	7.51639	7.45035	0.0660359	9.49468	9.43937	9.46702	0.0276565
0000010111111001	9.56466	9.74019	9.65242	0.0877637	7.96786	7.56906	7.76846	0.1994	9.53247	9.66576	9.59912	0.0666459
0000010111111010	9.49601	9.5515	9.52375	0.0277474	7.66327	7.30557	7.48442	0.178852	9.24654	9.3138	9.28017	0.0336302
0000010111111011	9.65856	9.74958	9.70407	0.0455104	7.99962	7.90377	7.95169	0.0479298	9.73504	9.6526	9.69382	0.0412219
0000010111111100	9.46978	9.67802	9.5739	0.104118	7.77071	7.44211	7.60641	0.164299	9.66481	9.42121	9.54301	0.121796
0000010111111101	9.61255	9.77661	9.69458	0.0820285	7.74242	7.52866	7.63554	0.10688	9.56476	9.56018	9.56247	0.00228561
0000010111111110	9.4968	9.48219	9.4895	0.00730373	7.37652	7.46578	7.42115	0.0446324	9.33735	9.36644	9.3519	0.0145455
0000010111111111	9.5616	9.79037	9.67599	0.114384	7.90339	8.21407	8.05873	0.155341	9.52607	9.76425	9.64516	0.119092
0000011000000000	8.82107	8.72276	8.77191	0.0491513	6	6	6	0	6	6	6	0
0000011000000001	8.8398	8.75986	8.79983	0.0399684	6	6	6	0	6	6	6	0
0000011000000010	8.68926	8.66427	8.67677	0.012492	6	6	6	0	6	6	6	0
0000011000000011	8.86814	8.90072	8.88443	0.0162933	6	6	6	0	6	6	6	0
0000011000000100	8.88679	8.80052	8.84366	0.0431334	6	6	6	0	6	6	6	0
0000011000000101	8.8287	8.86377	8.84624	0.0175357	6	6	6	0	6	6	6	0
0000011000000110	8.70655	8.595	8.65077	0.0557762	6	6	6	0	6	6	6	0
0000011000000111	8.87712	8.83834	8.85773	0.0193889	6	6	6	0	6	6	6	0
0000011000001000	8.82747	8.8886	8.85803	0.0305666	6	6	6	0	6	6	6	0
0000011000001001	8.8911	8.90876	8.89993	0.00883185	6	6	6	0	6	6	6	0
0000011000001010	8.77985	8.60534	8.69259	0.0872577	6	6	6	0	6	6	6	0
0000011000001011	8.8808	8.80851	8.84466	0.0361423	6	6	6	0	6	6	6	0
0000011000001100	8.84947	8.8125	8.83098	0.0184874	6	6	6	0	6	6	6	0
0000011000001101	8.86114	8.78712	8.82413	0.0370097	6	6	6	0	6	6	6	0
0000011000001110	8.73759	8.76955	8.75357	0.015978	6	6	6	0	6	6	6	0
0000011000001111	8.89	8.88218	8.88609	0.0039078	6	6	6	0
0000011000010000	8.80871	8.72539	8.76705	0.041658	6	6	6	0	6	6	6	0
0000011000010001	8.83628	8.7813	8.80879	0.0274934	6	6	6	0	6	6	6	0
0000011000010010	8.66757	8.73191	8.69974	0.0321667	6	6	6	0	6	6	6	0
0000011000010011	8.88293	8.91643	8.89968	0.0167466	6	6	6	0
0000011000010100	8.82842	8.72699	8.7777	0.050714	6	6	6	0	6	6	6	0
0000011000010101	8.83834	8.80371	8.82103	0.0173187	6	6	6	0	6	6	6	0
0000011000010110	8.70071	8.6327	8.6667	0.0340015	6	6	6	0	6	6	6	0
0000011000010111	8.85614	8.80604	8.83109	0.0250463	6	6	6	0	6	6	6	0
0000011000011000	8.80962	8.88597	8.8478	0.0381765	6	6	6	0	6	6	6	0
0000011000011001	8.87186	8.81718	8.84452	0.0273406	6	6	6	0	6	6	6	0
0000011000011010	8.8402	8.71513	8.77766	0.0625355	6	6	6	0	6	6	6	0
0000011000011011	8.89032	8.82081	8.85556	0.0347546	6	6	6	0	6	6	6	0
0000011000011100	8.85788	8.86487	8.86137	0.00349254	6	6	6	0	6	6	6	0
0000011000011101	8.88309	8.84614	8.86462	0.0184768	6	6	6	0	6	6	6	0
0000011000011110	8.79895	8.73869	8.76882	0.03013	6	6	6	0	6	6	6	0
0000011000011111	8.89446	8.92431	8.90938	0.0149249	6	6	6	0	6	6	6	0
0000011000100000	9.01881	9.01804	9.01843	0.000382873	6	6	6	0	7.91343	7.70964	7.81153	0.101896
0000011000100001	9.00133	9.08371	9.04252	0.0411912	6	6.21233	6.10616	0.106164	7.84995	7.94989	7.89992	0.0499688
0000011000100010	8.90223	8.79969	8.85096	0.0512724	6	6	6	0	7.46271	8.00877	7.73574	0.273033
0000011000100011	9.08311	9.01463	9.04887	0.0342361	6	6.28104	6.14052	0.140518	7.90125	8.2433	8.07228	0.171023
0000011000100100	9.07158	9.03409	9.05284	0.0187449	6	6	6	0	8.05089	8.02916	8.04003	0.0108635
0000011000100101	9.02851	8.98285	9.00568	0.0228319	6	6	6	0	7.73568	7.86831	7.80199	0.0663161
0000011000100110	8.96175	8.94483	8.95329	0.00846096	6	6	6	0	7.60628	7.63875	7.62251	0.0162329
0000011000100111	9.11764	9.14743	9.13254	0.014897	6	6.12377	6.06189	0.0618863	7.68995	8.02835	7.85915	0.169196
0000011000101000	9.07075	8.97137	9.02106	0.0496879	6	6	6	0	7.50209	7.93804	7.72007	0.217976
0000011000101001	9.13841	8.98391	9.06116	0.0772505	6	6	6	0	8.00758	7.70467	7.85613	0.151452
0000011000101010	8.94181	8.82848	8.88514	0.0566652	6	6	6	0	7.49516	7.37788	7.43652	0.0586381
0000011000101011	9.13688	9.09804	9.11746	0.0194202	6.16984		6.16984	0	7.74078	8.07559	7.90818	0.167406
0000011000101100	9.01201	8.93679	8.9744	0.0376083	6	6	6	0	7.80343	7.88274	7.84309	0.0396525
0000011000101101	9.06461	9.06158	9.06309	0.00151634	6	6	6	0	8.27907	7.95334	8.1162	0.162864
0000011000101110	9.01536	8.95679	8.98607	0.0292866	6	6	6	0	7.85858	7.62462	7.7416	0.11698
0000011000101111	9.14391	9.06907	9.10649	0.0374184	6.04211	6.46085	6.25148	0.209369	8.41686	8.00216	8.20951	0.207346
0000011000110000	9.09703	9.01435	9.05569	0.0413408	6	6	6	0	8.09738	8.23345	8.16542	0.0680354
0000011000110001	9.1567	9.11999	9.13835	0.0183543	6	6	6	0	8.33252	8.3372	8.33486	0.00233956
0000011000110010	8.94194	8.84298	8.89246	0.0494794	6	6	6	0	7.74709	7.45852	7.6028	0.144284
0000011000110011	9.21481	9.19323	9.20402	0.0107938	6.51101	6	6.25551	0.255506	8.31109	8.25491	8.283	0.0280904
0000011000110100	9.10101	9.0074	9.05421	0.0468076	6.21496	6	6.10748	0.10748	8.10431	8.0463	8.0753	0.0290022
0000011000110101	9.14669	9.09737	9.12203	0.0246604	6.01623	6	6.00811	0.00811478	8.30052	8.29533	8.29792	0.00259469
0000011000110110	8.95169	8.94298	8.94734	0.00435647	6	6	6	0	7.88261	7.85347	7.86804	0.0145734
0000011000110111	9.21968	9.19946	9.20957	0.0101067	6	6.5422	6.2711	0.271101	8.44347	8.07238	8.25793	0.185545
0000011000111000	9.11235	9.09372	9.10304	0.00931661	6	6	6	0	8.13438	7.9273	8.03084	0.103541
0000011000111001	9.16353	9.17689	9.17021	0.00668103	6	6	6	0	8.60849	8.08687	8.34768	0.260812
0000011000111010	8.97051	9.01847	8.99449	0.0239805	6	6	6	0	8.0437	7.6323	7.838	0.2057
0000011000111011	9.26109	9.15822	9.20965	0.0514366					8.69211	8.45006	8.57108	0.121023
0000011000111100	9.1785	9.12369	9.1511	0.0274071	6	6.25483	6.12741	0.127413	8.08574	8.02586	8.0558	0.029939
0000011000111101	9.09965	9.06063	9.08014	0.019509					8.18744	8.09417	8.1408	0.0466344
0000011000111110	9.00568	9.07069	9.03818	0.0325058	6	6	6	0	7.99003	7.84614	7.91808	0.0719433
0000011000111111	9.21637	9.24211	9.22924	0.0128709	6	6	6	0	8.29341	8.46242	8.37792	0.0845063
0000011001000000	8.91633	8.95605	8.93619	0.0198578	6	6	6	0	6	6	6	0
0000011001000001	8.94652	8.87843	8.91247	0.0340419	6	6	6	0	6	6	6	0
0000011001000010	8.73622	8.61783	8.67702	0.0591956	6	6	6	0	6	6	6	0
0000011001000011	8.90014	8.95286	8.9265	0.0263598	6	6	6	0	7.73655	7.83169	7.78412	0.0475678
0000011001000100	8.93967	8.90599	8.92283	0.0168417	6	6	6	0	6	6	6	0
0000011001000101	8.92016	8.90473	8.91245	0.00771441	6	6	6	0	6	6	6	0
0000011001000110	8.76869	8.79595	8.78232	0.013632	6	6	6	0	6	6	6	0
0000011001000111	8.86496	8.937	8.90098	0.0360194	6	6	6	0
0000011001001000	8.93733	8.9366	8.93696	0.000364317	6	6	6	0	6	6	6	0
0000011001001001	8.89295	8.81091	8.85193	0.0410192	6	6	6	0	6	6	6	0
0000011001001010	8.8175	8.81863	8.81807	0.000562649	6	6	6	0	6	6	6	0
0000011001001011	8.91887	8.87886	8.89887	0.0200049	6	6	6	0	7.26199	7.09957	7.18078	0.0812123
0000011001001100	8.96151	8.85776	8.90964	0.0518757	6	6	6	0	6	6	6	0
0000011001001101	8.93049	8.83647	8.88348	0.0470077	6	6	6	0	6	6	6	0
0000011001001110	8.78429	8.76124	8.77277	0.0115233	6	6	6	0	6	6	6	0
0000011001001111	8.89127	8.87286	8.88206	0.00920803	6	6	6	0	7.89742	7.60183	7.74962	0.1478
0000011001010000	8.83727	8.87457	8.85592	0.0186487	6	6	6	0
0000011001010001	8.89867	8.89289	8.89578	0.0028936	6	6	6	0
0000011001010010	8.74962	8.74652	8.74807	0.0015522	6	6	6	0
0000011001010011	8.9015	8.88309	8.8923	0.00920624	6	6	6	0	7.86551	7.73612	7.80082	0.0646956
0000011001010100	8.86969	8.88483	8.87726	0.0075692	6	6	6	0
0000011001010101	8.88937	8.88189	8.88563	0.00373828	6	6	6	0	7.80725	7.43086	7.61905	0.188196
0000011001010110	8.71254	8.72036	8.71645	0.003907	6	6	6	0	6	6	6	0
0000011001010111	8.87442	8.86243	8.86843	0.00599152	6	6	6	0	7.45238	7.52064	7.48651	0.0341319
0000011001011000	8.93926	8.97983	8.95955	0.0202869	6	6	6	0
0000011001011001	8.99006	8.95991	8.97499	0.0150734	6	6	6	0	8.20073	7.41843	7.80958	0.391149
0000011001011010	8.80493	8.83293	8.81893	0.0139975	6	6	6	0	6	6	6	0
0000011001011011	8.93409	8.96976	8.95193	0.0178332	6	6	6	0	7.64544	7.68482	7.66513	0.0196912
0000011001011100	8.92625	8.83522	8.88074	0.0455147	6	6	6	0	6	6	6	0
0000011001011101	8.95987	8.94135	8.95061	0.00926129	6	6	6	0	8.03574	8.15878	8.09726	0.0615221
0000011001011110	8.75324	8.80977	8.78151	0.0282661	6	6	6	0	6	6	6	0
0000011001011111	8.99368	8.85435	8.92402	0.0696679	6	6	6	0	7.23515	7.51223	7.37369	0.138542
0000011001100000	9.22122	9.21165	9.21644	0.00478475	6.10091	6	6.05045	0.0504534	8.81584	8.66073	8.73829	0.0775558
0000011001100001	9.20041	9.33838	9.26939	0.0689842	6.21634	6.25407	6.2352	0.0188627	8.83837	8.70772	8.77305	0.0653252
0000011001100010	9.0496	9.0088	9.0292	0.0203983	6	6	6	0	8.38195	8.15497	8.26846	0.113488
0000011001100011	9.32274	9.26816	9.29545	0.0272926	6.33668	7.07307	6.70487	0.368194	8.89481	8.86401	8.87941	0.0153989
0000011001100100	9.21081	9.18287	9.19684	0.0139708	6	6.40296	6.20148	0.201481	8.72301	8.75568	8.73935	0.0163361
0000011001100101	9.31483	9.26067	9.28775	0.0270786	6.06769	6.03532	6.0515	0.0161861	8.71311	8.76495	8.73903	0.0259231
0000011001100110	9.02604	9.04413	9.03509	0.0090466	6	6	6	0	8.41877	8.55015	8.48446	0.065687
0000011001100111	9.25181	9.36911	9.31046	0.0586489	6.49575	6.8266	6.66117	0.165425	8.83139	8.87307	8.85223	0.0208415
0000011001101000	9.25236	9.21039	9.23137	0.0209838	6	6	6	0	8.4447	8.63567	8.54019	0.0954858
0000011001101001	9.31376	9.29655	9.30515	0.00860104	6.10337	6.59227	6.34782	0.244449	8.82547	8.71188	8.76867	0.0567937
0000011001101010	9.17903	9.19071	9.18487	0.00584069	6.23419	6	6.11709	0.117093	8.547	8.32256	8.43478	0.112219
0000011001101011	9.35685	9.28905	9.32295	0.0338985	6.57357	7.04657	6.81007	0.236497	8.98634	8.82769	8.90702	0.0793214
0000011001101100	9.2587	9.32628	9.29249	0.03379	6.16964	6	6.08482	0.0848181	8.92042	8.89845	8.90943	0.0109854
0000011001101101	9.30324	9.16318	9.23321	0.0700258	6.03998	6.18295	6.11147	0.071487	8.91212	8.89057	8.90134	0.0107714
0000011001101110	9.15435	9.10956	9.13196	0.0223926	6	6.11898	6.05949	0.0594883	8.44833	8.33944	8.39389	0.054445
0000011001101111	9.35464	9.33521	9.34493	0.00971337	6.46774	7.06577	6.76675	0.299017	8.86344	8.94377	8.9036	0.0401614
0000011001110000	9.2992	9.27418	9.28669	0.0125102	6.5353	6.89524	6.71527	0.179972	8.92363	8.72218	8.8229	0.100725
0000011001110001	9.23054	9.35254	9.29154	0.0609998	6.37716	6	6.18858	0.188578	8.74887	8.7771	8.76299	0.0141127
0000011001110010	9.02895	8.921	8.97497	0.0539768	6	6.19558	6.09779	0.0977917	8.27297	8.3953	8.33414	0.0611691
0000011001110011	9.33021	9.28067	9.30544	0.0247726	6.30502	6.67435	6.48968	0.184663	9.02832	9.02283	9.02557	0.00274753
0000011001110100	9.19825	9.25444	9.22635	0.0280989	6.48562	6	6.24281	0.242811	9.00829	8.74935	8.87882	0.129472
0000011001110101	9.24674	9.27497	9.26085	0.0141155	6.30286	6.28015	6.2915	0.0113554	8.90683	8.73174	8.81929	0.0875451
0000011001110110	9.05553	9.08358	9.06955	0.0140249	6	6	6	0	8.47902	8.41808	8.44855	0.0304679
0000011001110111	9.32914	9.27481	9.30197	0.0271632	6.3038	7.17865	6.74123	0.437425	8.92456	8.84962	8.88709	0.0374693
0000011001111000	9.25896	9.25381	9.25639	0.00257142		6.48051	6.48051	0	8.96368	8.73623	8.84995	0.113726
0000011001111001	9.31848	9.21865	9.26856	0.0499144	6.00096	6.97784	6.4894	0.488438	8.80854	9.01551	8.91203	0.103483
0000011001111010	9.11776	9.13213	9.12494	0.00718406					8.67617	8.54133	8.60875	0.0674197
0000011001111011	9.29758	9.35382	9.3257	0.0281177					8.92365	8.94074	8.93219	0.00854502
0000011001111100	9.21546	9.18541	9.20043	0.015026	6.27238	6.92492	6.59865	0.326269	8.75719	8.7327	8.74494	0.0122449
0000011001111101	9.33713	9.22432	9.28073	0.0564082	6	6.97687	6.48843	0.488433	9.04356	8.96114	9.00235	0.0412093
0000011001111110	9.10541	9.07911	9.09226	0.0131501	6	6	6	0	8.69099	8.34242	8.5167	0.174284
0000011001111111	9.42815	9.35618	9.39216	0.0359882	6	6.42304	6.21152	0.211522	8.99063	8.92064	8.95564	0.034996
0000011010000000	8.87959	8.85287	8.86623	0.0133602	6	6	6	0	6	6	6	0
0000011010000001	8.86616	8.88183	8.874	0.00783462	6	6	6	0	6	6	6	0
0000011010000010	8.73129	8.7178	8.72454	0.00674433	6	6	6	0	6	6	6	0
0000011010000011	8.86605	8.92634	8.8962	0.0301467	6	6	6	0
0000011010000100	8.78409	8.81561	8.79985	0.0157634	6	6	6	0	6	6	6	0
0000011010000101	8.85368	8.87239	8.86303	0.00935629	6	6	6	0	6	6.77976	6.38988	0.389882
0000011010000110	8.78142	8.73962	8.76052	0.0209	6	6	6	0	6	6	6	0
0000011010000111	8.92715	8.89308	8.91012	0.0170342	6	6	6	0
0000011010001000	8.89471	8.88495	8.88983	0.00487726	6	6	6	0	6	6	6	0
0000011010001001	8.89151	8.92157	8.90654	0.0150292	6	6	6	0	6	6	6	0
0000011010001010	8.83362	8.73576	8.78469	0.0489297	6	6	6	0	6	6	6	0
0000011010001011	8.92036	8.90359	8.91197	0.00838559	6	6	6	0	6.70569	6	6.35284	0.352843
0000011010001100	8.8881	8.83587	8.86198	0.026114	6	6	6	0	6	6	6	0
0000011010001101	8.90564	8.8859	8.89577	0.00987016	6	6	6	0	6	6	6	0
0000011010001110	8.79172	8.71321	8.75246	0.0392593	6	6	6	0	6	6	6	0
0000011010001111	8.96253	8.88338	8.92295	0.0395758	6	6	6	0
0000011010010000	8.7617	8.73185	8.74678	0.0149261	6	6	6	0	6	6	6	0
0000011010010001	8.84798	8.80926	8.82862	0.01936	6	6	6	0	6	6	6	0
0000011010010010	8.69023	8.67592	8.68308	0.0071533	6	6	6	0	6	6	6	0
0000011010010011	8.87045	8.78998	8.83021	0.040235	6	6	6	0	6	6.97358	6.48679	0.486789
0000011010010100	8.88278	8.82542	8.8541	0.0286804	6	6	6	0	6		6	0
0000011010010101	8.8887	8.81842	8.85356	0.0351415	6	6	6	0	6	6	6	0
0000011010010110	8.66061	8.69338	8.67699	0.0163866	6	6	6	0	6	6	6	0
0000011010010111	8.88271	8.76971	8.82621	0.0565023	6	6	6	0
0000011010011000	8.80808	8.81589	8.81199	0.00390658	6	6	6	0	6	6	6	0
0000011010011001	8.9013	8.83274	8.86702	0.0342774	6	6	6	0
0000011010011010	8.7837	8.76017	8.77194	0.011765	6	6	6	0	6	6	6	0
0000011010011011	8.9003	8.88633	8.89332	0.00698566	6	6	6	0
0000011010011100	8.8563	8.84976	8.85303	0.00327009	6	6	6	0	6	6	6	0
0000011010011101	8.92067	8.88677	8.90372	0.016954	6	6	6	0
0000011010011110	8.79114	8.75146	8.7713	0.0198382	6	6	6	0	6	6	6	0
0000011010011111	8.93387	8.89808	8.91597	0.0178957	6	6	6	0	6		6	0
0000011010100000	9.14225	9.07503	9.10864	0.0336129	6	6	6	0	7.69669	7.93909	7.81789	0.1212
0000011010100001	9.13841	9.10544	9.12193	0.0164861	6	6	6	0	7.66457	8.29003	7.9773	0.312732
0000011010100010	8.86583	8.85375	8.85979	0.00604068	6	6	6	0	7.33537	7.42887	7.38212	0.0467487
0000011010100011	9.20856	9.13723	9.1729	0.0356643	6.23357	6	6.11679	0.116787	8.29815	7.94464	8.1214	0.176758
0000011010100100	9.09779	8.9729	9.03534	0.0624444	6	6	6	0	7.91343	7.89038	7.9019	0.0115204
0000011010100101	9.15203	9.12725	9.13964	0.0123927	6	6	6	0	8.25645	8.03278	8.14461	0.111835
0000011010100110	8.94619	8.91583	8.93101	0.0151808	6	6	6	0	8.18921	7.75112	7.97016	0.219045
0000011010100111	9.1904	9.18355	9.18698	0.00342739	6.4591	6.15282	6.30596	0.153142	8.30245	8.13811	8.22028	0.0821698
0000011010101000	9.06712	9.05153	9.05932	0.0077975	6	6	6	0	7.81478	7.99341	7.90409	0.0893149
0000011010101001	9.21679	9.17665	9.19672	0.0200704	6.02406	6	6.01203	0.0120303	8.46698	8.14339	8.30518	0.161792
0000011010101010	8.89232	8.96819	8.93026	0.0379352	6	6	6	0	7.83911	7.86928	7.8542	0.0150846
0000011010101011	9.21968	9.10163	9.16065	0.0590245	6	6	6	0	8.02977	8.07293	8.05135	0.0215794
0000011010101100	9.04434	9.09819	9.07127	0.0269224	6	6	6	0	7.81643	7.95838	7.88741	0.0709708
0000011010101101	9.18381	9.10341	9.14361	0.0401973	6.14542	6.0888	6.11711	0.0283104	8.02324	7.92752	7.97538	0.0478583
0000011010101110	8.99553	8.99561	8.99557	3.78726e-05	6	6	6	0	8.08492	7.75377	7.91934	0.165574
0000011010101111	9.23569	9.16691	9.2013	0.0343875	6.01058	6	6.00529	0.00529038	8.32673	8.28252	8.30462	0.0221057
0000011010110000	9.09439	9.10233	9.09836	0.00396759	6	6	6	0	7.94912	8.28698	8.11805	0.16893
0000011010110001	9.11912	9.08693	9.10302	0.0160947	6.10812	6.35075	6.22943	0.121315	8.3758	8.39261	8.3842	0.00840667
0000011010110010	8.96357	8.85932	8.91145	0.0521253	6	6.40249	6.20124	0.201244	7.95996	7.92295	7.94145	0.0185073
0000011010110011	9.24874	9.21373	9.23124	0.0175082	6	6	6	0	8.47449	8.26852	8.3715	0.102984
0000011010110100	9.14793	9.11118	9.12956	0.0183746	6	6	6	0	8.17314	8.03933	8.10624	0.0669065
0000011010110101	9.20282	9.2009	9.20186	0.000958193	6.09893	6	6.04947	0.0494666	8.53095	8.40505	8.468	0.0629532
0000011010110110	8.97875	8.94196	8.96035	0.0183965	6	6	6	0	7.89952	7.97036	7.93494	0.035423
0000011010110111	9.25539	9.11769	9.18654	0.0688507	6	6	6	0	8.52658	8.30567	8.41612	0.110457
0000011010111000	9.08567	8.99899	9.04233	0.0433415	6	6	6	0	7.93762	8.1376	8.03761	0.0999872
0000011010111001	9.17638	9.20262	9.1895	0.0131181	6	6	6	0	8.37459	8.4725	8.42355	0.048955
0000011010111010	8.9342	8.86457	8.89938	0.0348171	6	6	6	0	8.0792	7.6934	7.8863	0.192903
0000011010111011	9.29134	9.21205	9.25169	0.0396415	6.38369	6	6.19184	0.191843	8.65497	8.47704	8.56601	0.0889629
0000011010111100	9.06539	9.03741	9.0514	0.0139873	6	6	6	0	8.24606	8.12823	8.18715	0.0589159
0000011010111101	9.28171	9.26754	9.27463	0.00708452	6.29882	6	6.14941	0.149408	8.64511	8.46158	8.55335	0.0917646
0000011010111110	9.01723	8.90271	8.95997	0.0572588	6	6	6	0	7.72469	8.1621	7.9434	0.218707
0000011010111111	9.21528	9.15824	9.18676	0.0285194	6	6	6	0	8.61031	8.34635	8.47833	0.13198
0000011011000000	8.86269	8.94823	8.90546	0.0427654	6	6	6	0	6	6	6	0
0000011011000001	8.9702	8.90657	8.93839	0.0318131	6	6	6	0
0000011011000010	8.78233	8.80723	8.79478	0.0124498	6	6	6	0
0000011011000011	8.94243	8.92125	8.93184	0.0105911	6	6	6	0	7.61741	8.0284	7.82291	0.205495
0000011011000100	8.91074	8.84226	8.8765	0.0342443	6	6	6	0
0000011011000101	8.90512	8.93576	8.92044	0.0153194	6	6	6	0	7.24239	7.44143	7.34191	0.0995194
0000011011000110	8.82952	8.8079	8.81871	0.0108134	6	6	6	0	6	6	6	0
0000011011000111	8.92472	8.88401	8.90437	0.0203583	6	6	6	0	7.31071	7.69711	7.50391	0.1932
0000011011001000	8.92082	8.99289	8.95686	0.036035	6	6	6	0	6	6	6	0
0000011011001001	8.94295	8.97949	8.96122	0.0182708	6	6	6	0	7.76284	7.56617	7.6645	0.0983335
0000011011001010	8.83361	8.82995	8.83178	0.00183151	6	6	6	0	6	6	6	0
0000011011001011	8.96521	8.99694	8.98108	0.0158678	6	6	6	0	7.64357	7.2699	7.45673	0.186835
0000011011001100	8.9513	8.92627	8.93878	0.0125117	6	6	6	0	6	6	6	0
0000011011001101	8.95933	8.91499	8.93716	0.0221685	6	6	6	0
0000011011001110	8.84692	8.84863	8.84778	0.000857223	6	6	6	0	6	6	6	0
0000011011001111	8.9719	8.96281	8.96735	0.00454646	6	6	6	0	7.64578	7.65671	7.65124	0.00546235
0000011011010000	8.88357	8.88615	8.88486	0.00128979	6	6	6	0
0000011011010001	8.98733	8.92445	8.95589	0.03144	6.14367	6	6.07184	0.0718357	7.60612	8.13467	7.8704	0.264274
0000011011010010	8.7245	8.69422	8.70936	0.0151364	6	6	6	0	6	6	6	0
0000011011010011	8.94351	8.95283	8.94817	0.00465945	6	6	6	0	7.74127	7.74725	7.74426	0.00298869
0000011011010100	8.85686	8.83572	8.84629	0.0105686	6	6	6	0	7.04364	6.95216	6.9979	0.0457403
0000011011010101	8.91806	8.88722	8.90264	0.0154219	6	6	6	0	7.81141	7.77059	7.791	0.020412
0000011011010110	8.67082	8.67348	8.67215	0.00133037	6	6	6	0	6	6	6	0
0000011011010111	8.97276	8.97239	8.97258	0.000186671	6	6	6	0	8.51899	8.09497	8.30698	0.21201
0000011011011000	8.92726	8.91977	8.92352	0.00374038	6	6	6	0	8.01518	7.74236	7.87877	0.136407
0000011011011001	8.95698	9.03256	8.99477	0.0377901	6	6	6	0	8.07658	8.14659	8.11158	0.0350082
0000011011011010	8.80118	8.717	8.75909	0.0420895	6	6	6	0	6	6	6	0
0000011011011011	8.99292	8.83102	8.91197	0.0809525	6	6	6	0	7.5994	7.55566	7.57753	0.0218695
0000011011011100	8.80853	8.85371	8.83112	0.0225868	6	6	6	0
0000011011011101	8.96128	8.96724	8.96426	0.00298414	6	6	6	0	8.04888	7.67833	7.8636	0.185278
0000011011011110	8.73782	8.79627	8.76705	0.0292219	6	6	6	0
0000011011011111	8.95513	8.98621	8.97067	0.0155399	6	6	6	0	8.28314	7.47564	7.87939	0.403751
0000011011100000	9.36583	9.39952	9.38268	0.0168445	6.96016	7.39829	7.17923	0.219068	8.91724	8.96478	8.94101	0.0237717
0000011011100001	9.41552	9.38085	9.39819	0.0173355	7.25263	7.14294	7.19779	0.0548429	9.20725	9.15103	9.17914	0.02811
0000011011100010	9.12175	9.11969	9.12072	0.00102964					8.74162	8.59633	8.66898	0.0726446
0000011011100011	9.42457	9.45751	9.44104	0.0164683	7.56459	7.31882	7.4417	0.122888	9.31904	9.18051	9.24977	0.0692635
0000011011100100	9.34511	9.35466	9.34989	0.00477617	7.13713	7.65944	7.39828	0.261155	9.02242	9.00624	9.01433	0.0080938
0000011011100101	9.40976	9.34387	9.37681	0.0329459	6.98466	7.3834	7.18403	0.199371	9.05881	9.17749	9.11815	0.0593398
0000011011100110	9.21015	9.20037	9.20526	0.00489229	6.41795	6	6.20898	0.208977	8.73268	8.64892	8.6908	0.0418824
0000011011100111	9.47431	9.48256	9.47844	0.00412629	7.2479	7.2237	7.2358	0.0121003	9.22956	9.23075	9.23015	0.000599074
0000011011101000	9.36715	9.2795	9.32332	0.0438244	6.39645	7.21261	6.80453	0.408079	8.87445	8.91283	8.89364	0.0191879
0000011011101001	9.47453	9.43337	9.45395	0.0205799	6.97238	7.44498	7.20868	0.236299	9.09186	9.22169	9.15678	0.0649123
0000011011101010	9.31095	9.22979	9.27037	0.0405778	6.61358	7.40184	7.00771	0.394131	8.71657	8.74872	8.73265	0.0160749
0000011011101011	9.51768	9.53221	9.52495	0.00726293	7.52495	7.32182	7.42338	0.101563	9.25113	9.11126	9.18119	0.0699352
0000011011101100	9.37784	9.37522	9.37653	0.00131018	6.95174	7.33103	7.14139	0.189646	9.04334	9.04381	9.04357	0.000232027
0000011011101101	9.41555	9.39602	9.40578	0.00976409	7.30991	7.85435	7.58213	0.272222	9.20111	9.29489	9.248	0.0468895
0000011011101110	9.319	9.29552	9.30726	0.0117394	6.50503	7.3658	6.93541	0.430385	8.81746	8.93902	8.87824	0.0607812
0000011011101111	9.46663	9.5006	9.48361	0.0169806	7.45241	7.61481	7.53361	0.0812021	9.24254	9.24059	9.24156	0.000977026
0000011011110000	9.35699	9.3562	9.35659	0.000390787	6.4439	7.2541	6.849	0.4051	9.02928	8.85125	8.94027	0.0890144
0000011011110001	9.43707	9.36768	9.40237	0.0346961	7.32615	6.94443	7.13529	0.190858	9.07287	9.18575	9.12931	0.0564424
0000011011110010	9.07109	9.16391	9.1175	0.046409	7.26971	7.29614	7.28293	0.0132146	8.75407	8.70195	8.72801	0.0260625
0000011011110011	9.42373	9.40326	9.41349	0.0102354	7.22668	7.39969	7.31319	0.0865063	9.24734	9.27046	9.2589	0.0115561
0000011011110100	9.40826	9.38135	9.39481	0.0134558	7.44211	7.33943	7.39077	0.0513417	9.1	9.01521	9.0576	0.0423945
0000011011110101	9.34106	9.35828	9.34967	0.0086107	7.3856	6.84267	7.11414	0.271466	9.0956	8.98782	9.04171	0.0538898
0000011011110110	9.11025	9.07499	9.09262	0.0176308	6.80163	6.38363	6.59263	0.209	8.809	8.63404	8.72152	0.0874794
0000011011110111	9.43165	9.42411	9.42788	0.00377091	7.16796	7.40886	7.28841	0.120451	9.17084	9.14052	9.15568	0.0151571
0000011011111000	9.31791	9.27955	9.29873	0.0191795	6.2099	6.6352	6.42255	0.212649	9.08116	9.10988	9.09552	0.0143589
0000011011111001	9.43302	9.44177	9.43739	0.00437572	7.14478	7.04408	7.09443	0.0503535	9.13926	9.13786	9.13856	0.000701782
0000011011111010	9.21978	9.15455	9.18716	0.032619					8.9569	8.7337	8.8453	0.111597
0000011011111011	9.376	9.30722	9.34161	0.0343903	7.27555	7.62559	7.45057	0.175016	9.15978	9.18461	9.1722	0.0124134
0000011011111100	9.40906	9.30096	9.35501	0.0540493	6.68024	7.02658	6.85341	0.173173	9.05462	9.10017	9.07739	0.0227719
0000011011111101	9.52878	9.36879	9.44879	0.079993	6.85928	7.32488	7.09208	0.2328	9.17825	9.12264	9.15045	0.0278035
0000011011111110	9.14885	9.15026	9.14955	0.000704765	6	6.78939	6.39469	0.394693	8.82166	8.62204	8.72185	0.0998125
0000011011111111	9.4546	9.31488	9.38474	0.0698619	6.6786	7.65227	7.16544	0.486836	9.19187	9.22844	9.21015	0.0182842
0000011100000000	8.96479	8.93849	8.95164	0.0131492	6	6	6	0	6	6	6	0
0000011100000001	8.93947	8.89299	8.91623	0.0232437	6	6	6	0	6	6.78263	6.39131	0.391313
0000011100000010	8.83477	8.75977	8.79727	0.0375028	6	6	6	0	6	6	6	0
0000011100000011	8.90649	8.89169	8.89909	0.00740147	6	6	6	0
0000011100000100	8.96142	8.93483	8.94812	0.0132959	6	6	6	0	6	6	6	0
0000011100000101	8.93994	8.93535	8.93764	0.00229349	6	6	6	0	6	6	6	0
0000011100000110	8.80561	8.70583	8.75572	0.04989	6	6	6	0	6	6	6	0
0000011100000111	8.94664	8.93981	8.94323	0.00341781	6	6	6	0	6	6.8389	6.41945	0.419452
0000011100001000	8.97115	8.90609	8.93862	0.0325341	6	6	6	0	6	6	6	0
0000011100001001	8.95852	8.94877	8.95364	0.00487568	6	6	6	0	6	6	6	0
0000011100001010	8.84815	8.89024	8.8692	0.021044	6	6	6	0	6	6	6	0
0000011100001011	8.97755	8.93918	8.95837	0.0191861	6	6	6	0	6	6.84638	6.42319	0.423191
0000011100001100	8.96751	8.90626	8.93689	0.0306255	6	6	6	0	6	6	6	0
0000011100001101	9.03028	9.02164	9.02596	0.00431847	6	6	6	0
0000011100001110	8.85487	8.96988	8.91237	0.0575021	6	6	6	0	6	6	6	0
0000011100001111	9.00356	8.95275	8.97816	0.0254049	6	6	6	0
0000011100010000	8.88245	8.85605	8.86925	0.0131993	6	6	6	0	6	6	6	0
0000011100010001	8.95645	8.91911	8.93778	0.0186727	6	6	6	0	6	6	6	0
0000011100010010	8.77523	8.72505	8.75014	0.0250897	6	6	6	0	6	6	6	0
0000011100010011	8.97877	8.90885	8.94381	0.0349612	6	6	6	0	6	6	6	0
0000011100010100	8.95772	8.96721	8.96247	0.00474464	6	6	6	0	6	6	6	0
0000011100010101	8.90899	8.90512	8.90705	0.00193595	6	6	6	0	6	6	6	0
0000011100010110	8.83079	8.79089	8.81084	0.0199491	6	6	6	0	6	6	6	0
0000011100010111	8.89199	8.95306	8.92252	0.0305326	6	6	6	0	6	6	6	0
0000011100011000	8.97928	8.94178	8.96053	0.0187506	6	6	6	0	6	6	6	0
0000011100011001	8.97449	8.98829	8.98139	0.00689949	6	6	6	0	6	6	6	0
0000011100011010	8.84171	8.83036	8.83604	0.00567114	6	6	6	0	6	6	6	0
0000011100011011	8.97594	8.96237	8.96915	0.00678576	6	6	6	0	6		6	0
0000011100011100	8.91617	8.86874	8.89245	0.0237167	6	6	6	0	6	6	6	0
0000011100011101	8.98004	9.02724	9.00364	0.0236002	6	6	6	0	6	6	6	0
0000011100011110	8.85105	8.82528	8.83816	0.0128872	6	6	6	0	6	6	6	0
0000011100011111	9.00252	8.99315	8.99784	0.00468512	6	6	6	0
0000011100100000	9.4891	9.54683	9.51797	0.0288631	6	6.97386	6.48693	0.486929	9.11881	9.0393	9.07906	0.039755
0000011100100001	9.56006	9.51269	9.53638	0.0236832	7.4641	6.96247	7.21329	0.250812	9.18341	9.21393	9.19867	0.0152632
0000011100100010	9.25808	9.26975	9.26392	0.00583275	6	6	6	0	8.62527	8.67399	8.64963	0.0243616
0000011100100011	9.61714	9.58317	9.60015	0.0169857	7.62999	7.29187	7.46093	0.169063	9.37714	9.16252	9.26983	0.107307
0000011100100100	9.48035	9.55267	9.51651	0.0361585					9.18971	9.06428	9.12699	0.0627162
0000011100100101	9.53021	9.58698	9.55859	0.0283855	6.57784	7.15867	6.86825	0.290417	9.17082	9.22828	9.19955	0.0287275
0000011100100110	9.30826	9.42132	9.36479	0.056534	6.96279	6.52804	6.74541	0.217375	8.91392	8.8008	8.85736	0.0565575
0000011100100111	9.59268	9.49463	9.54366	0.0490243	7.38954	7.26424	7.32689	0.0626468	9.36321	9.35182	9.35751	0.00569702
0000011100101000	9.50903	9.52045	9.51474	0.005706	6.61225	7.10872	6.86049	0.248234	8.93476	9.03168	8.98322	0.0484596
0000011100101001	9.52452	9.51197	9.51825	0.00627318	7.33696	7.35139	7.34417	0.00721316	9.18872	9.03824	9.11348	0.0752418
0000011100101010	9.40206	9.41724	9.40965	0.00759222	6	6.23612	6.11806	0.118061	9.01931	8.76441	8.89186	0.127453
0000011100101011	9.61144	9.56714	9.58929	0.0221497	7.40426	7.30786	7.35606	0.0481991	9.33466	9.24848	9.29157	0.0430893
0000011100101100	9.48976	9.4143	9.45203	0.0377301	6.12464	7.00957	6.56711	0.442468	8.98234	8.91543	8.94888	0.0334556
0000011100101101	9.58791	9.60952	9.59872	0.0108039	6.75177	7.15075	6.95126	0.19949	9.2523	9.04195	9.14713	0.105176
0000011100101110	9.41948	9.35414	9.38681	0.0326722	6.40159	7.22687	6.81423	0.412639	8.73846	8.85864	8.79855	0.0600883
0000011100101111	9.64065	9.71798	9.67932	0.0386642	7.33703	7.35443	7.34573	0.0087015	9.19271	9.26644	9.22957	0.0368637
0000011100110000	9.48041	9.52772	9.50406	0.0236534	6.45864	7.07089	6.76477	0.306128	9.07364	9.04633	9.05998	0.0136532
0000011100110001	9.58356	9.51627	9.54991	0.0336469	7.15309	7.06926	7.11118	0.0419136	9.23038	9.17313	9.20176	0.0286273
0000011100110010	9.28712	9.34324	9.31518	0.0280589	6.76071	6.16682	6.46376	0.296943	8.70246	8.71216	8.70731	0.00484838
0000011100110011	9.56929	9.53921	9.55425	0.0150384	7.35132	7.41698	7.38415	0.032832	9.34184	9.24763	9.29474	0.0471076
0000011100110100	9.48286	9.47383	9.47834	0.00451774	7.08857	7.2158	7.15219	0.0636159	9.17009	9.11155	9.14082	0.0292696
0000011100110101	9.52948	9.51845	9.52396	0.00551731	7.1087	7.18486	7.14678	0.0380834	9.24387	9.27144	9.25766	0.0137853
0000011100110110	9.33977	9.3085	9.32414	0.0156355	6.4752	6.68374	6.57947	0.104271	8.83413	8.69495	8.76454	0.0695879
0000011100110111	9.54861	9.52443	9.53652	0.0120875	7.51038	7.23012	7.37025	0.140134	9.17857	9.4272	9.30289	0.124316
0000011100111000	9.49432	9.52039	9.50736	0.0130322	6.72263	7.15411	6.93837	0.215742	9.04094	9.11058	9.07576	0.0348197
0000011100111001	9.58554	9.50562	9.54558	0.0399586	7.01295	7.35238	7.18267	0.169715	9.16706	9.1828	9.17493	0.00786917
0000011100111010	9.43203	9.32599	9.37901	0.0530191	6.25199	7.0438	6.64789	0.395906	8.85886	8.75638	8.80762	0.0512405
0000011100111011	9.63703	9.51094	9.57398	0.0630415	7.57499	7.26192	7.41845	0.156535	9.31275	9.1418	9.22727	0.0854762
0000011100111100	9.49239	9.45394	9.47316	0.0192258	6.58569	6.55559	6.57064	0.0150531	9.20355	9.28255	9.24305	0.0394982
0000011100111101	9.51543	9.50009	9.50776	0.00767056	7.04843	7.03426	7.04134	0.00708485	9.19986	9.20008	9.19997	0.000107628
0000011100111110	9.44266	9.39105	9.41686	0.0258031	6	6.76261	6.3813	0.381304	8.96072	8.80145	8.88108	0.0796323
0000011100111111	9.57591	9.63895	9.60743	0.0315215	7.20324	7.45925	7.33125	0.128005	9.33982	9.3492	9.34451	0.00468828
0000011101000000	9.23249	9.1311	9.1818	0.0506939	6	6	6	0	7.38867	7.54158	7.46512	0.0764592
0000011101000001	9.31659	9.2016	9.25909	0.0574911	6	6	6	0	7.69371	7.63115	7.66243	0.0312834
0000011101000010	9.0222	9.04732	9.03476	0.0125563	6	6	6	0
0000011101000011	9.35647	9.23609	9.29628	0.0601882	6	6	6	0	7.77916	7.75566	7.76741	0.0117495
0000011101000100	9.27591	9.2481	9.262	0.0139055	6	6	6	0	8.25739	7.77718	8.01729	0.240105
0000011101000101	9.27241	9.39171	9.33206	0.0596466	6	6	6	0	7.80168	7.75734	7.77951	0.0221672
0000011101000110	9.08958	9.08899	9.08928	0.000294923	6	6	6	0	7.82933	7.63649	7.73291	0.0964206
0000011101000111	9.31825	9.36777	9.34301	0.0247605	6	6	6	0	7.68772	7.90767	7.7977	0.109979
0000011101001000	9.25358	9.25203	9.2528	0.000776289	6	6	6	0
0000011101001001	9.42971	9.34355	9.38663	0.0430809	6	6	6	0	7.52619	7.48383	7.50501	0.0211778
0000011101001010	9.12322	9.16874	9.14598	0.0227622	6	6	6	0	7.4899	7.72244	7.60617	0.116271
0000011101001011	9.38032	9.37688	9.3786	0.00171943	6	6	6	0	8.06654	8.09165	8.0791	0.0125534
0000011101001100	9.29957	9.31327	9.30642	0.00685324	6	6	6	0
0000011101001101	9.31881	9.30821	9.31351	0.00530219	6	6	6	0	8.47421	7.98599	8.2301	0.24411
0000011101001110	9.12124	9.21898	9.17011	0.04887	6	6	6	0	8.00762	7.70887	7.85824	0.149372
0000011101001111	9.38139	9.36305	9.37222	0.00917068	6	6	6	0	8.06908	7.86331	7.96619	0.102888
0000011101010000	9.39913	9.32177	9.36045	0.0386772	6	6	6	0	7.59549	7.85774	7.72661	0.131123
0000011101010001	9.38598	9.37965	9.38282	0.00316721	6	6	6	0	7.63766	7.57927	7.60847	0.029197
0000011101010010	9.15103	9.12652	9.13878	0.0122548	6	6	6	0	7.45748	7.70197	7.57973	0.122246
0000011101010011	9.45657	9.48473	9.47065	0.0140822	6	6	6	0	7.95104	7.74802	7.84953	0.101508
0000011101010100	9.4596	9.33489	9.39724	0.0623514	6	6	6	0	7.91402	8.00808	7.96105	0.047031
0000011101010101	9.41202	9.54584	9.47893	0.0669087	6	6	6	0	7.59297	7.56423	7.5786	0.0143688
0000011101010110	9.15484	9.11647	9.13566	0.019189	6	6	6	0	7.47826	7.39965	7.43895	0.0393012
0000011101010111	9.49146	9.50529	9.49837	0.00691228	6	6	6	0	7.66997	7.64294	7.65646	0.0135149
0000011101011000	9.35912	9.30667	9.33289	0.0262216	6	6	6	0	7.22696	7.51625	7.37161	0.144649
0000011101011001	9.49476	9.43804	9.4664	0.0283586	6	6	6	0	7.57727	7.88762	7.73245	0.155177
0000011101011010	9.23076	9.2053	9.21803	0.012727	6	6	6	0	7.70859	7.35631	7.53245	0.176139
0000011101011011	9.53861	9.45277	9.49569	0.042918	6.21224	6	6.10612	0.106122	7.96865	7.65917	7.81391	0.154741
0000011101011100	9.38015	9.30666	9.3434	0.0367477	6	6	6	0	8.23611	7.61084	7.92348	0.312636
0000011101011101	9.47752	9.4382	9.45786	0.0196601	6	6	6	0	7.6269	7.71554	7.67122	0.0443231
0000011101011110	9.25873	9.28183	9.27028	0.0115516	6	6	6	0	7.93611	7.64589	7.791	0.145109
0000011101011111	9.55177	9.50863	9.5302	0.0215726	6	6	6	0	7.85576	7.74823	7.802	0.0537663
0000011101100000	9.72434	9.77001	9.74717	0.0228316	7.82119	7.71359	7.76739	0.0537996	9.60287	9.52591	9.56439	0.0384808
0000011101100001	9.81731	9.85259	9.83495	0.017643	7.66115	7.63044	7.64579	0.0153573	9.60277	9.66475	9.63376	0.0309899
0000011101100010	9.53809	9.6027	9.5704	0.0323068	8.04149	7.6602	7.85085	0.190645	9.39609	9.3338	9.36494	0.031146
0000011101100011	9.72039	9.84803	9.78421	0.0638232	8.27078	8.1925	8.23164	0.0391409	9.65742	9.74148	9.69945	0.0420266
0000011101100100	9.75898	9.81977	9.78937	0.0303978	7.77657	7.84006	7.80832	0.0317441	9.59046	9.5479	9.56918	0.0212765
0000011101100101	9.80323	9.9143	9.85877	0.0555337	7.95088	7.97682	7.96385	0.012967	9.53768	9.55006	9.54387	0.00619214
0000011101100110	9.67441	9.65634	9.66538	0.00903318	7.76032	7.67345	7.71689	0.0434315	9.4427	9.41405	9.42838	0.0143226
0000011101100111	9.75201	9.80779	9.7799	0.0278907	8.24339	8.10501	8.1742	0.0691905	9.58713	9.60336	9.59525	0.00811584
0000011101101000	9.70643	9.72674	9.71659	0.0101551	7.46126	7.62115	7.54121	0.0799442	9.50456	9.43309	9.46883	0.0357343
0000011101101001	9.77811	9.89554	9.83683	0.0587141	7.98529	7.9325	7.9589	0.0263943	9.61293	9.59105	9.60199	0.0109418
0000011101101010	9.69646	9.62554	9.661	0.0354619	7.63273	7.32217	7.47745	0.15528	9.39907	9.43419	9.41663	0.0175564
0000011101101011	9.75164	9.86154	9.80659	0.0549485	7.92787	8.03823	7.98305	0.0551822	9.67239	9.74996	9.71118	0.0387881
0000011101101100	9.77605	9.84274	9.80939	0.0333445	7.76766	7.5968	7.68223	0.0854335	9.68512	9.55243	9.61877	0.0663459
0000011101101101	9.79584	9.78516	9.7905	0.00533848	7.96417	7.60845	7.78631	0.177863	9.57653	9.58451	9.58052	0.00398866
0000011101101110	9.66965	9.70721	9.68843	0.0187817	7.7708	7.75939	7.7651	0.00570701	9.46075	9.43055	9.44565	0.0150998
0000011101101111	9.76952	9.80009	9.7848	0.0152867	8.17024	8.215	8.19262	0.0223809	9.63392	9.71108	9.6725	0.0385802
0000011101110000	9.72671	9.77202	9.74936	0.0226594	7.97829	7.96173	7.97001	0.00827912	9.57165	9.60357	9.58761	0.0159648
0000011101110001	9.70786	9.75024	9.72905	0.0211906	8.03994	8.19133	8.11564	0.0756935	9.65391	9.69395	9.67393	0.0200169
0000011101110010	9.60364	9.79253	9.69809	0.094445	7.61982	7.56371	7.59177	0.0280549	9.38489	9.43563	9.41026	0.0253679
0000011101110011	9.83369	9.92845	9.88107	0.0473804	8.39733	8.46909	8.43321	0.0358785	9.63995	9.73653	9.68824	0.0482903
0000011101110100	9.7523	9.82068	9.78649	0.0341856	7.95389	8.11032	8.0321	0.0782141	9.67365	9.64824	9.66094	0.012706
0000011101110101	9.74037	9.85508	9.79772	0.0573577	7.98155	8.06535	8.02345	0.0419002	9.66564	9.65199	9.65882	0.00682649
0000011101110110	9.56615	9.64286	9.60451	0.0383553	7.59127	7.66812	7.6297	0.0384247	9.46664	9.34921	9.40793	0.0587162
0000011101110111	9.78141	9.7934	9.7874	0.00599246	8.12371	8.38375	8.25373	0.130022	9.67658	9.6444	9.66049	0.0160897
0000011101111000	9.71599	9.74117	9.72858	0.0125925	7.66356	7.79225	7.7279	0.0643453	9.53521	9.48598	9.5106	0.0246109
0000011101111001	9.78025	9.84966	9.81496	0.0347043	7.96826	8.13941	8.05384	0.0855765	9.5763	9.62085	9.59858	0.0222768
0000011101111010	9.57742	9.64881	9.61311	0.0356952	7.58704	7.56091	7.57398	0.0130621	9.41547	9.42834	9.42191	0.00643188
0000011101111011	9.7809	9.90819	9.84455	0.0636463	8.21161	8.24138	8.22649	0.0148856	9.7031	9.72271	9.7129	0.00980516
0000011101111100	9.7045	9.77438	9.73944	0.0349424	7.75034	7.86737	7.80885	0.0585141	9.56472	9.58765	9.57618	0.0114657
0000011101111101	9.76594	9.82713	9.79653	0.0305912	7.81118	8.14396	7.97757	0.166391	9.66686	9.63525	9.65105	0.0158081
0000011101111110	9.57436	9.54909	9.56172	0.0126339	7.87759	7.66604	7.77181	0.105775	9.44333	9.42065	9.43199	0.0113405
0000011101111111	9.77428	9.85518	9.81473	0.0404493	8.24616	8.16043	8.20329	0.0428641	9.61503	9.65832	9.63668	0.0216447
0000011110000000	8.99253	8.8888	8.94066	0.0518658	6	6	6	0	6	6	6	0
0000011110000001	9.01762	9.00506	9.01134	0.00628176	6	6	6	0	6	6	6	0
0000011110000010	8.83932	8.73674	8.78803	0.051291	6	6	6	0	6	6	6	0
0000011110000011	8.96325	9.00687	8.98506	0.0218114	6	6	6	0	7.44135	7.2529	7.34713	0.0942259
0000011110000100	8.94381	8.86836	8.90609	0.0377286	6	6	6	0	6	6	6	0
0000011110000101	9.00285	8.98054	8.99169	0.0111565	6	6	6	0	6	6	6	0
0000011110000110	8.85932	8.81824	8.83878	0.0205398	6	6	6	0	6	6	6	0
0000011110000111	9.03395	8.889	8.96148	0.0724729	6	6	6	0	6.36897	7.26443	6.8167	0.447729
0000011110001000	8.95902	8.95486	8.95694	0.00207742	6	6	6	0	6	6	6	0
0000011110001001	8.97725	8.93198	8.95462	0.0226337	6	6	6	0	6	6	6	0
0000011110001010	8.86044	8.847	8.85372	0.00672195	6	6	6	0	6	6	6	0
0000011110001011	9.02894	9.03599	9.03247	0.00352348	6	6	6	0
0000011110001100	9.01555	8.9643	8.98993	0.0256259	6	6	6	0	6	6	6	0
0000011110001101	9.0078	8.9553	8.98155	0.0262482	6	6	6	0	6	6	6	0
0000011110001110	8.88098	8.919	8.89999	0.0190126	6	6	6	0	6	6	6	0
0000011110001111	8.97583	8.95462	8.96522	0.0106086	6	6	6	0	7.57044	7.3245	7.44747	0.122967
0000011110010000	8.97852	8.79779	8.88815	0.0903627	6	6	6	0	6	6	6	0
0000011110010001	8.98141	8.93182	8.95661	0.0247986	6	6	6	0	6	6	6	0
0000011110010010	8.70878	8.73758	8.72318	0.0143992	6	6	6	0	6	6	6	0
0000011110010011	9.02857	8.95968	8.99413	0.0344442	6	6	6	0
0000011110010100	8.98174	8.89041	8.93607	0.0456656	6	6	6	0	6	6	6	0
0000011110010101	9.05342	8.98338	9.0184	0.0350203	6	6	6	0
0000011110010110	8.83362	8.74157	8.78759	0.0460241	6	6	6	0	6	6	6	0
0000011110010111	9.00024	8.94252	8.97138	0.0288559	6	6	6	0
0000011110011000	8.96621	8.94689	8.95655	0.00965572	6	6	6	0	6	6	6	0
0000011110011001	9.01501	8.93657	8.97579	0.0392187	6	6	6	0	6	6	6	0
0000011110011010	8.85769	8.68825	8.77297	0.084721	6	6	6	0	6	6	6	0
0000011110011011	9.11076	8.95038	9.03057	0.0801884	6	6	6	0	6	6	6	0
0000011110011100	9.02485	8.88516	8.955	0.0698429	6	6	6	0	6	6	6	0
0000011110011101	8.97762	8.96769	8.97265	0.0049683	6	6	6	0	6	6	6	0
0000011110011110	8.89461	8.82304	8.85883	0.0357822	6	6	6	0	6	6	6	0
0000011110011111	9.05555	8.95436	9.00496	0.0505943	6	6	6	0	6	6	6	0
0000011110100000	9.52168	9.53956	9.53062	0.00894314	7.46287	7.02969	7.24628	0.21659	9.1158	9.19018	9.15299	0.037191
0000011110100001	9.61186	9.60119	9.60652	0.00533282	7.14782	7.17228	7.16005	0.0122313	9.27242	9.22272	9.24757	0.0248526
0000011110100010	9.40861	9.39947	9.40404	0.00456523	6.36586	7.06329	6.71457	0.348714	8.94943	8.92749	8.93846	0.0109696
0000011110100011	9.52786	9.66046	9.59416	0.0663023	7.53605	7.5136	7.52482	0.0112234	9.41251	9.51755	9.46503	0.0525198
0000011110100100	9.5618	9.64109	9.60145	0.0396443	6.8221	7.06217	6.94213	0.120033	9.29628	9.2098	9.25304	0.0432399
0000011110100101	9.55334	9.60839	9.58086	0.0275244	6.91976	7.24294	7.08135	0.161586	9.2559	9.3669	9.3114	0.0554988
0000011110100110	9.44904	9.49274	9.47089	0.0218473					8.85714	8.93116	8.89415	0.0370092
0000011110100111	9.58115	9.60496	9.59306	0.0119059	7.20093	7.33184	7.26639	0.0654544	9.41267	9.48512	9.44889	0.0362247
0000011110101000	9.58397	9.3529	9.46844	0.115533	7.24372	6.92353	7.08363	0.160094	9.08692	9.07259	9.07975	0.00716788
0000011110101001	9.61682	9.64985	9.63334	0.0165146	7.40833	7.54057	7.47445	0.0661188	9.24945	9.33591	9.29268	0.0432301
0000011110101010	9.45098	9.49097	9.47098	0.0199974	7.05298	7.37612	7.21455	0.161571	9.10884	9.00428	9.05656	0.052281
0000011110101011	9.64714	9.79257	9.71986	0.0727147	7.1813	7.32972	7.25551	0.0742105	9.32776	9.4448	9.38628	0.0585173
0000011110101100	9.54621	9.72273	9.63447	0.0882564	6.76594	7.27257	7.01926	0.253318	9.27237	9.08123	9.1768	0.0955729
0000011110101101	9.67197	9.65541	9.66369	0.00827695	7.39185	7.21572	7.30378	0.0880657	9.28095	9.24234	9.26165	0.0193071
0000011110101110	9.49758	9.49203	9.4948	0.00277758	6.4899	7.40637	6.94813	0.458238	8.95936	9.03743	8.99839	0.0390365
0000011110101111	9.64144	9.59656	9.619	0.0224371	7.52562	7.32805	7.42684	0.098784	9.40493	9.47371	9.43932	0.0343891
0000011110110000	9.53049	9.51573	9.52311	0.00737966	7.38281	7.13351	7.25816	0.124648	9.16098	9.24927	9.20513	0.0441451
0000011110110001	9.57678	9.63277	9.60478	0.0279949	7.32901	7.18257	7.25579	0.0732199	9.39877	9.28711	9.34294	0.0558342
0000011110110010	9.44993	9.36528	9.4076	0.0423212	6.89578	7.09866	6.99722	0.101441	8.87898	8.83404	8.85651	0.0224673
0000011110110011	9.62067	9.50488	9.56278	0.0578951	7.66195	7.40415	7.53305	0.128899	9.38305	9.38865	9.38585	0.00279908
0000011110110100	9.57611	9.54507	9.56059	0.0155227	7.19925	7.21784	7.20855	0.0092982	9.30164	9.19346	9.24755	0.054089
0000011110110101	9.55856	9.65035	9.60445	0.0458945	7.4303	7.25994	7.34512	0.0851785	9.3031	9.40706	9.35508	0.0519807
0000011110110110	9.43804	9.3683	9.40317	0.0348708	6.11302	6.862	6.48751	0.374487	8.81307	8.85131	8.83219	0.0191176
0000011110110111	9.62469	9.5889	9.60679	0.0178945	7.71946	7.29173	7.50559	0.213865	9.35789	9.46705	9.41247	0.0545799
0000011110111000	9.58553	9.52601	9.55577	0.0297616	6.52202	7.20067	6.86134	0.339324	9.20577	9.20267	9.20422	0.00154762
0000011110111001	9.58222	9.58409	9.58316	0.000937683	7.5588	7.65096	7.60488	0.0460839	9.3247	9.30461	9.31465	0.0100432
0000011110111010	9.4057	9.47119	9.43845	0.0327487	6.58173	7.08384	6.83279	0.251057	8.94479	8.95859	8.95169	0.00689853
0000011110111011	9.59001	9.63022	9.61011	0.0201035	7.24217	7.48662	7.3644	0.122222	9.41352	9.43392	9.42372	0.0101992
0000011110111100	9.51567	9.56682	9.54125	0.0255747	7.09222	7.32215	7.20719	0.114964	9.26217	9.20849	9.23533	0.0268424
0000011110111101	9.56167	9.71311	9.63739	0.0757197	7.26323	7.35972	7.31148	0.0482458	9.27693	9.22178	9.24936	0.0275741
0000011110111110	9.38928	9.41387	9.40158	0.0122948	7.00557	7.32044	7.163	0.157432	9.06711	8.97176	9.01943	0.0476759
0000011110111111	9.56316	9.49126	9.52721	0.0359499	7.83664	7.23723	7.53694	0.299701	9.42594	9.42351	9.42472	0.00121893
0000011111000000	9.26524	9.22446	9.24485	0.020392	6	6	6	0	7.70483	7.99765	7.85124	0.146412
0000011111000001	9.28843	9.26959	9.27901	0.00941781	6	6	6	0	7.5161	8.03264	7.77437	0.258273
0000011111000010	9.09248	9.03828	9.06538	0.0270991	6	6	6	0	7.23447	7.59236	7.41341	0.178946
0000011111000011	9.30735	9.36739	9.33737	0.0300221	6	6	6	0	7.87917	7.76327	7.82122	0.05795
0000011111000100	9.245	9.22946	9.23723	0.00777389	6	6	6	0	7.55465	7.74074	7.6477	0.0930468
0000011111000101	9.25972	9.24293	9.25132	0.00839606	6	6	6	0	7.66958	7.87455	7.77206	0.102485
0000011111000110	9.06852	9.11504	9.09178	0.0232618	6	6	6	0	7.53219	7.73242	7.6323	0.100113
0000011111000111	9.38419	9.27774	9.33096	0.0532253	6	6	6	0	7.51375	7.8471	7.68043	0.166673
0000011111001000	9.24511	9.13735	9.19123	0.0538792	6	6	6	0	7.74717	7.57673	7.66195	0.0852209
0000011111001001	9.28427	9.33439	9.30933	0.0250612	6	6	6	0	7.75726	7.7801	7.76868	0.0114158
0000011111001010	9.12666	9.05235	9.08951	0.0371531	6	6	6	0	6.76465	7.40206	7.08335	0.318702
0000011111001011	9.36312	9.39025	9.37669	0.0135663	6	6	6	0	7.60089	7.57775	7.58932	0.0115674
0000011111001100	9.19664	9.13504	9.16584	0.0308033	6	6	6	0	7.27448	7.67053	7.47251	0.198026
0000011111001101	9.31889	9.22111	9.27	0.0488937	6	6	6	0	7.75401	8.07831	7.91616	0.16215
0000011111001110	9.15176	9.23977	9.19576	0.0440039	6	6	6	0	7.73377	7.7142	7.72399	0.00978028
0000011111001111	9.51316	9.43686	9.47501	0.0381526	6	6	6	0	7.53197	8.04613	7.78905	0.257079
0000011111010000	9.28611	9.28457	9.28534	0.000766133	6	6	6	0	7.98513	7.50747	7.7463	0.238827
0000011111010001	9.38022	9.32118	9.3507	0.02952	6	6	6	0	7.62023	7.48264	7.55143	0.0687921
0000011111010010	9.05569	8.98371	9.0197	0.0359901	6	6	6	0	7.25554	7.5533	7.40442	0.148879
0000011111010011	9.35183	9.38682	9.36932	0.0174948	6.08972	6	6.04486	0.0448586	7.87519	8.10112	7.98815	0.112967
0000011111010100	9.28279	9.32148	9.30214	0.0193473	6	6	6	0	7.73629	7.64734	7.69182	0.044478
0000011111010101	9.34419	9.46889	9.40654	0.06235	6	6	6	0	7.75285	7.85613	7.80449	0.0516402
0000011111010110	9.03322	9.05371	9.04347	0.010241	6	6	6	0	7.23751	7.31554	7.27653	0.0390153
0000011111010111	9.3742	9.32084	9.34752	0.0266807	6	6	6	0	7.82892	7.61907	7.724	0.104924
0000011111011000	9.24402	9.18695	9.21548	0.0285314	6	6	6	0	7.79095	7.56583	7.67839	0.11256
0000011111011001	9.34602	9.43825	9.39214	0.0461134	6	6	6	0	8.046	7.65288	7.84944	0.19656
0000011111011010	9.21627	9.18619	9.20123	0.0150397	6	6	6	0	8.09621	7.17137	7.63379	0.462418
0000011111011011	9.39786	9.37104	9.38445	0.013406	6.3319	6	6.16595	0.16595	8.20652	7.7782	7.99236	0.214158
0000011111011100	9.24898	9.32534	9.28716	0.0381798	6	6	6	0	7.70199	7.50488	7.60344	0.0985552
0000011111011101	9.42511	9.36761	9.39636	0.0287478	6	6	6	0	7.86834	8.05448	7.96141	0.093072
0000011111011110	9.13685	9.22214	9.1795	0.0426416	6	6	6	0	7.66992	7.87289	7.7714	0.101486
0000011111011111	9.41468	9.43779	9.42624	0.0115556	6	6	6	0	7.62512	7.78742	7.70627	0.0811495
0000011111100000	9.74618	9.83663	9.79141	0.0452245	8.14519	8.15229	8.14874	0.00355141	9.60774	9.65582	9.63178	0.0240406
0000011111100001	9.78959	9.84544	9.81751	0.0279295	8.17852	8.21846	8.19849	0.0199686	9.63218	9.75238	9.69228	0.0601005
0000011111100010	9.65229	9.8328	9.74255	0.090255	7.79726	7.72308	7.76017	0.0370943	9.47619	9.48404	9.48012	0.00392528
0000011111100011	9.76167	9.78609	9.77388	0.0122097	8.30739	8.44915	8.37827	0.0708794	9.59109	9.68944	9.64027	0.0491758
0000011111100100	9.73397	9.669	9.70149	0.0324832	7.99886	8.14999	8.07443	0.0755656	9.63747	9.66963	9.65355	0.0160796
0000011111100101	9.7592	9.79837	9.77878	0.0195881	8.37144	8.2232	8.29732	0.0741189	9.65911	9.6146	9.63685	0.0222548
0000011111100110	9.6493	9.74735	9.69832	0.049024	8.01165	7.95898	7.98531	0.0263342	9.55353	9.53275	9.54314	0.010391
0000011111100111	9.83312	9.71461	9.77386	0.0592546	8.46254	8.6004	8.53147	0.0689297	9.68971	9.72432	9.70701	0.0173073
0000011111101000	9.77414	9.77614	9.77514	0.000997405	7.65666	7.76149	7.70908	0.0524124	9.55407	9.62535	9.58971	0.0356388
0000011111101001	9.75744	9.85423	9.80583	0.0483948	8.16781	8.23333	8.20057	0.0327572	9.54817	9.76731	9.65774	0.10957
0000011111101010	9.6753	9.78032	9.72781	0.0525106	7.72359	7.78615	7.75487	0.0312804	9.49495	9.54129	9.51812	0.0231724
0000011111101011	9.86254	9.88032	9.87143	0.00888777	8.54648	8.54571	8.5461	0.000382752	9.69104	9.73078	9.71091	0.0198687
0000011111101100	9.7789	9.85424	9.81657	0.0376686	7.70523	7.92409	7.81466	0.109432	9.61508	9.69395	9.65451	0.0394327
0000011111101101	9.77421	9.76689	9.77055	0.00366171	8.1265	8.21769	8.17209	0.0455968	9.70079	9.64254	9.67167	0.0291246
0000011111101110	9.70715	9.72214	9.71464	0.00749324	7.83931	8.06512	7.95221	0.112908	9.43995	9.52132	9.48063	0.0406835
0000011111101111	9.80986	9.85959	9.83472	0.0248645	8.53238	8.53274	8.53256	0.000181328	9.60949	9.79965	9.70457	0.0950775
0000011111110000	9.69351	9.83985	9.76668	0.0731677	7.97383	8.10159	8.03771	0.0638809	9.56752	9.5351	9.55131	0.0162113
0000011111110001	9.81766	9.86156	9.83961	0.0219494	8.43058	8.29036	8.36047	0.0701074	9.57728	9.72945	9.65337	0.0760866
0000011111110010	9.62176	9.67598	9.64887	0.0271076	7.78988	8.02582	7.90785	0.117972	9.45297	9.36734	9.41015	0.0428139
0000011111110011	9.84783	9.81478	9.8313	0.0165212	8.5083	8.63233	8.57032	0.0620155	9.68782	9.69431	9.69107	0.00324712
0000011111110100	9.649	9.73891	9.69396	0.0449544	8.34947	8.33516	8.34232	0.00715497	9.64124	9.6898	9.66552	0.0242825
0000011111110101	9.75563	9.71528	9.73546	0.0201713	8.15519	8.35041	8.2528	0.0976115	9.53352	9.74485	9.63918	0.105665
0000011111110110	9.59791	9.61897	9.60844	0.0105315	7.85754	8.04219	7.94986	0.0923271	9.45896	9.38259	9.42078	0.0381827
0000011111110111	9.77666	9.82486	9.80076	0.0241008	8.42007	8.54034	8.4802	0.0601375	9.73651	9.72955	9.73303	0.0034761
0000011111111000	9.61538	9.63503	9.6252	0.00982413	7.95133	8.04534	7.99833	0.0470055	9.48126	9.57916	9.53021	0.0489517
0000011111111001	9.77257	9.8225	9.79754	0.0249689	8.30165	8.31474	8.30819	0.00654018	9.6006	9.60654	9.60357	0.00296725
0000011111111010	9.64203	9.67078	9.6564	0.0143741	7.84575	7.75633	7.80104	0.0447118	9.4763	9.36259	9.41945	0.0568522
0000011111111011	9.80796	9.76128	9.78462	0.0233398	8.58299	8.56871	8.57585	0.00714052	9.67694	9.67796	9.67745	0.000510455
0000011111111100	9.82596	9.85807	9.84201	0.0160549	8.00523	8.10321	8.05422	0.048992	9.56587	9.51399	9.53993	0.02594
0000011111111101	9.776	9.86806	9.82203	0.0460295	8.29945	8.52719	8.41332	0.113869	9.58509	9.64839	9.61674	0.0316464
0000011111111110	9.68111	9.71356	9.69734	0.016228	8.01329	7.89988	7.95658	0.0567025	9.50658	9.36964	9.43811	0.0684695
0000011111111111	9.7265	9.75199	9.73924	0.0127422	8.62181	8.48283	8.55232	0.0694929	9.6528	9.66146	9.65713	0.00432849
0000100000000000	8.41078	8.42105	8.41591	0.00513677	6	6	6	0	6	6	6	0
0000100000000001	8.47697	8.44336	8.46017	0.016807	6	6	6	0	6	6	6	0
0000100000000010	8.27208	8.14749	8.20978	0.0622942	6	6	6	0	6	6	6	0
0000100000000011	8.46549	8.4589	8.4622	0.00329463	6	6	6	0	6	6	6	0
0000100000000100	8.45466	8.40006	8.42736	0.0272998	6	6	6	0	6	6	6	0
0000100000000101	8.53317	8.33882	8.43599	0.0971774	6	6	6	0	6	6	6	0
0000100000000110	8.32211	8.24387	8.28299	0.0391189	6	6	6	0	6	6	6	0
0000100000000111	8.52807	8.40699	8.46753	0.0605364	6	6	6	0	6	6	6	0
0000100000001000	8.3975	8.48955	8.44353	0.0460246	6	6	6	0	6	6	6	0
0000100000001001	8.33238	8.61491	8.47364	0.141263	6	6	6	0	6	6	6	0
0000100000001010	8.40126	8.29352	8.34739	0.05387	6	6	6	0	6	6	6	0
0000100000001011	8.53943	8.53333	8.53638	0.0030492	6	6	6	0	6	6	6	0
0000100000001100	8.4864	8.4252	8.4558	0.0305973	6	6	6	0	6	6	6	0
0000100000001101	8.46026	8.45661	8.45843	0.00182168	6	6	6	0	6	6	6	0
0000100000001110	8.47395	8.38903	8.43149	0.0424594	6	6	6	0	6	6	6	0
0000100000001111	8.39525	8.42742	8.41134	0.0160849	6	6	6	0	6	6	6	0
0000100000010000	8.47736	8.37098	8.42417	0.0531895	6	6	6	0	6	6	6	0
0000100000010001	8.46859	8.44393	8.45626	0.012326	6	6	6	0	6	6	6	0
0000100000010010	8.27736	8.13563	8.20649	0.0708637	6	6	6	0	6	6	6	0
0000100000010011	8.45847	8.35488	8.40667	0.0517967	6	6	6	0	6	6	6	0
0000100000010100	8.43103	8.49476	8.4629	0.0318657	6	6	6	0	6	6	6	0
0000100000010101	8.35586	8.42138	8.38862	0.0327635	6	6	6	0	6	6	6	0
0000100000010110	8.33467	8.18821	8.26144	0.0732326	6	6	6	0	6	6	6	0
0000100000010111	8.41428	8.32123	8.36775	0.0465256	6	6	6	0	6	6	6	0
0000100000011000	8.47822	8.36557	8.42189	0.0563224	6	6	6	0	6	6	6	0
0000100000011001	8.45056	8.49966	8.47511	0.0245488	6	6	6	0	6	6	6	0
0000100000011010	8.28899	8.17823	8.23361	0.0553768	6	6	6	0	6	6	6	0
0000100000011011	8.52864	8.31183	8.42023	0.108406	6	6	6	0	6	6	6	0
0000100000011100	8.44517	8.38637	8.41577	0.0293988	6	6	6	0	6	6	6	0
0000100000011101	8.53832	8.42467	8.4815	0.0568262	6	6	6	0	6	6	6	0
0000100000011110	8.28517	8.26983	8.2775	0.00767053	6	6	6	0	6	6	6	0
0000100000011111	8.50011	8.41664	8.45837	0.0417393	6	6	6	0	6	6	6	0
0000100000100000	8.94807	8.9353	8.94169	0.00638596	6	6	6	0
0000100000100001	8.97917	8.95561	8.96739	0.011782	6	6	6	0
0000100000100010	8.8755	8.76321	8.81935	0.0561426	6	6	6	0
0000100000100011	8.99844	8.93471	8.96658	0.0318664	6	6	6	0	7.42424	7.28935	7.35679	0.0674445
0000100000100100	8.95183	9.03772	8.99478	0.0429474	6	6	6	0	7.88782	7.3322	7.61001	0.27781
0000100000100101	8.97718	8.91561	8.9464	0.0307855	6	6	6	0	7.48323	7.61522	7.54922	0.0659929
0000100000100110	8.83442	8.78742	8.81092	0.0234998	6	6	6	0
0000100000100111	8.95418	8.94701	8.95059	0.00358933	6	6	6	0	7.54696	7.56179	7.55437	0.00741519
0000100000101000	9.01575	9.04417	9.02996	0.0142141	6	6	6	0	8.0895	7.44128	7.76539	0.324113
0000100000101001	9.05908	9.05513	9.05711	0.00197449	6	6	6	0	7.53811	7.45597	7.49704	0.0410688
0000100000101010	8.88093	8.77436	8.82765	0.0532818	6	6	6	0
0000100000101011	9.07874	9.02259	9.05067	0.0280748	6	6	6	0	7.71331	7.58367	7.64849	0.064818
0000100000101100	9.04421	9.02379	9.034	0.0102104	6	6	6	0	8.0683	7.83421	7.95125	0.117046
0000100000101101	9.06794	9.0043	9.03612	0.0318232	6	6	6	0	8.49515	7.75259	8.12387	0.371282
0000100000101110	8.86981	8.87184	8.87082	0.00101115	6	6	6	0	7.75781	7.3816	7.5697	0.188105
0000100000101111	9.04613	8.93567	8.9909	0.0552272	6.73398	6	6.36699	0.36699	7.5514	7.32389	7.43764	0.113757
0000100000110000	9.00455	8.87338	8.93896	0.0655856	6	6	6	0	6.98725	7.54272	7.26498	0.277738
0000100000110001	9.00296	8.9324	8.96768	0.0352815	6	6	6	0	6.95673	7.0011	6.97891	0.0221858
0000100000110010	8.80414	8.88993	8.84703	0.0428965	6	6	6	0
0000100000110011	9.04733	9.04683	9.04708	0.000251439					7.69395	7.64962	7.67179	0.022165
0000100000110100	9.06168	9.01423	9.03796	0.0237281	6	6	6	0	7.01875	7.28675	7.15275	0.133999
0000100000110101	8.96742	9.03007	8.99874	0.0313276	6	6	6	0	7.58899	7.17567	7.38233	0.206662
0000100000110110	8.8721	8.84714	8.85962	0.0124806	6	6	6	0	7.1848	7.77191	7.47836	0.293554
0000100000110111	9.08592	8.99328	9.0396	0.0463203	6	6.96987	6.48494	0.484936	7.31407	7.8484	7.58123	0.267165
0000100000111000	9.02051	9.05081	9.03566	0.0151526	6	6	6	0	7.40203	7.6529	7.52746	0.125435
0000100000111001	9.0348	9.02057	9.02769	0.00711368	6	6.42122	6.21061	0.210612	7.25117	8.06468	7.65793	0.406756
0000100000111010	8.91817	8.81401	8.86609	0.0520814	6	6	6	0	7.52258	7.8608	7.69169	0.169111
0000100000111011	9.06491	9.05941	9.06216	0.00274686	6	6	6	0	7.84165	7.75785	7.79975	0.0419024
0000100000111100	8.99472	9.01794	9.00633	0.0116122	6	6	6	0
0000100000111101	9.03453	9.02174	9.02813	0.00639725	6	6	6	0	7.64869	7.60108	7.62489	0.0238071
0000100000111110	8.92869	8.86425	8.89647	0.0322226	6	6	6	0	7.35935	7.19351	7.27643	0.0829204
0000100000111111	9.02493	9.00467	9.0148	0.0101285					8.42645	7.88652	8.15648	0.269966
0000100001000000	8.68112	8.66364	8.67238	0.00873904	6	6	6	0	6	6	6	0
0000100001000001	8.71393	8.6353	8.67462	0.039312	6	6	6	0	6	6	6	0
0000100001000010	8.56778	8.57954	8.57366	0.00588215	6	6	6	0	6	6	6	0
0000100001000011	8.66297	8.68417	8.67357	0.0106012	6	6	6	0	6	6	6	0
0000100001000100	8.67669	8.65663	8.66666	0.0100284	6	6	6	0	6	6	6	0
0000100001000101	8.69112	8.67586	8.68349	0.00763278	6	6	6	0	6	6	6	0
0000100001000110	8.59597	8.55918	8.57758	0.0183913	6	6	6	0	6	6	6	0
0000100001000111	8.65815	8.69696	8.67755	0.0194083	6	6	6	0	6	6	6	0
0000100001001000	8.76882	8.72535	8.74708	0.0217323	6	6	6	0	6	6	6	0
0000100001001001	8.72421	8.88933	8.80677	0.0825569	6	6	6	0	6	6	6	0
0000100001001010	8.69557	8.65652	8.67604	0.0195261	6	6	6	0	6	6	6	0
0000100001001011	8.72824	8.68529	8.70677	0.0214779	6	6	6	0	6	6	6	0
0000100001001100	8.7571	8.68056	8.71883	0.0382703	6	6	6	0	6	6	6	0
0000100001001101	8.721	8.73451	8.72776	0.00675526	6	6	6	0	6	6	6	0
0000100001001110	8.67232	8.61788	8.6451	0.027221	6	6	6	0	6	6	6	0
[truncated: 63,536 more rows]

## Sheet: expression
geno	exp_rep1_norm	exp_rep2_norm	exp_norm_mean	exp_norm_sem
0000000000000000	1.04044	0.967049	1.00374	0.0366937
0000000000000001	0.999922	0.943114	0.971518	0.0284041
0000000000000010	1.04616	0.997917	1.02204	0.0241216
0000000000000011	1.04717	1.06897	1.05807	0.0108968
0000000000000100	1.04792	0.957467	1.00269	0.0452277
0000000000000101	0.981009	0.967534	0.974271	0.00673754
0000000000000110	1.03168	0.982937	1.00731	0.0243719
0000000000000111	1.00152	1.03075	1.01614	0.014611
0000000000001000	0.974367	0.986522	0.980445	0.00607788
0000000000001001	0.997774	1.00104	0.999409	0.00163561
0000000000001010	1.05626	0.939749	0.998004	0.0582545
0000000000001011	1.04283	0.943824	0.993327	0.0495033
0000000000001100	1.0562	1.00236	1.02928	0.0269176
0000000000001101	0.952774	0.980071	0.966423	0.0136485
0000000000001110	1.02144	1.00383	1.01263	0.00880333
0000000000001111	0.957803	1.04518	1.00149	0.0436882
0000000000010000	1.06709	1.00972	1.03841	0.0286831
0000000000010001	1.05511	0.980917	1.01801	0.0370972
0000000000010010	1.01063	1.04369	1.02716	0.0165321
0000000000010011	1.00454	1.03972	1.02213	0.0175901
0000000000010100	0.999323	0.97413	0.986726	0.0125967
0000000000010101	0.966923	0.98418	0.975551	0.00862848
0000000000010110	1.03566	0.910467	0.973063	0.0625958
0000000000010111	1.02004	1.03277	1.02641	0.00636599
0000000000011000	1.05911	1.05846	1.05879	0.000321061
0000000000011001	0.964035	1.04535	1.00469	0.040656
0000000000011010	1.02956	1.0048	1.01718	0.0123788
0000000000011011	1.10636	0.984444	1.0454	0.0609603
0000000000011100	1.06321	1.04462	1.05392	0.0092948
0000000000011101	1.02488	0.993004	1.00894	0.0159392
0000000000011110	1.06858	1.02638	1.04748	0.0210978
0000000000011111	1.05713	1.05664	1.05689	0.000241568
0000000000100000	1.01407	0.967212	0.99064	0.0234282
0000000000100001	0.995413	0.973888	0.98465	0.0107624
0000000000100010	1.03105	0.908073	0.969563	0.0614899
0000000000100011	1.00253	1.11284	1.05768	0.0551526
0000000000100100	0.964148	0.95978	0.961964	0.00218382
0000000000100101	1.02033	0.98485	1.00259	0.0177408
0000000000100110	0.983019	0.914377	0.948698	0.0343209
0000000000100111	0.952014	1.07828	1.01515	0.0631321
0000000000101000	0.90039	0.985139	0.942764	0.0423744
0000000000101001	0.991226	0.970895	0.98106	0.0101659
0000000000101010	0.961848	0.981836	0.971842	0.00999384
0000000000101011	1.03758	1.07469	1.05613	0.0185578
0000000000101100	0.938141	0.871063	0.904602	0.0335386
0000000000101101	0.940248	0.81218	0.876214	0.0640344
0000000000101110	0.998277	1.02516	1.01172	0.0134431
0000000000101111	1.00327	0.968028	0.98565	0.0176223
0000000000110000	1.06028	1.0702	1.06524	0.00496159
0000000000110001	0.965017	1.0091	0.987058	0.0220411
0000000000110010	1.09569	0.971851	1.03377	0.0619213
0000000000110011	0.995658	1.03473	1.01519	0.0195336
0000000000110100	0.997267	1.0388	1.01803	0.0207657
0000000000110101	1.07268	1.0625	1.06759	0.00509033
0000000000110110	0.962045	1.02437	0.993209	0.0311634
0000000000110111	1.02903	1.04733	1.03818	0.00915124
0000000000111000	0.990765	0.962824	0.976794	0.0139702
0000000000111001	0.975144	0.999464	0.987304	0.0121602
0000000000111010	0.921239	0.888602	0.904921	0.0163185
0000000000111011	1.08453	1.04127	1.0629	0.0216318
0000000000111100	1.00188	0.968937	0.985409	0.0164723
0000000000111101	1.03292	1.05379	1.04336	0.0104373
0000000000111110	0.922209	1.00702	0.964612	0.0424034
0000000000111111	1.04845	1.00932	1.02888	0.0195652
0000000001000000	1.02666	0.952456	0.989556	0.0371002
0000000001000001	0.962448	0.986398	0.974423	0.0119748
0000000001000010	0.994632	0.998711	0.996672	0.00203949
0000000001000011	0.975531	1.01592	0.995725	0.0201943
0000000001000100	0.930759	1.00316	0.966958	0.0361993
0000000001000101	0.971923	0.998309	0.985116	0.0131932
0000000001000110	0.940825	0.963262	0.952044	0.0112189
0000000001000111	0.969615	0.977102	0.973358	0.00374353
0000000001001000	0.940256	0.940058	0.940157	9.9157e-05
0000000001001001	0.984001	0.94449	0.964246	0.0197552
0000000001001010	0.914009	0.977793	0.945901	0.0318922
0000000001001011	1.05787	0.991008	1.02444	0.0334306
0000000001001100	0.955698	0.923212	0.939455	0.0162431
0000000001001101	0.96274	0.956345	0.959543	0.00319754
0000000001001110	0.948068	0.95317	0.950619	0.00255126
0000000001001111	0.991455	0.971281	0.981368	0.0100868
0000000001010000	0.98924	1.01581	1.00253	0.0132853
0000000001010001	0.984744	1.03251	1.00863	0.0238849
0000000001010010	1.04258	1.04124	1.04191	0.000667429
0000000001010011	1.04531	1.04346	1.04439	0.000922254
0000000001010100	1.01771	1.0009	1.0093	0.00840373
0000000001010101	0.995759	1.04381	1.01979	0.0240279
0000000001010110	0.997549	1.00571	1.00163	0.00408184
0000000001010111	1.04885	1.06846	1.05866	0.00980279
0000000001011000	1.05501	1.07297	1.06399	0.00897882
0000000001011001	1.03784	1.01214	1.02499	0.0128504
0000000001011010	1.08936	1.03227	1.06081	0.0285479
0000000001011011	1.05713	1.05031	1.05372	0.0034098
0000000001011100	0.952561	0.973237	0.962899	0.0103379
0000000001011101	1.00123	0.921709	0.961468	0.039759
0000000001011110	0.93239	1.03192	0.982154	0.0497645
0000000001011111	1.01131	1.11079	1.06105	0.0497404
0000000001100000	0.910655	0.915799	0.913227	0.00257189
0000000001100001	0.919446	0.899843	0.909645	0.00980139
0000000001100010	0.95116	0.986083	0.968622	0.0174611
0000000001100011	0.903186	0.971101	0.937144	0.0339575
0000000001100100	0.94111	0.917292	0.929201	0.0119091
0000000001100101	0.912171	0.963021	0.937596	0.0254248
0000000001100110	0.99921	0.99814	0.998675	0.000534889
0000000001100111	1.03671	0.997558	1.01714	0.0195772
0000000001101000	0.958512	0.928978	0.943745	0.0147672
0000000001101001	0.937428	0.929906	0.933667	0.00376084
0000000001101010	0.9294	0.923684	0.926542	0.0028583
0000000001101011	0.949182	0.926741	0.937962	0.0112203
0000000001101100	0.975618	0.918287	0.946952	0.0286654
0000000001101101	0.947662	0.902884	0.925273	0.022389
0000000001101110	0.926567	0.982796	0.954682	0.0281144
0000000001101111	1.00951	0.994081	1.0018	0.00771486
0000000001110000	0.902506	0.997522	0.950014	0.0475081
0000000001110001	0.910648	0.929339	0.919993	0.00934584
0000000001110010	1.03583	0.967456	1.00164	0.0341891
0000000001110011	0.986421	1.00849	0.997455	0.0110342
0000000001110100	0.969949	0.988597	0.979273	0.00932414
0000000001110101	1.00533	1.04604	1.02569	0.0203533
0000000001110110	1.00522	1.02362	1.01442	0.00919597
0000000001110111	1.02706	1.07165	1.04936	0.0222936
0000000001111000	0.960097	0.912155	0.936126	0.0239709
0000000001111001	0.962087	1.00529	0.983686	0.0215998
0000000001111010	1.00155	1.04669	1.02412	0.0225706
0000000001111011	1.02775	0.955589	0.991672	0.0360829
0000000001111100	0.989033	0.979907	0.98447	0.00456279
0000000001111101	0.961748	0.999421	0.980585	0.0188364
0000000001111110	0.997723	0.971337	0.98453	0.0131931
0000000001111111	1.03864	1.03065	1.03464	0.00399504
0000000010000000	1.01206	0.979838	0.995948	0.0161096
0000000010000001	1.07621	0.989724	1.03297	0.0432455
0000000010000010	1.04573	0.992252	1.01899	0.0267372
0000000010000011	1.0378	1.04459	1.0412	0.00339611
0000000010000100	1.02578	0.98737	1.00658	0.0192052
0000000010000101	1.02429	0.99941	1.01185	0.0124396
0000000010000110	1.00194	0.93632	0.969131	0.0328106
0000000010000111	1.05218	1.01218	1.03218	0.0199998
0000000010001000	1.03582	1.01489	1.02535	0.010465
0000000010001001	0.96414	1.05793	1.01104	0.0468967
0000000010001010	0.989681	0.978236	0.983958	0.00572288
0000000010001011	1.05755	1.09461	1.07608	0.0185322
0000000010001100	1.03563	1.00593	1.02078	0.0148477
0000000010001101	1.02895	1.01227	1.02061	0.00833914
0000000010001110	1.057	1.04376	1.05038	0.00662327
0000000010001111	1.08066	1.02745	1.05405	0.0266068
0000000010010000	1.07859	1.06619	1.07239	0.00619763
0000000010010001	1.03719	1.08251	1.05985	0.022661
0000000010010010	0.992519	0.987956	0.990238	0.00228173
0000000010010011	1.12442	1.07918	1.1018	0.0226204
0000000010010100	1.00118	1.07564	1.03841	0.0372276
0000000010010101	1.06003	1.07212	1.06608	0.0060438
0000000010010110	1.09489	1.05603	1.07546	0.0194339
0000000010010111	1.09645	1.10035	1.0984	0.00194978
0000000010011000	1.01625	1.07199	1.04412	0.0278719
0000000010011001	1.03615	1.08487	1.06051	0.0243569
0000000010011010	1.13339	1.02255	1.07797	0.0554202
0000000010011011	1.0475	1.10874	1.07812	0.0306204
0000000010011100	1.06118	1.0782	1.06969	0.00851113
0000000010011101	1.07176	0.989155	1.03046	0.041301
0000000010011110	1.03063	0.993022	1.01183	0.0188053
0000000010011111	0.976377	1.05502	1.0157	0.0393208
0000000010100000	1.02613	1.01772	1.02193	0.00420566
0000000010100001	1.05553	1.03444	1.04499	0.0105473
0000000010100010	0.974383	1.04183	1.00811	0.0337245
0000000010100011	1.02078	0.947817	0.984298	0.0364815
0000000010100100	1.06522	1.03675	1.05098	0.0142334
0000000010100101	0.962912	1.01019	0.986552	0.02364
0000000010100110	0.9942	0.979424	0.986812	0.007388
0000000010100111	1.01099	1.09157	1.05128	0.0402907
0000000010101000	0.942996	1.00515	0.974074	0.0310772
0000000010101001	1.0571	1.06159	1.05934	0.00224464
0000000010101010	1.0635	1.04597	1.05473	0.00876398
0000000010101011	1.03578	1.01553	1.02565	0.0101228
0000000010101100	1.04347	1.03864	1.04105	0.00241769
0000000010101101	1.06999	1.04818	1.05908	0.0109045
0000000010101110	1.05972	1.00545	1.03258	0.0271337
0000000010101111	1.03048	1.05571	1.04309	0.0126167
0000000010110000	0.988014	1.11065	1.04933	0.0613175
0000000010110001	1.04373	1.02464	1.03419	0.00954224
0000000010110010	1.03902	0.990906	1.01496	0.0240549
0000000010110011	1.02296	1.05539	1.03917	0.0162169
0000000010110100	0.967371	1.05723	1.0123	0.0449307
0000000010110101	1.06157	0.993258	1.02741	0.0341551
0000000010110110	0.981263	1.05392	1.01759	0.0363308
0000000010110111	1.03902	1.01	1.02451	0.0145108
0000000010111000	0.919125	0.986312	0.952719	0.0335938
0000000010111001	1.06403	1.00453	1.03428	0.02975
0000000010111010	1.02323	1.02787	1.02555	0.00232421
0000000010111011	0.952914	0.990358	0.971636	0.0187222
0000000010111100	0.976827	1.01936	0.998096	0.0212687
0000000010111101	1.07989	1.06386	1.07188	0.00801391
0000000010111110	1.03542	0.989242	1.01233	0.0230887
0000000010111111	0.959544	1.06375	1.01165	0.0521035
0000000011000000	0.965089	1.02211	0.9936	0.0285113
0000000011000001	1.03352	1.00301	1.01826	0.0152571
0000000011000010	1.0358	0.988615	1.01221	0.0235929
0000000011000011	0.944067	0.953395	0.948731	0.0046642
0000000011000100	1.00783	0.993746	1.00079	0.00704401
0000000011000101	1.03864	0.977791	1.00822	0.0304267
0000000011000110	1.02261	0.982401	1.00251	0.0201054
0000000011000111	1.00661	1.04706	1.02684	0.0202258
0000000011001000	1.00419	0.991608	0.997901	0.00629327
0000000011001001	0.867038	0.923076	0.895057	0.0280186
0000000011001010	1.0385	0.977382	1.00794	0.0305602
0000000011001011	0.975491	1.02006	0.997775	0.0222832
0000000011001100	1.02206	0.910503	0.966283	0.0557809
0000000011001101	0.989112	0.999966	0.994539	0.00542707
0000000011001110	0.956866	0.939619	0.948243	0.00862358
0000000011001111	1.05459	1.03968	1.04713	0.0074569
0000000011010000	1.03182	1.00101	1.01641	0.0154009
0000000011010001	1.00153	1.00728	1.0044	0.00287741
0000000011010010	1.04857	1.00668	1.02762	0.0209435
0000000011010011	1.05519	1.07831	1.06675	0.0115609
0000000011010100	0.971347	1.02967	1.00051	0.029162
0000000011010101	0.92489	1.06016	0.992525	0.0676351
0000000011010110	1.0853	0.951148	1.01822	0.0670763
0000000011010111	1.09838	1.0738	1.08609	0.0122903
0000000011011000	1.05862	1.00215	1.03039	0.0282368
0000000011011001	1.01201	1.04388	1.02794	0.0159343
0000000011011010	0.995467	1.0024	0.998934	0.00346673
0000000011011011	1.08306	1.07977	1.08141	0.00164547
0000000011011100	1.058	0.923237	0.990618	0.0673809
0000000011011101	0.954956	0.980995	0.967976	0.0130195
0000000011011110	0.970477	0.97716	0.973819	0.00334135
0000000011011111	1.06274	1.0963	1.07952	0.0167779
0000000011100000	0.996112	0.998333	0.997223	0.00111022
0000000011100001	1.03703	0.982624	1.00983	0.0272036
0000000011100010	0.982813	0.993475	0.988144	0.00533077
0000000011100011	1.05459	1.03058	1.04258	0.0120072
0000000011100100	0.966164	0.977071	0.971618	0.00545342
0000000011100101	0.935689	0.971938	0.953814	0.0181242
0000000011100110	1.04009	1.01531	1.0277	0.0123894
0000000011100111	0.993452	1.04009	1.01677	0.023317
0000000011101000	0.954721	0.976655	0.965688	0.0109666
0000000011101001	0.958779	0.982273	0.970526	0.0117471
0000000011101010	1.00586	0.959413	0.982637	0.023224
0000000011101011	0.950262	1.0912	1.02073	0.0704675
0000000011101100	0.939731	0.94839	0.94406	0.00432945
0000000011101101	0.979237	0.99982	0.989529	0.0102918
0000000011101110	1.0527	1.00215	1.02743	0.0252757
0000000011101111	0.947026	1.01892	0.982973	0.0359472
0000000011110000	1.03674	1.04156	1.03915	0.00241233
0000000011110001	1.01537	0.98051	0.997942	0.0174327
0000000011110010	0.930925	0.958454	0.94469	0.0137643
0000000011110011	1.06102	1.09927	1.08014	0.0191241
0000000011110100	1.03686	1.01206	1.02446	0.0124012
0000000011110101	0.920955	1.03767	0.979313	0.0583579
0000000011110110	1.02598	1.07119	1.04858	0.0226066
0000000011110111	1.02688	1.0607	1.04379	0.016913
0000000011111000	1.03339	0.977238	1.00531	0.0280759
0000000011111001	1.01752	1.00335	1.01043	0.00708897
0000000011111010	1.0122	0.977813	0.995008	0.0171958
0000000011111011	1.00049	1.0193	1.00989	0.00940508
0000000011111100	0.963372	0.930463	0.946917	0.0164547
0000000011111101	0.936379	1.04936	0.992868	0.0564895
0000000011111110	0.999784	1.03973	1.01976	0.0199719
0000000011111111	0.889378	1.05155	0.970464	0.0810859
0000000100000000	0.971175	0.971519	0.971347	0.000171909
0000000100000001	0.988975	1.03941	1.01419	0.0252157
0000000100000010	1.00222	0.926443	0.964333	0.0378899
0000000100000011	1.03928	1.04005	1.03967	0.000385658
0000000100000100	0.957091	0.994356	0.975723	0.0186323
0000000100000101	1.02808	1.01011	1.0191	0.0089854
0000000100000110	0.967954	0.990348	0.979151	0.0111969
0000000100000111	1.13314	1.06113	1.09714	0.0360044
0000000100001000	0.976617	1.00018	0.988401	0.011784
0000000100001001	1.01999	1.05528	1.03763	0.0176434
0000000100001010	1.0162	1.0146	1.0154	0.000801599
0000000100001011	1.11478	1.03947	1.07713	0.0376536
0000000100001100	1.04433	1.00541	1.02487	0.0194626
0000000100001101	0.939155	0.970372	0.954763	0.0156085
0000000100001110	1.03865	1.04893	1.04379	0.00513847
0000000100001111	1.04525	1.07727	1.06126	0.016012
0000000100010000	1.05301	1.08416	1.06859	0.015576
0000000100010001	1.02727	1.05165	1.03946	0.0121895
0000000100010010	1.02196	1.05864	1.0403	0.0183446
0000000100010011	1.05201	0.98824	1.02013	0.0318853
0000000100010100	0.988745	1.08276	1.03575	0.0470092
0000000100010101	1.06284	1.04648	1.05466	0.00818281
0000000100010110	1.05282	1.05241	1.05262	0.000204399
0000000100010111	0.977626	1.12075	1.04919	0.0715599
0000000100011000	1.04179	1.03276	1.03728	0.00451482
0000000100011001	1.06685	1.00551	1.03618	0.0306676
0000000100011010	1.00108	1.02198	1.01153	0.0104525
0000000100011011	1.06947	0.948331	1.0089	0.060572
0000000100011100	1.02363	1.10674	1.06518	0.0415565
0000000100011101	1.01058	1.02939	1.01999	0.00940645
0000000100011110	1.07021	1.10539	1.0878	0.0175897
0000000100011111	1.09162	1.11251	1.10206	0.0104425
0000000100100000	0.980668	0.96734	0.974004	0.00666402
0000000100100001	0.905371	0.966333	0.935852	0.0304807
0000000100100010	0.968491	1.00539	0.986942	0.0184512
0000000100100011	0.891487	1.02658	0.959033	0.0675461
0000000100100100	0.971241	1.02472	0.99798	0.026739
0000000100100101	0.931506	0.982644	0.957075	0.0255691
0000000100100110	1.03349	0.96343	0.998461	0.0350308
0000000100100111	0.988744	0.927496	0.95812	0.0306242
0000000100101000	1.02092	0.951087	0.986003	0.0349158
0000000100101001	0.977315	1.00751	0.992412	0.0150972
0000000100101010	0.971402	1.01194	0.99167	0.0202679
0000000100101011	0.932027	1.01792	0.974976	0.0429488
0000000100101100	0.908075	0.953685	0.93088	0.0228054
0000000100101101	1.03827	0.967987	1.00313	0.0351391
0000000100101110	1.01368	0.932719	0.9732	0.0404808
0000000100101111	1.00631	1.05425	1.03028	0.023971
0000000100110000	0.985593	1.02931	1.00745	0.0218591
0000000100110001	0.920518	1.0401	0.980311	0.0597926
0000000100110010	1.014	1.04982	1.03191	0.0179078
0000000100110011	1.02297	1.04943	1.0362	0.0132281
0000000100110100	0.925432	1.02271	0.974073	0.0486409
0000000100110101	0.969488	1.00125	0.985367	0.0158789
0000000100110110	1.06248	0.981851	1.02217	0.0403167
0000000100110111	1.07645	1.04427	1.06036	0.0160899
0000000100111000	1.00043	0.930699	0.965562	0.034863
0000000100111001	0.962916	0.948126	0.955521	0.00739499
0000000100111010	0.922149	0.983526	0.952838	0.0306885
0000000100111011	1.0327	1.0111	1.0219	0.0108
0000000100111100	1.01883	1.04202	1.03042	0.0115951
0000000100111101	1.02942	0.944492	0.986956	0.0424636
0000000100111110	0.998342	1.04363	1.02099	0.0226455
0000000100111111	1.05462	1.05294	1.05378	0.000841285
0000000101000000	1.00397	0.9712	0.987584	0.0163842
0000000101000001	1.05825	0.989692	1.02397	0.0342777
0000000101000010	1.03662	1.00611	1.02137	0.0152565
0000000101000011	1.04861	0.945945	0.997276	0.0513307
0000000101000100	0.9724	0.98784	0.98012	0.00772006
0000000101000101	0.966562	0.963762	0.965162	0.00139985
0000000101000110	1.00579	0.974996	0.990392	0.0153961
0000000101000111	1.02175	0.972618	0.997185	0.0245675
0000000101001000	0.975329	0.957758	0.966544	0.00878571
0000000101001001	1.04849	0.960784	1.00464	0.0438526
0000000101001010	0.995529	1.00511	1.00032	0.00479208
0000000101001011	1.04462	0.960707	1.00267	0.041959
0000000101001100	0.977957	0.915235	0.946596	0.0313611
0000000101001101	0.996703	0.942209	0.969456	0.027247
0000000101001110	0.971666	1.00486	0.988262	0.0165957
0000000101001111	1.03549	0.941407	0.988447	0.0470402
0000000101010000	0.993886	1.00293	0.998407	0.00452017
0000000101010001	0.96865	1.01857	0.993611	0.0249604
0000000101010010	0.983461	0.982251	0.982856	0.000604868
0000000101010011	1.0634	1.00516	1.03428	0.0291212
0000000101010100	0.949794	0.996507	0.973151	0.0233565
0000000101010101	1.06716	1.05803	1.06259	0.00456287
0000000101010110	1.08261	1.0049	1.04375	0.0388522
0000000101010111	1.14064	1.02618	1.08341	0.0572338
0000000101011000	0.935303	0.991924	0.963613	0.0283102
0000000101011001	1.01072	0.957395	0.984059	0.0266639
0000000101011010	0.95192	1.0015	0.976712	0.024792
0000000101011011	0.925758	1.00998	0.967867	0.0421089
0000000101011100	1.04627	0.936861	0.991566	0.0547055
0000000101011101	1.10715	0.964373	1.03576	0.0713873
0000000101011110	1.08229	0.978425	1.03036	0.0519314
0000000101011111	1.0952	1.01061	1.0529	0.0422919
0000000101100000	0.944132	0.869153	0.906642	0.0374895
0000000101100001	0.964588	0.88107	0.922829	0.041759
0000000101100010	0.943559	0.998898	0.971228	0.0276692
0000000101100011	0.970451	1.00149	0.985968	0.0155178
0000000101100100	0.948092	0.908473	0.928283	0.0198094
0000000101100101	0.954213	0.975145	0.964679	0.0104659
0000000101100110	0.999698	0.913539	0.956619	0.0430798
0000000101100111	0.880246	0.927067	0.903657	0.0234103
0000000101101000	0.942898	0.88536	0.914129	0.0287691
0000000101101001	0.980315	0.925312	0.952814	0.0275014
0000000101101010	0.995188	0.933142	0.964165	0.0310228
0000000101101011	0.939715	1.00737	0.973542	0.0338268
0000000101101100	1.01292	0.98125	0.997084	0.0158347
0000000101101101	0.984231	0.940658	0.962445	0.0217869
0000000101101110	1.00757	0.949866	0.978717	0.0288503
0000000101101111	0.898807	0.97549	0.937148	0.0383414
0000000101110000	0.955241	1.01508	0.985162	0.0299216
0000000101110001	0.961985	0.983956	0.97297	0.0109855
0000000101110010	1.00722	0.995673	1.00144	0.00577149
0000000101110011	0.964768	1.0597	1.01223	0.047467
0000000101110100	1.01105	0.977513	0.99428	0.016767
0000000101110101	1.00331	0.959639	0.981476	0.0218374
0000000101110110	1.05649	0.956622	1.00656	0.0499357
0000000101110111	1.0308	1.04489	1.03784	0.00704376
0000000101111000	1.00227	0.940843	0.971558	0.0307147
0000000101111001	0.937184	0.968692	0.952938	0.015754
0000000101111010	1.04376	0.884919	0.96434	0.0794214
0000000101111011	1.0203	0.992699	1.0065	0.0138015
0000000101111100	0.95668	0.958051	0.957366	0.000685719
0000000101111101	1.03577	0.98452	1.01014	0.0256246
0000000101111110	1.06311	0.979617	1.02136	0.0417453
0000000101111111	1.02604	0.943467	0.984756	0.0412887
0000000110000000	0.977066	1.02306	1.00006	0.022998
0000000110000001	0.970265	0.99774	0.984003	0.0137377
0000000110000010	1.05114	0.998739	1.02494	0.0261984
0000000110000011	1.07834	1.03973	1.05904	0.0193049
0000000110000100	1.01333	1.02442	1.01888	0.00554341
0000000110000101	1.02903	1.03246	1.03075	0.00171533
0000000110000110	1.03739	1.04713	1.04226	0.00487064
0000000110000111	0.983384	0.989276	0.98633	0.00294582
0000000110001000	1.00648	1.01595	1.01122	0.00473448
0000000110001001	0.977169	1.01441	0.995789	0.0186194
0000000110001010	1.00621	1.00487	1.00554	0.000672509
0000000110001011	1.05314	0.996888	1.02502	0.028128
0000000110001100	0.98575	0.991146	0.988448	0.00269774
0000000110001101	1.00635	1.014	1.01017	0.00382555
0000000110001110	1.03462	1.02569	1.03015	0.00446161
0000000110001111	1.02346	1.04853	1.03599	0.0125348
0000000110010000	1.05857	0.97032	1.01444	0.044125
0000000110010001	1.02013	1.06611	1.04312	0.0229862
0000000110010010	1.01398	1.04096	1.02747	0.0134924
0000000110010011	1.11597	1.03813	1.07705	0.0389217
0000000110010100	1.05185	1.00183	1.02684	0.025008
0000000110010101	1.02707	1.052	1.03953	0.0124622
0000000110010110	1.04472	0.964696	1.00471	0.0400141
0000000110010111	1.06648	1.0387	1.05259	0.0138915
0000000110011000	1.01928	1.01777	1.01852	0.000758266
0000000110011001	0.983462	1.03472	1.00909	0.0256273
0000000110011010	1.0544	0.949006	1.0017	0.0526949
0000000110011011	1.02367	1.04531	1.03449	0.0108227
0000000110011100	1.02773	1.00116	1.01445	0.0132875
0000000110011101	1.05708	0.992301	1.02469	0.0323891
0000000110011110	1.03359	1.01016	1.02187	0.0117188
0000000110011111	1.06054	1.07775	1.06914	0.00860582
0000000110100000	0.982658	0.981118	0.981888	0.000769871
0000000110100001	0.986641	0.951334	0.968987	0.0176534
0000000110100010	0.953287	1.029	0.991142	0.037855
0000000110100011	0.994954	1.0314	1.01318	0.0182235
0000000110100100	0.970322	0.983573	0.976948	0.00662552
0000000110100101	0.95874	0.970991	0.964866	0.00612559
0000000110100110	1.01163	0.984046	0.99784	0.013794
0000000110100111	0.986447	1.02604	1.00624	0.0197969
0000000110101000	0.971303	0.894352	0.932828	0.0384758
0000000110101001	0.958601	1.00097	0.979787	0.0211858
0000000110101010	1.00389	0.985121	0.994508	0.00938659
0000000110101011	0.985992	1.03579	1.01089	0.0248993
0000000110101100	0.983275	0.956847	0.970061	0.0132137
0000000110101101	0.969306	0.981239	0.975272	0.00596659
0000000110101110	1.00241	0.957007	0.979708	0.0227008
0000000110101111	1.02795	1.04888	1.03841	0.0104681
0000000110110000	0.997719	0.947867	0.972793	0.0249257
0000000110110001	0.995402	1.01594	1.00567	0.0102714
0000000110110010	0.961061	1.05461	1.00783	0.0467734
0000000110110011	1.00063	1.02382	1.01223	0.011597
0000000110110100	1.00668	1.06328	1.03498	0.0282956
0000000110110101	0.999725	1.02581	1.01277	0.0130414
0000000110110110	0.979361	1.034	1.00668	0.0273183
0000000110110111	1.0456	1.00164	1.02362	0.0219837
0000000110111000	0.996746	1.00831	1.00253	0.00578337
0000000110111001	0.998846	1.01269	1.00577	0.00692048
0000000110111010	1.01189	1.00017	1.00603	0.00585724
0000000110111011	0.951592	1.00236	0.976977	0.0253848
0000000110111100	1.07088	0.984393	1.02763	0.0432419
0000000110111101	1.01363	1.00597	1.0098	0.00383286
0000000110111110	1.01076	0.996728	1.00374	0.00701648
0000000110111111	1.02354	0.9195	0.971522	0.0520223
0000000111000000	0.951493	1.02579	0.988644	0.0371506
0000000111000001	0.923966	0.950788	0.937377	0.0134111
0000000111000010	1.01939	1.0158	1.0176	0.00179366
0000000111000011	1.01165	1.05152	1.03158	0.0199307
0000000111000100	0.968531	0.98788	0.978206	0.00967475
0000000111000101	1.00333	0.932145	0.967736	0.0355907
0000000111000110	0.975095	1.01531	0.9952	0.0201049
0000000111000111	1.04404	1.038	1.04102	0.00301809
0000000111001000	0.928055	0.994831	0.961443	0.033388
0000000111001001	0.965116	0.938989	0.952053	0.0130638
0000000111001010	0.980004	1.02047	1.00024	0.0202318
0000000111001011	0.931812	1.00896	0.970386	0.0385748
0000000111001100	0.950461	0.957405	0.953933	0.00347163
0000000111001101	1.00684	0.978513	0.992676	0.0141633
0000000111001110	0.972342	1.00105	0.986697	0.0143547
0000000111001111	1.08042	1.04911	1.06477	0.0156525
0000000111010000	1.00507	1.0037	1.00438	0.000686869
0000000111010001	1.002	1.09037	1.04618	0.0441843
0000000111010010	1.00557	1.07978	1.04268	0.0371045
0000000111010011	1.06774	1.01416	1.04095	0.0267919
0000000111010100	1.03185	1.02934	1.0306	0.00125402
0000000111010101	1.01823	1.0383	1.02827	0.0100385
0000000111010110	1.03917	1.01822	1.02869	0.0104755
0000000111010111	0.997977	1.00756	1.00277	0.00479015
0000000111011000	1.00063	1.01761	1.00912	0.00848825
0000000111011001	1.00064	1.01098	1.00581	0.00516704
0000000111011010	1.05437	1.00153	1.02795	0.0264159
0000000111011011	1.09021	1.04319	1.0667	0.0235088
0000000111011100	1.02803	1.0119	1.01997	0.0080653
0000000111011101	0.964764	1.01284	0.988799	0.0240358
0000000111011110	0.961092	0.933547	0.947319	0.0137724
0000000111011111	1.05378	1.05515	1.05446	0.00068888
0000000111100000	0.890254	0.946807	0.91853	0.0282766
0000000111100001	0.951226	0.961062	0.956144	0.00491804
0000000111100010	0.936279	0.952073	0.944176	0.00789745
0000000111100011	0.966545	1.02184	0.994192	0.0276465
0000000111100100	0.963291	0.958021	0.960656	0.00263467
0000000111100101	0.991496	0.942521	0.967008	0.0244874
0000000111100110	0.998908	1.01637	1.00764	0.00873008
0000000111100111	0.948544	1.0137	0.981123	0.0325795
0000000111101000	1.01135	0.973289	0.992318	0.0190296
0000000111101001	0.946819	0.929818	0.938318	0.00850054
0000000111101010	0.966409	0.955962	0.961186	0.00522357
0000000111101011	1.02566	0.972668	0.999162	0.0264939
0000000111101100	0.975859	0.939298	0.957578	0.0182806
0000000111101101	0.915928	0.982841	0.949384	0.0334565
0000000111101110	0.930105	0.929325	0.929715	0.000390293
0000000111101111	1.02512	0.923326	0.974222	0.050896
0000000111110000	0.989586	0.998145	0.993865	0.00427936
0000000111110001	0.987502	0.995752	0.991627	0.00412477
0000000111110010	1.00687	0.953445	0.980156	0.0267109
0000000111110011	1.02828	1.08524	1.05676	0.0284818
0000000111110100	1.01917	1.01182	1.01549	0.0036743
0000000111110101	1.02301	1.02991	1.02646	0.00344884
0000000111110110	0.972294	1.03864	1.00547	0.0331732
0000000111110111	1.06115	0.991851	1.0265	0.0346487
0000000111111000	1.00095	0.94001	0.970478	0.0304676
0000000111111001	1.01348	0.94496	0.979218	0.0342579
0000000111111010	0.96922	0.819548	0.894384	0.0748359
0000000111111011	1.06273	1.0305	1.04661	0.016117
0000000111111100	0.997587	1.00427	1.00093	0.00334105
0000000111111101	1.03057	0.973161	1.00186	0.0287019
0000000111111110	1.01263	0.922164	0.967398	0.0452343
0000000111111111	0.973339	1.03887	1.0061	0.032765
0000001000000000	1.1225	1.00318	1.06284	0.0596619
0000001000000001	0.995145	1.04228	1.01871	0.0235676
0000001000000010	1.03783	1.01177	1.0248	0.0130315
0000001000000011	1.03674	1.07898	1.05786	0.0211184
0000001000000100	1.02368	1.01861	1.02114	0.00253384
0000001000000101	1.06965	1.03591	1.05278	0.0168713
0000001000000110	1.07196	1.04054	1.05625	0.0157121
0000001000000111	1.10495	1.0644	1.08467	0.0202733
0000001000001000	1.01156	1.00384	1.0077	0.00385856
0000001000001001	1.05777	1.03616	1.04697	0.0108062
0000001000001010	1.01093	1.01692	1.01393	0.00299378
0000001000001011	0.962147	1.05143	1.00679	0.0446433
0000001000001100	1.064	1.009	1.0365	0.0275
0000001000001101	1.06255	1.0541	1.05832	0.00422327
0000001000001110	0.98483	0.893778	0.939304	0.0455261
0000001000001111	1.05309	1.03844	1.04577	0.00732382
0000001000010000	1.04787	1.00609	1.02698	0.0208899
0000001000010001	1.03409	1.00041	1.01725	0.0168369
0000001000010010	0.992738	0.97723	0.984984	0.00775379
0000001000010011	1.03837	1.01967	1.02902	0.00934776
0000001000010100	1.11637	1.00483	1.0606	0.055766
0000001000010101	0.922185	0.790422	0.856304	0.0658811
0000001000010110	1.04419	0.993368	1.01878	0.0254122
0000001000010111	1.07	1.04273	1.05637	0.0136363
0000001000011000	1.03248	1.03748	1.03498	0.00249876
0000001000011001	1.0327	0.992672	1.01269	0.0200159
0000001000011010	1.02271	1.0258	1.02426	0.00154521
0000001000011011	0.998916	1.03823	1.01857	0.0196569
0000001000011100	1.06778	0.964611	1.0162	0.0515866
0000001000011101	0.906008	0.971892	0.93895	0.0329421
0000001000011110	1.00728	1.02863	1.01796	0.0106749
0000001000011111	1.04306	1.04056	1.04181	0.00124766
0000001000100000	0.981563	0.985074	0.983318	0.00175512
0000001000100001	1.03615	1.02798	1.03206	0.00408463
0000001000100010	0.983572	1.07691	1.03024	0.0466709
0000001000100011	1.00987	1.06777	1.03882	0.0289535
0000001000100100	1.08951	1.05487	1.07219	0.0173218
0000001000100101	1.02729	1.01022	1.01875	0.00853371
0000001000100110	0.967229	1.05369	1.01046	0.0432311
0000001000100111	1.0588	1.03445	1.04662	0.0121766
0000001000101000	1.08138	1.04286	1.06212	0.0192618
0000001000101001	0.948833	1.06219	1.00551	0.0566804
0000001000101010	1.04979	0.955555	1.00267	0.0471197
0000001000101011	1.12319	1.12324	1.12321	2.72595e-05
0000001000101100	0.982771	1.01568	0.999223	0.0164519
0000001000101101	1.09539	1.02888	1.06213	0.0332564
0000001000101110	0.995682	0.967655	0.981668	0.0140131
0000001000101111	1.00389	1.02673	1.01531	0.0114194
0000001000110000	0.935799	0.979726	0.957762	0.0219631
0000001000110001	1.04086	1.07513	1.05799	0.0171348
0000001000110010	1.03692	1.05573	1.04632	0.0094073
0000001000110011	1.00836	1.07688	1.04262	0.0342611
0000001000110100	1.06075	1.02871	1.04473	0.0160189
0000001000110101	1.03606	1.07381	1.05494	0.0188759
0000001000110110	1.04847	1.08783	1.06815	0.0196771
0000001000110111	1.02572	1.12572	1.07572	0.0500022
0000001000111000	1.08847	0.984793	1.03663	0.0518376
0000001000111001	1.01454	1.0459	1.03022	0.0156824
0000001000111010	1.00522	1.00569	1.00546	0.000232769
0000001000111011	0.969796	1.08293	1.02636	0.0565654
0000001000111100	1.09704	0.989124	1.04308	0.0539573
0000001000111101	1.03212	1.00106	1.01659	0.0155293
0000001000111110	1.02479	1.01804	1.02141	0.00337687
0000001000111111	1.06916	0.991256	1.03021	0.0389512
0000001001000000	0.986515	1.00575	0.996134	0.00961814
0000001001000001	1.02414	0.982768	1.00345	0.0206833
0000001001000010	1.01137	0.925015	0.968191	0.0431763
0000001001000011	1.01284	1.00843	1.01064	0.0022071
0000001001000100	0.983935	1.01859	1.00126	0.0173292
0000001001000101	1.00514	0.980922	0.993031	0.0121086
0000001001000110	0.996373	1.03414	1.01526	0.0188857
0000001001000111	0.954376	1.02217	0.988272	0.0338958
0000001001001000	0.964378	0.989428	0.976903	0.0125254
0000001001001001	1.00422	0.947849	0.976036	0.0281876
0000001001001010	1.00937	0.953249	0.981308	0.0280589
0000001001001011	1.08848	1.04727	1.06788	0.020609
0000001001001100	0.973822	0.96666	0.970241	0.00358072
0000001001001101	0.929803	0.910483	0.920143	0.00965991
0000001001001110	0.948279	0.974447	0.961363	0.0130842
0000001001001111	1.01258	1.04123	1.0269	0.0143249
0000001001010000	1.11018	1.029	1.06959	0.0405896
0000001001010001	0.983022	1.07374	1.02838	0.045357
0000001001010010	1.00461	1.00684	1.00573	0.00111631
0000001001010011	1.06272	1.03475	1.04874	0.0139827
0000001001010100	1.03799	1.03346	1.03573	0.00226177
0000001001010101	1.03213	1.0783	1.05521	0.023083
0000001001010110	1.00505	1.01896	1.01201	0.00695439
0000001001010111	1.08397	1.04471	1.06434	0.0196272
0000001001011000	1.08913	0.915636	1.00238	0.0867456
0000001001011001	1.03226	1.00104	1.01665	0.0156125
0000001001011010	0.969948	1.07214	1.02104	0.0510965
0000001001011011	1.04504	1.02205	1.03355	0.0114967
0000001001011100	1.07066	1.03025	1.05045	0.0202057
0000001001011101	1.04892	1.05083	1.04987	0.000957605
0000001001011110	1.05868	0.911182	0.984932	0.0737509
0000001001011111	0.993118	1.07631	1.03472	0.0415977
0000001001100000	0.982736	0.947268	0.965002	0.0177338
0000001001100001	0.967546	1.00522	0.986383	0.0188361
0000001001100010	1.01253	0.974224	0.993379	0.0191547
0000001001100011	1.03729	1.04312	1.04021	0.00291659
0000001001100100	0.972488	0.955264	0.963876	0.00861204
0000001001100101	0.996266	0.911489	0.953877	0.0423885
0000001001100110	1.01557	1.03358	1.02457	0.00900389
0000001001100111	1.00412	0.938786	0.971454	0.0326678
0000001001101000	0.998149	0.940972	0.969561	0.0285884
0000001001101001	0.972024	0.869868	0.920946	0.0510778
0000001001101010	0.913824	0.905513	0.909669	0.00415546
0000001001101011	1.04986	0.995019	1.02244	0.0274212
0000001001101100	0.905795	0.976551	0.941173	0.035378
0000001001101101	0.863703	0.939997	0.90185	0.0381467
0000001001101110	1.05802	0.986314	1.02217	0.0358546
0000001001101111	0.987263	0.98414	0.985702	0.00156143
0000001001110000	1.05297	1.01678	1.03488	0.0180988
0000001001110001	1.03764	1.02482	1.03123	0.0064121
0000001001110010	1.03098	1.03599	1.03348	0.00250585
0000001001110011	1.00867	1.05072	1.0297	0.0210285
0000001001110100	0.98651	1.06464	1.02557	0.0390638
0000001001110101	1.02127	1.06548	1.04338	0.0221049
0000001001110110	1.00656	1.04252	1.02454	0.0179789
0000001001110111	1.11885	1.0284	1.07363	0.0452246
0000001001111000	1.03304	0.987502	1.01027	0.0227688
0000001001111001	0.995889	1.02692	1.01141	0.0155175
0000001001111010	1.00841	0.985882	0.997148	0.0112656
0000001001111011	1.01636	1.06625	1.04131	0.024943
0000001001111100	1.00667	1.03887	1.02277	0.0160988
0000001001111101	1.03754	1.05255	1.04504	0.00750236
0000001001111110	0.978581	1.07099	1.02478	0.0462028
0000001001111111	0.976276	1.10854	1.04241	0.0661324
0000001010000000	1.01581	1.01986	1.01783	0.00202556
0000001010000001	1.06439	1.07975	1.07207	0.00767956
0000001010000010	1.00812	1.02899	1.01856	0.010433
0000001010000011	1.04269	1.01434	1.02852	0.0141728
0000001010000100	1.00084	1.0612	1.03102	0.0301807
0000001010000101	1.06017	1.04979	1.05498	0.00518655
0000001010000110	0.987707	1.06116	1.02443	0.0367262
0000001010000111	1.06397	1.04678	1.05538	0.00859619
0000001010001000	0.993369	1.08904	1.04121	0.0478368
0000001010001001	1.06668	1.0441	1.05539	0.0112904
0000001010001010	1.07859	1.06029	1.06944	0.00914918
0000001010001011	1.03448	0.957016	0.995746	0.0387301
0000001010001100	1.04706	1.08902	1.06804	0.0209813
0000001010001101	1.02785	1.03259	1.03022	0.00236831
0000001010001110	1.07328	0.978831	1.02606	0.0472247
0000001010001111	1.06037	1.03039	1.04538	0.0149896
0000001010010000	1.09685	1.04711	1.07198	0.024872
0000001010010001	1.0759	1.02573	1.05082	0.0250837
0000001010010010	1.02652	1.01502	1.02077	0.00574902
0000001010010011	1.06927	1.09653	1.0829	0.0136304
0000001010010100	0.973514	1.08106	1.02729	0.0537744
0000001010010101	1.05564	1.05193	1.05379	0.00185298
0000001010010110	0.994714	1.06643	1.03057	0.0358605
0000001010010111	1.12121	1.1294	1.1253	0.00409265
0000001010011000	0.998697	1.00852	1.00361	0.00491281
0000001010011001	1.07462	1.12922	1.10192	0.0272995
0000001010011010	1.04873	0.9674	1.00807	0.0406665
0000001010011011	1.1071	1.1253	1.1162	0.00909944
0000001010011100	1.04607	1.10226	1.07417	0.0280907
0000001010011101	1.1041	1.03344	1.06877	0.0353268
0000001010011110	1.07206	1.08011	1.07608	0.00402835
0000001010011111	1.10816	1.06518	1.08667	0.0214871
0000001010100000	1.05246	1.06416	1.05831	0.00584882
0000001010100001	1.05084	0.844514	0.947677	0.103163
0000001010100010	1.03835	1.01695	1.02765	0.0106994
0000001010100011	1.03036	1.06231	1.04633	0.0159731
0000001010100100	1.01398	1.1215	1.06774	0.0537614
0000001010100101	1.0386	1.04452	1.04156	0.00296311
0000001010100110	1.01874	0.973036	0.995888	0.0228518
0000001010100111	1.06667	1.0222	1.04443	0.0222327
0000001010101000	1.02624	1.03768	1.03196	0.00572271
0000001010101001	0.992759	1.01565	1.00421	0.0114475
0000001010101010	1.06879	1.03549	1.05214	0.0166491
0000001010101011	1.09879	1.0628	1.0808	0.0179942
0000001010101100	1.01661	0.978283	0.997445	0.019162
0000001010101101	1.0257	1.02044	1.02307	0.00262975
0000001010101110	0.956864	1.05889	1.00788	0.0510152
0000001010101111	1.07714	0.92125	0.999193	0.0779424
0000001010110000	1.07016	0.989409	1.02978	0.0403759
0000001010110001	0.985502	1.11092	1.04821	0.0627093
0000001010110010	1.01821	1.04146	1.02984	0.0116238
0000001010110011	1.13328	0.917638	1.02546	0.107822
0000001010110100	1.04121	1.00897	1.02509	0.0161195
0000001010110101	1.06498	1.02244	1.04371	0.0212704
0000001010110110	1.0638	1.02741	1.0456	0.018192
0000001010110111	1.05577	1.07249	1.06413	0.00836194
0000001010111000	0.985683	1.12879	1.05724	0.0715547
0000001010111001	1.09242	1.00532	1.04887	0.0435488
0000001010111010	1.10121	0.907852	1.00453	0.0966808
0000001010111011	1.05928	1.04018	1.04973	0.00954759
0000001010111100	1.01207	0.98206	0.997063	0.0150037
0000001010111101	1.06983	1.09611	1.08297	0.0131389
0000001010111110	1.00433	1.09536	1.04984	0.0455108
0000001010111111	1.06425	1.06077	1.06251	0.00174116
0000001011000000	1.07463	0.984552	1.02959	0.0450396
0000001011000001	1.05497	0.953258	1.00412	0.0508579
0000001011000010	1.06314	1.06318	1.06316	2.15153e-05
0000001011000011	0.941388	0.896733	0.919061	0.0223274
0000001011000100	0.933047	0.971053	0.95205	0.0190028
0000001011000101	0.974582	0.975482	0.975032	0.000449978
0000001011000110	1.03172	1.03289	1.03231	0.000586075
0000001011000111	1.01561	1.06832	1.04197	0.0263542
0000001011001000	0.973915	1.03745	1.00568	0.031767
0000001011001001	1.09602	1.04293	1.06947	0.026543
0000001011001010	0.986781	1.01736	1.00207	0.0152905
0000001011001011	1.04954	0.991321	1.02043	0.029109
0000001011001100	1.03251	0.922311	0.977408	0.0550978
0000001011001101	1.03907	0.982134	1.0106	0.0284664
0000001011001110	1.01233	1.05641	1.03437	0.022042
0000001011001111	1.00533	1.0042	1.00476	0.000565868
0000001011010000	1.0944	1.0505	1.07245	0.0219488
0000001011010001	1.05769	0.978721	1.0182	0.0394835
0000001011010010	1.01192	1.03115	1.02153	0.00961427
0000001011010011	1.0541	1.07138	1.06274	0.00863821
0000001011010100	1.01155	1.05195	1.03175	0.0202025
0000001011010101	1.00164	1.07365	1.03764	0.0360074
0000001011010110	1.04367	1.01641	1.03004	0.0136338
0000001011010111	0.956509	1.07726	1.01688	0.0603753
0000001011011000	1.09902	1.00024	1.04963	0.0493875
0000001011011001	1.07224	1.06485	1.06854	0.0036971
0000001011011010	1.02094	1.0899	1.05542	0.0344784
0000001011011011	1.0932	1.04247	1.06784	0.025366
0000001011011100	1.06605	1.00131	1.03368	0.032369
0000001011011101	1.0339	1.041	1.03745	0.00354912
0000001011011110	1.05719	1.04814	1.05266	0.00452715
0000001011011111	1.09086	1.10171	1.09629	0.00542776
0000001011100000	0.99578	1.00155	0.998664	0.00288319
0000001011100001	1.09119	1.02703	1.05911	0.0320796
0000001011100010	0.942532	1.01545	0.978989	0.0364566
0000001011100011	1.00618	1.06804	1.03711	0.0309275
0000001011100100	0.991257	0.990455	0.990856	0.000400891
0000001011100101	0.959194	1.02034	0.989769	0.030575
0000001011100110	1.03696	1.06902	1.05299	0.0160298
0000001011100111	1.06916	1.01276	1.04096	0.0282003
0000001011101000	0.983314	1.07205	1.02768	0.0443697
0000001011101001	1.08518	0.993193	1.03919	0.0459951
0000001011101010	1.08544	1.07952	1.08248	0.00295851
0000001011101011	1.06523	1.02128	1.04325	0.0219741
0000001011101100	0.976006	0.972473	0.97424	0.00176618
0000001011101101	1.03119	1.01268	1.02193	0.00925515
0000001011101110	1.01398	1.02479	1.01938	0.00540833
0000001011101111	1.0724	1.07343	1.07292	0.000511909
0000001011110000	0.981952	1.0697	1.02583	0.0438739
0000001011110001	1.04133	1.06775	1.05454	0.0132071
0000001011110010	1.0195	0.975922	0.997709	0.021787
0000001011110011	1.04389	1.04713	1.04551	0.00161553
0000001011110100	0.95199	1.08909	1.02054	0.0685487
0000001011110101	1.06595	1.08381	1.07488	0.00892751
0000001011110110	1.02016	1.00002	1.01009	0.0100689
0000001011110111	1.06273	1.08957	1.07615	0.0134198
0000001011111000	1.04329	1.08372	1.06351	0.0202168
0000001011111001	1.07542	1.05602	1.06572	0.0096993
0000001011111010	1.06063	1.0091	1.03487	0.0257647
0000001011111011	1.01579	0.875661	0.945724	0.070063
0000001011111100	1.01489	1.06803	1.04146	0.0265687
0000001011111101	1.01079	1.05168	1.03124	0.0204458
0000001011111110	1.03197	1.06565	1.04881	0.0168411
0000001011111111	1.04821	1.05147	1.04984	0.00162698
0000001100000000	0.903337	0.922126	0.912732	0.00939464
0000001100000001	1.10022	0.950929	1.02557	0.0746444
0000001100000010	1.00794	1.02293	1.01543	0.00749201
0000001100000011	0.885391	0.839542	0.862467	0.0229242
0000001100000100	1.02574	1.05739	1.04156	0.0158269
0000001100000101	1.05615	1.04191	1.04903	0.00712118
0000001100000110	0.989077	1.00899	0.999034	0.00995737
0000001100000111	1.02396	1.09004	1.057	0.0330393
0000001100001000	1.00916	1.03379	1.02148	0.0123155
0000001100001001	0.981307	1.00118	0.991244	0.00993627
0000001100001010	0.987588	1.05479	1.02119	0.0336023
0000001100001011	1.11914	1.04965	1.0844	0.0347424
0000001100001100	1.0181	0.970583	0.994342	0.023759
0000001100001101	1.0711	1.02206	1.04658	0.0245195
0000001100001110	1.0213	1.00179	1.01155	0.00975578
0000001100001111	1.02817	1.03936	1.03377	0.00559535
0000001100010000	1.01855	1.03038	1.02447	0.00591348
0000001100010001	0.951364	1.0863	1.01883	0.0674674
0000001100010010	1.05524	1.0672	1.06122	0.00598312
0000001100010011	1.01609	1.08207	1.04908	0.0329892
0000001100010100	0.933862	1.06527	0.999564	0.0657026
0000001100010101	1.05472	1.02732	1.04102	0.0136994
0000001100010110	1.00222	1.02829	1.01526	0.0130368
0000001100010111	1.06814	1.11037	1.08925	0.0211161
0000001100011000	1.04879	1.0643	1.05655	0.00775677
0000001100011001	1.0724	1.01777	1.04508	0.0273178
0000001100011010	1.04569	1.09663	1.07116	0.0254694
0000001100011011	1.04284	1.07791	1.06038	0.0175378
0000001100011100	1.01777	1.06821	1.04299	0.025217
0000001100011101	1.07877	1.01268	1.04573	0.033046
0000001100011110	1.05528	1.07289	1.06409	0.0088043
0000001100011111	1.0686	1.05938	1.06399	0.00461076
0000001100100000	1.06406	0.950782	1.00742	0.0566374
0000001100100001	1.03909	1.00697	1.02303	0.0160577
0000001100100010	1.02158	1.01242	1.017	0.00458285
0000001100100011	1.06086	1.05747	1.05917	0.00169436
0000001100100100	0.989482	1.05195	1.02072	0.0312345
0000001100100101	0.98619	1.03262	1.00941	0.0232163
0000001100100110	0.99916	1.05531	1.02723	0.0280744
0000001100100111	1.02379	0.994501	1.00914	0.0146438
0000001100101000	1.03806	1.00715	1.0226	0.0154541
0000001100101001	1.00398	0.995558	0.999769	0.00421062
0000001100101010	1.0545	0.948134	1.00132	0.0531822
0000001100101011	1.03275	1.0789	1.05582	0.0230779
0000001100101100	0.963441	1.05876	1.0111	0.0476575
0000001100101101	1.01999	1.1043	1.06215	0.0421504
0000001100101110	0.965286	1.01597	0.990628	0.0253421
0000001100101111	1.06503	0.967101	1.01607	0.0489655
0000001100110000	0.966007	1.01273	0.989367	0.0233605
0000001100110001	1.02621	1.02988	1.02805	0.00183621
0000001100110010	1.04067	1.04189	1.04128	0.000609229
0000001100110011	1.04659	1.07767	1.06213	0.0155369
0000001100110100	1.01969	0.981063	1.00038	0.0193157
0000001100110101	1.07507	0.99922	1.03715	0.0379258
0000001100110110	0.976621	0.929308	0.952965	0.0236564
0000001100110111	1.05055	1.07568	1.06311	0.0125644
0000001100111000	0.999663	1.0276	1.01363	0.0139702
0000001100111001	1.05233	0.971727	1.01203	0.0402997
0000001100111010	0.993843	1.04641	1.02013	0.0262854
0000001100111011	1.0247	1.08184	1.05327	0.02857
0000001100111100	1.03344	1.01126	1.02235	0.01109
0000001100111101	1.04819	0.99758	1.02289	0.0253061
0000001100111110	0.884892	0.917312	0.901102	0.0162101
0000001100111111	1.0919	1.02425	1.05808	0.0338221
0000001101000000	0.977206	1.03741	1.00731	0.0301038
0000001101000001	0.97299	0.954433	0.963712	0.00927853
0000001101000010	0.949131	1.0169	0.983015	0.0338846
0000001101000011	0.981919	1.071	1.02646	0.0445421
0000001101000100	1.02147	1.01305	1.01726	0.0042091
0000001101000101	1.01135	1.01343	1.01239	0.00103777
0000001101000110	1.04201	1.01839	1.0302	0.0118111
0000001101000111	1.06725	1.04533	1.05629	0.0109604
0000001101001000	0.995528	0.967871	0.981699	0.0138281
0000001101001001	0.93922	1.059	0.999111	0.0598908
0000001101001010	1.00044	1.08263	1.04153	0.0410935
0000001101001011	1.06573	1.05312	1.05943	0.00630715
0000001101001100	1.02079	0.995515	1.00815	0.012639
0000001101001101	1.0543	1.04005	1.04717	0.00712341
0000001101001110	0.991067	0.996898	0.993982	0.00291559
0000001101001111	1.02914	1.07362	1.05138	0.0222373
0000001101010000	1.00388	1.01813	1.011	0.00712631
0000001101010001	1.05262	1.05145	1.05203	0.000585558
0000001101010010	1.07937	1.06146	1.07042	0.00895395
0000001101010011	1.03036	1.07621	1.05329	0.0229259
0000001101010100	0.978836	1.0175	0.998171	0.0193342
0000001101010101	0.953147	1.03953	0.996336	0.0431892
0000001101010110	1.0759	1.05783	1.06687	0.009037
0000001101010111	1.05317	1.07702	1.0651	0.0119236
0000001101011000	1.00597	1.04959	1.02778	0.0218083
0000001101011001	0.952542	1.0356	0.994073	0.0415308
0000001101011010	1.02891	1.04483	1.03687	0.00796252
0000001101011011	1.05168	1.06998	1.06083	0.00915271
0000001101011100	1.03901	0.984972	1.01199	0.0270215
0000001101011101	1.01077	1.11335	1.06206	0.0512884
0000001101011110	0.832495	0.870045	0.85127	0.0187751
0000001101011111	1.07172	1.09762	1.08467	0.0129511
0000001101100000	0.964003	0.99385	0.978927	0.0149234
0000001101100001	0.983682	1.02107	1.00238	0.018696
0000001101100010	1.0138	0.995916	1.00486	0.00894335
0000001101100011	1.04631	1.06011	1.05321	0.0069002
0000001101100100	1.01743	0.995008	1.00622	0.0112131
0000001101100101	1.00446	0.926301	0.965381	0.0390798
0000001101100110	0.988043	1.02076	1.0044	0.0163593
0000001101100111	1.09852	1.00865	1.05358	0.044931
0000001101101000	0.929449	0.93485	0.932149	0.00270076
0000001101101001	1.0314	0.969514	1.00046	0.030945
0000001101101010	0.973739	1.0392	1.00647	0.0327289
0000001101101011	1.04425	1.0399	1.04208	0.00217843
0000001101101100	0.965199	0.975304	0.970251	0.00505273
0000001101101101	1.08175	0.961606	1.02168	0.0600705
0000001101101110	0.97113	1.00566	0.988393	0.0172629
0000001101101111	0.961337	0.983758	0.972548	0.0112107
0000001101110000	1.02101	0.942849	0.98193	0.0390803
0000001101110001	0.99558	0.982915	0.989248	0.00633222
0000001101110010	0.998198	1.04029	1.01924	0.0210435
0000001101110011	1.04079	1.03041	1.0356	0.00518911
0000001101110100	1.01607	1.04751	1.03179	0.0157196
0000001101110101	0.954339	1.03117	0.992752	0.0384134
0000001101110110	0.997802	1.03806	1.01793	0.0201276
0000001101110111	0.968869	1.05297	1.01092	0.0420516
0000001101111000	0.967618	0.993454	0.980536	0.0129181
0000001101111001	1.01577	1.02096	1.01836	0.00259804
0000001101111010	1.01398	0.981276	0.99763	0.0163539
0000001101111011	1.07995	1.02055	1.05025	0.0296983
0000001101111100	1.02273	1.01805	1.02039	0.00234017
0000001101111101	0.986251	0.958782	0.972517	0.0137346
0000001101111110	1.0577	1.05936	1.05853	0.000833272
0000001101111111	1.09437	1.08448	1.08943	0.00494838
0000001110000000	1.02334	1.05806	1.0407	0.0173586
0000001110000001	1.1167	1.02052	1.06861	0.0480895
0000001110000010	1.0662	1.07545	1.07082	0.00462627
0000001110000011	1.0403	0.972777	1.00654	0.0337606
0000001110000100	1.07219	0.995437	1.03381	0.038376
0000001110000101	1.0062	1.01388	1.01004	0.0038391
0000001110000110	1.05297	0.992366	1.02267	0.0303029
0000001110000111	1.03246	1.07289	1.05267	0.0202174
0000001110001000	1.04975	1.02249	1.03612	0.0136289
0000001110001001	1.03171	1.03689	1.0343	0.00258597
0000001110001010	1.06224	1.00574	1.03399	0.0282511
0000001110001011	1.03894	1.0631	1.05102	0.0120776
0000001110001100	0.999522	0.972791	0.986157	0.0133656
0000001110001101	1.08493	1.08872	1.08683	0.00189567
0000001110001110	0.940795	0.98417	0.962482	0.0216877
0000001110001111	1.04272	1.04437	1.04355	0.000827502
0000001110010000	1.05371	1.14001	1.09686	0.043151
0000001110010001	1.0594	1.11655	1.08798	0.0285758
0000001110010010	0.978551	0.969806	0.974178	0.00437253
0000001110010011	1.00769	1.09104	1.04937	0.0416779
0000001110010100	0.974697	1.07356	1.02413	0.0494317
0000001110010101	1.00302	0.962134	0.982578	0.0204444
0000001110010110	1.08801	1.09074	1.08937	0.00136685
0000001110010111	1.05483	1.04546	1.05015	0.00468386
0000001110011000	1.06293	1.01761	1.04027	0.0226634
0000001110011001	1.11575	1.07022	1.09299	0.0227614
0000001110011010	1.12501	1.02078	1.0729	0.0521195
0000001110011011	0.994562	1.1138	1.05418	0.0596216
0000001110011100	1.11142	1.09843	1.10492	0.00649865
0000001110011101	1.03251	1.04297	1.03774	0.00522785
0000001110011110	1.08185	1.08727	1.08456	0.00271062
0000001110011111	1.0801	1.01613	1.04811	0.0319843
0000001110100000	0.969596	0.956969	0.963282	0.0063138
0000001110100001	0.965336	0.935613	0.950475	0.0148613
0000001110100010	1.04846	1.0233	1.03588	0.0125814
0000001110100011	1.01618	0.978584	0.997381	0.0187973
0000001110100100	1.00813	0.931025	0.969578	0.038553
0000001110100101	1.05088	1.08444	1.06766	0.0167788
0000001110100110	1.04507	1.08753	1.0663	0.0212268
0000001110100111	1.00248	1.00625	1.00436	0.00188553
0000001110101000	1.0332	1.03929	1.03625	0.00304486
0000001110101001	1.04074	1.03663	1.03869	0.00205467
0000001110101010	1.06594	1.03932	1.05263	0.0133061
0000001110101011	1.09615	1.06253	1.07934	0.0168099
0000001110101100	0.962219	1.00018	0.9812	0.0189816
0000001110101101	0.979275	1.04738	1.01333	0.0340534
0000001110101110	1.10872	0.979484	1.0441	0.0646183
0000001110101111	1.03767	1.04827	1.04297	0.00530171
0000001110110000	1.0258	1.04785	1.03682	0.0110216
0000001110110001	1.00522	1.06983	1.03753	0.0323063
0000001110110010	1.05788	1.07056	1.06422	0.00633945
0000001110110011	0.909513	1.04358	0.976545	0.0670317
0000001110110100	1.01161	1.0493	1.03046	0.0188475
0000001110110101	1.0337	1.02277	1.02823	0.00546445
0000001110110110	1.01202	1.03824	1.02513	0.0131089
0000001110110111	0.984012	1.06611	1.02506	0.0410487
0000001110111000	0.990426	1.12377	1.0571	0.0666702
0000001110111001	1.02898	1.03286	1.03092	0.00194059
0000001110111010	1.04611	1.016	1.03105	0.0150542
0000001110111011	1.03015	1.04766	1.03891	0.00875355
0000001110111100	1.1173	1.00348	1.06039	0.0569065
0000001110111101	1.00471	1.06859	1.03665	0.0319376
0000001110111110	0.998309	1.0497	1.024	0.0256938
0000001110111111	1.05474	1.03234	1.04354	0.0111983
0000001111000000	1.0248	1.05804	1.04142	0.0166186
0000001111000001	0.998854	1.08518	1.04202	0.043164
0000001111000010	0.953029	0.99553	0.974279	0.0212503
0000001111000011	0.96132	1.08356	1.02244	0.0611212
0000001111000100	1.01977	1.0027	1.01123	0.00853445
0000001111000101	1.02212	1.05612	1.03912	0.0170003
0000001111000110	1.011	0.979188	0.995094	0.0159064
0000001111000111	0.933855	1.02574	0.979795	0.0459405
0000001111001000	0.948758	1.07071	1.00973	0.0609735
0000001111001001	1.04052	0.971597	1.00606	0.034462
0000001111001010	0.91212	0.947392	0.929756	0.0176362
0000001111001011	1.02994	1.00302	1.01648	0.0134595
0000001111001100	0.935342	1.02078	0.97806	0.0427177
0000001111001101	1.03727	1.07568	1.05648	0.0192035
0000001111001110	1.01865	1.05603	1.03734	0.018692
0000001111001111	0.95701	1.03627	0.996639	0.0396299
0000001111010000	1.02926	1.10089	1.06507	0.0358172
0000001111010001	1.05144	1.00947	1.03046	0.0209846
0000001111010010	1.06444	1.0268	1.04562	0.0188218
0000001111010011	1.02415	1.04081	1.03248	0.00833382
0000001111010100	1.08016	0.944968	1.01257	0.0675987
0000001111010101	0.97865	1.05877	1.01871	0.0400597
0000001111010110	0.922164	1.00668	0.964424	0.04226
0000001111010111	1.05702	1.05872	1.05787	0.000851497
0000001111011000	1.05628	1.0207	1.03849	0.0177878
0000001111011001	0.998955	0.994129	0.996542	0.0024128
0000001111011010	1.00269	1.04475	1.02372	0.0210328
0000001111011011	0.985682	1.02114	1.00341	0.0177303
0000001111011100	1.07401	1.04299	1.0585	0.0155073
0000001111011101	1.02141	1.13135	1.07638	0.0549739
0000001111011110	0.989913	1.03762	1.01376	0.023851
0000001111011111	1.01725	1.07041	1.04383	0.0265834
0000001111100000	1.04485	0.985591	1.01522	0.0296303
0000001111100001	0.989773	0.965853	0.977813	0.01196
0000001111100010	0.982214	1.02196	1.00209	0.0198714
0000001111100011	1.07314	1.06216	1.06765	0.005489
0000001111100100	1.0309	1.01939	1.02514	0.00575527
0000001111100101	1.03247	1.05604	1.04426	0.0117878
0000001111100110	1.03618	0.989535	1.01286	0.0233203
0000001111100111	1.01084	1.03346	1.02215	0.0113087
0000001111101000	0.959472	0.932484	0.945978	0.0134941
0000001111101001	1.03212	1.01442	1.02327	0.00885067
0000001111101010	1.00272	0.99907	1.0009	0.00182733
0000001111101011	0.937402	1.0574	0.9974	0.0599981
0000001111101100	0.998665	1.02362	1.01114	0.0124785
0000001111101101	0.925365	1.0282	0.976783	0.0514178
0000001111101110	1.05848	1.02327	1.04088	0.0176056
0000001111101111	0.991523	1.06216	1.02684	0.035321
0000001111110000	1.02336	1.02937	1.02636	0.00300916
0000001111110001	1.07542	1.05506	1.06524	0.0101772
0000001111110010	0.989963	1.0191	1.00453	0.0145689
0000001111110011	1.0559	1.08889	1.0724	0.0164942
0000001111110100	1.02767	1.04457	1.03612	0.00845151
0000001111110101	1.03869	1.08751	1.0631	0.0244114
0000001111110110	1.03377	0.970049	1.00191	0.031862
0000001111110111	0.998589	0.997801	0.998195	0.000393959
0000001111111000	1.03754	1.03863	1.03809	0.000545291
0000001111111001	0.956395	1.07019	1.01329	0.0568996
0000001111111010	1.02693	1.0842	1.05557	0.0286315
0000001111111011	1.12038	1.0639	1.09214	0.0282416
0000001111111100	1.07615	0.981561	1.02885	0.0472941
0000001111111101	1.05982	1.00197	1.03089	0.0289269
0000001111111110	0.95164	1.01728	0.98446	0.0328198
0000001111111111	1.05225	1.05402	1.05313	0.000886995
0000010000000000	1.04555	0.967481	1.00651	0.0390328
0000010000000001	0.982618	0.944638	0.963628	0.0189898
0000010000000010	1.00024	0.96332	0.981781	0.0184611
0000010000000011	0.928991	0.90044	0.914716	0.0142754
0000010000000100	1.01109	0.970076	0.990584	0.0205081
0000010000000101	1.01219	0.96723	0.989712	0.0224825
0000010000000110	0.919453	0.94253	0.930992	0.0115384
0000010000000111	1.09195	1.01287	1.05241	0.0395389
0000010000001000	1.00553	0.967894	0.986711	0.0188174
0000010000001001	1.03345	1.04085	1.03715	0.00369891
0000010000001010	1.08189	0.971878	1.02688	0.055005
0000010000001011	1.00762	1.01805	1.01283	0.00521673
0000010000001100	0.986778	0.813546	0.900162	0.0866161
0000010000001101	1.01056	0.933717	0.97214	0.0384228
0000010000001110	0.993186	1.02685	1.01002	0.0168312
0000010000001111	1.07082	0.931749	1.00128	0.0695333
0000010000010000	1.03207	1.03115	1.03161	0.000459269
0000010000010001	0.994599	1.04953	1.02206	0.027464
0000010000010010	1.0302	0.973233	1.00172	0.0284836
0000010000010011	1.02605	1.05008	1.03806	0.0120154
0000010000010100	0.977157	1.07395	1.02555	0.048395
0000010000010101	1.0081	1.05013	1.02911	0.0210113
0000010000010110	1.01362	0.988122	1.00087	0.0127507
0000010000010111	0.919308	0.95819	0.938749	0.0194411
0000010000011000	1.00608	1.05666	1.03137	0.0252886
0000010000011001	1.06255	1.05841	1.06048	0.0020729
0000010000011010	1.02745	1.00726	1.01736	0.0100929
0000010000011011	1.04541	1.05598	1.0507	0.00528242
0000010000011100	0.918608	1.01257	0.965589	0.0469807
0000010000011101	1.02697	0.987215	1.00709	0.0198794
0000010000011110	0.99115	0.952151	0.971651	0.0194993
0000010000011111	0.94557	1.08019	1.01288	0.0673087
0000010000100000	0.985109	0.997473	0.991291	0.0061821
0000010000100001	0.964872	1.0088	0.986836	0.0219641
0000010000100010	1.08403	1.0537	1.06887	0.0151628
0000010000100011	1.02294	1.0048	1.01387	0.00907251
0000010000100100	0.998644	1.02834	1.01349	0.014849
0000010000100101	1.02412	0.937037	0.98058	0.0435429
0000010000100110	0.979743	0.886998	0.933371	0.0463722
0000010000100111	1.04302	1.02067	1.03185	0.0111716
0000010000101000	1.05478	0.97436	1.01457	0.0402108
0000010000101001	0.968672	0.950784	0.959728	0.00894398
0000010000101010	1.06549	0.960868	1.01318	0.0523111
0000010000101011	1.07321	1.05298	1.0631	0.0101157
0000010000101100	0.919673	0.920192	0.919933	0.000259194
0000010000101101	0.960046	0.960996	0.960521	0.000474684
0000010000101110	1.04053	0.986539	1.01354	0.026998
0000010000101111	0.983096	1.05143	1.01726	0.0341674
0000010000110000	0.943521	0.975327	0.959424	0.0159031
0000010000110001	1.02649	1.00557	1.01603	0.0104596
0000010000110010	0.997363	0.969415	0.983389	0.013974
0000010000110011	1.08689	1.01826	1.05258	0.0343127
0000010000110100	1.03992	0.995369	1.01764	0.0222749
0000010000110101	0.96033	1.01763	0.988982	0.0286519
0000010000110110	0.958579	0.984645	0.971612	0.013033
0000010000110111	1.00807	1.00172	1.00489	0.00317334
0000010000111000	1.00062	0.974534	0.987579	0.0130456
0000010000111001	0.991408	1.00953	1.00047	0.00906036
0000010000111010	1.07665	1.00858	1.04262	0.0340365
0000010000111011	0.896943	1.01569	0.956316	0.0593733
0000010000111100	0.961852	0.980656	0.971254	0.00940195
0000010000111101	1.03013	1.02234	1.02624	0.0038912
0000010000111110	1.00091	1.05735	1.02913	0.0282209
0000010000111111	1.02104	1.03133	1.02618	0.00514722
0000010001000000	0.948113	0.97312	0.960617	0.0125036
0000010001000001	0.931396	0.9769	0.954148	0.0227519
0000010001000010	1.00415	0.977867	0.99101	0.0131423
0000010001000011	1.03032	0.946804	0.988563	0.0417587
0000010001000100	0.948982	0.951868	0.950425	0.00144268
0000010001000101	1.00125	0.932706	0.966979	0.0342728
0000010001000110	1.01092	0.97228	0.991599	0.0193195
0000010001000111	1.02733	1.03083	1.02908	0.00174839
0000010001001000	0.964107	0.944658	0.954383	0.00972451
0000010001001001	0.939691	0.943612	0.941652	0.00196044
0000010001001010	0.983972	0.948169	0.966071	0.0179016
0000010001001011	0.971733	1.00894	0.990334	0.0186011
0000010001001100	0.941298	0.896119	0.918709	0.0225894
0000010001001101	0.957078	0.816967	0.887023	0.0700559
0000010001001110	0.933102	1.00002	0.966562	0.03346
0000010001001111	0.969826	1.01654	0.993182	0.0233562
0000010001010000	1.06291	0.964285	1.0136	0.0493132
0000010001010001	0.976128	1.06236	1.01925	0.0431181
0000010001010010	0.933496	1.00894	0.971219	0.0377232
0000010001010011	1.05873	0.940777	0.999755	0.0589779
0000010001010100	0.947928	1.03432	0.991125	0.0431965
0000010001010101	1.04226	1.01213	1.0272	0.0150627
0000010001010110	1.00151	1.00604	1.00377	0.0022642
0000010001010111	0.957436	1.04695	1.00219	0.0447551
0000010001011000	0.996449	1.02815	1.0123	0.0158521
0000010001011001	1.021	0.976179	0.998592	0.0224124
0000010001011010	1.06982	1.01974	1.04478	0.0250395
0000010001011011	1.06068	1.02715	1.04391	0.0167641
0000010001011100	0.94083	0.962184	0.951507	0.0106772
0000010001011101	0.982537	1.01729	0.999912	0.0173742
0000010001011110	1.02893	0.933274	0.981103	0.0478293
0000010001011111	1.06405	1.06641	1.06523	0.00117921
0000010001100000	0.95387	0.964673	0.959271	0.00540174
0000010001100001	0.935397	0.984083	0.95974	0.0243433
0000010001100010	0.961612	0.99472	0.978166	0.0165539
0000010001100011	1.01301	0.982889	0.997951	0.0150624
0000010001100100	0.922684	0.925841	0.924263	0.00157861
0000010001100101	0.922964	0.969757	0.94636	0.0233963
0000010001100110	1.03992	0.999073	1.0195	0.0204231
0000010001100111	0.920692	0.99464	0.957666	0.0369737
0000010001101000	0.906563	0.919315	0.912939	0.00637618
0000010001101001	0.915181	0.929308	0.922244	0.00706324
0000010001101010	0.934389	0.930895	0.932642	0.00174662
0000010001101011	0.960465	1.00112	0.980792	0.0203271
0000010001101100	0.94043	0.904261	0.922346	0.0180843
0000010001101101	0.922938	0.903126	0.913032	0.00990595
0000010001101110	0.943362	0.996731	0.970047	0.0266844
0000010001101111	1.03915	0.974169	1.00666	0.0324909
0000010001110000	0.936372	0.976911	0.956642	0.0202694
0000010001110001	0.973037	0.952206	0.962622	0.0104158
0000010001110010	0.966725	0.959098	0.962911	0.00381329
0000010001110011	1.06099	1.04956	1.05528	0.00571438
0000010001110100	0.990246	0.999488	0.994867	0.00462124
0000010001110101	0.977338	1.01521	0.996273	0.0189354
0000010001110110	0.981531	1.05838	1.01996	0.0384266
0000010001110111	1.06918	1.0524	1.06079	0.00839086
0000010001111000	0.942545	0.924995	0.93377	0.00877516
0000010001111001	0.987464	0.983989	0.985726	0.00173732
0000010001111010	0.979671	0.99834	0.989005	0.00933451
0000010001111011	1.04638	1.02719	1.03679	0.00959545
0000010001111100	0.982461	0.908643	0.945552	0.036909
0000010001111101	0.987098	0.99374	0.990419	0.00332083
0000010001111110	0.946262	0.952201	0.949231	0.00296918
0000010001111111	1.03598	1.02661	1.0313	0.00468463
0000010010000000	1.05111	0.999054	1.02508	0.0260294
0000010010000001	1.01011	0.989705	0.999908	0.010203
0000010010000010	1.04772	0.982012	1.01487	0.0328552
0000010010000011	1.04147	0.92885	0.98516	0.0563104
0000010010000100	1.01913	1.0571	1.03812	0.0189802
0000010010000101	0.967253	1.04104	1.00415	0.0368942
0000010010000110	0.994883	0.955889	0.975386	0.0194969
0000010010000111	0.989319	1.11565	1.05249	0.0631666
0000010010001000	1.04578	1.04086	1.04332	0.00245827
0000010010001001	1.02022	1.02423	1.02222	0.0020041
0000010010001010	0.993939	1.0233	1.00862	0.0146786
0000010010001011	1.13072	1.06768	1.0992	0.03152
0000010010001100	0.958993	1.03179	0.995392	0.0363999
0000010010001101	1.01768	0.983508	1.0006	0.0170881
0000010010001110	1.04529	1.02374	1.03452	0.0107741
0000010010001111	1.05962	1.02539	1.04251	0.0171152
0000010010010000	1.01294	1.00222	1.00758	0.00535729
0000010010010001	1.04258	1.08086	1.06172	0.0191384
0000010010010010	1.03853	1.0691	1.05381	0.0152829
0000010010010011	1.05673	1.05722	1.05698	0.000243114
0000010010010100	1.04118	1.08682	1.064	0.0228207
0000010010010101	1.04717	1.09096	1.06907	0.0218945
0000010010010110	1.08363	0.973956	1.0288	0.0548392
0000010010010111	1.04678	1.08847	1.06763	0.0208453
0000010010011000	0.983218	1.00187	0.992544	0.00932577
0000010010011001	1.02511	1.10162	1.06337	0.0382552
0000010010011010	0.915786	0.987409	0.951598	0.0358116
0000010010011011	1.09632	1.13718	1.11675	0.0204288
0000010010011100	0.995922	1.07859	1.03726	0.0413362
0000010010011101	0.970608	1.10427	1.03744	0.0668301
0000010010011110	1.06055	1.03132	1.04593	0.0146159
0000010010011111	1.0486	1.01876	1.03368	0.0149227
0000010010100000	1.00401	1.00503	1.00452	0.00051257
0000010010100001	0.985123	1.0205	1.00281	0.0176863
0000010010100010	1.05062	1.05869	1.05465	0.00403428
0000010010100011	1.06537	1.08432	1.07485	0.00947878
0000010010100100	0.981299	0.930743	0.956021	0.0252781
0000010010100101	1.0199	1.04123	1.03056	0.0106659
0000010010100110	1.02803	0.943696	0.985865	0.0421689
0000010010100111	0.939632	1.0327	0.986166	0.0465344
0000010010101000	0.954776	1.01472	0.984748	0.0299717
0000010010101001	1.00394	0.970491	0.987217	0.016726
0000010010101010	1.06257	1.01084	1.0367	0.025868
0000010010101011	1.09532	0.98706	1.04119	0.0541303
0000010010101100	1.08161	1.01644	1.04902	0.0325846
0000010010101101	1.05047	1.04254	1.0465	0.00396733
0000010010101110	0.977114	1.01318	0.995145	0.0180311
0000010010101111	1.01355	1.05926	1.0364	0.0228589
0000010010110000	1.02342	1.02949	1.02645	0.00303931
0000010010110001	1.05301	1.09934	1.07617	0.0231639
0000010010110010	1.01576	1.06731	1.04153	0.0257746
0000010010110011	0.991368	0.936257	0.963812	0.0275553
0000010010110100	1.06629	1.00832	1.0373	0.0289842
0000010010110101	1.10242	1.06878	1.0856	0.0168208
0000010010110110	1.07423	0.967454	1.02084	0.0533901
0000010010110111	1.13682	0.933121	1.03497	0.101847
0000010010111000	1.07198	0.951102	1.01154	0.0604382
0000010010111001	0.978407	1.03199	1.0052	0.0267909
0000010010111010	1.13802	1.00927	1.07365	0.0643756
0000010010111011	1.05802	1.01096	1.03449	0.0235305
0000010010111100	1.02985	0.968548	0.999198	0.0306499
0000010010111101	0.941963	1.07878	1.01037	0.0684077
0000010010111110	1.08135	1.03206	1.0567	0.024643
0000010010111111	1.0742	0.960047	1.01712	0.0570749
0000010011000000	1.00616	0.999989	1.00307	0.00308405
0000010011000001	0.97204	0.989734	0.980887	0.00884714
0000010011000010	0.914308	0.97277	0.943539	0.0292306
0000010011000011	1.07453	0.976767	1.02565	0.0488815
0000010011000100	0.986093	0.9961	0.991097	0.00500339
0000010011000101	0.995411	1.01146	1.00344	0.00802667
0000010011000110	1.00398	0.999464	1.00172	0.00225573
0000010011000111	0.938406	1.09184	1.01512	0.076719
0000010011001000	0.955619	0.968614	0.962116	0.00649779
0000010011001001	1.03937	1.00823	1.0238	0.0155707
0000010011001010	1.00579	1.01086	1.00832	0.00253222
0000010011001011	0.974659	1.06288	1.01877	0.0441087
0000010011001100	1.00957	0.961754	0.98566	0.0239058
0000010011001101	0.951981	0.991494	0.971737	0.0197564
0000010011001110	1.05053	1.00041	1.02547	0.0250596
0000010011001111	1.07534	1.05525	1.06529	0.0100415
0000010011010000	0.992854	1.02109	1.00697	0.0141164
0000010011010001	0.994057	1.11198	1.05302	0.0589627
0000010011010010	0.969477	1.01102	0.990248	0.0207702
0000010011010011	0.987204	0.950378	0.968791	0.0184133
0000010011010100	0.994661	0.988267	0.991464	0.00319702
0000010011010101	1.05087	0.967024	1.00895	0.0419214
0000010011010110	1.10749	1.03948	1.07348	0.034006
0000010011010111	1.05278	1.02107	1.03692	0.0158546
0000010011011000	0.992036	0.927373	0.959705	0.0323311
0000010011011001	1.04703	0.965751	1.00639	0.0406392
0000010011011010	1.01358	0.9684	0.990989	0.0225895
0000010011011011	0.971131	1.00118	0.986157	0.0150264
0000010011011100	0.974223	1.00618	0.9902	0.0159773
0000010011011101	1.04537	1.05531	1.05034	0.00496928
0000010011011110	0.968143	1.03771	1.00293	0.0347836
0000010011011111	1.07705	0.984983	1.03102	0.0460341
0000010011100000	0.988612	0.977304	0.982958	0.00565388
0000010011100001	0.987292	0.903982	0.945637	0.0416551
0000010011100010	0.988973	1.02676	1.00787	0.0188929
0000010011100011	1.00004	1.05885	1.02945	0.0294041
0000010011100100	0.943716	0.98015	0.961933	0.018217
0000010011100101	0.972745	0.834628	0.903687	0.0690583
0000010011100110	0.992715	1.01479	1.00375	0.011036
0000010011100111	1.0571	1.03125	1.04417	0.0129254
0000010011101000	0.955843	0.925915	0.940879	0.0149643
0000010011101001	1.02552	0.950306	0.987911	0.0376049
0000010011101010	1.00231	1.00076	1.00154	0.00077376
0000010011101011	1.06331	1.01837	1.04084	0.0224691
0000010011101100	0.951941	0.932349	0.942145	0.00979605
0000010011101101	0.888275	0.938234	0.913255	0.0249795
0000010011101110	0.981725	0.969442	0.975583	0.00614156
0000010011101111	0.984876	0.970688	0.977782	0.00709426
0000010011110000	1.05051	0.991611	1.02106	0.029448
0000010011110001	1.02926	1.04825	1.03876	0.00949852
0000010011110010	0.982539	1.03338	1.00796	0.0254214
0000010011110011	0.890737	1.00416	0.947447	0.0567104
0000010011110100	1.05747	1.00126	1.02937	0.0281034
0000010011110101	0.960123	1.06945	1.01478	0.0546613
0000010011110110	1.07944	1.06904	1.07424	0.00519983
0000010011110111	0.904388	1.00319	0.953788	0.0493999
0000010011111000	1.02922	1.03741	1.03332	0.00409847
0000010011111001	0.947577	1.06486	1.00622	0.0586416
0000010011111010	1.01529	1.02954	1.02241	0.00712131
0000010011111011	0.933526	1.11004	1.02178	0.0882566
0000010011111100	0.960248	1.0168	0.988524	0.0282759
0000010011111101	1.00741	1.0186	1.013	0.00559406
0000010011111110	1.02713	1.01983	1.02348	0.00365023
0000010011111111	0.934165	0.961711	0.947938	0.013773
0000010100000000	1.03801	1.01213	1.02507	0.0129375
0000010100000001	1.02297	1.02344	1.0232	0.00023422
0000010100000010	0.997101	0.986981	0.992041	0.00506003
0000010100000011	0.977427	1.01958	0.998504	0.0210767
0000010100000100	0.991611	0.996213	0.993912	0.0023009
0000010100000101	1.04533	0.96929	1.00731	0.0380181
0000010100000110	1.02914	1.00029	1.01472	0.0144269
0000010100000111	0.951354	1.07661	1.01398	0.0626283
0000010100001000	1.00912	1.00934	1.00923	0.000107795
0000010100001001	0.916023	1.02243	0.969225	0.0532016
0000010100001010	0.999942	1.02722	1.01358	0.0136368
0000010100001011	1.09895	1.09286	1.0959	0.00304584
0000010100001100	1.06106	1.02566	1.04336	0.017701
0000010100001101	0.918516	0.795944	0.85723	0.061286
0000010100001110	0.999086	0.937763	0.968424	0.0306611
0000010100001111	1.07075	1.02405	1.0474	0.0233547
0000010100010000	1.00115	1.07074	1.03595	0.0347937
0000010100010001	1.04703	1.06794	1.05749	0.0104574
0000010100010010	1.07361	1.01041	1.04201	0.0316038
0000010100010011	0.96604	1.07417	1.0201	0.054063
0000010100010100	1.02062	1.05683	1.03873	0.0181064
0000010100010101	1.0183	1.03094	1.02462	0.00631703
0000010100010110	1.06074	1.01579	1.03826	0.0224761
0000010100010111	1.04485	1.04826	1.04655	0.00170288
0000010100011000	1.02922	1.03265	1.03093	0.00171414
0000010100011001	1.00955	0.988438	0.998994	0.010557
0000010100011010	0.97735	1.02075	0.99905	0.0216998
0000010100011011	1.03836	0.968883	1.00362	0.0347374
0000010100011100	1.01324	1.01955	1.0164	0.00315462
0000010100011101	1.04784	1.00192	1.02488	0.0229598
0000010100011110	1.00047	0.982908	0.991689	0.0087815
0000010100011111	1.07314	1.05939	1.06626	0.00687351
0000010100100000	0.968001	0.899176	0.933589	0.0344129
0000010100100001	0.987798	0.939469	0.963633	0.0241647
0000010100100010	1.03588	0.960937	0.998407	0.0374698
0000010100100011	1.04659	0.99357	1.02008	0.0265078
0000010100100100	0.932263	0.980198	0.95623	0.0239673
0000010100100101	0.944456	0.973828	0.959142	0.0146861
0000010100100110	0.990717	0.978357	0.984537	0.00617989
0000010100100111	0.917304	0.936231	0.926767	0.00946349
0000010100101000	0.820291	0.972948	0.89662	0.0763282
0000010100101001	1.00471	0.923878	0.964297	0.0404181
0000010100101010	1.03447	1.00227	1.01837	0.0161019
0000010100101011	0.962176	1.03406	0.99812	0.0359439
0000010100101100	0.959005	0.952765	0.955885	0.00311993
0000010100101101	0.929607	1.01209	0.970848	0.0412408
0000010100101110	0.96273	1.0172	0.989963	0.0272336
0000010100101111	1.05188	0.886705	0.969292	0.0825875
0000010100110000	0.985847	0.95127	0.968559	0.0172884
0000010100110001	1.0057	1.0506	1.02815	0.0224484
0000010100110010	1.0344	1.02041	1.02741	0.00699025
0000010100110011	1.04865	0.978529	1.01359	0.0350616
0000010100110100	1.05211	0.932837	0.992476	0.0596384
0000010100110101	1.04658	1.01572	1.03115	0.0154313
0000010100110110	1.06377	1.02879	1.04628	0.0174937
0000010100110111	1.0047	1.05171	1.0282	0.023506
0000010100111000	1.03096	0.999453	1.01521	0.0157516
0000010100111001	1.03831	1.02557	1.03194	0.00636599
0000010100111010	1.06701	0.947583	1.0073	0.0597159
0000010100111011	1.01771	0.904828	0.961271	0.0564431
0000010100111100	0.987758	0.98513	0.986444	0.00131406
0000010100111101	1.00214	0.967969	0.985052	0.0170836
0000010100111110	1.04997	0.969329	1.00965	0.0403227
0000010100111111	1.04784	1.02794	1.03789	0.00994863
0000010101000000	0.970626	0.928829	0.949727	0.0208987
0000010101000001	1.00365	0.914774	0.959213	0.044439
0000010101000010	0.979043	0.991592	0.985317	0.00627488
0000010101000011	1.0673	1.04786	1.05758	0.00971705
0000010101000100	0.93155	0.938642	0.935096	0.00354609
0000010101000101	0.979297	0.908678	0.943987	0.0353094
0000010101000110	0.953546	0.99509	0.974318	0.0207721
0000010101000111	0.995213	0.991194	0.993204	0.00200972
0000010101001000	0.961175	0.935985	0.94858	0.0125951
0000010101001001	1.00465	0.987016	0.995831	0.00881501
0000010101001010	1.03471	0.994533	1.01462	0.0200882
0000010101001011	0.956099	1.03541	0.995752	0.0396538
0000010101001100	0.966224	0.933369	0.949796	0.0164276
0000010101001101	0.97378	0.950396	0.962088	0.0116921
0000010101001110	0.976246	0.988701	0.982473	0.00622761
0000010101001111	1.0471	1.02496	1.03603	0.0110694
0000010101010000	0.972499	0.961918	0.967209	0.00529057
0000010101010001	1.05515	1.04601	1.05058	0.00456661
0000010101010010	0.994414	1.02407	1.00924	0.0148258
0000010101010011	1.04703	1.0352	1.04111	0.00591185
0000010101010100	1.02959	1.00547	1.01753	0.0120586
0000010101010101	1.06144	0.916804	0.989121	0.0723163
0000010101010110	1.03906	1.02502	1.03204	0.00702069
0000010101010111	1.00595	1.00406	1.00501	0.000946891
0000010101011000	1.02268	1.00082	1.01175	0.0109311
0000010101011001	1.00974	1.06226	1.036	0.0262587
0000010101011010	1.04025	1.05539	1.04782	0.00756982
0000010101011011	1.0351	0.978675	1.00689	0.028213
0000010101011100	0.99682	0.990976	0.993898	0.00292174
0000010101011101	1.09468	0.997886	1.04628	0.0483962
0000010101011110	0.943942	1.00846	0.976203	0.0322612
0000010101011111	0.975687	1.00444	0.990062	0.0143755
0000010101100000	0.966119	0.934912	0.950516	0.0156032
0000010101100001	0.899993	0.978532	0.939263	0.0392693
0000010101100010	0.991009	0.934478	0.962743	0.0282654
0000010101100011	0.942337	0.941918	0.942127	0.000209674
0000010101100100	0.974385	0.902125	0.938255	0.0361299
0000010101100101	1.01088	0.962154	0.986518	0.0243636
0000010101100110	0.944696	0.906922	0.925809	0.018887
0000010101100111	0.995015	1.01159	1.0033	0.00828752
0000010101101000	0.98403	0.933429	0.958729	0.0253003
0000010101101001	0.906295	0.910463	0.908379	0.00208376
0000010101101010	0.936942	0.946516	0.941729	0.00478719
0000010101101011	0.914074	0.95055	0.932312	0.0182384
0000010101101100	0.968613	0.853251	0.910932	0.0576809
0000010101101101	0.965452	0.947786	0.956619	0.00883258
0000010101101110	0.946354	0.857786	0.90207	0.0442838
0000010101101111	1.04986	0.979787	1.01482	0.035034
0000010101110000	0.964421	0.944119	0.95427	0.0101506
0000010101110001	1.03416	0.981313	1.00773	0.0264219
0000010101110010	1.0154	0.977621	0.996513	0.0188913
0000010101110011	0.947959	0.969914	0.958936	0.0109775
0000010101110100	1.01483	1.00616	1.01049	0.004338
0000010101110101	0.993602	0.96497	0.979286	0.0143162
0000010101110110	1.01373	0.970172	0.991952	0.0217799
0000010101110111	1.11385	1.0512	1.08253	0.031326
0000010101111000	0.954417	0.873963	0.91419	0.0402272
0000010101111001	0.952801	0.923188	0.937995	0.0148064
0000010101111010	1.0251	1.03738	1.03124	0.00614217
0000010101111011	0.951233	1.01127	0.981251	0.0300173
0000010101111100	1.02131	0.967383	0.994346	0.026963
0000010101111101	1.02625	0.985995	1.00612	0.0201253
0000010101111110	0.925316	0.902214	0.913765	0.0115514
0000010101111111	0.952333	0.93153	0.941931	0.0104012
0000010110000000	1.03651	1.05579	1.04615	0.00963907
0000010110000001	0.980807	0.962982	0.971894	0.00891228
0000010110000010	1.02027	1.01604	1.01816	0.00211577
0000010110000011	1.05619	1.006	1.03109	0.0250925
0000010110000100	1.01342	1.02224	1.01783	0.00440777
0000010110000101	0.994707	1.00791	1.00131	0.00659988
0000010110000110	0.975566	1.0006	0.988083	0.0125174
0000010110000111	0.992799	1.0121	1.00245	0.00965264
0000010110001000	1.03963	0.992363	1.01599	0.0236323
0000010110001001	1.03624	1.02252	1.02938	0.00685939
0000010110001010	0.988538	1.01838	1.00346	0.0149186
0000010110001011	1.02503	0.961777	0.993402	0.0316257
0000010110001100	1.03986	0.980976	1.01042	0.0294436
0000010110001101	1.0092	0.911026	0.960111	0.0490854
0000010110001110	1.01009	1.02519	1.01764	0.00755097
0000010110001111	1.03231	0.976463	1.00439	0.0279256
0000010110010000	1.04696	1.06275	1.05485	0.00789335
0000010110010001	0.98837	0.995561	0.991965	0.00359529
0000010110010010	0.946525	1.03965	0.993086	0.0465615
0000010110010011	1.0166	1.07429	1.04544	0.0288461
0000010110010100	1.0288	1.04124	1.03502	0.00622095
0000010110010101	1.03162	1.05919	1.04541	0.013789
0000010110010110	1.07426	1.01024	1.04225	0.0320105
0000010110010111	1.08421	1.05104	1.06763	0.0165892
0000010110011000	1.01155	1.03859	1.02507	0.01352
0000010110011001	1.01861	1.02284	1.02072	0.00211534
0000010110011010	0.953261	1.02764	0.990449	0.0371881
0000010110011011	1.04213	1.00023	1.02118	0.0209488
0000010110011100	1.02766	1.02389	1.02577	0.00188048
0000010110011101	1.00889	1.02418	1.01653	0.00764266
0000010110011110	1.00733	1.0205	1.01392	0.00658285
0000010110011111	1.08646	0.982302	1.03438	0.0520767
0000010110100000	0.972163	0.971374	0.971769	0.000394525
0000010110100001	0.960213	0.919157	0.939685	0.0205281
0000010110100010	0.984038	0.986092	0.985065	0.00102675
0000010110100011	1.04373	1.01179	1.02776	0.0159713
0000010110100100	0.951069	0.968087	0.959578	0.00850905
0000010110100101	0.980394	0.994526	0.98746	0.00706588
0000010110100110	0.979572	0.96489	0.972231	0.00734087
0000010110100111	0.997885	1.02725	1.01257	0.0146812
0000010110101000	0.94408	0.947722	0.945901	0.00182115
0000010110101001	0.99703	0.976542	0.986786	0.0102444
0000010110101010	0.980684	0.955824	0.968254	0.0124303
0000010110101011	0.993488	1.01008	1.00179	0.00829808
0000010110101100	0.959453	0.92474	0.942096	0.0173566
0000010110101101	1.0126	0.957876	0.985236	0.02736
0000010110101110	0.962399	1.00068	0.981541	0.0191419
0000010110101111	1.00159	1.02854	1.01507	0.0134797
0000010110110000	0.948449	0.987286	0.967868	0.0194186
0000010110110001	1.01637	0.927241	0.971808	0.0445671
0000010110110010	1.0301	0.978392	1.00424	0.0258522
0000010110110011	1.08164	1.07461	1.07812	0.00351481
0000010110110100	0.94042	0.990242	0.965331	0.024911
0000010110110101	1.01086	1.04453	1.02769	0.0168336
0000010110110110	1.0063	1.02685	1.01658	0.0102763
0000010110110111	1.04483	1.02937	1.0371	0.00772854
0000010110111000	1.02499	1.00307	1.01403	0.0109597
0000010110111001	0.929356	1.03831	0.983833	0.0544769
0000010110111010	1.03787	1.0356	1.03674	0.0011308
0000010110111011	0.962359	0.938463	0.950411	0.011948
0000010110111100	0.999549	0.999674	0.999612	6.23679e-05
0000010110111101	0.976206	1.00856	0.992382	0.0161752
0000010110111110	1.01746	0.953674	0.985567	0.0318933
0000010110111111	0.995228	0.935603	0.965415	0.0298128
0000010111000000	0.91695	0.958196	0.937573	0.0206234
0000010111000001	0.966954	0.98345	0.975202	0.00824822
0000010111000010	0.982265	0.966556	0.97441	0.00785425
0000010111000011	1.00398	1.08949	1.04673	0.0427556
0000010111000100	1.04982	0.98437	1.01709	0.0327227
0000010111000101	0.96056	0.977219	0.96889	0.00832952
0000010111000110	1.04961	0.955393	1.0025	0.0471094
0000010111000111	1.02304	1.04613	1.03459	0.0115447
0000010111001000	0.94116	0.984411	0.962785	0.0216257
0000010111001001	1.00455	0.989712	0.997133	0.00742143
0000010111001010	0.992729	1.00103	0.996877	0.0041481
0000010111001011	1.107	1.03056	1.06878	0.0382193
0000010111001100	1.02767	0.965003	0.996335	0.0313322
0000010111001101	0.946214	1.01289	0.979551	0.0333364
0000010111001110	1.03982	0.978161	1.00899	0.0308316
0000010111001111	0.947234	1.0317	0.989469	0.0422354
0000010111010000	0.964866	0.995504	0.980185	0.0153192
0000010111010001	0.993274	1.03806	1.01567	0.0223952
0000010111010010	0.958644	1.0181	0.988373	0.0297291
0000010111010011	1.04024	0.998699	1.01947	0.0207729
0000010111010100	1.09187	1.00355	1.04771	0.0441643
0000010111010101	1.08778	1.02295	1.05537	0.0324121
0000010111010110	0.987972	0.960631	0.974301	0.0136704
0000010111010111	1.0316	1.01825	1.02493	0.00667651
0000010111011000	0.907599	0.916953	0.912276	0.00467744
0000010111011001	0.883383	0.858952	0.871168	0.0122155
0000010111011010	0.967653	0.926344	0.946999	0.0206549
0000010111011011	1.12731	1.06828	1.0978	0.0295149
0000010111011100	1.03167	0.972436	1.00205	0.0296153
0000010111011101	1.00714	1.01744	1.01229	0.00515021
0000010111011110	0.986947	0.961697	0.974322	0.0126251
0000010111011111	0.919619	0.995522	0.95757	0.0379516
0000010111100000	0.950945	0.961108	0.956027	0.00508113
0000010111100001	1.01024	1.01425	1.01224	0.00200754
0000010111100010	0.962843	0.95595	0.959397	0.00344639
0000010111100011	0.991759	0.976214	0.983987	0.00777223
0000010111100100	0.963663	0.928074	0.945869	0.0177946
0000010111100101	1.01201	0.984905	0.998456	0.0135515
0000010111100110	0.955058	1.01685	0.985954	0.0308957
0000010111100111	0.932008	1.05811	0.995057	0.0630489
0000010111101000	0.967279	0.962245	0.964762	0.00251675
0000010111101001	0.960131	0.899699	0.929915	0.0302161
0000010111101010	1.01866	0.948873	0.983766	0.034893
0000010111101011	0.95173	0.973416	0.962573	0.0108429
0000010111101100	0.916287	0.920949	0.918618	0.00233142
0000010111101101	0.945561	1.00807	0.976817	0.0312567
0000010111101110	1.01169	1.00827	1.00998	0.00170857
0000010111101111	0.995993	1.00638	1.00119	0.00519392
0000010111110000	1.02136	0.95286	0.987112	0.034252
0000010111110001	0.955186	0.955786	0.955486	0.000300075
0000010111110010	1.02311	0.87575	0.949432	0.0736821
0000010111110011	1.06928	1.01819	1.04374	0.0255457
0000010111110100	0.990001	0.928171	0.959086	0.0309146
0000010111110101	0.982654	0.981763	0.982209	0.000445436
0000010111110110	1.01513	1.02426	1.01969	0.00456343
0000010111110111	0.958196	1.01082	0.984508	0.0263129
0000010111111000	0.998548	0.920994	0.959771	0.0387773
0000010111111001	0.984587	0.93285	0.958718	0.0258687
0000010111111010	0.940903	0.995952	0.968428	0.0275247
0000010111111011	1.05648	1.04089	1.04868	0.007792
0000010111111100	1.04057	0.826395	0.933482	0.107087
0000010111111101	1.00076	0.887941	0.944348	0.0564075
0000010111111110	0.941794	0.983394	0.962594	0.0208
0000010111111111	1.01445	0.87007	0.94226	0.0721896
0000011000000000	1.05656	0.988772	1.02267	0.0338933
0000011000000001	0.96453	1.07741	1.02097	0.0564411
0000011000000010	1.04656	1.04813	1.04734	0.000786051
0000011000000011	1.07906	1.08881	1.08394	0.00487303
0000011000000100	0.972638	1.04657	1.0096	0.0369637
0000011000000101	1.01531	0.916505	0.965908	0.0494031
0000011000000110	1.01935	0.96488	0.992114	0.0272337
0000011000000111	1.08203	1.04433	1.06318	0.018851
0000011000001000	1.05852	1.05725	1.05789	0.000638077
0000011000001001	1.04716	1.09867	1.07292	0.0257555
0000011000001010	1.06383	0.994876	1.02935	0.0344771
0000011000001011	1.03071	1.03926	1.03498	0.00427503
0000011000001100	1.03135	1.01954	1.02545	0.00590554
0000011000001101	1.07145	1.03922	1.05533	0.0161179
0000011000001110	1.08988	1.0334	1.06164	0.0282434
0000011000001111	1.02013	1.0661	1.04311	0.022988
0000011000010000	0.93773	1.08902	1.01337	0.0756428
0000011000010001	1.0846	1.08555	1.08507	0.000476036
0000011000010010	1.05136	0.990723	1.02104	0.0303208
0000011000010011	1.06529	1.04476	1.05503	0.0102619
0000011000010100	1.09098	1.05315	1.07206	0.0189155
0000011000010101	1.04266	1.07289	1.05778	0.0151131
0000011000010110	0.988909	1.03917	1.01404	0.0251301
0000011000010111	1.04153	0.993547	1.01754	0.0239912
0000011000011000	1.04761	1.06009	1.05385	0.00623911
0000011000011001	1.00426	1.0815	1.04288	0.0386241
0000011000011010	1.02864	1.04267	1.03566	0.0070137
0000011000011011	1.08955	1.10674	1.09814	0.00859437
0000011000011100	1.04637	1.03979	1.04308	0.00329249
0000011000011101	1.05342	1.04032	1.04687	0.00655141
0000011000011110	1.05234	1.04109	1.04672	0.00562565
0000011000011111	1.11765	0.98899	1.05332	0.0643276
0000011000100000	1.03051	1.0079	1.01921	0.0113022
0000011000100001	0.991519	1.02089	1.0062	0.0146856
0000011000100010	1.02906	1.07058	1.04982	0.0207593
0000011000100011	0.905089	1.04601	0.975551	0.0704624
0000011000100100	1.03147	0.889073	0.960271	0.0711974
0000011000100101	0.963092	1.07936	1.02123	0.0581364
0000011000100110	1.0856	1.02433	1.05497	0.0306317
0000011000100111	0.979462	1.06594	1.0227	0.0432403
0000011000101000	1.02972	1.04257	1.03615	0.00642256
0000011000101001	1.07665	1.08863	1.08264	0.00598719
0000011000101010	0.961268	1.08418	1.02272	0.0614552
0000011000101011	1.01557	1.03252	1.02405	0.0084753
0000011000101100	1.10632	1.0505	1.07841	0.0279106
0000011000101101	1.08258	1.08338	1.08298	0.00040193
0000011000101110	1.13121	1.0238	1.0775	0.0537047
0000011000101111	1.0185	1.07371	1.04611	0.027603
0000011000110000	1.08235	1.02999	1.05617	0.0261831
0000011000110001	1.07365	1.05092	1.06229	0.0113638
0000011000110010	1.01606	1.06569	1.04087	0.0248149
0000011000110011	1.07795	1.05142	1.06468	0.0132643
0000011000110100	0.932631	1.02968	0.981156	0.0485247
0000011000110101	1.02226	1.07745	1.04985	0.0275963
0000011000110110	1.0864	1.00141	1.0439	0.0424969
0000011000110111	1.07907	1.05537	1.06722	0.0118484
0000011000111000	0.979533	1.05435	1.01694	0.0374087
0000011000111001	1.09104	0.984135	1.03758	0.0534505
0000011000111010	0.970823	1.09227	1.03155	0.0607233
0000011000111011	1.03204	1.10009	1.06607	0.0340261
0000011000111100	1.0155	1.01585	1.01567	0.00017441
0000011000111101	0.972312	1.0318	1.00206	0.0297459
0000011000111110	1.01745	1.01433	1.01589	0.00156065
0000011000111111	1.06387	0.996123	1.02999	0.0338714
0000011001000000	0.987774	0.986859	0.987317	0.000457525
0000011001000001	0.955667	0.957259	0.956463	0.00079578
0000011001000010	1.00881	1.02641	1.01761	0.00880325
0000011001000011	1.03234	1.01531	1.02383	0.00851277
0000011001000100	0.971261	0.92751	0.949386	0.0218756
0000011001000101	0.991705	1.02846	1.01008	0.0183795
0000011001000110	0.98252	1.01387	0.998194	0.0156744
0000011001000111	1.03469	1.04791	1.0413	0.00660929
0000011001001000	0.89392	0.963521	0.928721	0.0348006
0000011001001001	1.03807	0.942508	0.99029	0.0477819
0000011001001010	1.04332	1.00734	1.02533	0.0179908
0000011001001011	1.01162	1.05377	1.0327	0.0210756
0000011001001100	0.923355	0.99794	0.960647	0.0372926
0000011001001101	0.991824	1.03255	1.01219	0.020362
0000011001001110	1.00966	1.02047	1.01506	0.00540378
0000011001001111	1.03369	1.01852	1.02611	0.00758191
0000011001010000	0.969019	0.987511	0.978265	0.00924585
0000011001010001	1.0267	1.06667	1.04669	0.0199874
0000011001010010	1.06382	1.09312	1.07847	0.0146535
0000011001010011	1.00314	1.07019	1.03666	0.0335239
0000011001010100	1.03368	1.04157	1.03763	0.00394195
0000011001010101	1.02379	0.970966	0.997379	0.0264128
0000011001010110	1.09811	0.97565	1.03688	0.0612305
0000011001010111	1.10914	1.09926	1.1042	0.00493587
0000011001011000	0.934575	0.860553	0.897564	0.0370108
0000011001011001	1.00364	0.987256	0.995449	0.0081934
0000011001011010	1.00184	1.03928	1.02056	0.018721
0000011001011011	1.02196	1.11551	1.06874	0.0467747
0000011001011100	1.02816	1.03363	1.0309	0.00273566
0000011001011101	1.0553	1.02115	1.03822	0.0170721
0000011001011110	1.00698	1.04849	1.02774	0.0207584
0000011001011111	1.04879	1.08305	1.06592	0.0171311
0000011001100000	0.970139	0.964885	0.967512	0.00262725
0000011001100001	0.985031	0.991004	0.988017	0.00298652
0000011001100010	1.01043	1.03556	1.023	0.0125623
0000011001100011	1.02255	0.98894	1.00574	0.0168035
0000011001100100	0.995432	0.985361	0.990397	0.00503523
0000011001100101	1.02841	0.997954	1.01318	0.0152297
0000011001100110	0.99794	0.985553	0.991746	0.00619347
0000011001100111	0.915818	1.03608	0.97595	0.0601315
0000011001101000	0.972363	0.946035	0.959199	0.013164
0000011001101001	0.99711	1.02998	1.01355	0.0164358
0000011001101010	0.993042	0.992031	0.992536	0.000505422
0000011001101011	1.01821	1.09403	1.05612	0.0379138
0000011001101100	0.922741	0.845211	0.883976	0.0387651
0000011001101101	1.02415	1.0582	1.04117	0.0170269
0000011001101110	1.00798	1.04872	1.02835	0.0203705
0000011001101111	1.02526	1.05584	1.04055	0.0152932
0000011001110000	1.0197	0.974292	0.996995	0.0227028
0000011001110001	0.987749	0.998298	0.993024	0.00527455
0000011001110010	1.01503	1.03327	1.02415	0.00911998
0000011001110011	1.00492	1.04781	1.02637	0.0214482
0000011001110100	0.948672	1.02428	0.986474	0.0378017
0000011001110101	1.02271	0.908414	0.96556	0.0571468
0000011001110110	0.931906	0.894983	0.913444	0.0184615
0000011001110111	1.0416	1.00556	1.02358	0.0180216
0000011001111000	1.07991	1.00154	1.04073	0.0391842
0000011001111001	0.998225	0.975097	0.986661	0.0115639
0000011001111010	0.928104	1.03412	0.981113	0.0530089
0000011001111011	0.978787	1.01103	0.994908	0.0161216
0000011001111100	0.975029	1.04164	1.00833	0.0333055
0000011001111101	1.04039	1.0086	1.0245	0.0158993
0000011001111110	1.04001	1.03475	1.03738	0.00262851
0000011001111111	1.00758	1.08547	1.04652	0.0389438
0000011010000000	1.04405	1.08016	1.06211	0.0180548
0000011010000001	1.04488	0.971701	1.00829	0.0365897
0000011010000010	0.975937	0.993008	0.984472	0.0085356
0000011010000011	1.07485	1.08952	1.08219	0.00733727
0000011010000100	1.06488	1.12981	1.09734	0.0324672
0000011010000101	1.05608	1.00904	1.03256	0.0235183
0000011010000110	1.03834	1.05403	1.04619	0.00784231
0000011010000111	1.1201	1.03873	1.07942	0.0406862
0000011010001000	1.06224	1.04871	1.05548	0.00676594
0000011010001001	1.02779	1.01962	1.0237	0.00408272
0000011010001010	1.04672	1.06522	1.05597	0.00924852
0000011010001011	1.06343	1.01236	1.03789	0.0255393
0000011010001100	0.991121	1.10105	1.04609	0.0549641
0000011010001101	1.03857	1.03078	1.03467	0.00389673
0000011010001110	1.03303	1.01782	1.02543	0.007604
0000011010001111	1.00139	0.968847	0.985119	0.0162723
0000011010010000	1.00994	1.10804	1.05899	0.0490512
0000011010010001	1.09711	1.07489	1.086	0.0111095
0000011010010010	1.01304	1.0387	1.02587	0.0128296
0000011010010011	1.03034	0.990554	1.01044	0.0198912
0000011010010100	1.06131	1.00809	1.0347	0.0266118
0000011010010101	1.0587	1.10477	1.08174	0.0230306
0000011010010110	1.00721	1.0242	1.01571	0.00849656
0000011010010111	0.989943	1.07084	1.03039	0.0404464
0000011010011000	1.02971	1.11647	1.07309	0.0433787
0000011010011001	1.12602	1.10734	1.11668	0.00933762
0000011010011010	1.04596	1.10755	1.07675	0.0307931
0000011010011011	1.01753	1.00884	1.01318	0.00434599
0000011010011100	1.06223	1.0508	1.05652	0.00571342
0000011010011101	1.07377	0.985909	1.02984	0.043931
0000011010011110	0.989057	1.0147	1.00188	0.0128239
0000011010011111	1.08813	1.06041	1.07427	0.0138584
0000011010100000	1.07464	1.03937	1.057	0.017636
0000011010100001	1.04161	1.00294	1.02227	0.0193358
0000011010100010	1.01206	1.06805	1.04005	0.0279965
0000011010100011	1.06566	0.98471	1.02518	0.0404729
0000011010100100	1.03166	0.987945	1.0098	0.0218562
0000011010100101	1.08108	1.0495	1.06529	0.0157913
0000011010100110	1.03995	1.05296	1.04645	0.0065092
0000011010100111	1.0914	1.07967	1.08553	0.00586527
0000011010101000	1.02775	1.01264	1.0202	0.00755927
0000011010101001	1.05219	1.08523	1.06871	0.0165221
0000011010101010	1.12009	1.00986	1.06497	0.0551119
0000011010101011	0.955937	1.01147	0.983702	0.0277649
0000011010101100	1.06134	1.03084	1.04609	0.015251
0000011010101101	0.980403	1.11633	1.04837	0.0679644
0000011010101110	1.07887	0.987295	1.03308	0.0457879
0000011010101111	1.0516	1.10878	1.08019	0.0285914
0000011010110000	1.03068	1.02649	1.02859	0.00209479
0000011010110001	1.04473	1.05959	1.05216	0.00743178
0000011010110010	1.05234	1.02576	1.03905	0.0132907
0000011010110011	1.00081	1.07369	1.03725	0.0364405
0000011010110100	1.05695	1.07434	1.06564	0.00869586
0000011010110101	0.983089	1.08881	1.03595	0.0528583
0000011010110110	1.04803	1.04542	1.04673	0.00130536
0000011010110111	1.02115	1.06602	1.04359	0.0224309
0000011010111000	1.05526	1.00283	1.02905	0.0262146
0000011010111001	1.07394	1.04915	1.06154	0.0123995
0000011010111010	0.968627	0.96862	0.968623	3.55468e-06
0000011010111011	1.00259	1.00785	1.00522	0.00263362
0000011010111100	0.980554	0.880885	0.93072	0.0498342
0000011010111101	1.06328	0.867655	0.965469	0.0978144
0000011010111110	0.981529	1.00972	0.995626	0.0140967
0000011010111111	1.12987	1.10672	1.11829	0.011571
0000011011000000	0.960163	1.04031	1.00024	0.0400746
0000011011000001	1.01083	0.953543	0.982186	0.0286431
0000011011000010	1.02097	1.02294	1.02196	0.000983436
0000011011000011	1.11634	1.04285	1.0796	0.0367454
0000011011000100	1.02272	1.01989	1.0213	0.00141692
0000011011000101	1.03959	1.03727	1.03843	0.00116003
0000011011000110	1.07871	0.982759	1.03073	0.0479738
0000011011000111	1.123	1.0429	1.08295	0.040046
0000011011001000	0.95295	0.943057	0.948003	0.00494698
0000011011001001	1.01065	1.04015	1.0254	0.01475
0000011011001010	1.00459	1.01818	1.01138	0.0067917
0000011011001011	1.01443	1.05319	1.03381	0.0193827
0000011011001100	1.00635	1.01435	1.01035	0.00400253
0000011011001101	1.02923	1.03182	1.03052	0.00129282
0000011011001110	1.04378	0.981919	1.01285	0.0309289
0000011011001111	1.00306	1.01453	1.00879	0.00573482
0000011011010000	1.07169	1.10088	1.08629	0.0145934
0000011011010001	1.07434	0.91051	0.992425	0.0819157
0000011011010010	1.02708	1.06214	1.04461	0.0175336
0000011011010011	1.09049	1.01295	1.05172	0.038772
0000011011010100	1.01564	1.09138	1.05351	0.0378743
0000011011010101	1.00907	1.13041	1.06974	0.0606677
0000011011010110	0.973289	1.03747	1.00538	0.0320901
0000011011010111	1.04612	1.07237	1.05924	0.0131234
0000011011011000	1.0787	1.03693	1.05782	0.020884
0000011011011001	1.04642	1.09586	1.07114	0.0247191
0000011011011010	1.07306	1.06677	1.06991	0.00314491
0000011011011011	1.08486	1.05749	1.07118	0.0136851
0000011011011100	1.07061	1.10688	1.08874	0.0181363
0000011011011101	1.0118	1.05573	1.03376	0.0219618
0000011011011110	1.06242	1.07802	1.07022	0.00779812
0000011011011111	1.09425	1.07023	1.08224	0.0120083
0000011011100000	1.02551	0.931618	0.978564	0.0469462
0000011011100001	0.953241	1.04312	0.998179	0.0449375
0000011011100010	1.04431	1.03931	1.04181	0.0024999
0000011011100011	1.05207	1.11394	1.08301	0.0309386
0000011011100100	1.07507	1.0087	1.04188	0.0331864
0000011011100101	1.06915	1.05679	1.06297	0.00618069
0000011011100110	1.00856	1.06222	1.03539	0.0268285
0000011011100111	1.02011	1.04075	1.03043	0.01032
0000011011101000	1.08499	1.01895	1.05197	0.0330188
0000011011101001	0.927622	1.0486	0.988112	0.0604908
0000011011101010	1.03111	1.01644	1.02378	0.00733828
0000011011101011	0.962353	1.0921	1.02723	0.0648728
0000011011101100	0.986133	1.006	0.996068	0.00993497
0000011011101101	1.00352	0.994043	0.99878	0.00473783
0000011011101110	0.964232	1.06	1.01212	0.0478845
0000011011101111	1.03387	1.03162	1.03274	0.00112383
0000011011110000	1.02423	1.11924	1.07174	0.0475062
0000011011110001	0.997813	0.994301	0.996057	0.00175617
0000011011110010	1.03624	0.949628	0.992936	0.0433079
0000011011110011	1.00924	1.00123	1.00524	0.0040072
0000011011110100	1.06064	1.07351	1.06708	0.00643605
0000011011110101	1.06929	1.08668	1.07799	0.00869359
0000011011110110	1.00705	1.03563	1.02134	0.0142893
0000011011110111	0.999073	1.06957	1.03432	0.0352462
0000011011111000	1.06042	1.07204	1.06623	0.00580831
0000011011111001	1.01876	1.02705	1.02291	0.00414292
0000011011111010	1.06381	1.04136	1.05259	0.0112245
0000011011111011	0.975263	0.874235	0.924749	0.0505138
0000011011111100	0.992466	1.04322	1.01784	0.0253771
0000011011111101	1.0255	1.03667	1.03109	0.00558479
0000011011111110	1.0091	1.0748	1.04195	0.0328477
0000011011111111	0.843525	0.924383	0.883954	0.0404293
0000011100000000	1.0374	1.03668	1.03704	0.000357329
0000011100000001	1.06441	0.888084	0.976247	0.0881626
0000011100000010	1.05213	0.977302	1.01472	0.0374143
0000011100000011	1.07489	1.0903	1.0826	0.00770931
0000011100000100	1.0384	0.87069	0.954543	0.083853
0000011100000101	1.06265	0.999439	1.03105	0.0316074
0000011100000110	1.03628	0.884252	0.960267	0.0760149
0000011100000111	1.01826	1.06483	1.04155	0.0232846
0000011100001000	0.953262	1.02187	0.987564	0.034302
0000011100001001	0.988921	1.05616	1.02254	0.0336193
0000011100001010	1.06415	1.01226	1.03821	0.0259427
0000011100001011	1.08733	1.11238	1.09985	0.0125254
0000011100001100	1.03874	1.00378	1.02126	0.0174807
0000011100001101	1.08775	1.00774	1.04775	0.0400057
0000011100001110	0.955165	1.05255	1.00386	0.0486899
0000011100001111	1.03788	1.00224	1.02006	0.0178226
0000011100010000	1.07343	1.03531	1.05437	0.0190615
0000011100010001	1.02748	1.0488	1.03814	0.0106599
0000011100010010	1.00227	1.10339	1.05283	0.0505571
0000011100010011	1.08993	1.05826	1.0741	0.0158344
0000011100010100	1.05091	1.03939	1.04515	0.00576048
0000011100010101	1.01946	1.07818	1.04882	0.0293611
0000011100010110	1.09723	1.05217	1.0747	0.0225284
0000011100010111	1.07585	1.08803	1.08194	0.00608923
0000011100011000	0.938752	1.04837	0.993562	0.0548102
0000011100011001	1.10226	1.07339	1.08782	0.0144355
0000011100011010	1.03441	1.00222	1.01831	0.0160953
0000011100011011	1.09697	1.10322	1.1001	0.00312346
0000011100011100	0.99646	1.0939	1.04518	0.0487198
0000011100011101	1.08398	1.03715	1.06057	0.0234126
0000011100011110	1.11716	1.05949	1.08833	0.0288372
0000011100011111	0.937324	1.03676	0.987041	0.0497174
0000011100100000	0.994725	1.01938	1.00705	0.0123272
0000011100100001	0.907954	1.01441	0.961181	0.0532276
0000011100100010	0.930627	0.995769	0.963198	0.032571
0000011100100011	1.01023	1.04046	1.02535	0.0151125
0000011100100100	0.980201	0.964562	0.972382	0.00781942
0000011100100101	0.8702	1.04466	0.957429	0.0872287
0000011100100110	1.05159	1.00778	1.02969	0.0219041
0000011100100111	1.07621	1.02964	1.05292	0.0232858
0000011100101000	1.00387	0.957575	0.980721	0.0231463
0000011100101001	0.980771	1.02806	1.00442	0.0236455
0000011100101010	0.994262	1.01157	1.00292	0.00865446
0000011100101011	1.0251	1.07491	1.05	0.024903
0000011100101100	0.863156	0.819434	0.841295	0.0218612
0000011100101101	1.02712	1.00866	1.01789	0.00923127
0000011100101110	0.954488	1.01272	0.983606	0.0291182
0000011100101111	1.09703	1.01995	1.05849	0.0385435
0000011100110000	1.04398	1.02972	1.03685	0.0071302
0000011100110001	0.959227	1.06723	1.01323	0.0540019
0000011100110010	0.877914	0.865893	0.871904	0.00601034
0000011100110011	1.02284	0.983396	1.00312	0.0197219
0000011100110100	0.981766	0.974924	0.978345	0.00342101
0000011100110101	1.06912	1.10592	1.08752	0.0183975
0000011100110110	0.974987	1.00728	0.991134	0.016147
0000011100110111	0.999444	1.02819	1.01382	0.0143754
0000011100111000	1.02362	1.0166	1.02011	0.00351116
0000011100111001	1.07333	1.02955	1.05144	0.0218907
0000011100111010	1.00309	1.07486	1.03897	0.0358839
0000011100111011	1.03591	1.06205	1.04898	0.0130692
0000011100111100	0.992174	1.03372	1.01295	0.020773
0000011100111101	1.0046	1.01894	1.01177	0.00716869
0000011100111110	1.06801	1.02443	1.04622	0.0217903
0000011100111111	0.95132	1.04378	0.997552	0.0462325
0000011101000000	1.00168	0.999151	1.00041	0.00126284
0000011101000001	1.0193	1.03949	1.02939	0.010096
0000011101000010	1.03726	1.06203	1.04964	0.012387
0000011101000011	0.985978	1.01362	0.999798	0.0138196
0000011101000100	1.01869	1.01661	1.01765	0.00104167
0000011101000101	1.01195	0.953055	0.982503	0.0294482
0000011101000110	1.05197	0.994347	1.02316	0.0288126
0000011101000111	1.02208	1.0324	1.02724	0.0051586
0000011101001000	1.04418	1.05914	1.05166	0.00747881
0000011101001001	0.996617	1.02604	1.01133	0.01471
0000011101001010	1.0118	0.944609	0.978207	0.0335976
0000011101001011	0.910369	1.02557	0.967971	0.0576017
0000011101001100	0.969736	1.0087	0.989219	0.0194824
0000011101001101	1.07221	1.03592	1.05406	0.018145
0000011101001110	1.04743	1.00669	1.02706	0.0203706
0000011101001111	1.10056	1.06654	1.08355	0.0170108
0000011101010000	0.975833	0.984289	0.980061	0.00422774
0000011101010001	1.05137	0.93732	0.994343	0.057023
0000011101010010	1.07372	1.04543	1.05958	0.0141419
0000011101010011	0.991009	1.00814	0.999577	0.00856756
0000011101010100	1.06645	0.959415	1.01293	0.0535162
0000011101010101	0.978795	1.07243	1.02561	0.0468167
0000011101010110	1.03688	1.04928	1.04308	0.00620234
0000011101010111	1.0283	1.04759	1.03794	0.00964555
0000011101011000	1.04698	0.97766	1.01232	0.0346585
0000011101011001	1.02485	0.878547	0.951699	0.073152
0000011101011010	1.00184	1.08062	1.04123	0.0393904
0000011101011011	1.06945	1.11142	1.09044	0.0209849
0000011101011100	1.01738	1.04264	1.03001	0.012631
0000011101011101	1.09027	0.98789	1.03908	0.0511915
0000011101011110	1.03546	1.09296	1.06421	0.0287476
0000011101011111	1.03072	0.933244	0.981982	0.0487382
0000011101100000	0.965031	0.992619	0.978825	0.0137942
0000011101100001	1.01802	1.00703	1.01252	0.00549325
0000011101100010	1.04167	1.01627	1.02897	0.0126994
0000011101100011	0.971788	1.03448	1.00313	0.0313461
0000011101100100	1.02667	0.980451	1.00356	0.0231082
0000011101100101	1.00279	0.946285	0.974538	0.028252
0000011101100110	1.06156	1.00003	1.03079	0.0307633
0000011101100111	1.06328	0.983974	1.02363	0.0396527
0000011101101000	0.930371	0.950692	0.940531	0.0101605
0000011101101001	0.943921	1.02143	0.982677	0.0387562
0000011101101010	1.00379	1.03233	1.01806	0.014267
0000011101101011	1.02788	1.03655	1.03221	0.00433471
0000011101101100	0.988204	1.0142	1.0012	0.012999
0000011101101101	0.930876	0.929579	0.930227	0.000648443
0000011101101110	1.01676	0.989998	1.00338	0.0133824
0000011101101111	1.00329	0.980674	0.991984	0.0113092
0000011101110000	0.994365	1.01399	1.00418	0.00981479
0000011101110001	1.06753	1.01698	1.04225	0.0252777
0000011101110010	1.0134	1.02069	1.01705	0.00364773
0000011101110011	1.03477	1.09933	1.06705	0.0322774
0000011101110100	0.961912	1.00068	0.981298	0.0193856
0000011101110101	1.05625	1.03374	1.04499	0.0112588
0000011101110110	0.935532	1.0718	1.00366	0.0681317
0000011101110111	0.990347	1.06926	1.0298	0.0394571
0000011101111000	0.964201	0.949323	0.956762	0.00743941
0000011101111001	0.947726	0.930883	0.939304	0.0084217
0000011101111010	1.0161	1.03149	1.02379	0.00769545
0000011101111011	1.08274	1.07333	1.07803	0.00470504
0000011101111100	0.953549	0.998932	0.97624	0.022691
0000011101111101	0.964811	0.995979	0.980395	0.015584
0000011101111110	1.0537	0.983816	1.01876	0.0349404
0000011101111111	0.976796	1.05176	1.01428	0.0374827
0000011110000000	1.02056	1.01174	1.01615	0.00441252
0000011110000001	0.976226	1.10134	1.03878	0.0625572
0000011110000010	0.950067	1.04206	0.996065	0.0459981
0000011110000011	1.08781	1.07107	1.07944	0.00837115
0000011110000100	1.03729	0.970945	1.00412	0.0331712
0000011110000101	1.02367	1.04422	1.03395	0.0102779
0000011110000110	1.01669	1.03011	1.0234	0.00670888
0000011110000111	1.0197	1.05327	1.03649	0.0167837
0000011110001000	0.989435	1.04721	1.01832	0.0288888
0000011110001001	1.0808	1.05964	1.07022	0.0105782
0000011110001010	1.03626	1.08636	1.06131	0.0250501
0000011110001011	1.03672	1.08843	1.06257	0.0258577
0000011110001100	1.0715	1.03073	1.05112	0.0203845
0000011110001101	0.982531	1.01851	1.00052	0.0179906
0000011110001110	1.02903	1.04425	1.03664	0.00761097
0000011110001111	1.06022	1.02397	1.04209	0.0181242
0000011110010000	0.923895	1.10339	1.01364	0.0897487
0000011110010001	0.979039	1.04121	1.01012	0.0310836
0000011110010010	1.07731	1.03884	1.05808	0.0192335
0000011110010011	1.06545	1.02086	1.04316	0.0222923
0000011110010100	1.01977	1.10659	1.06318	0.0434078
0000011110010101	1.0446	0.972907	1.00875	0.0358462
0000011110010110	1.04342	1.03996	1.04169	0.00173236
0000011110010111	1.05678	1.05297	1.05487	0.00190735
0000011110011000	0.980176	0.975392	0.977784	0.00239158
0000011110011001	1.05629	1.10545	1.08087	0.0245773
0000011110011010	0.981556	0.995657	0.988607	0.00705081
0000011110011011	0.992321	1.01186	1.00209	0.00976742
0000011110011100	1.04644	1.11883	1.08263	0.036196
0000011110011101	1.00628	1.10988	1.05808	0.0518001
0000011110011110	0.96928	1.09039	1.02983	0.0605533
0000011110011111	1.06649	1.05275	1.05962	0.00687279
0000011110100000	0.957802	0.977547	0.967674	0.0098727
0000011110100001	0.948264	1.03725	0.992758	0.0444944
0000011110100010	0.994942	1.07289	1.03391	0.0389717
0000011110100011	1.07243	1.08495	1.07869	0.00626043
0000011110100100	0.941706	1.04162	0.991666	0.0499593
0000011110100101	0.923105	1.07847	1.00079	0.0776814
0000011110100110	1.04443	1.00911	1.02677	0.0176601
0000011110100111	1.10213	1.079	1.09057	0.0115698
0000011110101000	1.03211	0.915264	0.973688	0.0584238
0000011110101001	1.10337	0.984865	1.04412	0.0592526
0000011110101010	1.00399	1.02946	1.01673	0.0127363
0000011110101011	1.08374	1.08415	1.08394	0.000201096
0000011110101100	1.05545	0.997364	1.0264	0.0290409
0000011110101101	0.950568	1.06357	1.00707	0.0564987
0000011110101110	1.03994	1.02606	1.033	0.00694155
0000011110101111	1.03021	0.968097	0.999153	0.0310556
0000011110110000	1.02772	1.01673	1.02223	0.00549487
0000011110110001	1.09627	1.05232	1.0743	0.0219739
0000011110110010	1.03795	1.03341	1.03568	0.00227133
0000011110110011	1.09279	1.02377	1.05828	0.0345136
0000011110110100	1.01765	0.992484	1.00507	0.0125813
0000011110110101	0.980741	1.04281	1.01178	0.0310367
0000011110110110	1.02812	1.02785	1.02799	0.000135218
0000011110110111	1.02324	1.1428	1.08302	0.0597801
0000011110111000	0.94984	0.933707	0.941774	0.00806627
0000011110111001	0.981608	0.880639	0.931123	0.0504844
0000011110111010	0.910284	1.04745	0.978867	0.0685828
0000011110111011	1.07089	1.01997	1.04543	0.0254615
0000011110111100	1.01108	1.02197	1.01653	0.00544414
0000011110111101	1.00017	1.02746	1.01382	0.0136435
0000011110111110	1.09812	1.04188	1.07	0.0281229
0000011110111111	1.03344	1.08897	1.0612	0.0277637
0000011111000000	1.00865	0.995143	1.0019	0.00675365
0000011111000001	1.05585	1.07152	1.06369	0.00783234
0000011111000010	0.973433	1.03962	1.00653	0.033093
0000011111000011	1.03231	1.0148	1.02355	0.00875433
0000011111000100	1.02026	1.01383	1.01705	0.00321422
0000011111000101	0.974655	0.973244	0.973949	0.000705274
0000011111000110	1.04617	0.986663	1.01642	0.0297551
0000011111000111	1.06118	1.01	1.03559	0.0255879
0000011111001000	1.0008	0.963932	0.982367	0.0184347
0000011111001001	1.02576	0.976418	1.00109	0.024671
0000011111001010	1.01774	1.06707	1.0424	0.0246628
0000011111001011	0.920869	1.09005	1.00546	0.0845902
0000011111001100	0.994709	1.03721	1.01596	0.0212489
0000011111001101	1.09696	1.0024	1.04968	0.0472806
0000011111001110	0.994807	1.0193	1.00705	0.0122455
[truncated: 63,537 more rows]
