# Supplementary material for: Hierarchical sequence-affinity landscapes shape the evolution of breadth in an anti-influenza receptor binding site antibody
Source: eLife. 2023 Jan 10;12:e83628. doi: 10.7554/eLife.83628 (PMC9995116; doi:10.7554/eLife.83628)
Supplement: Figure 1—source data 2. — Mean and standard error for -logKD and expression are reported for biological duplicates, alongside the corresponding Tite-Seq -logKD and expression measurements (as in Figure 1—source data 1). [file elife-83628-fig1-data2.xlsx]

## Sheet: Sheet1
genotype	antigen	KD_titeseq	KD_titeseq_sem	KD_isogenic	KD_isogenic_sem	Exp_titeseq	Exp_titeseq_sem	Exp_isogenic	Exp_isogenic_sem
"0000000000000000"	MA90	8.55177	0.0609477	7.73	0.02
"1111111111111111"	MA90	10.1026	0.0232715	10.06	0.05
"0000000000000000"	SI06	6	0	6	0
"1111111111111111"	SI06	9.34546	0.067193	9.315	0.105
"0000000000000000"	G189E	6	0	6	0	1.00374	0.0366937	13502.6	1681.35
"1111111111111111"	G189E	9.74896	0.146449	9.585	0.065	0.957571	0.0563392	9738.9	1426.4
"0010000000100000"	SI06	7.45184	0.0846049	6.54	0.01	0.967398	0.0140201	9203.95	1312.85
"0000001111100000"	SI06	7.90684	0.104763	7.55	0.06	1.01522	0.0296303	12619.9	1246.15
"0110010010111110"	SI06	7.71802	0.00936259	7.12	0.02	0.99961	0.00622667	9746.8	926.8
"0000001010100000"	MA90	9.02695	0.0303901	8.925	0.025	1.05831	0.00584882	21545.8	1005.85
