# Supplementary material for: Hierarchical sequence-affinity landscapes shape the evolution of breadth in an anti-influenza receptor binding site antibody
Source: eLife. 2023 Jan 10;12:e83628. doi: 10.7554/eLife.83628 (PMC9995116; doi:10.7554/eLife.83628)
Supplement: Figure 3—source data 1. — Coefficients are reported for each antigen, with standard errors, p-values, and 95% confidence intervals. [file elife-83628-fig3-data1.xlsx]

## Sheet: MA90
Params:	2517
Performance:	0.986822
Term	Coefficient	Standard Error	p-value	95% CI lower	95% CI upper
Intercept	8.53132
1	-0.01973	0.00922555	0.0324703	-0.0590929	0.019633
2	0.0937013	0.00922552	3.22802e-24	0.0543385	0.133064
3	0.704043	0.00922549	0	0.66468	0.743405
4	-0.225735	0.00922549	1.31576e-131	-0.265098	-0.186373
5	-0.0620028	0.00922563	1.82374e-11	-0.101366	-0.0226395
6	0.0276859	0.00922547	0.00269178	-0.0116767	0.0670485
7	0.274793	0.00922559	1.31833e-193	0.23543	0.314156
8	0.203712	0.00922554	1.22701e-107	0.164349	0.243075
9	0.0854668	0.00922552	2.0256e-20	0.046104	0.12483
10	0.133007	0.00922552	4.78958e-47	0.093644	0.17237
11	0.413618	0.00922563	0	0.374255	0.452982
12	-0.0447543	0.0092255	1.23043e-06	-0.084117	-0.00539153
13	0.0232436	0.00922551	0.0117549	-0.0161191	0.0626063
14	0.0131199	0.00922549	0.154993	-0.0262428	0.0524825
15	-0.151591	0.00922552	1.51814e-60	-0.190953	-0.112228
16	0.0215712	0.00922562	0.0193809	-0.017792	0.0609344
1,2	0.0241924	0.0079152	0.00224068	-0.00957959	0.0579644
1,3	-0.0259584	0.0079152	0.00104023	-0.0597304	0.00781359
1,4	-0.000238948	0.00791516	0.975917	-0.0340108	0.0335329
1,5	-0.00348901	0.00791539	0.659368	-0.0372618	0.0302838
1,6	-0.00722188	0.00791518	0.361557	-0.0409938	0.0265501
1,7	-0.00665212	0.00791539	0.400686	-0.0404249	0.0271207
1,8	-0.0113503	0.00791516	0.151579	-0.0451221	0.0224216
1,9	0.000440049	0.00791518	0.955664	-0.0333319	0.034212
1,10	0.00125372	0.00791518	0.874147	-0.0325182	0.0350256
1,11	-0.0011461	0.00791533	0.884874	-0.0349187	0.0326265
1,12	-0.00231569	0.00791522	0.769858	-0.0360878	0.0314564
1,13	-0.0059458	0.00791516	0.452541	-0.0397176	0.0278261
1,14	0.000502651	0.00791516	0.949365	-0.0332692	0.0342745
1,15	-0.00459843	0.00791514	0.561266	-0.0383702	0.0291733
1,16	-0.00107318	0.00791533	0.892152	-0.0348458	0.0326994
2,3	-0.0137595	0.00791522	0.0821526	-0.0475316	0.0200126
2,4	0.000566195	0.00791518	0.942974	-0.0332057	0.0343381
2,5	0.0131586	0.00791556	0.096444	-0.020615	0.0469321
2,6	-0.0176022	0.00791535	0.0261649	-0.0513749	0.0161704
2,7	-0.0229063	0.00791556	0.00380704	-0.0566798	0.0108673
2,8	-0.0076766	0.00791518	0.332121	-0.0414485	0.0260953
2,9	-0.0281323	0.0079152	0.000379389	-0.0619043	0.0056397
2,10	-0.02328	0.0079152	0.00327093	-0.057052	0.0104921
2,11	-0.0448039	0.00791535	1.51694e-08	-0.0785765	-0.0110312
2,12	0.00342312	0.00791539	0.665406	-0.0303497	0.0371959
2,13	-0.00168009	0.00791518	0.831904	-0.035452	0.0320918
2,14	-0.00254281	0.00791518	0.748016	-0.0363147	0.0312291
2,15	0.0109963	0.00791516	0.164756	-0.0227756	0.0447681
2,16	-0.0126672	0.00791535	0.109529	-0.0464399	0.0211054
3,4	-0.161603	0.00791537	2.38731e-92	-0.195375	-0.12783
3,5	-0.00304676	0.00791539	0.700301	-0.0368196	0.0307261
3,6	-0.0389093	0.00791522	8.86613e-07	-0.0726814	-0.00513721
3,7	0.0930723	0.00791558	6.92757e-32	0.0592986	0.126846
3,8	0.11364	0.00791518	1.13801e-46	0.0798679	0.147412
3,9	-0.0410259	0.00791518	2.18792e-07	-0.0747978	-0.00725397
3,10	-0.100655	0.00791518	5.30015e-37	-0.134427	-0.0668835
3,11	-0.0360951	0.00791537	5.12185e-06	-0.0698678	-0.00232236
3,12	0.109394	0.00791522	2.21288e-43	0.0756217	0.143166
3,13	0.0231063	0.0079152	0.00351027	-0.0106658	0.0568783
3,14	0.00134608	0.00791537	0.864964	-0.0324267	0.0351188
3,15	0.0187424	0.0079152	0.0178926	-0.0150296	0.0525144
3,16	0.0855477	0.00791554	3.34887e-27	0.0517743	0.119321
4,5	0.569756	0.00791537	0	0.535983	0.603528
4,6	0.0146419	0.00791524	0.0643424	-0.0191303	0.048414
4,7	0.00753048	0.00791556	0.34143	-0.0262431	0.041304
4,8	-0.0277104	0.00791518	0.00046399	-0.0614823	0.00606158
4,9	0.0174432	0.0079152	0.0275448	-0.0163288	0.0512152
4,10	0.0282313	0.0079152	0.00036175	-0.00554074	0.0620033
4,11	0.0494365	0.00791539	4.24826e-10	0.0156636	0.0832093
4,12	-0.0167203	0.0079152	0.0346532	-0.0504923	0.0170517
4,13	-0.00350466	0.00791522	0.65793	-0.0372768	0.0302674
4,14	0.00679108	0.00791537	0.390917	-0.0269817	0.0405638
4,15	-0.0101687	0.0079152	0.1989	-0.0439407	0.0236033
4,16	-0.00817378	0.00791554	0.301784	-0.0419472	0.0255997
5,6	0.00130161	0.00791552	0.869387	-0.0324718	0.035075
5,7	0.00919404	0.00791605	0.245466	-0.0245816	0.0429697
5,8	0.0262022	0.00791537	0.000932509	-0.00757055	0.0599749
5,9	-0.0133663	0.00791537	0.0912922	-0.047139	0.0204065
5,10	0.0165196	0.00791537	0.0368891	-0.0172531	0.0502924
5,11	0.042405	0.00791584	8.49218e-08	0.00863024	0.0761798
5,12	-0.000760984	0.00791556	0.923411	-0.0345345	0.0330126
5,13	0.00286111	0.00791535	0.717754	-0.0309116	0.0366338
5,14	0.0100258	0.00791537	0.205293	-0.0237469	0.0437986
5,15	-0.0136432	0.00791535	0.0847789	-0.0474158	0.0201295
5,16	-0.0320649	0.00791586	5.1122e-05	-0.0658398	0.00170992
6,7	-0.0144061	0.00791556	0.0687676	-0.0481797	0.0193674
6,8	-0.00158895	0.0079152	0.840898	-0.035361	0.0321831
6,9	-0.0146062	0.0079152	0.0649935	-0.0483782	0.0191658
6,10	-0.000952814	0.0079152	0.904184	-0.0347248	0.0328192
6,11	-0.00110965	0.00791539	0.888511	-0.0348825	0.0326632
6,12	-0.00697359	0.00791535	0.37831	-0.0407462	0.0267991
6,13	-0.00558346	0.00791522	0.480559	-0.0393556	0.0281886
6,14	0.000707186	0.00791524	0.928808	-0.033065	0.0344794
6,15	-0.00375846	0.00791522	0.634903	-0.0375305	0.0300136
6,16	-0.00898592	0.00791541	0.256277	-0.0427588	0.024787
7,8	-0.120725	0.00791537	1.98186e-52	-0.154498	-0.0869524
7,9	-0.0709747	0.00791537	3.1369e-19	-0.104747	-0.0372019
7,10	-0.0792656	0.00791537	1.37587e-23	-0.113038	-0.0454929
7,11	-0.222024	0.00791588	4.86309e-172	-0.255799	-0.188249
7,12	0.0493719	0.00791556	4.47942e-10	0.0155984	0.0831455
7,13	-0.00153762	0.00791539	0.845975	-0.0353104	0.0322352
7,14	0.0109916	0.00791556	0.164957	-0.022782	0.0447651
7,15	0.00900738	0.00791539	0.255142	-0.0247654	0.0427802
7,16	-0.0115736	0.00791605	0.143733	-0.0453493	0.022202
8,9	-0.03749	0.0079152	2.17955e-06	-0.0712621	-0.00371803
8,10	0.194925	0.0079152	2.80768e-133	0.161153	0.228697
8,11	0.164422	0.00791535	1.60695e-95	0.130649	0.198194
8,12	-0.0244099	0.0079152	0.00204376	-0.0581819	0.00936212
8,13	-0.002422	0.00791518	0.75961	-0.0361939	0.0313499
8,14	0.00784499	0.00791518	0.321625	-0.0259269	0.0416169
8,15	-0.00761522	0.00791516	0.336	-0.0413871	0.0261566
8,16	-0.0011686	0.00791535	0.882629	-0.0349413	0.0326041
9,10	-0.0260275	0.0079152	0.00100853	-0.0597995	0.00774453
9,11	-0.109404	0.00791535	2.17983e-43	-0.143177	-0.0756315
9,12	-0.0107091	0.0079152	0.176069	-0.0444811	0.023063
9,13	-0.00535336	0.00791518	0.498827	-0.0391253	0.0284186
9,14	-0.0099644	0.0079152	0.208073	-0.0437364	0.0238076
9,15	0.0250986	0.00791518	0.00152015	-0.00867331	0.0588706
9,16	-0.0123742	0.00791537	0.117985	-0.0461469	0.0213986
10,11	0.0676907	0.00791535	1.23823e-17	0.0339181	0.101463
10,12	0.0420115	0.0079152	1.11395e-07	0.00823945	0.0757835
10,13	-4.08575e-05	0.00791518	0.995881	-0.0338128	0.0337311
10,14	0.00417378	0.0079152	0.597979	-0.0295982	0.0379458
10,15	0.0239643	0.00791518	0.00246569	-0.00980759	0.0577363
10,16	-0.0130342	0.00791537	0.0996263	-0.0468069	0.0207386
11,12	0.0794495	0.00791535	1.08761e-23	0.0456769	0.113222
11,13	-0.00609354	0.00791537	0.4414	-0.0398663	0.0276792
11,14	0.0135746	0.00791539	0.0863574	-0.0201982	0.0473474
11,15	0.00828305	0.00791537	0.295357	-0.0254897	0.0420558
11,16	0.0275056	0.00791588	0.000511713	-0.00626938	0.0612805
12,13	0.00090378	0.00791518	0.909093	-0.0328682	0.0346757
12,14	-0.0207956	0.0079152	0.00860877	-0.0545676	0.0129765
12,15	0.000341664	0.00791518	0.96557	-0.0334303	0.0341136
12,16	0.0265092	0.00791537	0.00081128	-0.00726353	0.0602819
13,14	-0.00187736	0.00791522	0.812515	-0.0356495	0.0318947
13,15	0.0530183	0.0079152	2.12647e-11	0.0192462	0.0867903
13,16	0.00579086	0.00791539	0.464418	-0.027982	0.0395637
14,15	-0.00461314	0.0079152	0.560016	-0.0383852	0.0291589
14,16	-0.0248416	0.00791554	0.00169991	-0.0586151	0.00893188
15,16	0.12252	0.00791537	6.07635e-54	0.0887468	0.156292
1,2,3	0.0176655	0.00575339	0.00213827	-0.00688266	0.0422136
1,2,4	0.0104863	0.00575336	0.0683628	-0.0140617	0.0350343
1,2,5	0.0016116	0.00575354	0.779398	-0.0229372	0.0261604
1,2,6	0.00229609	0.00575335	0.68983	-0.0222519	0.0268441
1,2,7	0.0110774	0.00575352	0.0541937	-0.0134713	0.0356261
1,2,8	0.0110548	0.00575339	0.0546801	-0.0134933	0.035603
1,2,9	0.00444014	0.00575335	0.440266	-0.0201078	0.0289881
1,2,10	-0.0024073	0.00575335	0.675643	-0.0269553	0.0221407
1,2,11	0.000732336	0.00575335	0.898712	-0.0238156	0.0252803
1,2,12	0.0111865	0.00575348	0.0518644	-0.0133621	0.035735
1,2,13	-0.000438922	0.00575328	0.939188	-0.0249866	0.0241088
1,2,14	0.00161564	0.00575336	0.778852	-0.0229324	0.0261637
1,2,15	0.00160211	0.00575332	0.780655	-0.0229458	0.02615
1,2,16	0.00472177	0.00575343	0.411827	-0.0198265	0.0292701
1,3,4	0.017096	0.00575331	0.00296454	-0.00745181	0.0416438
1,3,5	0.0332599	0.00575344	7.4664e-09	0.00871153	0.0578083
1,3,6	0.000545284	0.00575327	0.924491	-0.0240024	0.0250929
1,3,7	0.00297184	0.00575347	0.605485	-0.0215766	0.0275203
1,3,8	0.00677264	0.00575328	0.239129	-0.0177751	0.0313203
1,3,9	0.000963233	0.00575327	0.867037	-0.0235844	0.0255109
1,3,10	-0.00131587	0.00575327	0.819089	-0.0258635	0.0232318
1,3,11	-0.00233281	0.0057533	0.685131	-0.0268806	0.0222149
1,3,12	-0.00476688	0.00575338	0.40737	-0.029315	0.0197812
1,3,13	-0.00236538	0.00575323	0.680972	-0.0269129	0.0221821
1,3,14	0.00415068	0.00575331	0.47064	-0.0203971	0.0286985
1,3,15	0.00798363	0.00575324	0.165241	-0.0165639	0.0325312
1,3,16	0.000873368	0.00575338	0.879344	-0.0236747	0.0254215
1,4,5	-0.000144304	0.00575339	0.97999	-0.0246924	0.0244038
1,4,6	0.0124553	0.00575324	0.0303974	-0.0120922	0.0370029
1,4,7	-0.00578706	0.00575341	0.314493	-0.0303353	0.0187612
1,4,8	0.0128816	0.00575328	0.0251593	-0.0116661	0.0374293
1,4,9	-0.00580983	0.00575324	0.312578	-0.0303574	0.0187377
1,4,10	0.00713273	0.00575324	0.215063	-0.0174148	0.0316803
1,4,11	0.00419197	0.00575327	0.466235	-0.0203557	0.0287396
1,4,12	0.000412818	0.00575332	0.942799	-0.024135	0.0249607
1,4,13	-5.33862e-05	0.00575321	0.992596	-0.0246008	0.024494
1,4,14	-0.00428552	0.00575331	0.456347	-0.0288333	0.0202623
1,4,15	-2.56414e-05	0.00575324	0.996444	-0.0245732	0.0245219
1,4,16	0.00358495	0.00575337	0.533219	-0.0209631	0.028133
1,5,6	-0.0136242	0.0057534	0.0178859	-0.0381724	0.010924
1,5,7	-0.00016348	0.0057536	0.977332	-0.0247125	0.0243856
1,5,8	-5.36417e-05	0.00575341	0.992561	-0.0246019	0.0244946
1,5,9	-0.00317722	0.0057534	0.580791	-0.0277254	0.021371
1,5,10	-0.00707401	0.0057534	0.218876	-0.0316222	0.0174742
1,5,11	0.00575987	0.00575343	0.316773	-0.0187884	0.0303082
1,5,12	-0.00432005	0.00575353	0.452744	-0.0288688	0.0202287
1,5,13	0.00196206	0.00575334	0.733082	-0.0225859	0.02651
1,5,14	-0.000718475	0.00575339	0.90062	-0.0252666	0.0238297
1,5,15	0.00020259	0.00575335	0.97191	-0.0243454	0.0247506
1,5,16	-0.00286635	0.00575348	0.618349	-0.0274149	0.0216822
1,6,7	0.00410121	0.0057534	0.475952	-0.020447	0.0286494
1,6,8	0.00541172	0.00575324	0.346894	-0.0191358	0.0299593
1,6,9	0.00123384	0.00575323	0.830189	-0.0233136	0.0257813
1,6,10	0.00195714	0.00575323	0.733722	-0.0225903	0.0265046
1,6,11	0.00363618	0.00575326	0.527376	-0.0209114	0.0281838
1,6,12	0.00629822	0.00575334	0.273649	-0.0182497	0.0308461
1,6,13	0.00159086	0.00575319	0.782151	-0.0229564	0.0261382
1,6,14	-0.00276885	0.00575324	0.630328	-0.0273164	0.0217787
1,6,15	0.0035685	0.00575321	0.535087	-0.0209789	0.0281159
1,6,16	0.00230374	0.00575331	0.688849	-0.0222441	0.0268515
1,7,8	0.00391898	0.00575339	0.495772	-0.0206292	0.0284671
1,7,9	-0.00229942	0.00575337	0.689405	-0.0268475	0.0222487
1,7,10	0.000898682	0.00575337	0.875875	-0.0236494	0.0254468
1,7,11	0.0042538	0.00575343	0.459697	-0.0202945	0.0288021
1,7,12	-0.00157825	0.0057535	0.783846	-0.0261269	0.0229704
1,7,13	0.00752643	0.00575334	0.190815	-0.0170215	0.0320744
1,7,14	0.000427268	0.00575341	0.940801	-0.024121	0.0249755
1,7,15	0.00185975	0.00575335	0.74651	-0.0226882	0.0264077
1,7,16	0.00842239	0.0057535	0.143234	-0.0161263	0.032971
1,8,9	-0.000441244	0.00575327	0.938867	-0.0249889	0.0241064
1,8,10	0.00244359	0.00575327	0.671034	-0.0221041	0.0269912
1,8,11	0.00622567	0.00575327	0.279208	-0.018322	0.0307733
1,8,12	0.00791432	0.00575335	0.16895	-0.0166337	0.0324623
1,8,13	-0.000800242	0.00575321	0.889376	-0.0253476	0.0237471
1,8,14	-0.00606621	0.00575328	0.291708	-0.0306139	0.0184815
1,8,15	-0.00289619	0.00575324	0.614685	-0.0274437	0.0216513
1,8,16	0.000842293	0.00575335	0.883606	-0.0237057	0.0253903
1,9,10	0.00152825	0.00575326	0.790523	-0.0230193	0.0260758
1,9,11	0.00631294	0.00575326	0.272523	-0.0182346	0.0308605
1,9,12	-0.00509786	0.00575334	0.375583	-0.0296458	0.0194501
1,9,13	0.00571863	0.00575319	0.32023	-0.0188287	0.0302659
1,9,14	-0.000877915	0.00575324	0.878718	-0.0254254	0.0236696
1,9,15	0.00168082	0.00575321	0.77017	-0.0228665	0.0262282
1,9,16	-0.00553057	0.00575331	0.336413	-0.0300784	0.0190172
1,10,11	0.00951908	0.00575326	0.0980199	-0.0150285	0.0340667
1,10,12	-0.0047051	0.00575334	0.413472	-0.029253	0.0198428
1,10,13	-0.0026065	0.00575319	0.650513	-0.0271538	0.0219408
1,10,14	-0.00531571	0.00575324	0.355516	-0.0298632	0.0192318
1,10,15	0.00196498	0.00575321	0.732694	-0.0225824	0.0265123
1,10,16	-0.000841212	0.00575331	0.883753	-0.025389	0.0237066
1,11,12	0.00302906	0.00575334	0.598552	-0.0215189	0.027577
1,11,13	0.00327003	0.00575322	0.569777	-0.0212774	0.0278174
1,11,14	0.00277697	0.00575327	0.629327	-0.0217707	0.0273246
1,11,15	0.000772066	0.00575323	0.893247	-0.0237754	0.0253195
1,11,16	-0.00320973	0.00575336	0.576923	-0.0277578	0.0213383
1,12,13	-0.000620224	0.00575327	0.914152	-0.0251679	0.0239274
1,12,14	0.00551918	0.00575332	0.33741	-0.0190287	0.030067
1,12,15	0.00169291	0.00575328	0.768566	-0.0228548	0.0262406
1,12,16	-0.0106584	0.00575339	0.0639523	-0.0352065	0.0138897
1,13,14	0.000626579	0.00575321	0.913275	-0.0239208	0.0251739
1,13,15	0.00411192	0.00575317	0.474783	-0.0204353	0.0286591
1,13,16	-0.0030283	0.00575327	0.598639	-0.0275759	0.0215193
1,14,15	0.00118793	0.00575324	0.836417	-0.0233596	0.0257355
1,14,16	0.0021242	0.00575337	0.711972	-0.0224239	0.0266723
1,15,16	-0.00383235	0.00575331	0.505341	-0.0283802	0.0207155
2,3,4	0.0122948	0.00575335	0.032604	-0.0122532	0.0368427
2,3,5	-0.0709045	0.0057535	7.40698e-35	-0.0954531	-0.0463558
2,3,6	0.0142686	0.00575334	0.013139	-0.0102794	0.0388165
2,3,7	-0.0126583	0.00575353	0.0278034	-0.0372071	0.0118904
2,3,8	-0.0165594	0.00575332	0.00400038	-0.0411073	0.00798844
2,3,9	0.0125976	0.00575331	0.0285549	-0.0119502	0.0371454
2,3,10	-0.0397333	0.00575331	5.02632e-12	-0.0642811	-0.0151855
2,3,11	-0.00321908	0.00575334	0.575812	-0.027767	0.0213288
2,3,12	0.000563542	0.00575344	0.921973	-0.0239848	0.0251119
2,3,13	-0.00358134	0.00575327	0.533623	-0.028129	0.0209663
2,3,14	0.00567583	0.00575335	0.323879	-0.0188721	0.0302238
2,3,15	0.000706036	0.00575328	0.90233	-0.0238417	0.0252537
2,3,16	-0.00748402	0.00575341	0.193333	-0.0320323	0.0170642
2,4,5	-0.00135612	0.00575345	0.813662	-0.0259045	0.0231923
2,4,6	0.00541175	0.00575331	0.346897	-0.0191361	0.0299596
2,4,7	-0.00955484	0.00575348	0.0967774	-0.0341034	0.0149937
2,4,8	-0.00575847	0.00575332	0.316881	-0.0303063	0.0187894
2,4,9	-0.00497702	0.00575328	0.387001	-0.0295247	0.0195707
2,4,10	-0.0067938	0.00575328	0.237664	-0.0313415	0.0177539
2,4,11	-0.0173385	0.00575331	0.00258227	-0.0418863	0.00720934
2,4,12	-0.00242929	0.00575339	0.672855	-0.0269774	0.0221189
2,4,13	0.00256599	0.00575324	0.655593	-0.0219815	0.0271135
2,4,14	-0.0102245	0.00575335	0.0755511	-0.0347724	0.0143235
2,4,15	0.000139111	0.00575328	0.98071	-0.0244086	0.0246868
2,4,16	-0.0038523	0.00575341	0.503136	-0.0284006	0.020696
2,5,6	0.00221017	0.00575349	0.700873	-0.0223384	0.0267588
2,5,7	-0.00877317	0.00575369	0.127316	-0.0333226	0.0157763
2,5,8	0.00117684	0.00575348	0.837929	-0.0233717	0.0257254
2,5,9	0.00537507	0.00575347	0.350188	-0.0191734	0.0299235
2,5,10	-0.0122286	0.00575347	0.0335542	-0.0367771	0.0123199
2,5,11	-0.00964671	0.00575349	0.0936118	-0.0341953	0.0149019
2,5,12	-0.00821581	0.00575362	0.153315	-0.032765	0.0163333
2,5,13	0.00129247	0.0057534	0.822256	-0.0232557	0.0258407
2,5,14	-0.00966684	0.00575345	0.0929272	-0.0342153	0.0148816
2,5,15	-0.00373176	0.00575341	0.516589	-0.02828	0.0208165
2,5,16	-0.00624921	0.00575354	0.277417	-0.030798	0.0182996
2,6,7	0.00469101	0.00575349	0.414885	-0.0198576	0.0292396
2,6,8	0.00136442	0.00575331	0.812538	-0.0231834	0.0259122
2,6,9	0.00782995	0.0057533	0.173534	-0.0167178	0.0323777
2,6,10	0.00676331	0.0057533	0.239777	-0.0177844	0.0313111
2,6,11	0.00669699	0.00575332	0.24442	-0.0178509	0.0312449
2,6,12	-0.000943728	0.00575343	0.869709	-0.025492	0.0236046
2,6,13	0.00196881	0.00575326	0.732195	-0.0225788	0.0265164
2,6,14	0.00278279	0.00575331	0.628611	-0.021765	0.0273306
2,6,15	-0.00375588	0.00575327	0.513871	-0.0283035	0.0207918
2,6,16	0.00605383	0.00575337	0.292702	-0.0184943	0.0306019
2,7,8	0.00596312	0.00575345	0.3	-0.0185853	0.0305115
2,7,9	0.0148557	0.00575344	0.00982375	-0.00969269	0.039404
2,7,10	0.00945167	0.00575344	0.100432	-0.0150967	0.034
2,7,11	0.0269901	0.00575349	2.72331e-06	0.00244152	0.0515387
2,7,12	0.00710738	0.0057536	0.216726	-0.0174417	0.0316564
2,7,13	0.000520607	0.0057534	0.927901	-0.0240276	0.0250688
2,7,14	0.00236794	0.00575348	0.680659	-0.0221806	0.0269165
2,7,15	0.00246463	0.00575341	0.668379	-0.0220836	0.0270129
2,7,16	0.0156971	0.00575357	0.0063691	-0.00885181	0.040246
2,8,9	-0.00147241	0.00575331	0.798011	-0.0260202	0.0230754
2,8,10	0.0106324	0.00575331	0.0646004	-0.0139154	0.0351802
2,8,11	0.0069133	0.00575331	0.229515	-0.0176345	0.0314611
2,8,12	0.00455289	0.00575341	0.428751	-0.0199954	0.0291011
2,8,13	0.00408294	0.00575324	0.477908	-0.0204646	0.0286305
2,8,14	-0.00140582	0.00575332	0.806962	-0.0259537	0.0231421
2,8,15	-0.00460897	0.00575328	0.423076	-0.0291567	0.0199387
2,8,16	0.00355232	0.00575339	0.536953	-0.0209958	0.0281005
2,9,10	0.0172673	0.0057533	0.00268949	-0.00728048	0.041815
2,9,11	0.0253365	0.0057533	1.06533e-05	0.000788763	0.0498843
2,9,12	0.00242448	0.0057534	0.673465	-0.0221237	0.0269727
2,9,13	0.00154004	0.00575323	0.788944	-0.0230074	0.0260875
2,9,14	0.0016824	0.00575328	0.769963	-0.0228653	0.0262301
2,9,15	0.00492339	0.00575324	0.392134	-0.0196241	0.0294709
2,9,16	0.00704405	0.00575335	0.220829	-0.0175039	0.031592
2,10,11	0.0197583	0.0057533	0.000594566	-0.00478947	0.044306
2,10,12	-0.00109757	0.0057534	0.848707	-0.0256458	0.0234506
2,10,13	0.00234967	0.00575323	0.682975	-0.0221978	0.0268972
2,10,14	-0.000149044	0.00575328	0.979333	-0.0246967	0.0243987
2,10,15	-0.0107717	0.00575324	0.0611723	-0.0353192	0.0137758
2,10,16	0.00338905	0.00575335	0.555825	-0.0211589	0.027937
2,11,12	-0.00799409	0.0057534	0.1647	-0.0325423	0.0165541
2,11,13	0.00512221	0.00575326	0.3733	-0.0194254	0.0296698
2,11,14	0.00504646	0.00575331	0.380413	-0.0195013	0.0295943
2,11,15	-0.0120909	0.00575327	0.0355946	-0.0366386	0.0124567
2,11,16	0.0128005	0.0057534	0.0260945	-0.0117477	0.0373487
2,12,13	-0.00693493	0.00575334	0.228063	-0.0314829	0.017613
2,12,14	0.0013344	0.00575339	0.816592	-0.0232138	0.0258825
2,12,15	0.00331798	0.00575335	0.564141	-0.02123	0.027866
2,12,16	0.00251666	0.00575345	0.661811	-0.0220318	0.0270651
2,13,14	-0.00044088	0.00575324	0.938917	-0.0249884	0.0241067
2,13,15	-0.00260752	0.00575321	0.650385	-0.0271549	0.0219398
2,13,16	-0.00184464	0.00575331	0.748498	-0.0263925	0.0227032
2,14,15	0.00394023	0.00575328	0.49343	-0.0206075	0.0284879
2,14,16	0.00501869	0.00575341	0.383049	-0.0195296	0.029567
2,15,16	0.00116255	0.00575335	0.839867	-0.0233854	0.0257105
3,4,5	0.147572	0.0057534	2.36451e-144	0.123024	0.17212
3,4,6	-0.000854672	0.00575328	0.881906	-0.0254024	0.023693
3,4,7	-0.0566377	0.00575348	7.55137e-23	-0.0811863	-0.0320892
3,4,8	0.0234624	0.00575327	4.54606e-05	-0.00108522	0.0480101
3,4,9	-0.0111877	0.00575326	0.05183	-0.0357353	0.0133599
3,4,10	-0.0622634	0.00575326	2.8532e-27	-0.0868109	-0.0377158
3,4,11	-0.0693627	0.00575331	1.95982e-33	-0.0939105	-0.0448149
3,4,12	-0.0157726	0.00575333	0.00611826	-0.0403205	0.00877534
3,4,13	-0.0123483	0.00575324	0.0318514	-0.0368958	0.0121992
3,4,14	-0.00500342	0.00575335	0.384493	-0.0295514	0.0195446
3,4,15	0.0211128	0.00575326	0.000243023	-0.00343478	0.0456604
3,4,16	-0.0239384	0.00575341	3.17658e-05	-0.0484866	0.000609878
3,5,6	-0.0135259	0.00575341	0.0187298	-0.0380741	0.0110224
3,5,7	-0.0637193	0.00575363	1.76983e-28	-0.0882685	-0.0391701
3,5,8	-0.144097	0.00575337	9.22081e-138	-0.168645	-0.119549
3,5,9	0.00626803	0.00575339	0.27596	-0.0182801	0.0308162
3,5,10	-0.129917	0.00575339	1.8673e-112	-0.154465	-0.105369
3,5,11	-0.156477	0.00575344	6.07824e-162	-0.181026	-0.131929
3,5,12	0.0097091	0.00575352	0.0915109	-0.0148396	0.0342578
3,5,13	-0.0141881	0.00575335	0.0136636	-0.0387361	0.0103599
3,5,14	0.00296869	0.0057534	0.605864	-0.0215795	0.0275169
3,5,15	0.0544314	0.00575334	3.15556e-21	0.0298835	0.0789793
3,5,16	-0.0232054	0.00575349	5.50689e-05	-0.047754	0.00134316
3,6,7	0.00563942	0.00575347	0.327002	-0.0189091	0.0301879
3,6,8	0.00615281	0.00575323	0.28487	-0.0183947	0.0307003
3,6,9	0.00349407	0.00575324	0.543639	-0.0210535	0.0280416
3,6,10	0.0437924	0.00575324	2.74117e-14	0.0192448	0.0683399
3,6,11	0.0209925	0.0057533	0.000263695	-0.00355521	0.0455403
3,6,12	-0.00310214	0.00575335	0.589758	-0.0276501	0.0214458
3,6,13	0.00224409	0.00575323	0.696496	-0.0223034	0.0267916
3,6,14	0.00587695	0.00575328	0.307024	-0.0186707	0.0304247
3,6,15	0.00439062	0.00575322	0.445371	-0.0201568	0.028938
3,6,16	-0.00289911	0.00575335	0.614334	-0.0274471	0.0216489
3,7,8	-0.0968926	0.0057534	1.68519e-63	-0.121441	-0.0723444
3,7,9	0.0337252	0.00575341	4.60223e-09	0.00917695	0.0582735
3,7,10	0.03666	0.00575341	1.8802e-10	0.0121118	0.0612083
3,7,11	-0.0753449	0.00575349	3.92991e-39	-0.0998935	-0.0507963
3,7,12	-0.0707481	0.00575354	1.03745e-34	-0.0952969	-0.0461993
3,7,13	-0.00465248	0.0057534	0.418721	-0.0292007	0.0198957
3,7,14	-0.00448541	0.00575348	0.435629	-0.0290339	0.0200631
3,7,15	-0.00199521	0.00575339	0.728752	-0.0265434	0.0225529
3,7,16	-0.0462498	0.00575357	9.25441e-16	-0.0707987	-0.0217009
3,8,9	-0.0184461	0.00575323	0.0013456	-0.0429936	0.00610137
3,8,10	-0.197111	0.00575323	6.70441e-255	-0.221658	-0.172563
3,8,11	-0.230968	0.00575326	0	-0.255515	-0.20642
3,8,12	-0.017844	0.00575331	0.00192611	-0.0423918	0.00670377
3,8,13	-0.0142444	0.00575319	0.0132925	-0.0387917	0.0103029
3,8,14	-0.000642598	0.00575327	0.911067	-0.0251902	0.023905
3,8,15	0.0146837	0.00575321	0.0107048	-0.00986366	0.0392311
3,8,16	-0.0453804	0.00575334	3.1282e-15	-0.0699283	-0.0208324
3,9,10	0.127069	0.00575324	1.09463e-107	0.102521	0.151616
3,9,11	-0.00440583	0.00575327	0.443801	-0.0289535	0.0201418
3,9,12	-0.015633	0.00575332	0.00658513	-0.0401809	0.00891484
3,9,13	0.000208586	0.00575321	0.971079	-0.0243388	0.024756
3,9,14	-0.00885523	0.00575326	0.123768	-0.0334028	0.0156924
3,9,15	-0.0163246	0.00575319	0.00454853	-0.0408719	0.00822273
3,9,16	-0.00541551	0.00575332	0.346563	-0.0299634	0.0191324
3,10,11	0.0411549	0.00575327	8.56333e-13	0.0166072	0.0657025
3,10,12	0.0477921	0.00575332	1.00193e-16	0.0232442	0.0723399
3,10,13	-0.0240781	0.00575321	2.85352e-05	-0.0486254	0.000469284
3,10,14	0.0119293	0.00575326	0.0381315	-0.0126183	0.0364769
3,10,15	0.0426382	0.00575319	1.26702e-13	0.0180909	0.0671855
3,10,16	-0.0196862	0.00575332	0.000622683	-0.0442341	0.00486167
3,11,12	-0.110949	0.00575335	1.26082e-82	-0.135497	-0.0864013
3,11,13	-0.0148842	0.00575326	0.00968113	-0.0394318	0.00966337
3,11,14	-0.00381835	0.00575331	0.506898	-0.0283662	0.0207295
3,11,15	-0.0178578	0.00575324	0.00191033	-0.0424054	0.00668969
3,11,16	-0.0827857	0.0057534	7.20005e-47	-0.107334	-0.0582375
3,12,13	0.000711069	0.00575328	0.901638	-0.0238366	0.0252588
3,12,14	0.00734681	0.00575333	0.201619	-0.0172011	0.0318947
3,12,15	-0.0188673	0.00575327	0.00104084	-0.0434149	0.00568036
3,12,16	-0.0192669	0.0057534	0.000812168	-0.0438151	0.00528135
3,13,14	-0.00498424	0.00575324	0.38631	-0.0295318	0.0195633
3,13,15	-0.0097918	0.00575318	0.0887638	-0.0343391	0.0147555
3,13,16	-0.00582489	0.00575331	0.311331	-0.0303727	0.0187229
3,14,15	-0.00804293	0.00575326	0.162124	-0.0325905	0.0165047
3,14,16	-0.00256011	0.00575341	0.656341	-0.0271084	0.0219881
3,15,16	0.0239359	0.00575332	3.18168e-05	-0.000611979	0.0484838
4,5,6	-0.0185008	0.00575336	0.00130215	-0.0430488	0.00604723
4,5,7	0.121936	0.00575356	2.45628e-99	0.0973874	0.146485
4,5,8	0.102763	0.00575335	3.52854e-71	0.0782153	0.127311
4,5,9	-0.0326972	0.00575334	1.32797e-08	-0.0572451	-0.0081493
4,5,10	-0.00144596	0.00575334	0.801563	-0.0259939	0.023102
4,5,11	0.19206	0.00575339	3.27378e-242	0.167512	0.216608
4,5,12	0.0985258	0.00575344	1.36809e-65	0.0739775	0.123074
4,5,13	0.0107179	0.0057533	0.0624795	-0.0138299	0.0352656
4,5,14	0.00449534	0.00575337	0.434606	-0.0200528	0.0290434
4,5,15	0.0208156	0.00575331	0.000297104	-0.00373225	0.0453634
4,5,16	0.105438	0.00575347	8.04526e-75	0.0808893	0.129986
4,6,7	-0.0022403	0.00575341	0.696992	-0.0267886	0.022308
4,6,8	0.00240369	0.00575323	0.676096	-0.0221438	0.0269512
4,6,9	0.00418824	0.00575322	0.466627	-0.0203592	0.0287357
4,6,10	-0.0145172	0.00575322	0.0116278	-0.0390646	0.0100302
4,6,11	-0.0153467	0.00575327	0.00764418	-0.0398944	0.00920091
4,6,12	-0.00869471	0.0057533	0.130728	-0.0332425	0.015853
4,6,13	0.00181449	0.00575321	0.752469	-0.0227329	0.0263619
4,6,14	-0.0010917	0.00575328	0.849504	-0.0256394	0.023456
4,6,15	0.000871243	0.00575322	0.879632	-0.0236762	0.0254187
4,6,16	-0.00546086	0.00575335	0.342542	-0.0300088	0.0190871
4,7,8	-0.00525045	0.00575337	0.361464	-0.0297985	0.0192976
4,7,9	0.00448311	0.00575336	0.435856	-0.0200649	0.0290311
4,7,10	-0.0253987	0.00575336	1.01374e-05	-0.0499467	-0.000850647
4,7,11	-0.0619543	0.00575344	5.13449e-27	-0.0865026	-0.0374059
4,7,12	-0.0048568	0.00575347	0.398588	-0.0294053	0.0196917
4,7,13	0.00704272	0.00575335	0.220916	-0.0175053	0.0315907
4,7,14	0.000155313	0.00575345	0.978464	-0.0243931	0.0247037
4,7,15	-0.00510162	0.00575336	0.375233	-0.0296497	0.0194464
4,7,16	0.0155912	0.00575354	0.00673337	-0.00895762	0.04014
4,8,9	0.012316	0.00575323	0.0323019	-0.0122315	0.0368634
4,8,10	-0.0638629	0.00575323	1.32837e-28	-0.0884103	-0.0393154
4,8,11	-0.0886822	0.00575326	1.64423e-53	-0.11323	-0.0641346
4,8,12	0.00344072	0.00575328	0.549812	-0.021107	0.0279884
4,8,13	0.000672071	0.00575319	0.907005	-0.0238752	0.0252194
4,8,14	-0.00348819	0.0057533	0.544321	-0.0280359	0.0210596
4,8,15	-0.000765552	0.00575323	0.894143	-0.025313	0.0237819
4,8,16	-0.0106194	0.00575336	0.0649295	-0.0351674	0.0139286
4,9,10	-0.0289899	0.00575322	4.69516e-07	-0.0535373	-0.00444245
4,9,11	-0.00437788	0.00575324	0.446696	-0.0289254	0.0201697
4,9,12	-0.00746285	0.00575327	0.194585	-0.0320105	0.0170848
4,9,13	0.0030664	0.00575318	0.594041	-0.0214809	0.0276137
4,9,14	-0.000902697	0.00575326	0.875323	-0.0254503	0.0236449
4,9,15	-0.00948028	0.00575319	0.0993928	-0.0340276	0.015067
4,9,16	-0.000596113	0.00575332	0.917478	-0.025144	0.0239518
4,10,11	-0.0952744	0.00575324	1.82616e-61	-0.119822	-0.0707269
4,10,12	-0.0179435	0.00575327	0.00181653	-0.0424911	0.00660418
4,10,13	0.00202055	0.00575318	0.725435	-0.0225267	0.0265678
4,10,14	0.00562522	0.00575326	0.328204	-0.0189224	0.0301728
4,10,15	0.0049582	0.00575319	0.388791	-0.0195891	0.0295055
4,10,16	-0.0146206	0.00575332	0.0110483	-0.0391684	0.00992728
4,11,12	-0.00671421	0.0057533	0.243207	-0.031262	0.0178335
4,11,13	-0.0091699	0.00575323	0.11097	-0.0337174	0.0153776
4,11,14	-0.00884988	0.00575331	0.123999	-0.0333977	0.0156979
4,11,15	0.00354442	0.00575324	0.537849	-0.0210031	0.0280919
4,11,16	-0.0269941	0.0057534	2.71311e-06	-0.0515423	-0.0024459
4,12,13	0.00655434	0.00575323	0.254605	-0.0179931	0.0311018
4,12,14	-0.00348123	0.00575331	0.545127	-0.028029	0.0210666
4,12,15	-0.000782231	0.00575324	0.891851	-0.0253298	0.0237653
4,12,16	-0.00661796	0.00575337	0.250035	-0.0311661	0.0179301
4,13,14	-0.00325236	0.00575324	0.571866	-0.0277999	0.0212952
4,13,15	-0.000634772	0.00575318	0.912145	-0.025182	0.0239125
4,13,16	-0.000878859	0.00575331	0.87859	-0.0254267	0.023669
4,14,15	0.00598956	0.00575328	0.297848	-0.0185581	0.0305373
4,14,16	-0.00300584	0.00575344	0.601364	-0.0275542	0.0215425
4,15,16	-0.0153701	0.00575335	0.00755332	-0.039918	0.00917793
5,6,7	0.00119858	0.0057536	0.834981	-0.0233505	0.0257476
5,6,8	-0.00298445	0.00575336	0.603949	-0.0275325	0.0215636
5,6,9	0.00556896	0.00575337	0.333074	-0.0189791	0.0301171
5,6,10	0.00790142	0.00575337	0.169647	-0.0166467	0.0324495
5,6,11	0.0153491	0.00575343	0.00763644	-0.0091992	0.0398974
5,6,12	-0.00165967	0.0057535	0.772994	-0.0262083	0.022889
5,6,13	0.00691367	0.00575334	0.229492	-0.0176342	0.0314616
5,6,14	0.00140599	0.00575336	0.806939	-0.023142	0.025954
5,6,15	-0.00336617	0.00575332	0.558495	-0.027914	0.0211817
5,6,16	0.00294502	0.00575345	0.608744	-0.0216034	0.0274934
5,7,8	0.016901	0.00575353	0.00330991	-0.00764777	0.0414497
5,7,9	0.0400402	0.00575354	3.45489e-12	0.0154914	0.064589
5,7,10	0.0428843	0.00575354	9.20182e-14	0.0183355	0.0674332
5,7,11	-0.0146186	0.00575362	0.0110633	-0.0391678	0.00993052
5,7,12	0.00046122	0.0057537	0.93611	-0.0240883	0.0250107
5,7,13	0.00635261	0.00575351	0.269541	-0.018196	0.0309013
5,7,14	0.00136199	0.00575356	0.812874	-0.0231869	0.0259109
5,7,15	-0.0179303	0.00575349	0.00183145	-0.0424789	0.00661831
5,7,16	0.0297834	0.00575368	2.26889e-07	0.00523401	0.0543328
5,8,9	-0.0326356	0.00575336	1.41396e-08	-0.0571836	-0.00808754
5,8,10	0.0671298	0.00575336	2.00283e-31	0.0425818	0.0916778
5,8,11	-0.0310388	0.00575339	6.88203e-08	-0.0555869	-0.00649062
5,8,12	0.0221517	0.00575347	0.000118164	-0.00239679	0.0467002
5,8,13	-0.0134182	0.0057533	0.0196902	-0.0379659	0.0111296
5,8,14	-0.00352106	0.00575335	0.540538	-0.028069	0.0210269
5,8,15	0.0140734	0.00575331	0.0144422	-0.0104744	0.0386212
5,8,16	0.017126	0.00575344	0.00291519	-0.00742234	0.0416744
5,9,10	0.0272631	0.00575337	2.15637e-06	0.00271502	0.0518112
5,9,11	0.0184275	0.0057534	0.00136121	-0.00612066	0.0429757
5,9,12	-0.0132382	0.00575348	0.0214	-0.0377868	0.0113103
5,9,13	0.00756246	0.00575331	0.188698	-0.0169854	0.0321103
5,9,14	-0.00621566	0.00575334	0.279987	-0.0307636	0.0183323
5,9,15	-0.00960091	0.0057533	0.0951686	-0.0341487	0.0149468
5,9,16	-0.00674397	0.00575343	0.241135	-0.0312923	0.0178043
5,10,11	0.0349816	0.0057534	1.20744e-09	0.0104334	0.0595298
5,10,12	0.0209252	0.00575348	0.000276097	-0.00362337	0.0454737
5,10,13	-0.000144387	0.00575331	0.979978	-0.0246922	0.0244034
5,10,14	0.00445892	0.00575334	0.438334	-0.020089	0.0290068
5,10,15	0.0147086	0.0057533	0.0105741	-0.0098392	0.0392563
5,10,16	0.0137093	0.00575343	0.0171843	-0.010839	0.0382576
5,11,12	-0.0157545	0.00575351	0.00617865	-0.0403031	0.00879417
5,11,13	-0.00555276	0.00575336	0.334482	-0.0301008	0.0189953
5,11,14	-0.00246939	0.00575339	0.667775	-0.0270175	0.0220788
5,11,15	0.0123353	0.00575335	0.0320344	-0.0122126	0.0368833
5,11,16	0.0142417	0.0057535	0.013315	-0.010307	0.0387903
5,12,13	-0.00122689	0.00575341	0.831135	-0.0257752	0.0233214
5,12,14	-0.00460573	0.00575344	0.423414	-0.0291541	0.0199426
5,12,15	-0.0162995	0.0057534	0.00461264	-0.0408477	0.00824875
5,12,16	0.00275427	0.00575353	0.632146	-0.0217945	0.027303
5,13,14	-0.0124037	0.0057533	0.0310928	-0.0369515	0.012144
5,13,15	0.0119401	0.00575326	0.0379566	-0.0126075	0.0364877
5,13,16	0.00239471	0.00575339	0.677246	-0.0221534	0.0269429
5,14,15	-0.00283169	0.00575331	0.62259	-0.0273795	0.0217161
5,14,16	-0.00685313	0.00575347	0.233607	-0.0314016	0.0176953
5,15,16	0.0392315	0.0057534	9.26002e-12	0.0146833	0.0637797
6,7,8	0.0130574	0.00575336	0.0232403	-0.0114907	0.0376054
6,7,9	0.00667266	0.00575337	0.246142	-0.0178754	0.0312208
6,7,10	0.0113198	0.00575337	0.0491294	-0.0132283	0.0358679
6,7,11	0.00386883	0.00575345	0.501308	-0.0206796	0.0284173
6,7,12	0.000337376	0.0057535	0.95324	-0.0242113	0.024886
6,7,13	0.0064733	0.00575336	0.260536	-0.0180747	0.0310213
6,7,14	-0.00615544	0.00575341	0.284679	-0.0307037	0.0183928
6,7,15	0.00794543	0.00575335	0.167281	-0.0166026	0.0324934
6,7,16	0.0125908	0.0057535	0.0286467	-0.0119579	0.0371394
6,8,9	-0.00318738	0.00575322	0.579569	-0.0277348	0.02136
6,8,10	0.00284735	0.00575322	0.620663	-0.0217001	0.0273948
6,8,11	-0.00774729	0.00575324	0.178116	-0.0322948	0.0168002
6,8,12	0.0056741	0.0057533	0.324022	-0.0188737	0.0302219
6,8,13	0.00179946	0.00575318	0.754452	-0.0227478	0.0263467
6,8,14	-0.000682386	0.00575323	0.905585	-0.0252299	0.0238651
6,8,15	-0.000551646	0.00575319	0.923612	-0.025099	0.0239957
6,8,16	-0.000872088	0.0057533	0.879518	-0.0254198	0.0236757
6,9,10	0.0139082	0.00575323	0.0156324	-0.0106393	0.0384556
6,9,11	0.00977129	0.00575326	0.0894387	-0.0147763	0.0343189
6,9,12	0.00475008	0.00575331	0.40902	-0.0197977	0.0292979
6,9,13	0.00306584	0.00575319	0.594109	-0.0214815	0.0276132
6,9,14	0.0030708	0.00575322	0.593514	-0.0214766	0.0276182
6,9,15	0.000161493	0.00575318	0.977606	-0.0243858	0.0247087
6,9,16	0.00932619	0.00575328	0.105018	-0.0152215	0.0338739
6,10,11	0.00750409	0.00575326	0.192129	-0.0170435	0.0320517
6,10,12	0.00926827	0.00575331	0.107196	-0.0152795	0.0338161
6,10,13	0.000326379	0.00575319	0.95476	-0.0242209	0.0248737
6,10,14	-0.000244683	0.00575322	0.966077	-0.0247921	0.0243027
6,10,15	-0.000261976	0.00575318	0.96368	-0.0248092	0.0242853
6,10,16	0.00113499	0.00575328	0.843612	-0.0234127	0.0256827
6,11,12	-0.00237093	0.00575334	0.680271	-0.0269188	0.022177
6,11,13	-0.00514602	0.00575324	0.371081	-0.0296936	0.0194015
6,11,14	-0.00597013	0.00575327	0.299417	-0.0305178	0.0185775
6,11,15	-0.00556913	0.00575323	0.333048	-0.0301166	0.0189784
6,11,16	-0.000406043	0.00575336	0.943736	-0.0249541	0.024142
6,12,13	0.00819206	0.00575327	0.154481	-0.0163556	0.0327397
6,12,14	0.00842096	0.0057533	0.143287	-0.0161268	0.0329687
6,12,15	0.000793141	0.00575326	0.890352	-0.0237544	0.0253407
6,12,16	0.000718772	0.00575336	0.900579	-0.0238293	0.0252668
6,13,14	-0.00292087	0.00575321	0.61167	-0.0274682	0.0216265
6,13,15	0.00195624	0.00575317	0.733836	-0.022591	0.0265034
6,13,16	0.000905115	0.00575327	0.874992	-0.0236425	0.0254528
6,14,15	0.000718864	0.00575322	0.900564	-0.0238286	0.0252663
6,14,16	-0.000570388	0.00575335	0.921027	-0.0251184	0.0239776
6,15,16	0.00574745	0.00575328	0.317805	-0.0188002	0.0302951
7,8,9	0.0898291	0.00575334	7.47932e-55	0.0652812	0.114377
7,8,10	0.0883798	0.00575334	3.70513e-53	0.0638319	0.112928
7,8,11	0.216614	0.00575339	8.60911e-307	0.192065	0.241162
7,8,12	-0.002251	0.00575344	0.695618	-0.0267994	0.0222974
7,8,13	-0.00794056	0.0057533	0.167537	-0.0324883	0.0166072
7,8,14	-0.00937238	0.00575337	0.103313	-0.0339205	0.0151757
7,8,15	-0.00709296	0.00575331	0.217637	-0.0316408	0.0174549
7,8,16	0.0199461	0.00575347	0.000527033	-0.00460233	0.0444946
7,9,10	0.027853	0.00575335	1.2938e-06	0.00330498	0.0524009
7,9,11	0.101986	0.0057534	3.90052e-70	0.0774376	0.126534
7,9,12	-0.0290062	0.00575345	4.63116e-07	-0.0535546	-0.00445775
7,9,13	-0.00209847	0.00575331	0.715306	-0.0266463	0.0224493
7,9,14	-0.00416161	0.00575336	0.469477	-0.0287096	0.0203864
7,9,15	-0.0184805	0.0057533	0.00131808	-0.0430283	0.00606726
7,9,16	0.0149695	0.00575345	0.00927481	-0.00957889	0.039518
7,10,11	0.0728321	0.0057534	1.10637e-36	0.0482839	0.0973803
7,10,12	-0.028701	0.00575345	6.10191e-07	-0.0532494	-0.00415254
7,10,13	0.00143873	0.00575331	0.802534	-0.0231091	0.0259865
7,10,14	-0.0166723	0.00575336	0.00375879	-0.0412203	0.00787575
7,10,15	-0.0350164	0.0057533	1.16201e-09	-0.0595641	-0.0104686
7,10,16	0.0204549	0.00575345	0.000377907	-0.0040935	0.0450033
7,11,12	-0.0207159	0.00575351	0.000317772	-0.0452645	0.00383278
7,11,13	0.00237285	0.00575339	0.680028	-0.0221753	0.026921
7,11,14	0.00612986	0.00575344	0.286688	-0.0184185	0.0306782
7,11,15	-0.0123718	0.00575338	0.0315306	-0.0369199	0.0121763
7,11,16	0.0105628	0.00575356	0.0663816	-0.0139861	0.0351117
7,12,13	-0.0129874	0.00575341	0.0239899	-0.0375357	0.0115608
7,12,14	0.0100042	0.00575347	0.0820741	-0.0145443	0.0345526
7,12,15	0.00165884	0.0057534	0.7731	-0.0228894	0.026207
7,12,16	-0.0273114	0.00575356	2.07033e-06	-0.0518603	-0.00276257
7,13,14	-0.0200992	0.00575335	0.000477108	-0.0446471	0.00444881
7,13,15	-0.00257633	0.00575328	0.654297	-0.027124	0.0219714
7,13,16	0.00501342	0.00575344	0.383552	-0.019535	0.0295618
7,14,15	0.00256366	0.00575336	0.655892	-0.0219844	0.0271117
7,14,16	0.00379308	0.00575354	0.509731	-0.0207557	0.0283419
7,15,16	0.033067	0.00575345	9.10838e-09	0.00851853	0.0576154
8,9,10	-0.100013	0.00575324	1.57495e-67	-0.124561	-0.0754656
8,9,11	0.0488221	0.00575324	2.18428e-17	0.0242745	0.0733696
8,9,12	0.0285226	0.0057533	7.15528e-07	0.00397481	0.0530703
8,9,13	-0.0139512	0.00575318	0.0153134	-0.0384984	0.0105961
8,9,14	-0.00705279	0.00575323	0.220247	-0.0316003	0.0174947
8,9,15	-0.000868517	0.00575319	0.880006	-0.0254158	0.0236788
8,9,16	0.00152797	0.0057533	0.790563	-0.0230198	0.0260757
8,10,11	-0.124723	0.00575324	7.80648e-104	-0.149271	-0.100176
8,10,12	0.0659483	0.0057533	2.17677e-30	0.0414006	0.0904961
8,10,13	-0.0190893	0.00575318	0.000907005	-0.0436366	0.00545793
8,10,14	-0.0118535	0.00575323	0.0393722	-0.036401	0.012694
8,10,15	0.00618198	0.00575319	0.282589	-0.0183653	0.0307293
8,10,16	0.0224196	0.0057533	9.75598e-05	-0.00212812	0.0469674
8,11,12	-0.0286386	0.0057533	6.4491e-07	-0.0531863	-0.00409082
8,11,13	-0.00766053	0.00575321	0.183022	-0.0322079	0.0168868
8,11,14	0.00457369	0.00575326	0.426632	-0.0199739	0.0291213
8,11,15	0.0300966	0.00575322	1.68893e-07	0.00554918	0.054644
8,11,16	0.00548262	0.00575335	0.340622	-0.0190654	0.0300306
8,12,13	0.0128524	0.00575323	0.0254899	-0.011695	0.0373999
8,12,14	0.0144322	0.00575328	0.0121262	-0.0101155	0.03898
8,12,15	0.00448113	0.00575324	0.436049	-0.0200664	0.0290287
8,12,16	-0.00289494	0.00575335	0.614843	-0.0274429	0.021653
8,13,14	0.00317614	0.00575319	0.580905	-0.0213712	0.0277235
8,13,15	0.00840528	0.00575315	0.144024	-0.0161419	0.0329524
8,13,16	0.0123382	0.00575326	0.0319925	-0.0122094	0.0368857
8,14,15	0.0013361	0.00575323	0.816357	-0.0232114	0.0258836
8,14,16	-0.0018057	0.00575336	0.753635	-0.0263537	0.0227423
8,15,16	0.00199962	0.0057533	0.728171	-0.0225481	0.0265474
9,10,11	0.133279	0.00575326	3.14528e-118	0.108732	0.157827
9,10,12	-0.0236825	0.00575331	3.8546e-05	-0.0482303	0.000865352
9,10,13	-0.00272915	0.00575319	0.635236	-0.0272765	0.0218182
9,10,14	-0.0140052	0.00575322	0.0149221	-0.0385527	0.0105422
9,10,15	-0.0252285	0.00575318	1.16094e-05	-0.0497758	-0.000681289
9,10,16	0.0187071	0.00575328	0.00114838	-0.00584062	0.0432548
9,11,12	0.0153724	0.00575331	0.0075439	-0.00917545	0.0399202
9,11,13	0.00401696	0.00575322	0.485048	-0.0205305	0.0285644
9,11,14	0.00677284	0.00575324	0.239112	-0.0177747	0.0313204
9,11,15	-0.014836	0.00575321	0.00991828	-0.0393834	0.00971133
9,11,16	0.029948	0.00575334	1.94267e-07	0.00540004	0.0544959
9,12,13	0.0026451	0.00575324	0.645691	-0.0219024	0.0271926
9,12,14	0.0137095	0.00575327	0.0171795	-0.0108381	0.0382572
9,12,15	-0.0129912	0.00575323	0.0239447	-0.0375387	0.0115563
9,12,16	0.0136413	0.00575334	0.0177415	-0.0109066	0.0381893
9,13,14	0.0159223	0.00575318	0.00564929	-0.00862495	0.0404696
9,13,15	-0.00702033	0.00575314	0.222371	-0.0315674	0.0175268
9,13,16	0.00507972	0.00575324	0.377276	-0.0194678	0.0296273
9,14,15	0.0142666	0.00575319	0.0131494	-0.0102807	0.0388139
9,14,16	0.0126249	0.00575332	0.0282121	-0.0119229	0.0371728
9,15,16	-0.00366837	0.00575326	0.523725	-0.028216	0.0208792
10,11,12	-0.0659487	0.00575331	2.1757e-30	-0.0904965	-0.0414009
10,11,13	-0.00736368	0.00575322	0.200577	-0.0319111	0.0171837
10,11,14	-0.0111262	0.00575324	0.0531295	-0.0356738	0.0134213
10,11,15	0.0288973	0.00575321	5.10593e-07	0.0043499	0.0534446
10,11,16	0.0181493	0.00575334	0.00160807	-0.00639859	0.0426973
10,12,13	0.00358665	0.00575324	0.533015	-0.0209609	0.0281342
10,12,14	0.00312054	0.00575327	0.587549	-0.0214271	0.0276682
10,12,15	-0.0489386	0.00575323	1.83465e-17	-0.0734861	-0.0243912
10,12,16	-0.00949592	0.00575334	0.0988443	-0.0340438	0.015052
10,13,14	0.00900622	0.00575318	0.117486	-0.015541	0.0335535
10,13,15	0.0144236	0.00575314	0.0121758	-0.0101235	0.0389707
10,13,16	-0.000257399	0.00575324	0.964315	-0.0248049	0.0242901
10,14,15	-0.00394877	0.00575319	0.492487	-0.0284961	0.0205985
10,14,16	0.000419004	0.00575332	0.941943	-0.0241289	0.0249669
10,15,16	-0.0128285	0.00575326	0.0257659	-0.0373761	0.0117191
11,12,13	0.00524377	0.00575327	0.362066	-0.0193039	0.0297914
11,12,14	0.00378793	0.0057533	0.510288	-0.0207598	0.0283357
11,12,15	-0.00844644	0.00575326	0.142078	-0.032994	0.0161012
11,12,16	0.0016844	0.00575339	0.769702	-0.0228637	0.0262325
11,13,14	0.000398959	0.00575323	0.944715	-0.0241485	0.0249464
11,13,15	0.00424687	0.00575319	0.46041	-0.0203004	0.0287942
11,13,16	0.00610772	0.00575332	0.288422	-0.0184401	0.0306556
11,14,15	-0.00626798	0.00575324	0.275951	-0.0308155	0.0182796
11,14,16	-0.00911677	0.0057534	0.113065	-0.033665	0.0154314
11,15,16	0.0381168	0.00575334	3.49656e-11	0.0135688	0.0626647
12,13,14	0.00228427	0.00575323	0.691339	-0.0222632	0.0268317
12,13,15	0.0032561	0.00575319	0.57142	-0.0212912	0.0278034
12,13,16	-0.00573891	0.0057533	0.318526	-0.0302867	0.0188088
12,14,15	0.00683391	0.00575324	0.234903	-0.0177136	0.0313814
12,14,16	0.00341443	0.00575337	0.552872	-0.0211337	0.0279625
12,15,16	0.00615273	0.00575331	0.284883	-0.0183951	0.0307005
13,14,15	-0.00463278	0.00575318	0.420675	-0.02918	0.0199145
13,14,16	0.006415	0.00575331	0.26485	-0.0181328	0.0309628
13,15,16	-0.0545727	0.00575324	2.49146e-21	-0.0791202	-0.0300252
14,15,16	0.00928086	0.00575335	0.106723	-0.0152671	0.0338288
1,2,3,4	-0.00814244	0.00307528	0.00810604	-0.0212638	0.00497895
1,2,3,5	-0.0127264	0.00307528	3.50352e-05	-0.0258478	0.000394973
1,2,3,6	0.00675653	0.00307528	0.0280207	-0.00636485	0.0198779
1,2,3,7	-0.00402494	0.00307528	0.190605	-0.0171463	0.00909645
1,2,3,8	-0.00109159	0.00307528	0.722623	-0.014213	0.0120298
1,2,3,9	-0.00370951	0.00307528	0.227731	-0.0168309	0.00941188
1,2,3,10	0.00759703	0.00307528	0.0135006	-0.00552436	0.0207184
1,2,3,11	0.00222815	0.00307528	0.46874	-0.0108932	0.0153495
1,2,3,12	-0.00200505	0.00307528	0.514411	-0.0151264	0.0111163
1,2,3,13	7.98296e-05	0.00307528	0.979291	-0.0130416	0.0132012
1,2,3,14	0.00135416	0.00307528	0.659695	-0.0117672	0.0144755
1,2,3,15	-0.00287105	0.00307528	0.350519	-0.0159924	0.0102503
1,2,3,16	-0.000499488	0.00307528	0.870975	-0.0136209	0.0126219
1,2,4,5	0.012393	0.00307528	5.5874e-05	-0.000728418	0.0255144
1,2,4,6	-0.0127918	0.00307528	3.19286e-05	-0.0259132	0.000329579
1,2,4,7	0.00170961	0.00307528	0.578266	-0.0114118	0.014831
1,2,4,8	0.000725358	0.00307528	0.813536	-0.012396	0.0138467
1,2,4,9	0.0029231	0.00307528	0.341854	-0.0101983	0.0160445
1,2,4,10	-0.00136388	0.00307528	0.657407	-0.0144853	0.0117575
1,2,4,11	-0.00291168	0.00307528	0.343744	-0.0160331	0.0102097
1,2,4,12	-0.00241867	0.00307528	0.431584	-0.0155401	0.0107027
1,2,4,13	-0.000425521	0.00307528	0.88995	-0.0135469	0.0126959
1,2,4,14	0.00147233	0.00307528	0.63211	-0.0116491	0.0145937
1,2,4,15	-0.000918836	0.00307528	0.765108	-0.0140402	0.0122026
1,2,4,16	0.000637135	0.00307528	0.83587	-0.0124843	0.0137585
1,2,5,6	0.0144301	0.00307528	2.70733e-06	0.00130871	0.0275515
1,2,5,7	0.000994049	0.00307528	0.746516	-0.0121273	0.0141154
1,2,5,8	-0.00287062	0.00307528	0.350591	-0.015992	0.0102508
1,2,5,9	-0.00126545	0.00307528	0.680714	-0.0143868	0.0118559
1,2,5,10	0.00550143	0.00307528	0.0736323	-0.00761995	0.0186228
1,2,5,11	-0.00523443	0.00307528	0.0887419	-0.0183558	0.00788696
1,2,5,12	-0.00280816	0.00307528	0.361173	-0.0159295	0.0103132
1,2,5,13	-0.00292668	0.00307528	0.341264	-0.0160481	0.0101947
1,2,5,14	0.00120846	0.00307528	0.694352	-0.0119129	0.0143298
1,2,5,15	-0.00193179	0.00307528	0.529897	-0.0150532	0.0111896
1,2,5,16	0.000258648	0.00307528	0.932973	-0.0128627	0.01338
1,2,6,7	-0.00386856	0.00307528	0.208413	-0.0169899	0.00925283
1,2,6,8	-0.000722136	0.00307528	0.81435	-0.0138435	0.0123993
1,2,6,9	-0.00284023	0.00307528	0.355715	-0.0159616	0.0102812
1,2,6,10	-0.00123639	0.00307528	0.687656	-0.0143578	0.011885
1,2,6,11	-0.00233397	0.00307528	0.447888	-0.0154554	0.0107874
1,2,6,12	0.000282693	0.00307528	0.926759	-0.0128387	0.0134041
1,2,6,13	-0.00137689	0.00307528	0.65435	-0.0144983	0.0117445
1,2,6,14	0.000575001	0.00307528	0.851681	-0.0125464	0.0136964
1,2,6,15	0.00265738	0.00307528	0.387531	-0.010464	0.0157788
1,2,6,16	-0.000605748	0.00307528	0.843849	-0.0137271	0.0125156
1,2,7,8	-0.0102909	0.00307528	0.000819357	-0.0234123	0.00283047
1,2,7,9	-0.00116776	0.00307528	0.704151	-0.0142891	0.0119536
1,2,7,10	-0.00529646	0.00307528	0.0850256	-0.0184178	0.00782492
1,2,7,11	-0.00201898	0.00307528	0.511492	-0.0151404	0.0111024
1,2,7,12	0.00201327	0.00307528	0.512689	-0.0111081	0.0151347
1,2,7,13	-0.00370415	0.00307528	0.228404	-0.0168255	0.00941724
1,2,7,14	-0.000866563	0.00307528	0.77811	-0.0139879	0.0122548
1,2,7,15	-0.00284718	0.00307528	0.35454	-0.0159686	0.0102742
1,2,7,16	-0.000865321	0.00307528	0.77842	-0.0139867	0.0122561
1,2,8,9	0.00345432	0.00307528	0.261334	-0.00966706	0.0165757
1,2,8,10	-0.000708965	0.00307528	0.817675	-0.0138304	0.0124124
1,2,8,11	-0.0088245	0.00307528	0.00411265	-0.0219459	0.00429689
1,2,8,12	-0.00475219	0.00307528	0.122282	-0.0178736	0.00836919
1,2,8,13	0.000852497	0.00307528	0.78162	-0.0122689	0.0139739
1,2,8,14	-0.00181683	0.00307528	0.554667	-0.0149382	0.0113046
1,2,8,15	0.00439784	0.00307528	0.152704	-0.00872354	0.0175192
1,2,8,16	-0.00349327	0.00307528	0.255995	-0.0166147	0.00962812
1,2,9,10	-0.000753797	0.00307528	0.806368	-0.0138752	0.0123676
1,2,9,11	-0.00555929	0.00307528	0.0706527	-0.0186807	0.0075621
1,2,9,12	0.000922958	0.00307528	0.764085	-0.0121984	0.0140443
1,2,9,13	0.000606957	0.00307528	0.843541	-0.0125144	0.0137283
1,2,9,14	-0.00176398	0.00307528	0.56624	-0.0148854	0.0113574
1,2,9,15	-0.00221852	0.00307528	0.470664	-0.0153399	0.0109029
1,2,9,16	0.00102012	0.00307528	0.740104	-0.0121013	0.0141415
1,2,10,11	-0.001173	0.00307528	0.702887	-0.0142944	0.0119484
1,2,10,12	-0.0029892	0.00307528	0.33105	-0.0161106	0.0101322
1,2,10,13	0.00164555	0.00307528	0.592589	-0.0114758	0.0147669
1,2,10,14	0.000948078	0.00307528	0.757863	-0.0121733	0.0140695
1,2,10,15	0.000489137	0.00307528	0.873627	-0.0126322	0.0136105
1,2,10,16	-0.00284112	0.00307528	0.355564	-0.0159625	0.0102803
1,2,11,12	-0.00522848	0.00307528	0.0891049	-0.0183499	0.0078929
1,2,11,13	-0.000952211	0.00307528	0.75684	-0.0140736	0.0121692
1,2,11,14	0.00390812	0.00307528	0.203799	-0.00921327	0.0170295
1,2,11,15	-8.15605e-05	0.00307528	0.978842	-0.0132029	0.0130398
1,2,11,16	-0.00295432	0.00307528	0.336723	-0.0160757	0.0101671
1,2,12,13	-0.00262786	0.00307528	0.392826	-0.0157492	0.0104935
1,2,12,14	-0.00348774	0.00307528	0.256748	-0.0166091	0.00963364
1,2,12,15	-0.0020455	0.00307528	0.505962	-0.0151669	0.0110759
1,2,12,16	0.00306782	0.00307528	0.318489	-0.0100536	0.0161892
1,2,13,14	0.000614287	0.00307528	0.841677	-0.0125071	0.0137357
1,2,13,15	0.00428336	0.00307528	0.163674	-0.00883802	0.0174047
1,2,13,16	0.000749991	0.00307528	0.807327	-0.0123714	0.0138714
1,2,14,15	-7.21176e-06	0.00307528	0.998129	-0.0131286	0.0131142
1,2,14,16	-0.00169992	0.00307528	0.580423	-0.0148213	0.0114215
1,2,15,16	-0.00399955	0.00307528	0.193417	-0.0171209	0.00912183
1,3,4,5	0.00240721	0.00307528	0.433771	-0.0107142	0.0155286
1,3,4,6	-0.00972293	0.00307528	0.00156957	-0.0228443	0.00339845
1,3,4,7	-0.00172503	0.00307528	0.574844	-0.0148464	0.0113964
1,3,4,8	-0.00724379	0.00307528	0.0185014	-0.0203652	0.0058776
1,3,4,9	-0.000919013	0.00307528	0.765064	-0.0140404	0.0122024
1,3,4,10	-0.00750358	0.00307528	0.0146913	-0.020625	0.0056178
1,3,4,11	0.00253932	0.00307528	0.408967	-0.0105821	0.0156607
1,3,4,12	-0.00100615	0.00307528	0.743539	-0.0141275	0.0121152
1,3,4,13	0.000567776	0.00307528	0.853523	-0.0125536	0.0136892
1,3,4,14	-0.00110923	0.00307528	0.718331	-0.0142306	0.0120122
1,3,4,15	-0.0022643	0.00307528	0.461556	-0.0153857	0.0108571
1,3,4,16	-0.00569953	0.00307528	0.0638386	-0.0188209	0.00742185
1,3,5,6	-0.00378133	0.00307528	0.218856	-0.0169027	0.00934006
1,3,5,7	-0.00415628	0.00307528	0.176536	-0.0172777	0.00896511
1,3,5,8	-0.00268347	0.00307528	0.382887	-0.0158049	0.0104379
1,3,5,9	-0.00566817	0.00307528	0.0653135	-0.0187896	0.00745322
1,3,5,10	-0.00334311	0.00307528	0.277001	-0.0164645	0.00977828
1,3,5,11	0.000921317	0.00307528	0.764492	-0.0122001	0.0140427
1,3,5,12	-0.0014827	0.00307528	0.629713	-0.0146041	0.0116387
1,3,5,13	-0.000872066	0.00307528	0.776739	-0.0139935	0.0122493
1,3,5,14	0.00142108	0.00307528	0.644012	-0.0117003	0.0145425
1,3,5,15	-0.000131007	0.00307528	0.96602	-0.0132524	0.0129904
1,3,5,16	-0.00164088	0.00307528	0.593641	-0.0147623	0.0114805
1,3,6,7	-0.000348402	0.00307528	0.9098	-0.0134698	0.012773
1,3,6,8	-0.000426718	0.00307528	0.889642	-0.0135481	0.0126947
1,3,6,9	0.00456012	0.00307528	0.138124	-0.00856127	0.0176815
1,3,6,10	-0.00245867	0.00307528	0.424007	-0.0155801	0.0106627
1,3,6,11	-0.00193083	0.00307528	0.5301	-0.0150522	0.0111906
1,3,6,12	0.000573379	0.00307528	0.852094	-0.012548	0.0136948
1,3,6,13	0.00338529	0.00307528	0.270984	-0.00973609	0.0165067
1,3,6,14	-0.00123798	0.00307528	0.687275	-0.0143594	0.0118834
1,3,6,15	-0.00147892	0.00307528	0.630586	-0.0146003	0.0116425
1,3,6,16	-0.000305913	0.00307528	0.920762	-0.0134273	0.0128155
1,3,7,8	0.00102107	0.00307528	0.739872	-0.0121003	0.0141425
1,3,7,9	0.00125038	0.00307528	0.684311	-0.011871	0.0143718
1,3,7,10	0.0023894	0.00307528	0.437179	-0.010732	0.0155108
1,3,7,11	-0.0013277	0.00307528	0.665936	-0.0144491	0.0117937
1,3,7,12	-0.00237039	0.00307528	0.440835	-0.0154918	0.010751
1,3,7,13	0.000453179	0.00307528	0.882847	-0.0126682	0.0135746
1,3,7,14	0.000690126	0.00307528	0.822438	-0.0124313	0.0138115
1,3,7,15	-0.00181614	0.00307528	0.554816	-0.0149375	0.0113052
1,3,7,16	0.00113924	0.00307528	0.711047	-0.0119821	0.0142606
1,3,8,9	0.000713423	0.00307528	0.816549	-0.012408	0.0138348
1,3,8,10	0.00113069	0.00307528	0.713121	-0.0119907	0.0142521
1,3,8,11	0.00345508	0.00307528	0.261229	-0.00966631	0.0165765
1,3,8,12	0.00582362	0.00307528	0.0582712	-0.00729777	0.018945
1,3,8,13	-0.00233351	0.00307528	0.447977	-0.0154549	0.0107879
1,3,8,14	-0.00160116	0.00307528	0.60261	-0.0147225	0.0115202
1,3,8,15	0.00112905	0.00307528	0.713517	-0.0119923	0.0142504
1,3,8,16	0.00543557	0.00307528	0.077149	-0.00768582	0.018557
1,3,9,10	-0.00292493	0.00307528	0.341552	-0.0160463	0.0101965
1,3,9,11	0.00278554	0.00307528	0.365054	-0.0103358	0.0159069
1,3,9,12	0.00218081	0.00307528	0.47824	-0.0109406	0.0153022
1,3,9,13	-0.000854364	0.00307528	0.781154	-0.0139758	0.012267
1,3,9,14	-0.000598926	0.00307528	0.845585	-0.0137203	0.0125225
1,3,9,15	-0.000590054	0.00307528	0.847845	-0.0137114	0.0125313
1,3,9,16	0.000799801	0.00307528	0.794807	-0.0123216	0.0139212
1,3,10,11	0.00133964	0.00307528	0.663117	-0.0117817	0.014461
1,3,10,12	0.00453344	0.00307528	0.140445	-0.00858795	0.0176548
1,3,10,13	0.00398334	0.00307528	0.19523	-0.00913805	0.0171047
1,3,10,14	-0.00184038	0.00307528	0.549547	-0.0149618	0.011281
1,3,10,15	0.0031134	0.00307528	0.311353	-0.010008	0.0162348
1,3,10,16	-0.00227875	0.00307528	0.458702	-0.0154001	0.0108426
1,3,11,12	0.00461538	0.00307528	0.133412	-0.008506	0.0177368
1,3,11,13	-0.000175052	0.00307528	0.954607	-0.0132964	0.0129463
1,3,11,14	-0.00369555	0.00307528	0.229486	-0.0168169	0.00942584
1,3,11,15	-5.61365e-05	0.00307528	0.985436	-0.0131775	0.0130653
1,3,11,16	-0.000227346	0.00307528	0.941069	-0.0133487	0.012894
1,3,12,13	0.000291688	0.00307528	0.924435	-0.0128297	0.0134131
1,3,12,14	-0.00207057	0.00307528	0.500762	-0.015192	0.0110508
1,3,12,15	0.000103606	0.00307528	0.973124	-0.0130178	0.013225
1,3,12,16	0.00319513	0.00307528	0.298822	-0.00992626	0.0163165
1,3,13,14	-0.000158262	0.00307528	0.958957	-0.0132796	0.0129631
1,3,13,15	-0.000863352	0.00307528	0.778911	-0.0139847	0.012258
1,3,13,16	0.00166857	0.00307528	0.587424	-0.0114528	0.01479
1,3,14,15	-0.000819294	0.00307528	0.789922	-0.0139407	0.0123021
1,3,14,16	-0.00115192	0.00307528	0.707979	-0.0142733	0.0119695
1,3,15,16	-0.00342361	0.00307528	0.265598	-0.016545	0.00969778
1,4,5,6	0.00190698	0.00307528	0.535195	-0.0112144	0.0150284
1,4,5,7	0.000607575	0.00307528	0.843384	-0.0125138	0.013729
1,4,5,8	-0.00245776	0.00307528	0.424179	-0.0155791	0.0106636
1,4,5,9	0.00571322	0.00307528	0.0632036	-0.00740816	0.0188346
1,4,5,10	-0.00175348	0.00307528	0.568553	-0.0148749	0.0113679
1,4,5,11	-0.00302873	0.00307528	0.324696	-0.0161501	0.0100927
1,4,5,12	-0.00175749	0.00307528	0.56767	-0.0148789	0.0113639
1,4,5,13	-0.00174759	0.00307528	0.569853	-0.014869	0.0113738
1,4,5,14	0.00243906	0.00307528	0.427712	-0.0106823	0.0155604
1,4,5,15	0.00191724	0.00307528	0.533	-0.0112041	0.0150386
1,4,5,16	-0.000896365	0.00307528	0.77069	-0.0140178	0.012225
1,4,6,7	0.0028584	0.00307528	0.352646	-0.010263	0.0159798
1,4,6,8	-0.00527719	0.00307528	0.0861663	-0.0183986	0.00784419
1,4,6,9	-0.00246585	0.00307528	0.422655	-0.0155872	0.0106555
1,4,6,10	0.000698783	0.00307528	0.820249	-0.0124226	0.0138202
1,4,6,11	-2.51792e-07	0.00307528	0.999935	-0.0131216	0.0131211
1,4,6,12	0.00280332	0.00307528	0.362001	-0.0103181	0.0159247
1,4,6,13	0.000416193	0.00307528	0.892347	-0.0127052	0.0135376
1,4,6,14	-0.000323369	0.00307528	0.916256	-0.0134448	0.012798
1,4,6,15	0.00453259	0.00307528	0.140519	-0.0085888	0.017654
1,4,6,16	7.8406e-05	0.00307528	0.97966	-0.013043	0.0131998
1,4,7,8	-0.00408265	0.00307528	0.184325	-0.017204	0.00903873
1,4,7,9	0.00396748	0.00307528	0.197014	-0.00915391	0.0170889
1,4,7,10	0.00591368	0.00307528	0.054488	-0.00720771	0.0190351
1,4,7,11	0.000772993	0.00307528	0.801539	-0.0123484	0.0138944
1,4,7,12	-0.00364439	0.00307528	0.235998	-0.0167658	0.00947699
1,4,7,13	-0.00414662	0.00307528	0.177544	-0.017268	0.00897477
1,4,7,14	0.00191204	0.00307528	0.534111	-0.0112093	0.0150334
1,4,7,15	0.00255077	0.00307528	0.406857	-0.0105706	0.0156722
1,4,7,16	-0.00206767	0.00307528	0.501363	-0.0151891	0.0110537
1,4,8,9	-0.00422285	0.00307528	0.169708	-0.0173442	0.00889854
1,4,8,10	0.00227977	0.00307528	0.458502	-0.0108416	0.0154012
1,4,8,11	-0.00610151	0.00307528	0.0472546	-0.0192229	0.00701988
1,4,8,12	-0.00482411	0.00307528	0.116729	-0.0179455	0.00829728
1,4,8,13	0.000862092	0.00307528	0.779226	-0.0122593	0.0139835
1,4,8,14	0.0021461	0.00307528	0.485271	-0.0109753	0.0152675
1,4,8,15	-0.00196066	0.00307528	0.523766	-0.015082	0.0111607
1,4,8,16	0.00118655	0.00307528	0.699621	-0.0119348	0.0143079
1,4,9,10	-0.00010163	0.00307528	0.973637	-0.013223	0.0130198
1,4,9,11	0.00223996	0.00307528	0.466386	-0.0108814	0.0153613
1,4,9,12	0.005064	0.00307528	0.0996289	-0.00805739	0.0181854
1,4,9,13	0.00237077	0.00307528	0.440762	-0.0107506	0.0154922
1,4,9,14	-0.000676577	0.00307528	0.825868	-0.013798	0.0124448
1,4,9,15	-0.00171694	0.00307528	0.576638	-0.0148383	0.0114044
1,4,9,16	-0.000849738	0.00307528	0.782309	-0.0139711	0.0122716
1,4,10,11	-0.00861837	0.00307528	0.00507287	-0.0217398	0.00450301
1,4,10,12	-0.000325247	0.00307528	0.915772	-0.0134466	0.0127961
1,4,10,13	0.000127136	0.00307528	0.967024	-0.0129943	0.0132485
1,4,10,14	-0.000557999	0.00307528	0.856018	-0.0136794	0.0125634
1,4,10,15	-0.00628205	0.00307528	0.0410805	-0.0194034	0.00683933
1,4,10,16	-0.000891671	0.00307528	0.771857	-0.0140131	0.0122297
1,4,11,12	-0.00116337	0.00307528	0.705211	-0.0142848	0.011958
1,4,11,13	-0.00186976	0.00307528	0.543191	-0.0149912	0.0112516
1,4,11,14	0.00010511	0.00307528	0.972735	-0.0130163	0.0132265
1,4,11,15	0.000480122	0.00307528	0.875937	-0.0126413	0.0136015
1,4,11,16	-0.00168446	0.00307528	0.58387	-0.0148058	0.0114369
1,4,12,13	-0.00128361	0.00307528	0.67639	-0.014405	0.0118378
1,4,12,14	0.00160245	0.00307528	0.602317	-0.0115189	0.0147238
1,4,12,15	-0.000613259	0.00307528	0.841938	-0.0137346	0.0125081
1,4,12,16	0.00425912	0.00307528	0.166072	-0.00886227	0.0173805
1,4,13,14	-0.00293756	0.00307528	0.339472	-0.0160589	0.0101838
1,4,13,15	0.000382478	0.00307528	0.901021	-0.0127389	0.0135039
1,4,13,16	-0.000206324	0.00307528	0.946509	-0.0133277	0.0129151
1,4,14,15	0.00194422	0.00307528	0.527253	-0.0111772	0.0150656
1,4,14,16	-0.00196154	0.00307528	0.523579	-0.0150829	0.0111598
1,4,15,16	0.00167628	0.00307528	0.5857	-0.0114451	0.0147977
1,5,6,7	0.00326525	0.00307528	0.288342	-0.00985613	0.0163866
1,5,6,8	0.00568241	0.00307528	0.0646404	-0.00743898	0.0188038
1,5,6,9	0.00303999	0.00307528	0.322899	-0.0100814	0.0161614
1,5,6,10	0.0054116	0.00307528	0.0784619	-0.00770979	0.018533
1,5,6,11	0.00148328	0.00307528	0.629579	-0.0116381	0.0146047
1,5,6,12	-0.00265662	0.00307528	0.387667	-0.015778	0.0104648
1,5,6,13	0.000444549	0.00307528	0.885062	-0.0126768	0.0135659
1,5,6,14	0.000225715	0.00307528	0.941491	-0.0128957	0.0133471
1,5,6,15	-0.0044678	0.00307528	0.146281	-0.0175892	0.00865359
1,5,6,16	0.000503424	0.00307528	0.869968	-0.012618	0.0136248
1,5,7,8	0.00503231	0.00307528	0.101766	-0.00808907	0.0181537
1,5,7,9	-0.00033757	0.00307528	0.912593	-0.013459	0.0127838
1,5,7,10	0.00661474	0.00307528	0.0314849	-0.00650665	0.0197361
1,5,7,11	-0.000974242	0.00307528	0.751398	-0.0140956	0.0121471
1,5,7,12	0.00075674	0.00307528	0.805627	-0.0123646	0.0138781
1,5,7,13	-0.00404852	0.00307528	0.188021	-0.0171699	0.00907287
1,5,7,14	-0.000359645	0.00307528	0.906902	-0.013481	0.0127617
1,5,7,15	-0.00079125	0.00307528	0.796953	-0.0139126	0.0123301
1,5,7,16	-0.0035767	0.00307528	0.244815	-0.0166981	0.00954469
1,5,8,9	-0.00277192	0.00307528	0.367403	-0.0158933	0.0103495
1,5,8,10	-0.00173579	0.00307528	0.572461	-0.0148572	0.0113856
1,5,8,11	0.000429084	0.00307528	0.889034	-0.0126923	0.0135505
1,5,8,12	-0.000278139	0.00307528	0.927935	-0.0133995	0.0128432
1,5,8,13	0.000189298	0.00307528	0.950918	-0.0129321	0.0133107
1,5,8,14	-0.00011126	0.00307528	0.97114	-0.0132326	0.0130101
1,5,8,15	0.000482818	0.00307528	0.875246	-0.0126386	0.0136042
1,5,8,16	-0.0011017	0.00307528	0.720162	-0.0142231	0.0120197
1,5,9,10	0.00252952	0.00307528	0.410777	-0.0105919	0.0156509
1,5,9,11	-0.000450699	0.00307528	0.883483	-0.0135721	0.0126707
1,5,9,12	0.00139865	0.00307528	0.649251	-0.0117227	0.01452
1,5,9,13	-0.00177715	0.00307528	0.563346	-0.0148985	0.0113442
1,5,9,14	-0.000627569	0.00307528	0.8383	-0.013749	0.0124938
1,5,9,15	0.00264011	0.00307528	0.390623	-0.0104813	0.0157615
1,5,9,16	0.00176068	0.00307528	0.566968	-0.0113607	0.0148821
1,5,10,11	-0.00273406	0.00307528	0.373982	-0.0158554	0.0103873
1,5,10,12	0.00389559	0.00307528	0.205252	-0.0092258	0.017017
1,5,10,13	0.00300078	0.00307528	0.329179	-0.0101206	0.0161222
1,5,10,14	0.00043613	0.00307528	0.887224	-0.0126853	0.0135575
1,5,10,15	-0.00102569	0.00307528	0.738738	-0.0141471	0.0120957
1,5,10,16	0.000514777	0.00307528	0.867062	-0.0126066	0.0136362
1,5,11,12	-0.00200692	0.00307528	0.514019	-0.0151283	0.0111145
1,5,11,13	-0.000863651	0.00307528	0.778837	-0.013985	0.0122577
1,5,11,14	-0.00248163	0.00307528	0.419693	-0.015603	0.0106398
1,5,11,15	0.00128631	0.00307528	0.675747	-0.0118351	0.0144077
1,5,11,16	0.00365025	0.00307528	0.235246	-0.00947114	0.0167716
1,5,12,13	0.0029852	0.00307528	0.331698	-0.0101362	0.0161066
1,5,12,14	-0.00187123	0.00307528	0.542875	-0.0149926	0.0112502
1,5,12,15	0.0020311	0.00307528	0.508961	-0.0110903	0.0151525
1,5,12,16	0.00547092	0.00307528	0.0752447	-0.00765047	0.0185923
1,5,13,14	0.00534298	0.00307528	0.0823219	-0.0077784	0.0184644
1,5,13,15	-7.96095e-05	0.00307528	0.979348	-0.013201	0.0130418
1,5,13,16	0.000958129	0.00307528	0.755377	-0.0121633	0.0140795
1,5,14,15	-0.00100001	0.00307528	0.745049	-0.0141214	0.0121214
1,5,14,16	-0.00426412	0.00307528	0.165575	-0.0173855	0.00885727
1,5,15,16	-0.00112551	0.00307528	0.714377	-0.0142469	0.0119959
1,6,7,8	-0.00113847	0.00307528	0.711235	-0.0142599	0.0119829
1,6,7,9	0.00393599	0.00307528	0.200592	-0.0091854	0.0170574
1,6,7,10	-0.00146483	0.00307528	0.633844	-0.0145862	0.0116566
1,6,7,11	-0.00218097	0.00307528	0.478207	-0.0153024	0.0109404
1,6,7,12	-0.00186405	0.00307528	0.544424	-0.0149854	0.0112573
1,6,7,13	-0.0032925	0.00307528	0.284338	-0.0164139	0.00982889
1,6,7,14	0.000893183	0.00307528	0.771481	-0.0122282	0.0140146
1,6,7,15	0.000128437	0.00307528	0.966687	-0.012993	0.0132498
1,6,7,16	0.00160259	0.00307528	0.602284	-0.0115188	0.014724
1,6,8,9	-0.00271364	0.00307528	0.377562	-0.015835	0.0104077
1,6,8,10	-0.00436539	0.00307528	0.155756	-0.0174868	0.008756
1,6,8,11	0.00149529	0.00307528	0.626807	-0.0116261	0.0146167
1,6,8,12	-0.00403614	0.00307528	0.189375	-0.0171575	0.00908525
1,6,8,13	-0.00036542	0.00307528	0.905414	-0.0134868	0.012756
1,6,8,14	-0.00109337	0.00307528	0.72219	-0.0142148	0.012028
1,6,8,15	0.00227743	0.00307528	0.458964	-0.010844	0.0153988
1,6,8,16	0.00171731	0.00307528	0.576557	-0.0114041	0.0148387
1,6,9,10	-0.000689632	0.00307528	0.822563	-0.013811	0.0124318
1,6,9,11	-0.000268513	0.00307528	0.930423	-0.0133899	0.0128529
1,6,9,12	-0.00210812	0.00307528	0.493028	-0.0152295	0.0110133
1,6,9,13	-0.00160491	0.00307528	0.601761	-0.0147263	0.0115165
1,6,9,14	0.00131027	0.00307528	0.670062	-0.0118111	0.0144317
1,6,9,15	-0.000923122	0.00307528	0.764045	-0.0140445	0.0121983
1,6,9,16	3.58201e-05	0.00307528	0.990707	-0.0130856	0.0131572
1,6,10,11	0.000634514	0.00307528	0.836536	-0.0124869	0.0137559
1,6,10,12	-0.004125	0.00307528	0.179814	-0.0172464	0.00899638
1,6,10,13	-0.00143939	0.00307528	0.639748	-0.0145608	0.011682
1,6,10,14	0.00393153	0.00307528	0.201102	-0.00918986	0.0170529
1,6,10,15	-0.00178856	0.00307528	0.560844	-0.0149099	0.0113328
1,6,10,16	-0.00401972	0.00307528	0.191182	-0.0171411	0.00910167
1,6,11,12	0.000240678	0.00307528	0.93762	-0.0128807	0.0133621
1,6,11,13	0.00332903	0.00307528	0.279028	-0.00979235	0.0164504
1,6,11,14	-0.00373212	0.00307528	0.22491	-0.0168535	0.00938927
1,6,11,15	-0.00115203	0.00307528	0.707952	-0.0142734	0.0119694
1,6,11,16	-0.000136989	0.00307528	0.96447	-0.0132584	0.0129844
1,6,12,13	0.00105393	0.00307528	0.731819	-0.0120675	0.0141753
1,6,12,14	-0.00113756	0.00307528	0.711456	-0.0142589	0.0119838
1,6,12,15	-0.000943509	0.00307528	0.758993	-0.0140649	0.0121779
1,6,12,16	2.18439e-05	0.00307528	0.994333	-0.0130995	0.0131432
1,6,13,14	0.00192455	0.00307528	0.531439	-0.0111968	0.0150459
1,6,13,15	-0.00378902	0.00307528	0.21792	-0.0169104	0.00933237
1,6,13,16	0.0013247	0.00307528	0.666646	-0.0117967	0.0144461
1,6,14,15	0.00304277	0.00307528	0.322457	-0.0100786	0.0161642
1,6,14,16	0.000190289	0.00307528	0.950661	-0.0129311	0.0133117
1,6,15,16	-0.00380868	0.00307528	0.215541	-0.0169301	0.0093127
1,7,8,9	0.00517676	0.00307528	0.0923132	-0.00794463	0.0182981
1,7,8,10	-0.00132395	0.00307528	0.666823	-0.0144453	0.0117974
1,7,8,11	-0.00273075	0.00307528	0.374561	-0.0158521	0.0103906
1,7,8,12	-0.00107157	0.00307528	0.727505	-0.014193	0.0120498
1,7,8,13	-0.00110148	0.00307528	0.720216	-0.0142229	0.0120199
1,7,8,14	0.000169067	0.00307528	0.956158	-0.0129523	0.0132905
1,7,8,15	-0.00264115	0.00307528	0.390437	-0.0157625	0.0104802
1,7,8,16	-0.00342479	0.00307528	0.265433	-0.0165462	0.0096966
1,7,9,10	-0.00474829	0.00307528	0.122588	-0.0178697	0.00837309
1,7,9,11	-0.00342769	0.00307528	0.265029	-0.0165491	0.0096937
1,7,9,12	-0.001222	0.00307528	0.691102	-0.0143434	0.0118994
1,7,9,13	0.000132479	0.00307528	0.965639	-0.0129889	0.0132539
1,7,9,14	-0.00052262	0.00307528	0.865056	-0.013644	0.0125988
1,7,9,15	0.00251044	0.00307528	0.414315	-0.0106109	0.0156318
1,7,9,16	-0.00186772	0.00307528	0.543632	-0.0149891	0.0112537
1,7,10,11	-0.00553007	0.00307528	0.0721451	-0.0186515	0.00759132
1,7,10,12	0.000899926	0.00307528	0.769804	-0.0122215	0.0140213
1,7,10,13	0.00231232	0.00307528	0.45211	-0.0108091	0.0154337
1,7,10,14	-0.00300963	0.00307528	0.327756	-0.016131	0.0101118
1,7,10,15	0.00165232	0.00307528	0.591069	-0.0114691	0.0147737
1,7,10,16	-0.00288057	0.00307528	0.348925	-0.016002	0.0102408
1,7,11,12	0.00333035	0.00307528	0.278839	-0.00979104	0.0164517
1,7,11,13	0.000469945	0.00307528	0.878546	-0.0126514	0.0135913
1,7,11,14	-0.000343584	0.00307528	0.911042	-0.013465	0.0127778
1,7,11,15	0.000411033	0.00307528	0.893674	-0.0127104	0.0135324
1,7,11,16	0.00109174	0.00307528	0.722586	-0.0120296	0.0142131
1,7,12,13	-0.000361722	0.00307528	0.906367	-0.0134831	0.0127597
1,7,12,14	0.00312939	0.00307528	0.308874	-0.009992	0.0162508
1,7,12,15	0.000946533	0.00307528	0.758245	-0.0121749	0.0140679
1,7,12,16	0.00370929	0.00307528	0.227759	-0.0094121	0.0168307
1,7,13,14	0.000155981	0.00307528	0.959548	-0.0129654	0.0132774
1,7,13,15	0.000760787	0.00307528	0.804609	-0.0123606	0.0138822
1,7,13,16	-0.000849446	0.00307528	0.782382	-0.0139708	0.0122719
1,7,14,15	-0.00151111	0.00307528	0.623165	-0.0146325	0.0116103
1,7,14,16	-0.00305696	0.00307528	0.320206	-0.0161783	0.0100644
1,7,15,16	-0.00346251	0.00307528	0.260204	-0.0165839	0.00965887
1,8,9,10	-0.00102791	0.00307528	0.738193	-0.0141493	0.0120935
1,8,9,11	-0.000900988	0.00307528	0.76954	-0.0140224	0.0122204
1,8,9,12	-0.00338515	0.00307528	0.271004	-0.0165065	0.00973623
1,8,9,13	0.00196417	0.00307528	0.523022	-0.0111572	0.0150856
1,8,9,14	0.00344952	0.00307528	0.261997	-0.00967186	0.0165709
1,8,9,15	-0.000801143	0.00307528	0.794471	-0.0139225	0.0123202
1,8,9,16	0.000393779	0.00307528	0.898112	-0.0127276	0.0135152
1,8,10,11	0.00335899	0.00307528	0.274725	-0.00976239	0.0164804
1,8,10,12	-0.000446609	0.00307528	0.884533	-0.013568	0.0126748
1,8,10,13	-0.000601189	0.00307528	0.845009	-0.0137226	0.0125202
1,8,10,14	0.00248795	0.00307528	0.418509	-0.0106334	0.0156093
1,8,10,15	0.000677516	0.00307528	0.82563	-0.0124439	0.0137989
1,8,10,16	0.00066801	0.00307528	0.828038	-0.0124534	0.0137894
1,8,11,12	-0.000653787	0.00307528	0.831644	-0.0137752	0.0124676
1,8,11,13	0.00139663	0.00307528	0.649726	-0.0117248	0.014518
1,8,11,14	0.00404383	0.00307528	0.188533	-0.00907756	0.0171652
1,8,11,15	-0.00487611	0.00307528	0.112839	-0.0179975	0.00824527
1,8,11,16	-0.00256075	0.00307528	0.405024	-0.0156821	0.0105606
1,8,12,13	0.000451867	0.00307528	0.883184	-0.0126695	0.0135733
1,8,12,14	-0.00128991	0.00307528	0.674892	-0.0144113	0.0118315
1,8,12,15	-0.00233132	0.00307528	0.448403	-0.0154527	0.0107901
1,8,12,16	-0.00113676	0.00307528	0.71165	-0.0142581	0.0119846
1,8,13,14	0.000666844	0.00307528	0.828334	-0.0124545	0.0137882
1,8,13,15	-0.000468616	0.00307528	0.878887	-0.01359	0.0126528
1,8,13,16	-0.00186704	0.00307528	0.543779	-0.0149884	0.0112543
1,8,14,15	0.00531144	0.00307528	0.0841472	-0.00780994	0.0184328
1,8,14,16	0.000532909	0.00307528	0.862426	-0.0125885	0.0136543
1,8,15,16	0.00362825	0.00307528	0.23808	-0.00949313	0.0167496
1,9,10,11	-0.00342982	0.00307528	0.264732	-0.0165512	0.00969157
1,9,10,12	0.00357528	0.00307528	0.245001	-0.0095461	0.0166967
1,9,10,13	-0.00285854	0.00307528	0.352623	-0.0159799	0.0102628
1,9,10,14	0.00629382	0.00307528	0.0407032	-0.00682757	0.0194152
1,9,10,15	0.00116193	0.00307528	0.705559	-0.0119595	0.0142833
1,9,10,16	0.00225254	0.00307528	0.463887	-0.0108688	0.0153739
1,9,11,12	-0.0011744	0.00307528	0.702548	-0.0142958	0.011947
1,9,11,13	-0.00243802	0.00307528	0.427909	-0.0155594	0.0106834
1,9,11,14	0.000285494	0.00307528	0.926035	-0.0128359	0.0134069
1,9,11,15	-0.000626065	0.00307528	0.838683	-0.0137475	0.0124953
1,9,11,16	0.00274289	0.00307528	0.372441	-0.0103785	0.0158643
1,9,12,13	0.00189151	0.00307528	0.53851	-0.0112299	0.0150129
1,9,12,14	-0.000242107	0.00307528	0.93725	-0.0133635	0.0128793
1,9,12,15	0.00102283	0.00307528	0.73944	-0.0120986	0.0141442
1,9,12,16	0.000981658	0.00307528	0.749569	-0.0121397	0.014103
1,9,13,14	-0.00449549	0.00307528	0.143797	-0.0176169	0.0086259
1,9,13,15	-0.0017941	0.00307528	0.55963	-0.0149155	0.0113273
1,9,13,16	-0.000390117	0.00307528	0.899055	-0.0135115	0.0127313
1,9,14,15	0.000210127	0.00307528	0.945525	-0.0129113	0.0133315
1,9,14,16	0.00148275	0.00307528	0.629699	-0.0116386	0.0146041
1,9,15,16	0.000117271	0.00307528	0.969581	-0.0130041	0.0132387
1,10,11,12	-2.79728e-05	0.00307528	0.992743	-0.0131494	0.0130934
1,10,11,13	-0.00134413	0.00307528	0.662058	-0.0144655	0.0117773
1,10,11,14	-0.00325046	0.00307528	0.290532	-0.0163718	0.00987093
1,10,11,15	-0.0011529	0.00307528	0.707741	-0.0142743	0.0119685
1,10,11,16	0.00505907	0.00307528	0.0999588	-0.00806231	0.0181805
1,10,12,13	0.00274031	0.00307528	0.372891	-0.0103811	0.0158617
1,10,12,14	0.00281631	0.00307528	0.359781	-0.0103051	0.0159377
1,10,12,15	-0.000459894	0.00307528	0.881124	-0.0135813	0.0126615
1,10,12,16	0.000175327	0.00307528	0.954536	-0.0129461	0.0132967
1,10,13,14	0.00173509	0.00307528	0.572617	-0.0113863	0.0148565
1,10,13,15	-0.00420677	0.00307528	0.171339	-0.0173282	0.00891462
1,10,13,16	-0.000683205	0.00307528	0.82419	-0.0138046	0.0124382
1,10,14,15	-0.00271769	0.00307528	0.376851	-0.0158391	0.0104037
1,10,14,16	0.00410028	0.00307528	0.182437	-0.0090211	0.0172217
1,10,15,16	0.00518724	0.00307528	0.0916555	-0.00793414	0.0183086
1,11,12,13	0.00149777	0.00307528	0.626235	-0.0116236	0.0146192
1,11,12,14	-0.00115394	0.00307528	0.70749	-0.0142753	0.0119674
1,11,12,15	-0.00240475	0.00307528	0.43424	-0.0155261	0.0107166
1,11,12,16	-0.00272372	0.00307528	0.375793	-0.0158451	0.0103977
1,11,13,14	-0.00029109	0.00307528	0.924589	-0.0134125	0.0128303
1,11,13,15	-0.00102601	0.00307528	0.73866	-0.0141474	0.0120954
1,11,13,16	0.000622019	0.00307528	0.839711	-0.0124994	0.0137434
1,11,14,15	-0.000490107	0.00307528	0.873378	-0.0136115	0.0126313
1,11,14,16	0.00112482	0.00307528	0.714545	-0.0119966	0.0142462
1,11,15,16	0.00336318	0.00307528	0.274127	-0.00975821	0.0164846
1,12,13,14	-0.00116094	0.00307528	0.705799	-0.0142823	0.0119604
1,12,13,15	-0.0011031	0.00307528	0.719821	-0.0142245	0.0120183
1,12,13,16	0.000916694	0.00307528	0.765639	-0.0122047	0.0140381
1,12,14,15	-0.00143691	0.00307528	0.640325	-0.0145583	0.0116845
1,12,14,16	-0.00133057	0.00307528	0.665259	-0.014452	0.0117908
1,12,15,16	0.00384634	0.00307528	0.211039	-0.00927505	0.0169677
1,13,14,15	-0.0032828	0.00307528	0.285759	-0.0164042	0.00983859
1,13,14,16	0.00135027	0.00307528	0.66061	-0.0117711	0.0144717
1,13,15,16	0.00367127	0.00307528	0.232561	-0.00945011	0.0167927
1,14,15,16	0.00138863	0.00307528	0.651597	-0.0117328	0.01451
2,3,4,5	-0.0115183	0.00307528	0.000180239	-0.0246397	0.00160311
2,3,4,6	0.0046527	0.00307528	0.130301	-0.00846869	0.0177741
2,3,4,7	0.0079567	0.00307528	0.00967513	-0.00516469	0.0210781
2,3,4,8	-0.00269203	0.00307528	0.381371	-0.0158134	0.0104294
2,3,4,9	0.003684	0.00307528	0.230946	-0.00943739	0.0168054
2,3,4,10	0.00065325	0.00307528	0.83178	-0.0124681	0.0137746
2,3,4,11	0.00312981	0.00307528	0.30881	-0.00999158	0.0162512
2,3,4,12	0.00400185	0.00307528	0.193161	-0.00911953	0.0171232
2,3,4,13	0.000605504	0.00307528	0.843911	-0.0125159	0.0137269
2,3,4,14	-0.00290839	0.00307528	0.344289	-0.0160298	0.010213
2,3,4,15	-0.000616048	0.00307528	0.841229	-0.0137374	0.0125053
2,3,4,16	0.00453413	0.00307528	0.140385	-0.00858726	0.0176555
2,3,5,6	-0.00217443	0.00307528	0.479527	-0.0152958	0.010947
2,3,5,7	0.0259947	0.00307528	2.90411e-17	0.0128733	0.0391161
2,3,5,8	0.0188232	0.00307528	9.36424e-10	0.00570185	0.0319446
2,3,5,9	0.00459582	0.00307528	0.135066	-0.00852557	0.0177172
2,3,5,10	0.00894141	0.00307528	0.00364446	-0.00417998	0.0220628
2,3,5,11	0.0229179	0.00307528	9.29013e-14	0.0097965	0.0360393
2,3,5,12	0.011153	0.00307528	0.000287335	-0.00196838	0.0242744
2,3,5,13	-0.00217866	0.00307528	0.478672	-0.0153	0.0109427
2,3,5,14	0.00148813	0.00307528	0.628458	-0.0116333	0.0146095
2,3,5,15	0.00537337	0.00307528	0.080594	-0.00774802	0.0184948
2,3,5,16	0.0136623	0.00307528	8.90196e-06	0.000540926	0.0267837
2,3,6,7	-0.00494266	0.00307528	0.10801	-0.0180641	0.00817872
2,3,6,8	-0.00593655	0.00307528	0.0535605	-0.0190579	0.00718483
2,3,6,9	-0.00248693	0.00307528	0.418699	-0.0156083	0.0106345
2,3,6,10	-0.000653055	0.00307528	0.83183	-0.0137744	0.0124683
2,3,6,11	-0.00275967	0.00307528	0.369524	-0.0158811	0.0103617
2,3,6,12	0.00106679	0.00307528	0.728674	-0.0120546	0.0141882
2,3,6,13	6.86507e-05	0.00307528	0.98219	-0.0130527	0.01319
2,3,6,14	-0.000960832	0.00307528	0.754709	-0.0140822	0.0121606
2,3,6,15	-0.00167107	0.00307528	0.586865	-0.0147925	0.0114503
2,3,6,16	-0.00332465	0.00307528	0.279661	-0.016446	0.00979673
2,3,7,8	0.0112836	0.00307528	0.000243589	-0.00183782	0.024405
2,3,7,9	-0.00578559	0.00307528	0.0599328	-0.018907	0.0073358
2,3,7,10	0.0253472	0.00307528	1.72249e-16	0.0122258	0.0384685
2,3,7,11	0.00293413	0.00307528	0.340035	-0.0101873	0.0160555
2,3,7,12	-0.00659463	0.00307528	0.0320046	-0.019716	0.00652675
2,3,7,13	0.00469321	0.00307528	0.126988	-0.00842817	0.0178146
2,3,7,14	0.00203724	0.00307528	0.50768	-0.0110841	0.0151586
2,3,7,15	-0.00654203	0.00307528	0.0333994	-0.0196634	0.00657936
2,3,7,16	-0.00295179	0.00307528	0.337138	-0.0160732	0.0101696
2,3,8,9	-0.00587244	0.00307528	0.0561943	-0.0189938	0.00724895
2,3,8,10	0.0063862	0.00307528	0.0378403	-0.00673518	0.0195076
2,3,8,11	-0.00141664	0.00307528	0.645048	-0.014538	0.0117047
2,3,8,12	-0.00201237	0.00307528	0.512875	-0.0151338	0.011109
2,3,8,13	-0.00102729	0.00307528	0.738344	-0.0141487	0.0120941
2,3,8,14	0.0039494	0.00307528	0.199062	-0.00917198	0.0170708
2,3,8,15	0.00296898	0.00307528	0.334332	-0.0101524	0.0160904
2,3,8,16	-0.00166811	0.00307528	0.587527	-0.0147895	0.0114533
2,3,9,10	0.00267671	0.00307528	0.384087	-0.0104447	0.0157981
2,3,9,11	-0.00405235	0.00307528	0.187604	-0.0171737	0.00906904
2,3,9,12	0.00211049	0.00307528	0.492541	-0.0110109	0.0152319
2,3,9,13	-0.000709813	0.00307528	0.817461	-0.0138312	0.0124116
2,3,9,14	-0.000450167	0.00307528	0.88362	-0.0135716	0.0126712
2,3,9,15	-0.00818675	0.00307528	0.00776707	-0.0213081	0.00493463
2,3,9,16	-0.00246222	0.00307528	0.423337	-0.0155836	0.0106592
2,3,10,11	-0.00689919	0.00307528	0.0248723	-0.0200206	0.0062222
2,3,10,12	0.00737979	0.00307528	0.0164109	-0.0057416	0.0205012
2,3,10,13	-0.00510174	0.00307528	0.0971303	-0.0182231	0.00801964
2,3,10,14	-0.00305748	0.00307528	0.320124	-0.0161789	0.0100639
2,3,10,15	0.0113812	0.00307528	0.000215057	-0.00174022	0.0245026
2,3,10,16	0.00722777	0.00307528	0.0187623	-0.00589361	0.0203492
2,3,11,12	0.00431898	0.00307528	0.160199	-0.0088024	0.0174404
2,3,11,13	-0.000585668	0.00307528	0.848962	-0.0137071	0.0125357
2,3,11,14	-0.00475448	0.00307528	0.122102	-0.0178759	0.0083669
2,3,11,15	0.012624	0.00307528	4.0484e-05	-0.000497389	0.0257454
2,3,11,16	0.000700468	0.00307528	0.819823	-0.0124209	0.0138219
2,3,12,13	-0.00073101	0.00307528	0.812111	-0.0138524	0.0123904
2,3,12,14	-0.00387366	0.00307528	0.207814	-0.016995	0.00924772
2,3,12,15	-0.00757232	0.00307528	0.0138068	-0.0206937	0.00554906
2,3,12,16	-0.000983919	0.00307528	0.749011	-0.0141053	0.0121375
2,3,13,14	0.00100654	0.00307528	0.743441	-0.0121148	0.0141279
2,3,13,15	0.00270338	0.00307528	0.379368	-0.010418	0.0158248
2,3,13,16	0.00553297	0.00307528	0.0719955	-0.00758841	0.0186544
2,3,14,15	-0.000443816	0.00307528	0.88525	-0.0135652	0.0126776
2,3,14,16	-0.00343919	0.00307528	0.263429	-0.0165606	0.0096822
2,3,15,16	0.000192736	0.00307528	0.950027	-0.0129286	0.0133141
2,4,5,6	-0.0142484	0.00307528	3.60761e-06	-0.0273698	-0.00112703
2,4,5,7	0.00173231	0.00307528	0.573231	-0.0113891	0.0148537
2,4,5,8	-0.0117642	0.00307528	0.000130687	-0.0248856	0.00135722
2,4,5,9	0.00529775	0.00307528	0.08495	-0.00782364	0.0184191
2,4,5,10	0.00321374	0.00307528	0.296016	-0.00990764	0.0163351
2,4,5,11	0.00262545	0.00307528	0.393259	-0.0104959	0.0157468
2,4,5,12	-0.00712732	0.00307528	0.0204734	-0.0202487	0.00599407
2,4,5,13	0.00182292	0.00307528	0.553341	-0.0112985	0.0149443
2,4,5,14	0.000544764	0.00307528	0.859397	-0.0125766	0.0136662
2,4,5,15	-0.00664959	0.00307528	0.0306011	-0.019771	0.0064718
2,4,5,16	-0.000631254	0.00307528	0.837364	-0.0137526	0.0124901
2,4,6,7	0.00801069	0.00307528	0.00919322	-0.0051107	0.0211321
2,4,6,8	-0.000203428	0.00307528	0.947259	-0.0133248	0.012918
2,4,6,9	-0.00327301	0.00307528	0.287199	-0.0163944	0.00984838
2,4,6,10	-0.00169173	0.00307528	0.58225	-0.0148131	0.0114297
2,4,6,11	-0.00075559	0.00307528	0.805917	-0.013877	0.0123658
2,4,6,12	0.0076533	0.00307528	0.0128255	-0.00546809	0.0207747
2,4,6,13	-0.000325779	0.00307528	0.915634	-0.0134472	0.0127956
2,4,6,14	0.0028429	0.00307528	0.355263	-0.0102785	0.0159643
2,4,6,15	7.42274e-06	0.00307528	0.998074	-0.013114	0.0131288
2,4,6,16	0.00377489	0.00307528	0.219642	-0.0093465	0.0168963
2,4,7,8	0.00515343	0.00307528	0.0937906	-0.00796796	0.0182748
2,4,7,9	9.88265e-05	0.00307528	0.974364	-0.0130226	0.0132202
2,4,7,10	-0.00314277	0.00307528	0.306811	-0.0162642	0.00997862
2,4,7,11	0.00247461	0.00307528	0.42101	-0.0106468	0.015596
2,4,7,12	0.000272852	0.00307528	0.929301	-0.0128485	0.0133942
2,4,7,13	0.000632388	0.00307528	0.837076	-0.012489	0.0137538
2,4,7,14	0.00643883	0.00307528	0.0362872	-0.00668255	0.0195602
2,4,7,15	-0.0039981	0.00307528	0.19358	-0.0171195	0.00912329
2,4,7,16	-0.00229775	0.00307528	0.454965	-0.0154191	0.0108236
2,4,8,9	-0.00337485	0.00307528	0.272465	-0.0164962	0.00974653
2,4,8,10	-0.00152964	0.00307528	0.61891	-0.014651	0.0115917
2,4,8,11	0.0195748	0.00307528	1.96378e-10	0.00645337	0.0326961
2,4,8,12	-0.000906212	0.00307528	0.768242	-0.0140276	0.0122152
2,4,8,13	0.000361462	0.00307528	0.906434	-0.0127599	0.0134828
2,4,8,14	0.000784867	0.00307528	0.798555	-0.0123365	0.0139063
2,4,8,15	0.00570213	0.00307528	0.0637176	-0.00741925	0.0188235
2,4,8,16	0.00479275	0.00307528	0.119125	-0.00832864	0.0179141
2,4,9,10	0.00239766	0.00307528	0.435597	-0.0107237	0.015519
2,4,9,11	0.00129204	0.00307528	0.674388	-0.0118294	0.0144134
2,4,9,12	-0.000967382	0.00307528	0.753091	-0.0140888	0.012154
2,4,9,13	-0.00121984	0.00307528	0.691619	-0.0143412	0.0119015
2,4,9,14	0.00343193	0.00307528	0.264438	-0.00968946	0.0165533
2,4,9,15	-0.000317404	0.00307528	0.917796	-0.0134388	0.012804
2,4,9,16	-0.00236537	0.00307528	0.441804	-0.0154868	0.010756
2,4,10,11	0.0144281	0.00307528	2.71602e-06	0.0013067	0.0275495
2,4,10,12	0.00119526	0.00307528	0.697523	-0.0119261	0.0143167
2,4,10,13	-0.00128147	0.00307528	0.676899	-0.0144029	0.0118399
2,4,10,14	-0.0026459	0.00307528	0.389585	-0.0157673	0.0104755
2,4,10,15	0.00207796	0.00307528	0.499234	-0.0110434	0.0151994
2,4,10,16	0.00160623	0.00307528	0.601461	-0.0115152	0.0147276
2,4,11,12	0.000525259	0.00307528	0.864381	-0.0125961	0.0136466
2,4,11,13	-0.00197511	0.00307528	0.520711	-0.0150965	0.0111463
2,4,11,14	0.00190645	0.00307528	0.535308	-0.0112149	0.0150278
2,4,11,15	-0.00118783	0.00307528	0.699312	-0.0143092	0.0119336
2,4,11,16	-0.00543952	0.00307528	0.0769341	-0.0185609	0.00768187
2,4,12,13	0.000427488	0.00307528	0.889444	-0.0126939	0.0135489
2,4,12,14	-0.000486964	0.00307528	0.874183	-0.0136084	0.0126344
2,4,12,15	0.00170118	0.00307528	0.580143	-0.0114202	0.0148226
2,4,12,16	0.0026665	0.00307528	0.385903	-0.0104549	0.0157879
2,4,13,14	0.00141756	0.00307528	0.644834	-0.0117038	0.0145389
2,4,13,15	-0.00307072	0.00307528	0.318033	-0.0161921	0.0100507
2,4,13,16	-0.00147725	0.00307528	0.630971	-0.0145986	0.0116441
2,4,14,15	0.00338418	0.00307528	0.271142	-0.00973721	0.0165056
2,4,14,16	0.00182001	0.00307528	0.553975	-0.0113014	0.0149414
2,4,15,16	0.00257173	0.00307528	0.403013	-0.0105497	0.0156931
2,5,6,7	0.00271488	0.00307528	0.377344	-0.0104065	0.0158363
2,5,6,8	-0.00262784	0.00307528	0.392829	-0.0157492	0.0104935
2,5,6,9	0.0019266	0.00307528	0.531002	-0.0111948	0.015048
2,5,6,10	-0.0012063	0.00307528	0.69487	-0.0143277	0.0119151
2,5,6,11	-0.00057535	0.00307528	0.851592	-0.0136967	0.012546
2,5,6,12	-0.0018074	0.00307528	0.556724	-0.0149288	0.011314
2,5,6,13	-0.000364225	0.00307528	0.905722	-0.0134856	0.0127572
2,5,6,14	0.00385378	0.00307528	0.210157	-0.00926761	0.0169752
2,5,6,15	-0.000597168	0.00307528	0.846033	-0.0137186	0.0125242
2,5,6,16	-0.00338278	0.00307528	0.27134	-0.0165042	0.0097386
2,5,7,8	0.000899673	0.00307528	0.769867	-0.0122217	0.0140211
2,5,7,9	-0.000162113	0.00307528	0.957959	-0.0132835	0.0129593
2,5,7,10	-0.00149735	0.00307528	0.626332	-0.0146187	0.011624
2,5,7,11	-0.000961139	0.00307528	0.754633	-0.0140825	0.0121602
2,5,7,12	0.00305066	0.00307528	0.321205	-0.0100707	0.016172
2,5,7,13	0.00102257	0.00307528	0.739503	-0.0120988	0.014144
2,5,7,14	0.00202077	0.00307528	0.511118	-0.0111006	0.0151422
2,5,7,15	-0.00148912	0.00307528	0.628229	-0.0146105	0.0116323
2,5,7,16	0.00171493	0.00307528	0.577085	-0.0114065	0.0148363
2,5,8,9	-0.00251752	0.00307528	0.412999	-0.0156389	0.0106039
2,5,8,10	-0.00488518	0.00307528	0.112171	-0.0180066	0.00823621
2,5,8,11	-0.00420077	0.00307528	0.17195	-0.0173222	0.00892062
2,5,8,12	-0.00100556	0.00307528	0.743684	-0.0141269	0.0121158
2,5,8,13	0.00158266	0.00307528	0.606807	-0.0115387	0.014704
2,5,8,14	-0.000717458	0.00307528	0.81553	-0.0138388	0.0124039
2,5,8,15	0.000711476	0.00307528	0.817041	-0.0124099	0.0138329
2,5,8,16	-0.00343458	0.00307528	0.26407	-0.016556	0.00968681
2,5,9,10	-0.00503149	0.00307528	0.101822	-0.0181529	0.0080899
2,5,9,11	-0.00475265	0.00307528	0.122246	-0.017874	0.00836874
2,5,9,12	-0.000990945	0.00307528	0.74728	-0.0141123	0.0121304
2,5,9,13	-0.00269278	0.00307528	0.381239	-0.0158142	0.0104286
2,5,9,14	-0.000571204	0.00307528	0.852649	-0.0136926	0.0125502
2,5,9,15	0.001758	0.00307528	0.567558	-0.0113634	0.0148794
2,5,9,16	0.000243898	0.00307528	0.936787	-0.0128775	0.0133653
2,5,10,11	-0.00503109	0.00307528	0.101849	-0.0181525	0.00809029
2,5,10,12	0.00268898	0.00307528	0.381911	-0.0104324	0.0158104
2,5,10,13	0.00111116	0.00307528	0.717861	-0.0120102	0.0142326
2,5,10,14	0.00256504	0.00307528	0.404237	-0.0105563	0.0156864
2,5,10,15	0.00628942	0.00307528	0.0408439	-0.00683197	0.0194108
2,5,10,16	0.000224801	0.00307528	0.941727	-0.0128966	0.0133462
2,5,11,12	0.00187982	0.00307528	0.541025	-0.0112416	0.0150012
2,5,11,13	0.00165197	0.00307528	0.591147	-0.0114694	0.0147734
2,5,11,14	-0.00047186	0.00307528	0.878055	-0.0135932	0.0126495
2,5,11,15	0.00244808	0.00307528	0.426005	-0.0106733	0.0155695
2,5,11,16	0.000475376	0.00307528	0.877153	-0.012646	0.0135968
2,5,12,13	0.000552962	0.00307528	0.857303	-0.0125684	0.0136743
2,5,12,14	0.00631762	0.00307528	0.0399485	-0.00680376	0.019439
2,5,12,15	0.00115563	0.00307528	0.707081	-0.0119658	0.014277
2,5,12,16	0.00630864	0.00307528	0.0402318	-0.00681275	0.01943
2,5,13,14	-0.00121156	0.00307528	0.693605	-0.014333	0.0119098
2,5,13,15	-0.0028015	0.00307528	0.362313	-0.0159229	0.0103199
2,5,13,16	-0.00170747	0.00307528	0.578744	-0.0148289	0.0114139
2,5,14,15	0.00014802	0.00307528	0.961611	-0.0129734	0.0132694
2,5,14,16	0.00102327	0.00307528	0.739331	-0.0120981	0.0141447
2,5,15,16	0.00305996	0.00307528	0.319732	-0.0100614	0.0161813
2,6,7,8	-0.00304611	0.00307528	0.321926	-0.0161675	0.0100753
2,6,7,9	-0.0019812	0.00307528	0.519426	-0.0151026	0.0111402
2,6,7,10	0.00184089	0.00307528	0.549436	-0.0112805	0.0149623
2,6,7,11	-0.000981824	0.00307528	0.749528	-0.0141032	0.0121396
2,6,7,12	-0.0034561	0.00307528	0.261089	-0.0165775	0.00966529
2,6,7,13	-0.00204297	0.00307528	0.506487	-0.0151644	0.0110784
2,6,7,14	-0.000982754	0.00307528	0.749299	-0.0141041	0.0121386
2,6,7,15	0.00214156	0.00307528	0.486195	-0.0109798	0.0152629
2,6,7,16	-0.00566573	0.00307528	0.0654293	-0.0187871	0.00745566
2,6,8,9	0.00400236	0.00307528	0.193105	-0.00911902	0.0171237
2,6,8,10	0.00026944	0.00307528	0.930183	-0.0128519	0.0133908
2,6,8,11	0.000766558	0.00307528	0.803157	-0.0123548	0.0138879
2,6,8,12	0.00228741	0.00307528	0.456997	-0.010834	0.0154088
2,6,8,13	-0.00195825	0.00307528	0.524276	-0.0150796	0.0111631
2,6,8,14	-0.000881278	0.00307528	0.774444	-0.0140027	0.0122401
2,6,8,15	-0.00219882	0.00307528	0.474613	-0.0153202	0.0109226
2,6,8,16	0.00110487	0.00307528	0.719392	-0.0120165	0.0142263
2,6,9,10	-0.00640958	0.00307528	0.0371437	-0.019531	0.00671181
2,6,9,11	-0.00374046	0.00307528	0.223876	-0.0168618	0.00938093
2,6,9,12	-0.00154958	0.00307528	0.614346	-0.014671	0.0115718
2,6,9,13	8.38598e-05	0.00307528	0.978245	-0.0130375	0.0132052
2,6,9,14	-0.00270149	0.00307528	0.379702	-0.0158229	0.0104199
2,6,9,15	0.00199541	0.00307528	0.516435	-0.011126	0.0151168
2,6,9,16	-0.00052652	0.00307528	0.864059	-0.0136479	0.0125949
2,6,10,11	-0.0023915	0.00307528	0.436777	-0.0155129	0.0107299
2,6,10,12	-0.00194156	0.00307528	0.527817	-0.0150629	0.0111798
2,6,10,13	-0.00032875	0.00307528	0.914868	-0.0134501	0.0127926
2,6,10,14	0.000805995	0.00307528	0.793254	-0.0123154	0.0139274
2,6,10,15	0.00330278	0.00307528	0.282837	-0.0098186	0.0164242
2,6,10,16	0.0014386	0.00307528	0.639932	-0.0116828	0.01456
2,6,11,12	0.00223025	0.00307528	0.468321	-0.0108911	0.0153516
2,6,11,13	0.00147863	0.00307528	0.630653	-0.0116428	0.0146
2,6,11,14	-0.00146237	0.00307528	0.634415	-0.0145838	0.011659
2,6,11,15	0.00182172	0.00307528	0.553602	-0.0112997	0.0149431
2,6,11,16	-0.00134435	0.00307528	0.662007	-0.0144657	0.011777
2,6,12,13	-0.000941753	0.00307528	0.759428	-0.0140631	0.0121796
2,6,12,14	-0.00416603	0.00307528	0.175523	-0.0172874	0.00895535
2,6,12,15	0.00200863	0.00307528	0.51366	-0.0111128	0.01513
2,6,12,16	0.00356819	0.00307528	0.245939	-0.0095532	0.0166896
2,6,13,14	-0.00251391	0.00307528	0.41367	-0.0156353	0.0106075
2,6,13,15	-0.000742942	0.00307528	0.809102	-0.0138643	0.0123784
2,6,13,16	0.00257168	0.00307528	0.403021	-0.0105497	0.0156931
2,6,14,15	0.00204785	0.00307528	0.505472	-0.0110735	0.0151692
2,6,14,16	-0.00180326	0.00307528	0.557626	-0.0149247	0.0113181
2,6,15,16	-0.00291597	0.00307528	0.343033	-0.0160374	0.0102054
2,7,8,9	-0.00382313	0.00307528	0.213806	-0.0169445	0.00929826
2,7,8,10	-0.00445405	0.00307528	0.147527	-0.0175754	0.00866733
2,7,8,11	-0.0042141	0.00307528	0.170594	-0.0173355	0.00890729
2,7,8,12	-0.0031879	0.00307528	0.299916	-0.0163093	0.00993348
2,7,8,13	-0.00215667	0.00307528	0.483123	-0.0152781	0.0109647
2,7,8,14	0.00291171	0.00307528	0.343739	-0.0102097	0.0160331
2,7,8,15	-0.000922072	0.00307528	0.764305	-0.0140435	0.0121993
2,7,8,16	-0.000434757	0.00307528	0.887577	-0.0135561	0.0126866
2,7,9,10	-0.00604261	0.00307528	0.0494307	-0.019164	0.00707878
2,7,9,11	-0.00992787	0.00307528	0.001246	-0.0230493	0.00319352
2,7,9,12	-0.00468829	0.00307528	0.127387	-0.0178097	0.00843309
2,7,9,13	0.00304565	0.00307528	0.321999	-0.0100757	0.016167
2,7,9,14	-0.000893262	0.00307528	0.771461	-0.0140146	0.0122281
2,7,9,15	-0.000761941	0.00307528	0.804318	-0.0138833	0.0123594
2,7,9,16	-0.000859631	0.00307528	0.77984	-0.013981	0.0122618
2,7,10,11	-0.00786624	0.00307528	0.0105331	-0.0209876	0.00525514
2,7,10,12	-0.0023748	0.00307528	0.439986	-0.0154962	0.0107466
2,7,10,13	0.00484457	0.00307528	0.115187	-0.00827682	0.017966
2,7,10,14	-0.000366876	0.00307528	0.905039	-0.0134883	0.0127545
2,7,10,15	-0.000135025	0.00307528	0.964979	-0.0132564	0.0129864
2,7,10,16	-0.00581049	0.00307528	0.0588405	-0.0189319	0.0073109
2,7,11,12	0.00130324	0.00307528	0.671728	-0.0118181	0.0144246
2,7,11,13	-0.00263277	0.00307528	0.391941	-0.0157542	0.0104886
2,7,11,14	-0.00435218	0.00307528	0.157011	-0.0174736	0.00876921
2,7,11,15	-0.000275517	0.00307528	0.928613	-0.0133969	0.0128459
2,7,11,16	-0.00453798	0.00307528	0.140048	-0.0176594	0.00858341
2,7,12,13	-0.000465536	0.00307528	0.879677	-0.0135869	0.0126559
2,7,12,14	-0.00710664	0.00307528	0.0208421	-0.020228	0.00601475
2,7,12,15	-0.00127003	0.00307528	0.679623	-0.0143914	0.0118514
2,7,12,16	-0.00362626	0.00307528	0.238337	-0.0167476	0.00949513
2,7,13,14	-0.00286506	0.00307528	0.351525	-0.0159865	0.0102563
2,7,13,15	0.00169447	0.00307528	0.581637	-0.0114269	0.0148159
2,7,13,16	-0.00380457	0.00307528	0.216038	-0.016926	0.00931682
2,7,14,15	0.000104655	0.00307528	0.972853	-0.0130167	0.013226
2,7,14,16	-0.00129563	0.00307528	0.673533	-0.014417	0.0118258
2,7,15,16	-0.00486181	0.00307528	0.113898	-0.0179832	0.00825957
2,8,9,10	0.00885917	0.00307528	0.00396839	-0.00426221	0.0219806
2,8,9,11	-0.0028062	0.00307528	0.361507	-0.0159276	0.0103152
2,8,9,12	-1.30092e-05	0.00307528	0.996625	-0.0131344	0.0131084
2,8,9,13	-0.00197444	0.00307528	0.520852	-0.0150958	0.0111469
2,8,9,14	0.00201469	0.00307528	0.51239	-0.0111067	0.0151361
2,8,9,15	0.00402703	0.00307528	0.190375	-0.00909436	0.0171484
2,8,9,16	0.00168502	0.00307528	0.583746	-0.0114364	0.0148064
2,8,10,11	-0.00618255	0.00307528	0.044393	-0.0193039	0.00693884
2,8,10,12	-0.00438013	0.00307528	0.154363	-0.0175015	0.00874125
2,8,10,13	-0.00277324	0.00307528	0.367175	-0.0158946	0.0103481
2,8,10,14	0.0012713	0.00307528	0.67932	-0.0118501	0.0143927
2,8,10,15	-0.00214376	0.00307528	0.485747	-0.0152651	0.0109776
2,8,10,16	-0.00319437	0.00307528	0.298937	-0.0163158	0.00992702
2,8,11,12	0.00227102	0.00307528	0.460227	-0.0108504	0.0153924
2,8,11,13	-0.00248965	0.00307528	0.418192	-0.015611	0.0106317
2,8,11,14	-0.00214744	0.00307528	0.484998	-0.0152688	0.0109739
2,8,11,15	-0.00231955	0.00307528	0.450698	-0.0154409	0.0108018
2,8,11,16	-0.004083	0.00307528	0.184288	-0.0172044	0.00903839
2,8,12,13	0.0023011	0.00307528	0.454309	-0.0108203	0.0154225
2,8,12,14	0.00154532	0.00307528	0.615319	-0.0115761	0.0146667
2,8,12,15	-0.00292195	0.00307528	0.342044	-0.0160433	0.0101994
2,8,12,16	0.00156808	0.00307528	0.610125	-0.0115533	0.0146895
2,8,13,14	-0.00207361	0.00307528	0.500133	-0.015195	0.0110478
2,8,13,15	0.000250181	0.00307528	0.935162	-0.0128712	0.0133716
2,8,13,16	0.000807476	0.00307528	0.792883	-0.0123139	0.0139289
2,8,14,15	-0.00202432	0.00307528	0.510377	-0.0151457	0.0110971
2,8,14,16	-0.0013661	0.00307528	0.656886	-0.0144875	0.0117553
2,8,15,16	0.00335975	0.00307528	0.274617	-0.00976164	0.0164811
2,9,10,11	-0.00519648	0.00307528	0.0910793	-0.0183179	0.00792491
2,9,10,12	0.00116285	0.00307528	0.705338	-0.0119585	0.0142842
2,9,10,13	0.00147637	0.00307528	0.631174	-0.011645	0.0145978
2,9,10,14	0.00357031	0.00307528	0.245658	-0.00955107	0.0166917
2,9,10,15	-0.0044757	0.00307528	0.145569	-0.0175971	0.00864568
2,9,10,16	-0.00416169	0.00307528	0.175974	-0.0172831	0.0089597
2,9,11,12	0.00131524	0.00307528	0.668885	-0.0118061	0.0144366
2,9,11,13	-0.00167181	0.00307528	0.586699	-0.0147932	0.0114496
2,9,11,14	-0.00149405	0.00307528	0.627093	-0.0146154	0.0116273
2,9,11,15	0.000583238	0.00307528	0.849581	-0.0125381	0.0137046
2,9,11,16	-0.0032184	0.00307528	0.295317	-0.0163398	0.00990299
2,9,12,13	0.00378006	0.00307528	0.21901	-0.00934132	0.0169014
2,9,12,14	0.00533529	0.00307528	0.082764	-0.00778609	0.0184567
2,9,12,15	-0.00471148	0.00307528	0.125515	-0.0178329	0.0084099
2,9,12,16	-0.00224317	0.00307528	0.465747	-0.0153646	0.0108782
2,9,13,14	-0.00109479	0.00307528	0.721844	-0.0142162	0.0120266
2,9,13,15	0.00153842	0.00307528	0.616898	-0.011583	0.0146598
2,9,13,16	-0.00100899	0.00307528	0.742839	-0.0141304	0.0121124
2,9,14,15	-0.00478972	0.00307528	0.119359	-0.0179111	0.00833167
2,9,14,16	-0.00203053	0.00307528	0.50908	-0.0151519	0.0110909
2,9,15,16	0.00172341	0.00307528	0.575203	-0.011398	0.0148448
2,10,11,12	-0.00291235	0.00307528	0.343633	-0.0160337	0.010209
2,10,11,13	-0.00222213	0.00307528	0.469942	-0.0153435	0.0108993
2,10,11,14	0.00022005	0.00307528	0.942957	-0.0129013	0.0133414
2,10,11,15	0.00435918	0.00307528	0.156344	-0.0087622	0.0174806
2,10,11,16	-0.00598451	0.00307528	0.0516586	-0.0191059	0.00713688
2,10,12,13	0.00171109	0.00307528	0.577939	-0.0114103	0.0148325
2,10,12,14	0.000879924	0.00307528	0.774781	-0.0122415	0.0140013
2,10,12,15	0.00253462	0.00307528	0.409834	-0.0105868	0.015656
2,10,12,16	0.000575446	0.00307528	0.851567	-0.0125459	0.0136968
2,10,13,14	0.00254994	0.00307528	0.407009	-0.0105714	0.0156713
2,10,13,15	-0.00161411	0.00307528	0.599678	-0.0147355	0.0115073
2,10,13,16	-0.000164903	0.00307528	0.957236	-0.0132863	0.0129565
2,10,14,15	-0.00469856	0.00307528	0.126556	-0.0178199	0.00842283
2,10,14,16	-0.00108338	0.00307528	0.724624	-0.0142048	0.012038
2,10,15,16	0.0059616	0.00307528	0.0525601	-0.00715979	0.019083
2,11,12,13	0.00420125	0.00307528	0.171901	-0.00892014	0.0173226
2,11,12,14	0.000469252	0.00307528	0.878724	-0.0126521	0.0135906
2,11,12,15	0.00456762	0.00307528	0.137477	-0.00855376	0.017689
2,11,12,16	0.000533737	0.00307528	0.862214	-0.0125877	0.0136551
2,11,13,14	-0.00113896	0.00307528	0.711116	-0.0142603	0.0119824
2,11,13,15	-0.000774441	0.00307528	0.801175	-0.0138958	0.0123469
2,11,13,16	0.00172692	0.00307528	0.574425	-0.0113945	0.0148483
2,11,14,15	0.00131982	0.00307528	0.667802	-0.0118016	0.0144412
2,11,14,16	-0.000193013	0.00307528	0.949956	-0.0133144	0.0129284
2,11,15,16	0.00568519	0.00307528	0.0645097	-0.0074362	0.0188066
2,12,13,14	0.00477997	0.00307528	0.120113	-0.00834141	0.0179014
2,12,13,15	0.00529156	0.00307528	0.0853146	-0.00782983	0.0184129
2,12,13,16	-0.00352776	0.00307528	0.251331	-0.0166491	0.00959363
2,12,14,15	-0.00150625	0.00307528	0.624283	-0.0146276	0.0116151
2,12,14,16	-0.000721793	0.00307528	0.814436	-0.0138432	0.0123996
2,12,15,16	-0.0086654	0.00307528	0.00483749	-0.0217868	0.00445598
2,13,14,15	-0.00215244	0.00307528	0.483981	-0.0152738	0.0109689
2,13,14,16	0.00359644	0.00307528	0.24222	-0.00952495	0.0167178
2,13,15,16	0.000960329	0.00307528	0.754834	-0.0121611	0.0140817
2,14,15,16	-0.000730223	0.00307528	0.812309	-0.0138516	0.0123912
3,4,5,6	0.0241282	0.00307528	4.36793e-15	0.0110068	0.0372495
3,4,5,7	-0.123357	0.00307528	0	-0.136478	-0.110235
3,4,5,8	-0.100727	0.00307528	2.47602e-233	-0.113848	-0.0876055
3,4,5,9	0.0169135	0.00307528	3.81614e-08	0.00379215	0.0300349
3,4,5,10	-0.0480861	0.00307528	5.22759e-55	-0.0612075	-0.0349647
3,4,5,11	-0.124003	0.00307528	0	-0.137124	-0.110882
3,4,5,12	-0.0455074	0.00307528	1.8329e-49	-0.0586288	-0.032386
3,4,5,13	-0.00667035	0.00307528	0.0300848	-0.0197917	0.00645104
3,4,5,14	0.00265631	0.00307528	0.387722	-0.0104651	0.0157777
3,4,5,15	-0.0269207	0.00307528	2.11059e-18	-0.0400421	-0.0137994
3,4,5,16	-0.0362545	0.00307528	4.80662e-32	-0.0493759	-0.0231331
3,4,6,7	0.000143916	0.00307528	0.962675	-0.0129775	0.0132653
3,4,6,8	-0.00256004	0.00307528	0.405154	-0.0156814	0.0105613
3,4,6,9	-0.00275878	0.00307528	0.369678	-0.0158802	0.0103626
3,4,6,10	0.00552121	0.00307528	0.0726024	-0.00760018	0.0186426
3,4,6,11	0.00214518	0.00307528	0.485457	-0.0109762	0.0152666
3,4,6,12	-0.00208982	0.00307528	0.49679	-0.0152112	0.0110316
3,4,6,13	0.00269502	0.00307528	0.380844	-0.0104264	0.0158164
3,4,6,14	0.00179102	0.00307528	0.560305	-0.0113304	0.0149124
3,4,6,15	0.00321819	0.00307528	0.295348	-0.0099032	0.0163396
3,4,6,16	0.00450201	0.00307528	0.143216	-0.00861937	0.0176234
3,4,7,8	0.0800887	0.00307528	1.0007e-148	0.0669673	0.0932101
3,4,7,9	0.0100215	0.00307528	0.00111971	-0.00309987	0.0231429
3,4,7,10	0.0458134	0.00307528	4.17615e-50	0.0326921	0.0589348
3,4,7,11	0.084617	0.00307528	1.10885e-165	0.0714956	0.0977384
3,4,7,12	0.0142178	0.00307528	3.78505e-06	0.00109643	0.0273392
3,4,7,13	-0.000148286	0.00307528	0.961542	-0.0132697	0.0129731
3,4,7,14	-0.000343397	0.00307528	0.91109	-0.0134648	0.012778
3,4,7,15	-0.00648678	0.00307528	0.0349201	-0.0196082	0.00663461
3,4,7,16	0.0113289	0.00307528	0.000229926	-0.0017925	0.0244503
3,4,8,9	-0.0281704	0.00307528	5.3267e-20	-0.0412918	-0.015049
3,4,8,10	0.0578686	0.00307528	8.96252e-79	0.0447472	0.07099
3,4,8,11	0.113787	0.00307528	1.72774e-296	0.100666	0.126909
3,4,8,12	0.0151156	0.00307528	8.89235e-07	0.00199417	0.0282369
3,4,8,13	0.00353208	0.00307528	0.25075	-0.0095893	0.0166535
3,4,8,14	0.00216915	0.00307528	0.480594	-0.0109522	0.0152905
3,4,8,15	-0.00963408	0.00307528	0.00173257	-0.0227555	0.00348731
3,4,8,16	0.00805357	0.00307528	0.00882584	-0.00506781	0.021175
3,4,9,10	0.0132352	0.00307528	1.68193e-05	0.000113815	0.0263566
3,4,9,11	0.0333327	0.00307528	2.38014e-27	0.0202113	0.0464541
3,4,9,12	-0.00633008	0.00307528	0.0395583	-0.0194515	0.00679131
3,4,9,13	0.00265766	0.00307528	0.38748	-0.0104637	0.0157791
3,4,9,14	0.00518153	0.00307528	0.0920137	-0.00793986	0.0183029
3,4,9,15	0.000103491	0.00307528	0.973154	-0.0130179	0.0132249
3,4,9,16	0.00161775	0.00307528	0.598855	-0.0115036	0.0147391
3,4,10,11	0.0734593	0.00307528	1.51539e-125	0.0603379	0.0865807
3,4,10,12	0.0244792	0.00307528	1.74915e-15	0.0113578	0.0376006
3,4,10,13	0.00469814	0.00307528	0.126589	-0.00842324	0.0178195
3,4,10,14	0.00224389	0.00307528	0.465605	-0.0108775	0.0153653
3,4,10,15	0.000990981	0.00307528	0.747271	-0.0121304	0.0141124
3,4,10,16	0.0305011	0.00307528	3.61e-23	0.0173797	0.0436225
3,4,11,12	0.0272164	0.00307528	8.96838e-19	0.014095	0.0403378
3,4,11,13	0.0137528	0.00307528	7.76099e-06	0.000631408	0.0268742
3,4,11,14	0.00387246	0.00307528	0.207955	-0.00924893	0.0169938
3,4,11,15	0.0149868	0.00307528	1.10013e-06	0.00186539	0.0281082
3,4,11,16	0.0368493	0.00307528	4.77265e-33	0.0237279	0.0499707
3,4,12,13	-0.00149839	0.00307528	0.626093	-0.0146198	0.011623
3,4,12,14	-0.00249111	0.00307528	0.417918	-0.0156125	0.0106303
3,4,12,15	-0.0046151	0.00307528	0.133436	-0.0177365	0.00850628
3,4,12,16	0.00892461	0.00307528	0.0037086	-0.00419678	0.022046
3,4,13,14	0.00809485	0.00307528	0.00848466	-0.00502653	0.0212162
3,4,13,15	-0.00352917	0.00307528	0.251141	-0.0166506	0.00959222
3,4,13,16	0.00163765	0.00307528	0.594367	-0.0114837	0.014759
3,4,14,15	-0.00460441	0.00307528	0.134337	-0.0177258	0.00851697
3,4,14,16	-0.00226456	0.00307528	0.461506	-0.0153859	0.0108568
3,4,15,16	0.00636064	0.00307528	0.0386146	-0.00676074	0.019482
3,5,6,7	-0.00235881	0.00307528	0.443071	-0.0154802	0.0107626
3,5,6,8	0.0153331	0.00307528	6.18351e-07	0.00221168	0.0284544
3,5,6,9	0.00110046	0.00307528	0.720464	-0.0120209	0.0142218
3,5,6,10	-0.00255363	0.00307528	0.406331	-0.015675	0.0105678
3,5,6,11	0.00303363	0.00307528	0.323912	-0.0100878	0.016155
3,5,6,12	-0.000308485	0.00307528	0.920098	-0.0134299	0.0128129
3,5,6,13	-0.00133016	0.00307528	0.665355	-0.0144516	0.0117912
3,5,6,14	-0.00543947	0.00307528	0.0769369	-0.0185609	0.00768192
3,5,6,15	0.00302576	0.00307528	0.32517	-0.0100956	0.0161471
3,5,6,16	-0.00282921	0.00307528	0.357585	-0.0159506	0.0102922
3,5,7,8	0.0903685	0.00307528	1.59161e-188	0.0772471	0.10349
3,5,7,9	-0.000253713	0.00307528	0.934249	-0.0133751	0.0128677
3,5,7,10	0.0412771	0.00307528	5.10167e-41	0.0281557	0.0543985
3,5,7,11	0.108727	0.00307528	3.82856e-271	0.0956057	0.121848
3,5,7,12	-0.0115361	0.00307528	0.000176128	-0.0246575	0.00158531
3,5,7,13	0.0041368	0.00307528	0.178573	-0.00898459	0.0172582
3,5,7,14	0.00227428	0.00307528	0.459585	-0.0108471	0.0153957
3,5,7,15	-0.0157744	0.00307528	2.91478e-07	-0.0288958	-0.00265305
3,5,7,16	-0.00494135	0.00307528	0.108104	-0.0180627	0.00818003
3,5,8,9	0.0244289	0.00307528	1.99562e-15	0.0113075	0.0375503
3,5,8,10	0.0278403	0.00307528	1.43031e-19	0.0147189	0.0409617
3,5,8,11	0.0929919	0.00307528	1.98796e-199	0.0798705	0.106113
3,5,8,12	0.0114131	0.00307528	0.000206415	-0.00170825	0.0245345
3,5,8,13	0.00413605	0.00307528	0.178651	-0.00898533	0.0172574
3,5,8,14	-0.00186806	0.00307528	0.543558	-0.0149894	0.0112533
3,5,8,15	0.00106595	0.00307528	0.72888	-0.0120554	0.0141873
3,5,8,16	0.0276378	0.00307528	2.60721e-19	0.0145164	0.0407591
3,5,9,10	-0.0170795	0.00307528	2.80645e-08	-0.0302009	-0.00395811
3,5,9,11	0.0128046	0.00307528	3.13506e-05	-0.00031675	0.025926
3,5,9,12	0.000442427	0.00307528	0.885607	-0.012679	0.0135638
3,5,9,13	0.000989831	0.00307528	0.747555	-0.0121316	0.0141112
3,5,9,14	0.000252236	0.00307528	0.934631	-0.0128691	0.0133736
3,5,9,15	-0.0141719	0.00307528	4.06704e-06	-0.0272933	-0.00105053
3,5,9,16	-0.0076731	0.00307528	0.0125951	-0.0207945	0.00544829
3,5,10,11	-0.0113839	0.00307528	0.000214317	-0.0245052	0.00173753
3,5,10,12	0.0100133	0.00307528	0.00113031	-0.0031081	0.0231347
3,5,10,13	0.00150422	0.00307528	0.62475	-0.0116172	0.0146256
3,5,10,14	-0.00224701	0.00307528	0.464984	-0.0153684	0.0108744
3,5,10,15	0.0113709	0.00307528	0.000217897	-0.00175046	0.0244923
3,5,10,16	0.0184383	0.00307528	2.03755e-09	0.00531696	0.0315597
3,5,11,12	0.0198234	0.00307528	1.15637e-10	0.00670199	0.0329448
3,5,11,13	0.00740072	0.00307528	0.0161082	-0.00572066	0.0205221
3,5,11,14	-0.00137914	0.00307528	0.653822	-0.0145005	0.0117422
3,5,11,15	0.00406385	0.00307528	0.186354	-0.00905754	0.0171852
3,5,11,16	0.0431284	0.00307528	1.29383e-44	0.030007	0.0562498
3,5,12,13	0.000292424	0.00307528	0.924245	-0.012829	0.0134138
3,5,12,14	-0.0014951	0.00307528	0.626851	-0.0146165	0.0116263
3,5,12,15	-0.00879461	0.00307528	0.00424081	-0.021916	0.00432678
3,5,12,16	-0.00519682	0.00307528	0.0910581	-0.0183182	0.00792457
3,5,13,14	0.00327042	0.00307528	0.287579	-0.00985096	0.0163918
3,5,13,15	-0.00564183	0.00307528	0.0665737	-0.0187632	0.00747956
3,5,13,16	0.00170941	0.00307528	0.578311	-0.011412	0.0148308
3,5,14,15	-0.000776127	0.00307528	0.800751	-0.0138975	0.0123453
3,5,14,16	-0.00131202	0.00307528	0.669648	-0.0144334	0.0118094
3,5,15,16	-0.031695	0.00307528	6.90164e-25	-0.0448164	-0.0185736
3,6,7,8	0.00112397	0.00307528	0.714751	-0.0119974	0.0142454
3,6,7,9	-0.00241451	0.00307528	0.432377	-0.0155359	0.0107069
3,6,7,10	-0.0121175	0.00307528	8.14693e-05	-0.0252389	0.00100388
3,6,7,11	-0.00452641	0.00307528	0.141061	-0.0176478	0.00859497
3,6,7,12	0.0046933	0.00307528	0.12698	-0.00842808	0.0178147
3,6,7,13	-0.00163771	0.00307528	0.594353	-0.0147591	0.0114837
3,6,7,14	-0.00172813	0.00307528	0.574157	-0.0148495	0.0113933
3,6,7,15	-0.00289388	0.00307528	0.346702	-0.0160153	0.0102275
3,6,7,16	0.00717605	0.00307528	0.0196271	-0.00594534	0.0202974
3,6,8,9	0.0042397	0.00307528	0.168011	-0.00888169	0.0173611
3,6,8,10	-0.00812931	0.00307528	0.0082089	-0.0212507	0.00499207
3,6,8,11	-0.000799206	0.00307528	0.794957	-0.0139206	0.0123222
3,6,8,12	-0.00488339	0.00307528	0.112303	-0.0180048	0.008238
3,6,8,13	-0.00273459	0.00307528	0.37389	-0.015856	0.0103868
3,6,8,14	-0.00105234	0.00307528	0.732206	-0.0141737	0.012069
3,6,8,15	-0.00464227	0.00307528	0.131165	-0.0177637	0.00847912
3,6,8,16	0.00383918	0.00307528	0.211889	-0.0092822	0.0169606
3,6,9,10	-0.00634178	0.00307528	0.0391947	-0.0194632	0.00677961
3,6,9,11	-0.00121557	0.00307528	0.692644	-0.014337	0.0119058
3,6,9,12	0.00267263	0.00307528	0.384812	-0.0104488	0.015794
3,6,9,13	-0.00342346	0.00307528	0.265619	-0.0165448	0.00969793
3,6,9,14	0.000393612	0.00307528	0.898155	-0.0127278	0.013515
3,6,9,15	-0.0050508	0.00307528	0.100515	-0.0181722	0.00807059
3,6,9,16	-0.00472877	0.00307528	0.124134	-0.0178502	0.00839262
3,6,10,11	-0.0213952	0.00307528	3.50569e-12	-0.0345166	-0.00827384
3,6,10,12	-0.00420279	0.00307528	0.171744	-0.0173242	0.00891859
3,6,10,13	0.00344279	0.00307528	0.26293	-0.0096786	0.0165642
3,6,10,14	-0.00307422	0.00307528	0.317482	-0.0161956	0.0100472
3,6,10,15	-0.00634761	0.00307528	0.0390147	-0.019469	0.00677378
3,6,10,16	-0.00350469	0.00307528	0.254443	-0.0166261	0.00961669
3,6,11,12	0.00149912	0.00307528	0.625923	-0.0116223	0.0146205
3,6,11,13	-0.0041948	0.00307528	0.17256	-0.0173162	0.00892658
3,6,11,14	0.00179728	0.00307528	0.558935	-0.0113241	0.0149187
3,6,11,15	7.8792e-06	0.00307528	0.997956	-0.0131135	0.0131293
3,6,11,16	-0.00105373	0.00307528	0.731867	-0.0141751	0.0120677
3,6,12,13	0.00114216	0.00307528	0.710341	-0.0119792	0.0142635
3,6,12,14	-0.00292477	0.00307528	0.341579	-0.0160462	0.0101966
3,6,12,15	-0.00113909	0.00307528	0.711085	-0.0142605	0.0119823
3,6,12,16	0.00468517	0.00307528	0.12764	-0.00843622	0.0178066
3,6,13,14	-0.0024365	0.00307528	0.428198	-0.0155579	0.0106849
3,6,13,15	-0.000564082	0.00307528	0.854465	-0.0136855	0.0125573
3,6,13,16	0.000808162	0.00307528	0.792711	-0.0123132	0.0139295
3,6,14,15	0.000845742	0.00307528	0.783307	-0.0122756	0.0139671
3,6,14,16	-0.00155501	0.00307528	0.613105	-0.0146764	0.0115664
3,6,15,16	-0.00220896	0.00307528	0.472577	-0.0153304	0.0109124
3,7,8,9	-0.0590367	0.00307528	6.70197e-82	-0.0721581	-0.0459153
3,7,8,10	-0.00235128	0.00307528	0.444529	-0.0154727	0.0107701
3,7,8,11	-0.00422356	0.00307528	0.169636	-0.0173449	0.00889783
3,7,8,12	-0.0074735	0.00307528	0.0150939	-0.0205949	0.00564789
3,7,8,13	0.00365758	0.00307528	0.234307	-0.0094638	0.016779
3,7,8,14	-0.00651846	0.00307528	0.0340412	-0.0196398	0.00660293
3,7,8,15	-0.00901865	0.00307528	0.00336228	-0.02214	0.00410273
3,7,8,16	8.72378e-05	0.00307528	0.977369	-0.0130341	0.0132086
3,7,9,10	-0.0863784	0.00307528	1.60073e-172	-0.0994998	-0.073257
3,7,9,11	-0.0333786	0.00307528	2.02249e-27	-0.0464999	-0.0202572
3,7,9,12	0.0158305	0.00307528	2.64528e-07	0.00270915	0.0289519
3,7,9,13	-0.00388412	0.00307528	0.206589	-0.0170055	0.00923727
3,7,9,14	0.000305812	0.00307528	0.920788	-0.0128156	0.0134272
3,7,9,15	0.013716	0.00307528	8.20682e-06	0.000594627	0.0268374
3,7,9,16	0.00186326	0.00307528	0.544594	-0.0112581	0.0149846
3,7,10,11	0.0233857	0.00307528	2.90127e-14	0.0102643	0.0365071
3,7,10,12	-0.0232936	0.00307528	3.65532e-14	-0.036415	-0.0101722
3,7,10,13	0.00445017	0.00307528	0.14788	-0.00867121	0.0175716
3,7,10,14	0.00169699	0.00307528	0.581075	-0.0114244	0.0148184
3,7,10,15	-0.0251442	0.00307528	2.98265e-16	-0.0382656	-0.0120228
3,7,10,16	0.00437434	0.00307528	0.154909	-0.00874704	0.0174957
3,7,11,12	0.024689	0.00307528	1.00593e-15	0.0115676	0.0378104
3,7,11,13	0.00353558	0.00307528	0.250281	-0.00958581	0.016657
3,7,11,14	-0.0066605	0.00307528	0.0303287	-0.0197819	0.00646088
3,7,11,15	-0.0090879	0.00307528	0.00312639	-0.0222093	0.00403349
3,7,11,16	0.0204682	0.00307528	2.84199e-11	0.00734685	0.0335896
3,7,12,13	-0.00658628	0.00307528	0.0322226	-0.0197077	0.0065351
3,7,12,14	-0.00362395	0.00307528	0.238637	-0.0167453	0.00949744
3,7,12,15	0.024967	0.00307528	4.79954e-16	0.0118456	0.0380884
3,7,12,16	0.0111478	0.00307528	0.00028921	-0.00197355	0.0242692
3,7,13,14	0.00517984	0.00307528	0.0921195	-0.00794155	0.0183012
3,7,13,15	0.000504779	0.00307528	0.869621	-0.0126166	0.0136262
3,7,13,16	-0.00505588	0.00307528	0.100173	-0.0181773	0.00806551
3,7,14,15	0.00805482	0.00307528	0.00881539	-0.00506657	0.0211762
3,7,14,16	0.00302247	0.00307528	0.325695	-0.0100989	0.0161439
3,7,15,16	-0.0327454	0.00307528	1.87722e-26	-0.0458668	-0.0196241
3,8,9,10	0.0840233	0.00307528	2.08658e-163	0.0709019	0.0971447
3,8,9,11	0.032167	0.00307528	1.38583e-25	0.0190456	0.0452884
3,8,9,12	0.00821789	0.00307528	0.0075366	-0.0049035	0.0213393
3,8,9,13	0.00916484	0.00307528	0.00288202	-0.00395654	0.0222862
3,8,9,14	0.00193706	0.00307528	0.528775	-0.0111843	0.0150584
3,8,9,15	0.012086	0.00307528	8.5019e-05	-0.00103538	0.0252074
3,8,9,16	0.0158486	0.00307528	2.56379e-07	0.0027272	0.02897
3,8,10,11	0.0297959	0.00307528	3.48559e-22	0.0166745	0.0429173
3,8,10,12	-0.0423154	0.00307528	5.12952e-43	-0.0554368	-0.029194
3,8,10,13	0.0127968	0.00307528	3.17042e-05	-0.000324626	0.0259181
3,8,10,14	-0.00388046	0.00307528	0.207017	-0.0170018	0.00924092
3,8,10,15	-0.0047514	0.00307528	0.122344	-0.0178728	0.00836999
3,8,10,16	-0.00624121	0.00307528	0.0424138	-0.0193626	0.00688017
3,8,11,12	0.0345891	0.00307528	2.54231e-29	0.0214677	0.0477105
3,8,11,13	0.00924927	0.00307528	0.00263407	-0.00387212	0.0223707
3,8,11,14	-0.00231536	0.00307528	0.451517	-0.0154367	0.010806
3,8,11,15	0.00526603	0.00307528	0.0868328	-0.00785536	0.0183874
3,8,11,16	0.0148758	0.00307528	1.31983e-06	0.0017544	0.0279972
3,8,12,13	-0.000271302	0.00307528	0.929702	-0.0133927	0.0128501
3,8,12,14	-0.00124816	0.00307528	0.68484	-0.0143695	0.0118732
3,8,12,15	-3.29708e-05	0.00307528	0.991446	-0.0131544	0.0130884
3,8,12,16	-0.00607272	0.00307528	0.0483078	-0.0191941	0.00704866
3,8,13,14	-0.000956193	0.00307528	0.755856	-0.0140776	0.0121652
3,8,13,15	-0.00508309	0.00307528	0.0983588	-0.0182045	0.00803829
3,8,13,16	0.000850528	0.00307528	0.782112	-0.0122709	0.0139719
3,8,14,15	0.00300557	0.00307528	0.328408	-0.0101158	0.016127
3,8,14,16	0.0074778	0.00307528	0.0150357	-0.00564358	0.0205992
3,8,15,16	-0.0132731	0.00307528	1.59072e-05	-0.0263945	-0.000151745
3,9,10,11	-0.0415536	0.00307528	1.51567e-41	-0.054675	-0.0284322
3,9,10,12	-0.0113093	0.00307528	0.000235736	-0.0244307	0.00181207
3,9,10,13	0.000561972	0.00307528	0.855004	-0.0125594	0.0136834
3,9,10,14	-0.00184994	0.00307528	0.547475	-0.0149713	0.0112714
3,9,10,15	-0.0123604	0.00307528	5.84452e-05	-0.0254818	0.000760988
3,9,10,16	-0.0114012	0.00307528	0.000209607	-0.0245226	0.0017202
3,9,11,12	0.00204576	0.00307528	0.505908	-0.0110756	0.0151671
3,9,11,13	-0.00381385	0.00307528	0.214919	-0.0169352	0.00930753
3,9,11,14	0.00231626	0.00307528	0.451341	-0.0108051	0.0154376
3,9,11,15	0.00498838	0.00307528	0.104789	-0.00813301	0.0181098
3,9,11,16	-0.00199186	0.00307528	0.517182	-0.0151132	0.0111295
3,9,12,13	-0.000210251	0.00307528	0.945493	-0.0133316	0.0129111
3,9,12,14	-0.000535742	0.00307528	0.861702	-0.0136571	0.0125856
3,9,12,15	0.0104144	0.00307528	0.000708339	-0.00270695	0.0235358
3,9,12,16	-0.000987649	0.00307528	0.748092	-0.014109	0.0121337
3,9,13,14	-0.00137061	0.00307528	0.655825	-0.014492	0.0117508
3,9,13,15	0.00762371	0.00307528	0.0131766	-0.00549767	0.0207451
3,9,13,16	-0.000729643	0.00307528	0.812455	-0.013851	0.0123917
3,9,14,15	0.00497805	0.00307528	0.10551	-0.00814334	0.0180994
3,9,14,16	0.00746572	0.00307528	0.0151996	-0.00565567	0.0205871
3,9,15,16	-0.00446728	0.00307528	0.146328	-0.0175887	0.0086541
3,10,11,12	0.0187547	0.00307528	1.07677e-09	0.00563326	0.031876
3,10,11,13	0.00403014	0.00307528	0.190033	-0.00909125	0.0171515
3,10,11,14	0.00366667	0.00307528	0.233146	-0.00945471	0.0167881
3,10,11,15	0.00278148	0.00307528	0.365753	-0.0103399	0.0159029
3,10,11,16	0.00970125	0.00307528	0.00160799	-0.00342014	0.0228226
3,10,12,13	0.00633798	0.00307528	0.0393124	-0.0067834	0.0194594
3,10,12,14	-0.00101144	0.00307528	0.742237	-0.0141328	0.0121099
3,10,12,15	-0.0202324	0.00307528	4.77228e-11	-0.0333537	-0.00711097
3,10,12,16	-0.00841042	0.00307528	0.00624266	-0.0215318	0.00471096
3,10,13,14	-0.00880095	0.00307528	0.00421334	-0.0219223	0.00432044
3,10,13,15	0.0003981	0.00307528	0.897001	-0.0127233	0.0135195
3,10,13,16	0.00878899	0.00307528	0.00426528	-0.00433239	0.0219104
3,10,14,15	0.000794998	0.00307528	0.796012	-0.0123264	0.0139164
3,10,14,16	-0.00200693	0.00307528	0.514016	-0.0151283	0.0111145
3,10,15,16	0.00493072	0.00307528	0.108865	-0.00819067	0.0180521
3,11,12,13	0.00119913	0.00307528	0.696594	-0.0119223	0.0143205
3,11,12,14	7.53246e-05	0.00307528	0.980459	-0.0130461	0.0131967
3,11,12,15	0.00760123	0.00307528	0.0134491	-0.00552015	0.0207226
3,11,12,16	0.0034211	0.00307528	0.265948	-0.00970029	0.0165425
3,11,13,14	0.0044414	0.00307528	0.14868	-0.00867999	0.0175628
3,11,13,15	0.00154783	0.00307528	0.614745	-0.0115736	0.0146692
3,11,13,16	-0.00147023	0.00307528	0.632595	-0.0145916	0.0116512
3,11,14,15	0.00419392	0.00307528	0.17265	-0.00892746	0.0173153
3,11,14,16	0.00219741	0.00307528	0.474897	-0.010924	0.0153188
3,11,15,16	-0.0252109	0.00307528	2.491e-16	-0.0383323	-0.0120896
3,12,13,14	0.00149158	0.00307528	0.627662	-0.0116298	0.014613
3,12,13,15	0.00169041	0.00307528	0.582544	-0.011431	0.0148118
3,12,13,16	-0.00134509	0.00307528	0.661833	-0.0144665	0.0117763
3,12,14,15	0.00268463	0.00307528	0.382682	-0.0104368	0.015806
3,12,14,16	0.00380625	0.00307528	0.215835	-0.00931514	0.0169276
3,12,15,16	-0.0134411	0.00307528	1.2406e-05	-0.0265624	-0.000319669
3,13,14,15	-0.00135081	0.00307528	0.660483	-0.0144722	0.0117706
3,13,14,16	-0.00246932	0.00307528	0.422002	-0.0155907	0.0106521
3,13,15,16	0.0114125	0.00307528	0.000206575	-0.00170885	0.0245339
3,14,15,16	0.00167518	0.00307528	0.585945	-0.0114462	0.0147966
4,5,6,7	0.00347011	0.00307528	0.25916	-0.00965127	0.0165915
4,5,6,8	-0.00108663	0.00307528	0.723832	-0.014208	0.0120348
4,5,6,9	-0.000448486	0.00307528	0.884051	-0.0135699	0.0126729
4,5,6,10	-0.00358092	0.00307528	0.244257	-0.0167023	0.00954046
4,5,6,11	-0.0126908	0.00307528	3.68481e-05	-0.0258121	0.000430632
4,5,6,12	0.000519312	0.00307528	0.865902	-0.0126021	0.0136407
4,5,6,13	-0.00127245	0.00307528	0.679045	-0.0143938	0.0118489
4,5,6,14	0.000268931	0.00307528	0.930315	-0.0128525	0.0133903
4,5,6,15	0.00385807	0.00307528	0.209649	-0.00926331	0.0169795
4,5,6,16	0.000636873	0.00307528	0.835937	-0.0124845	0.0137583
4,5,7,8	-0.108748	0.00307528	3.03477e-271	-0.121869	-0.0956263
4,5,7,9	-0.0368092	0.00307528	5.58322e-33	-0.0499306	-0.0236878
4,5,7,10	0.0201476	0.00307528	5.74133e-11	0.0070262	0.033269
4,5,7,11	-0.108723	0.00307528	4.0164e-271	-0.121844	-0.0956014
4,5,7,12	-0.0249325	0.00307528	5.26435e-16	-0.0380539	-0.0118111
4,5,7,13	-0.00684115	0.00307528	0.0261142	-0.0199625	0.00628024
4,5,7,14	-0.00570907	0.00307528	0.0633959	-0.0188305	0.00741232
4,5,7,15	0.00582689	0.00307528	0.05813	-0.0072945	0.0189483
4,5,7,16	-0.0401271	0.00307528	7.30227e-39	-0.0532484	-0.0270057
4,5,8,9	0.0103808	0.00307528	0.00073708	-0.00274057	0.0235022
4,5,8,10	-0.0190194	0.00307528	6.2636e-10	-0.0321408	-0.00589803
4,5,8,11	-0.157452	0.00307528	0	-0.170573	-0.144331
4,5,8,12	-0.0422646	0.00307528	6.44132e-43	-0.055386	-0.0291432
4,5,8,13	-0.00094033	0.00307528	0.75978	-0.0140617	0.0121811
4,5,8,14	-0.0030021	0.00307528	0.328968	-0.0161235	0.0101193
4,5,8,15	-0.00820791	0.00307528	0.00760982	-0.0213293	0.00491348
4,5,8,16	-0.040791	0.00307528	4.22895e-40	-0.0539124	-0.0276696
4,5,9,10	0.0437053	0.00307528	9.11158e-46	0.0305839	0.0568267
4,5,9,11	-0.0325434	0.00307528	3.7888e-26	-0.0456648	-0.019422
4,5,9,12	0.0129252	0.00307528	2.63849e-05	-0.000196211	0.0260466
4,5,9,13	-0.00290381	0.00307528	0.34505	-0.0160252	0.0102176
4,5,9,14	0.000930813	0.00307528	0.762138	-0.0121906	0.0140522
4,5,9,15	0.00395325	0.00307528	0.198625	-0.00916814	0.0170746
4,5,9,16	-0.00136722	0.00307528	0.656623	-0.0144886	0.0117542
4,5,10,11	-0.0294896	0.00307528	9.18157e-22	-0.042611	-0.0163683
4,5,10,12	-0.00715282	0.00307528	0.0200266	-0.0202742	0.00596857
4,5,10,13	0.00330643	0.00307528	0.282305	-0.00981496	0.0164278
4,5,10,14	-0.000159535	0.00307528	0.958627	-0.0132809	0.0129619
4,5,10,15	-0.00217919	0.00307528	0.478566	-0.0153006	0.0109422
4,5,10,16	-0.0134148	0.00307528	1.29005e-05	-0.0265362	-0.000293392
4,5,11,12	-0.0655369	0.00307528	2.03985e-100	-0.0786583	-0.0524155
4,5,11,13	-0.00418669	0.00307528	0.173392	-0.0173081	0.0089347
4,5,11,14	-0.00501046	0.00307528	0.103261	-0.0181318	0.00811093
4,5,11,15	-0.0314298	0.00307528	1.68364e-24	-0.0445512	-0.0183084
4,5,11,16	-0.0701331	0.00307528	1.18269e-114	-0.0832544	-0.0570117
4,5,12,13	-0.00331885	0.00307528	0.280502	-0.0164402	0.00980254
4,5,12,14	0.000179887	0.00307528	0.953355	-0.0129415	0.0133013
4,5,12,15	0.000482401	0.00307528	0.875352	-0.012639	0.0136038
4,5,12,16	-0.0174104	0.00307528	1.50783e-08	-0.0305318	-0.00428904
4,5,13,14	-0.00179635	0.00307528	0.559138	-0.0149177	0.011325
4,5,13,15	0.0013298	0.00307528	0.665441	-0.0117916	0.0144512
4,5,13,16	0.00154431	0.00307528	0.61555	-0.0115771	0.0146657
4,5,14,15	0.000288747	0.00307528	0.925195	-0.0128326	0.0134101
4,5,14,16	0.00531757	0.00307528	0.0837903	-0.00780382	0.018439
4,5,15,16	0.00218284	0.00307528	0.477829	-0.0109385	0.0153042
4,6,7,8	-0.00458083	0.00307528	0.136343	-0.0177022	0.00854055
4,6,7,9	-0.00111913	0.00307528	0.715926	-0.0142405	0.0120023
4,6,7,10	-0.00369269	0.00307528	0.229846	-0.0168141	0.00942869
4,6,7,11	-0.000502807	0.00307528	0.870126	-0.0136242	0.0126186
4,6,7,12	-0.00189272	0.00307528	0.538251	-0.0150141	0.0112287
4,6,7,13	-0.00176104	0.00307528	0.566887	-0.0148824	0.0113603
4,6,7,14	-0.00146493	0.00307528	0.633822	-0.0145863	0.0116565
4,6,7,15	0.000638417	0.00307528	0.835545	-0.012483	0.0137598
4,6,7,16	-0.0027175	0.00307528	0.376883	-0.0158389	0.0104039
4,6,8,9	-0.000515837	0.00307528	0.866791	-0.0136372	0.0126055
4,6,8,10	0.00188872	0.00307528	0.53911	-0.0112327	0.0150101
4,6,8,11	0.00867452	0.00307528	0.00479301	-0.00444686	0.0217959
4,6,8,12	0.00466123	0.00307528	0.129598	-0.00846016	0.0177826
4,6,8,13	0.000399327	0.00307528	0.896685	-0.0127221	0.0135207
4,6,8,14	-0.000667437	0.00307528	0.828183	-0.0137888	0.0124539
4,6,8,15	0.00195662	0.00307528	0.524621	-0.0111648	0.015078
4,6,8,16	0.000928612	0.00307528	0.762683	-0.0121928	0.01405
4,6,9,10	0.00099891	0.00307528	0.745319	-0.0121225	0.0141203
4,6,9,11	0.00661611	0.00307528	0.0314496	-0.00650527	0.0197375
4,6,9,12	0.00101155	0.00307528	0.742211	-0.0121098	0.0141329
4,6,9,13	0.000197413	0.00307528	0.948816	-0.012924	0.0133188
4,6,9,14	-0.00763437	0.00307528	0.0130492	-0.0207558	0.00548702
4,6,9,15	0.00152336	0.00307528	0.62035	-0.011598	0.0146447
4,6,9,16	-0.00297394	0.00307528	0.333524	-0.0160953	0.0101474
4,6,10,11	0.00907877	0.00307528	0.00315658	-0.00404261	0.0222002
4,6,10,12	0.00351715	0.00307528	0.252759	-0.00960423	0.0166385
4,6,10,13	0.00134089	0.00307528	0.662823	-0.0117805	0.0144623
4,6,10,14	0.00448298	0.00307528	0.144915	-0.0086384	0.0176044
4,6,10,15	-0.000332843	0.00307528	0.913812	-0.0134542	0.0127885
4,6,10,16	0.00276283	0.00307528	0.368976	-0.0103586	0.0158842
4,6,11,12	0.00208061	0.00307528	0.498688	-0.0110408	0.015202
4,6,11,13	5.2643e-06	0.00307528	0.998634	-0.0131161	0.0131266
4,6,11,14	0.00511281	0.00307528	0.0964073	-0.00800857	0.0182342
4,6,11,15	-0.00220409	0.00307528	0.473554	-0.0153255	0.0109173
4,6,11,16	0.00219089	0.00307528	0.476208	-0.0109305	0.0153123
4,6,12,13	-0.00155597	0.00307528	0.612887	-0.0146774	0.0115654
4,6,12,14	-0.00371745	0.00307528	0.226737	-0.0168388	0.00940393
4,6,12,15	0.00399719	0.00307528	0.193681	-0.0091242	0.0171186
4,6,12,16	-0.00182532	0.00307528	0.552817	-0.0149467	0.0112961
4,6,13,14	0.00115597	0.00307528	0.706999	-0.0119654	0.0142774
4,6,13,15	-0.00583798	0.00307528	0.0576537	-0.0189594	0.00728341
4,6,13,16	-0.000987711	0.00307528	0.748077	-0.0141091	0.0121337
4,6,14,15	-0.00480882	0.00307528	0.117893	-0.0179302	0.00831256
4,6,14,16	0.00496482	0.00307528	0.10644	-0.00815657	0.0180862
4,6,15,16	-0.00405565	0.00307528	0.187244	-0.017177	0.00906573
4,7,8,9	-0.00695709	0.00307528	0.0236846	-0.0200785	0.0061643
4,7,8,10	-0.00940596	0.00307528	0.00222489	-0.0225273	0.00371543
4,7,8,11	0.0570333	0.00307528	1.41339e-76	0.0439119	0.0701547
4,7,8,12	0.0113447	0.00307528	0.000225321	-0.00177666	0.0244661
4,7,8,13	-3.87767e-05	0.00307528	0.98994	-0.0131602	0.0130826
4,7,8,14	0.00292992	0.00307528	0.340729	-0.0101915	0.0160513
4,7,8,15	0.000485654	0.00307528	0.874519	-0.0126357	0.013607
4,7,8,16	0.0112224	0.00307528	0.000263244	-0.001899	0.0243438
4,7,9,10	-0.00121177	0.00307528	0.693556	-0.0143332	0.0119096
4,7,9,11	0.00368824	0.00307528	0.230409	-0.00943315	0.0168096
4,7,9,12	0.00752419	0.00307528	0.0144211	-0.0055972	0.0206456
4,7,9,13	-0.00259014	0.00307528	0.399654	-0.0157115	0.0105312
4,7,9,14	0.00108157	0.00307528	0.725065	-0.0120398	0.014203
4,7,9,15	0.00572231	0.00307528	0.062785	-0.00739908	0.0188437
4,7,9,16	0.0048708	0.00307528	0.113231	-0.00825058	0.0179922
4,7,10,11	0.0454569	0.00307528	2.33775e-49	0.0323355	0.0585783
4,7,10,12	-0.0135171	0.00307528	1.10754e-05	-0.0266384	-0.000395674
4,7,10,13	-0.00313684	0.00307528	0.307725	-0.0162582	0.00998455
4,7,10,14	-0.0018692	0.00307528	0.543313	-0.0149906	0.0112522
4,7,10,15	0.00421383	0.00307528	0.170621	-0.00890755	0.0173352
4,7,10,16	-0.0235209	0.00307528	2.06423e-14	-0.0366423	-0.0103995
4,7,11,12	0.0136584	0.00307528	8.95453e-06	0.00053703	0.0267798
4,7,11,13	0.00117861	0.00307528	0.701534	-0.0119428	0.0143
4,7,11,14	-0.00199934	0.00307528	0.51561	-0.0151207	0.0111221
4,7,11,15	0.0130824	0.00307528	2.10235e-05	-3.89713e-05	0.0262038
4,7,11,16	0.0161124	0.00307528	1.6167e-07	0.00299105	0.0292338
4,7,12,13	0.00339286	0.00307528	0.269914	-0.00972852	0.0165143
4,7,12,14	0.00643953	0.00307528	0.036267	-0.00668185	0.0195609
4,7,12,15	-0.00292873	0.00307528	0.340925	-0.0160501	0.0101927
4,7,12,16	0.0068311	0.00307528	0.0263345	-0.00629028	0.0199525
4,7,13,14	0.000466103	0.00307528	0.879531	-0.0126553	0.0135875
4,7,13,15	-0.00154225	0.00307528	0.616022	-0.0146636	0.0115791
4,7,13,16	0.000453525	0.00307528	0.882758	-0.0126679	0.0135749
4,7,14,15	-0.00238118	0.00307528	0.438758	-0.0155026	0.0107402
4,7,14,16	-0.00335486	0.00307528	0.275315	-0.0164763	0.00976652
4,7,15,16	0.00368851	0.00307528	0.230375	-0.00943288	0.0168099
4,8,9,10	0.0228282	0.00307528	1.15824e-13	0.00970681	0.0359496
4,8,9,11	0.0232247	0.00307528	4.34187e-14	0.0101033	0.0363461
4,8,9,12	-0.00408742	0.00307528	0.183813	-0.0172088	0.00903397
4,8,9,13	0.000294514	0.00307528	0.923705	-0.0128269	0.0134159
4,8,9,14	0.00330635	0.00307528	0.282317	-0.00981503	0.0164277
4,8,9,15	-0.000922962	0.00307528	0.764084	-0.0140443	0.0121984
4,8,9,16	0.00199158	0.00307528	0.517241	-0.0111298	0.015113
4,8,10,11	0.0243773	0.00307528	2.28429e-15	0.0112559	0.0374987
4,8,10,12	-0.00966588	0.00307528	0.00167253	-0.0227873	0.00345551
4,8,10,13	0.00408033	0.00307528	0.184574	-0.00904106	0.0172017
4,8,10,14	0.00179184	0.00307528	0.560125	-0.0113295	0.0149132
4,8,10,15	0.000763017	0.00307528	0.804048	-0.0123584	0.0138844
4,8,10,16	0.00408663	0.00307528	0.183897	-0.00903476	0.017208
4,8,11,12	0.0289342	0.00307528	5.18749e-21	0.0158129	0.0420556
4,8,11,13	0.00314329	0.00307528	0.306731	-0.0099781	0.0162647
4,8,11,14	0.002651	0.00307528	0.388672	-0.0104704	0.0157724
4,8,11,15	0.0115148	0.00307528	0.000181047	-0.00160657	0.0246362
4,8,11,16	0.0361421	0.00307528	7.4059e-32	0.0230207	0.0492635
4,8,12,13	-0.00277767	0.00307528	0.36641	-0.0158991	0.0103437
4,8,12,14	0.00122563	0.00307528	0.690231	-0.0118958	0.014347
4,8,12,15	0.000552492	0.00307528	0.857423	-0.0125689	0.0136739
4,8,12,16	0.00219935	0.00307528	0.474507	-0.010922	0.0153207
4,8,13,14	7.88881e-05	0.00307528	0.979535	-0.0130425	0.0132003
4,8,13,15	0.000861399	0.00307528	0.779398	-0.01226	0.0139828
4,8,13,16	-0.00456174	0.00307528	0.137985	-0.0176831	0.00855965
4,8,14,15	-0.00862607	0.00307528	0.00503365	-0.0217475	0.00449531
4,8,14,16	-0.000979491	0.00307528	0.750103	-0.0141009	0.0121419
4,8,15,16	0.0155047	0.00307528	4.62663e-07	0.00238329	0.0286261
4,9,10,11	-0.028124	0.00307528	6.12343e-20	-0.0412454	-0.0150027
4,9,10,12	0.00495952	0.00307528	0.106814	-0.00816187	0.0180809
4,9,10,13	-0.00281571	0.00307528	0.359883	-0.0159371	0.0103057
4,9,10,14	0.0010456	0.00307528	0.733856	-0.0120758	0.014167
4,9,10,15	0.000249226	0.00307528	0.935409	-0.0128722	0.0133706
4,9,10,16	-0.00776781	0.00307528	0.0115431	-0.0208892	0.00535358
4,9,11,12	0.00292975	0.00307528	0.340758	-0.0101916	0.0160511
4,9,11,13	-0.000160493	0.00307528	0.958379	-0.0132819	0.0129609
4,9,11,14	-0.00370018	0.00307528	0.228904	-0.0168216	0.00942121
4,9,11,15	0.00605121	0.00307528	0.0491075	-0.00707017	0.0191726
4,9,11,16	-0.00187742	0.00307528	0.541541	-0.0149988	0.011244
4,9,12,13	-0.0023968	0.00307528	0.435762	-0.0155182	0.0107246
4,9,12,14	-0.0032908	0.00307528	0.284587	-0.0164122	0.00983059
4,9,12,15	-0.00213234	0.00307528	0.488073	-0.0152537	0.010989
4,9,12,16	0.00335633	0.00307528	0.275105	-0.00976505	0.0164777
4,9,13,14	-0.000970204	0.00307528	0.752395	-0.0140916	0.0121512
4,9,13,15	0.000691223	0.00307528	0.822161	-0.0124302	0.0138126
4,9,13,16	0.00115717	0.00307528	0.706709	-0.0119642	0.0142786
4,9,14,15	0.00144167	0.00307528	0.63922	-0.0116797	0.0145631
4,9,14,16	0.000248057	0.00307528	0.935711	-0.0128733	0.0133694
4,9,15,16	0.000207092	0.00307528	0.946311	-0.0129143	0.0133285
4,10,11,12	0.0203828	0.00307528	3.43105e-11	0.00726143	0.0335042
4,10,11,13	-0.000838939	0.00307528	0.785007	-0.0139603	0.0122824
4,10,11,14	-0.000163633	0.00307528	0.957565	-0.013285	0.0129578
4,10,11,15	-0.0011608	0.00307528	0.705833	-0.0142822	0.0119606
4,10,11,16	0.0245236	0.00307528	1.55624e-15	0.0114023	0.037645
4,10,12,13	-0.00059336	0.00307528	0.847003	-0.0137147	0.012528
4,10,12,14	-0.00109462	0.00307528	0.721886	-0.014216	0.0120268
4,10,12,15	0.00607435	0.00307528	0.0482479	-0.00704704	0.0191957
4,10,12,16	0.000621301	0.00307528	0.839893	-0.0125001	0.0137427
4,10,13,14	-0.00268048	0.00307528	0.383418	-0.0158019	0.0104409
[truncated: 520 more rows]

## Sheet: G189E
Params:	6885
Performance:	0.981881
Term	Coefficient	Standard Error	p-value	95% CI lower	95% CI upper
Intercept	6.22463
1	0.0377847	0.0595402	0.525686	-0.229329	0.304898
2	-0.19978	0.0599657	0.000864107	-0.468803	0.0692422
3	1.38373	0.0599233	1.95058e-117	1.1149	1.65256
4	-0.290831	0.0602886	1.41083e-06	-0.561302	-0.02036
5	-0.267348	0.0601141	8.71019e-06	-0.537037	0.00234001
6	-0.0200685	0.0595872	0.736275	-0.287393	0.247256
7	-0.522459	0.060063	3.45013e-18	-0.791918	-0.253
8	-0.166286	0.0595429	0.00522861	-0.433412	0.10084
9	-0.0936073	0.0596207	0.11641	-0.361082	0.173867
10	-0.326515	0.0596408	4.40139e-08	-0.594079	-0.0589497
11	1.20084	0.0602861	5.55172e-88	0.930383	1.4713
12	-0.153847	0.0595844	0.00982529	-0.421159	0.113465
13	0.0416672	0.0595879	0.484394	-0.22566	0.308995
14	-0.074516	0.0595469	0.2108	-0.34166	0.192628
15	0.0440508	0.0596452	0.460185	-0.223534	0.311635
16	-0.111861	0.0596023	0.0605515	-0.379253	0.155531
1,2	-0.0469598	0.0589461	0.425653	-0.311408	0.217488
1,3	-0.264006	0.0590286	7.74537e-06	-0.528825	0.000811992
1,4	0.0100271	0.0593029	0.865732	-0.256022	0.276076
1,5	-0.0874547	0.0590822	0.13882	-0.352513	0.177604
1,6	0.0196069	0.0587515	0.738587	-0.243968	0.283182
1,7	-0.0319059	0.0589904	0.588602	-0.296553	0.232741
1,8	-0.0393146	0.0586975	0.502999	-0.302647	0.224018
1,9	-0.00770932	0.05878	0.895653	-0.271412	0.255994
1,10	-0.0195035	0.0588738	0.740437	-0.283628	0.244621
1,11	-0.295109	0.0592876	6.45695e-07	-0.56109	-0.0291288
1,12	0.00920359	0.0587619	0.875541	-0.254418	0.272825
1,13	-0.0563453	0.0588105	0.338025	-0.320185	0.207494
1,14	-0.002588	0.0587911	0.964888	-0.266341	0.261165
1,15	-0.0734433	0.0588252	0.211853	-0.337349	0.190463
1,16	0.05621	0.0588266	0.339318	-0.207702	0.320122
2,3	0.83949	0.0591613	1.26654e-45	0.574077	1.1049
2,4	0.264029	0.0595674	9.3348e-06	-0.00320687	0.531264
2,5	0.104948	0.0593952	0.0772427	-0.161515	0.371411
2,6	0.0252788	0.0590252	0.668455	-0.239524	0.290082
2,7	1.10554	0.0599829	1.23257e-75	0.83644	1.37464
2,8	0.119089	0.0590349	0.0436732	-0.145758	0.383935
2,9	0.0857261	0.0590628	0.146663	-0.179246	0.350698
2,10	0.306435	0.0591226	2.1904e-07	0.0411948	0.571675
2,11	0.70847	0.0594091	9.55982e-33	0.441945	0.974995
2,12	0.17862	0.059035	0.00248196	-0.0862269	0.443468
2,13	-0.0254931	0.0591565	0.666511	-0.290885	0.239899
2,14	0.0332679	0.0589937	0.572809	-0.231394	0.29793
2,15	-0.124261	0.0589807	0.0351387	-0.388865	0.140343
2,16	0.164546	0.0590691	0.00534381	-0.100454	0.429546
3,4	-0.93723	0.0602057	1.57765e-54	-1.20733	-0.667131
3,5	0.58132	0.0592472	1.04432e-22	0.315521	0.847119
3,6	-0.14102	0.0591354	0.0170962	-0.406318	0.124277
3,7	1.57543	0.0591445	2.28066e-155	1.31009	1.84077
3,8	0.724816	0.0588841	8.94995e-35	0.460646	0.988986
3,9	0.330125	0.0590718	2.30031e-08	0.0651129	0.595137
3,10	-0.0770679	0.0594639	0.194965	-0.343839	0.189703
3,11	0.01574	0.0592466	0.790495	-0.250057	0.281537
3,12	0.323004	0.059024	4.45784e-08	0.0582067	0.587802
3,13	-0.0347121	0.0591844	0.557538	-0.30023	0.230805
3,14	0.127597	0.059159	0.0310219	-0.137807	0.393
3,15	-0.168874	0.0591021	0.00427382	-0.434022	0.0962742
3,16	0.443389	0.0591579	6.72501e-14	0.177991	0.708788
4,5	0.472079	0.0600192	3.74144e-15	0.202817	0.741341
4,6	-0.0352288	0.0593377	0.552715	-0.301434	0.230976
4,7	0.710326	0.0595199	8.5857e-33	0.443303	0.977348
4,8	0.279884	0.0593929	2.45375e-06	0.0134313	0.546336
4,9	0.0220073	0.0594643	0.711315	-0.244766	0.28878
4,10	0.392197	0.0593863	4.03263e-11	0.125774	0.658621
4,11	-1.4099	0.0600549	2.66096e-121	-1.67932	-1.14047
4,12	0.0848254	0.0595217	0.154128	-0.182205	0.351856
4,13	-0.0729515	0.0593494	0.219007	-0.339209	0.193306
4,14	0.106324	0.0593651	0.0732961	-0.160004	0.372652
4,15	0.0407861	0.0592795	0.491436	-0.225158	0.30673
4,16	0.155915	0.059456	0.00873478	-0.110821	0.42265
5,6	-0.0610466	0.0591487	0.302035	-0.326404	0.20431
5,7	0.522502	0.0593827	1.41957e-18	0.256095	0.788909
5,8	-0.000174814	0.0591554	0.997642	-0.265562	0.265213
5,9	0.193315	0.0592093	0.00109552	-0.0723143	0.458944
5,10	0.081358	0.0592957	0.170046	-0.184659	0.347375
5,11	0.358796	0.0598218	2.01283e-09	0.0904188	0.627173
5,12	0.135917	0.0592026	0.0216908	-0.129682	0.401516
5,13	0.045814	0.0590892	0.438144	-0.219276	0.310904
5,14	0.129113	0.0591145	0.0289573	-0.13609	0.394317
5,15	0.0553337	0.0591657	0.349673	-0.2101	0.320767
5,16	0.0694989	0.0592183	0.240558	-0.19617	0.335168
6,7	0.0215512	0.0591146	0.715437	-0.243653	0.286756
6,8	-0.0102076	0.0587291	0.862017	-0.273682	0.253267
6,9	0.0516597	0.0588612	0.380135	-0.212408	0.315727
6,10	0.00739915	0.0589965	0.900194	-0.257275	0.272073
6,11	-0.16306	0.0593438	0.00600302	-0.429292	0.103172
6,12	0.0762997	0.0588093	0.194496	-0.187535	0.340134
6,13	-0.0575864	0.0588485	0.327805	-0.321597	0.206424
6,14	0.0606807	0.0588783	0.302727	-0.203464	0.324825
6,15	0.0202225	0.0588757	0.73124	-0.24391	0.284355
6,16	0.00276781	0.058882	0.962509	-0.261393	0.266928
7,8	0.648104	0.0590059	4.88384e-28	0.383387	0.912821
7,9	0.29051	0.0592219	9.34676e-07	0.0248248	0.556196
7,10	0.83317	0.0592744	8.39485e-45	0.567248	1.09909
7,11	1.09983	0.0594356	3.17971e-76	0.833183	1.36647
7,12	0.364935	0.0591759	7.0082e-10	0.0994561	0.630414
7,13	-0.0422713	0.0592436	0.475529	-0.308054	0.223512
7,14	0.0435239	0.05904	0.461008	-0.221346	0.308393
7,15	-0.043465	0.0590964	0.462043	-0.308588	0.221658
7,16	0.348258	0.0592773	4.25016e-09	0.0823239	0.614192
8,9	0.0586191	0.058801	0.318814	-0.205178	0.322416
8,10	0.128525	0.0589385	0.0292125	-0.135889	0.392939
8,11	1.12157	0.0591384	5.84273e-80	0.85626	1.38688
8,12	0.0197049	0.0587535	0.737338	-0.243879	0.283289
8,13	-0.0147788	0.0587245	0.801302	-0.278233	0.248675
8,14	0.0702179	0.0587113	0.231707	-0.193177	0.333613
8,15	-0.0901541	0.0587518	0.124914	-0.353731	0.173422
8,16	0.00604265	0.0588202	0.918177	-0.257841	0.269926
9,10	0.210741	0.0588855	0.000345439	-0.0534359	0.474917
9,11	0.10512	0.059166	0.0756238	-0.160315	0.370555
9,12	0.0454984	0.0587734	0.438856	-0.218175	0.309172
9,13	-0.0605281	0.058818	0.303449	-0.324402	0.203345
9,14	-0.0248383	0.0588019	0.672729	-0.288639	0.238963
9,15	-0.0558615	0.0588506	0.342518	-0.319881	0.208158
9,16	-0.00616579	0.0589541	0.916705	-0.27065	0.258318
10,11	0.919688	0.059137	2.00207e-54	0.654383	1.18499
10,12	0.175686	0.0589405	0.00287677	-0.0887371	0.440109
10,13	0.0924577	0.0590163	0.117203	-0.172306	0.357221
10,14	0.0998989	0.0589192	0.0899816	-0.164429	0.364226
10,15	-0.0318873	0.0590163	0.588983	-0.296651	0.232876
10,16	0.0846705	0.059025	0.151439	-0.180132	0.349473
11,12	0.273961	0.0591532	3.64048e-06	0.00858326	0.539338
11,13	-0.0514447	0.0592781	0.385478	-0.317382	0.214493
11,14	0.0580806	0.05923	0.326797	-0.207641	0.323803
11,15	-0.366224	0.0594334	7.23473e-10	-0.632859	-0.0995896
11,16	0.192171	0.0592278	0.00117684	-0.0735416	0.457883
12,13	-0.0783313	0.0587797	0.182661	-0.342033	0.185371
12,14	0.0281639	0.0587395	0.631605	-0.235357	0.291685
12,15	0.130994	0.0588019	0.0259036	-0.132808	0.394795
12,16	0.0180811	0.058851	0.758665	-0.245941	0.282103
13,14	0.0517546	0.0587829	0.378627	-0.211961	0.31547
13,15	-0.118315	0.0588471	0.0443787	-0.382319	0.14569
13,16	-0.031162	0.058851	0.596456	-0.295184	0.23286
14,15	0.0117065	0.0588211	0.842249	-0.252181	0.275594
14,16	0.0403983	0.0588374	0.492331	-0.223562	0.304359
15,16	-0.134972	0.058868	0.0218635	-0.39907	0.129126
1,2,3	0.269543	0.0523257	2.59613e-07	0.0347955	0.50429
1,2,4	0.113906	0.0525635	0.0302376	-0.121908	0.34972
1,2,5	0.166454	0.0524638	0.00151087	-0.0689128	0.401821
1,2,6	-0.0688018	0.0522773	0.188148	-0.303332	0.165728
1,2,7	0.11084	0.0526127	0.0351463	-0.125195	0.346875
1,2,8	0.0815941	0.0522488	0.118377	-0.152808	0.315996
1,2,9	0.0537059	0.0522389	0.303916	-0.180652	0.288064
1,2,10	0.0536206	0.0523434	0.30565	-0.181206	0.288447
1,2,11	0.335195	0.0523956	1.59289e-10	0.100134	0.570255
1,2,12	-0.0392489	0.0522346	0.452418	-0.273588	0.19509
1,2,13	0.0324028	0.0523097	0.535628	-0.202273	0.267078
1,2,14	0.000905559	0.0522388	0.986169	-0.233452	0.235263
1,2,15	0.038716	0.0522429	0.458651	-0.19566	0.273092
1,2,16	-0.113014	0.052274	0.0306261	-0.347529	0.121502
1,3,4	0.0435025	0.0528739	0.410649	-0.193704	0.280709
1,3,5	0.155265	0.0524237	0.00306043	-0.0799221	0.390452
1,3,6	0.0305978	0.0523294	0.558741	-0.204166	0.265362
1,3,7	0.103194	0.0523279	0.0486067	-0.131563	0.337951
1,3,8	0.0683782	0.052226	0.190447	-0.165922	0.302678
1,3,9	0.00498046	0.0523025	0.924137	-0.229663	0.239624
1,3,10	-0.0389333	0.0525022	0.458359	-0.274472	0.196606
1,3,11	0.304587	0.0523892	6.13467e-09	0.0695551	0.53962
1,3,12	-0.00726807	0.052258	0.889387	-0.241712	0.227176
1,3,13	0.0178657	0.0523413	0.732857	-0.216952	0.252683
1,3,14	-0.00607725	0.0523229	0.907535	-0.240812	0.228657
1,3,15	0.137453	0.0522961	0.00858205	-0.0971616	0.372068
1,3,16	-0.0285462	0.0523669	0.585674	-0.263478	0.206386
1,4,5	-0.164235	0.0527773	0.0018601	-0.401008	0.0725382
1,4,6	0.00463912	0.0525356	0.929635	-0.23105	0.240328
1,4,7	-0.0141051	0.052564	0.788437	-0.249921	0.221711
1,4,8	-0.103001	0.0525205	0.0498647	-0.338622	0.13262
1,4,9	-0.0587036	0.052552	0.263975	-0.294466	0.177059
1,4,10	0.056393	0.0525594	0.283303	-0.179403	0.292189
1,4,11	0.254518	0.0528288	1.45531e-06	0.0175136	0.491523
1,4,12	-0.018746	0.0525756	0.721428	-0.254614	0.217122
1,4,13	0.0205128	0.0525612	0.696342	-0.215291	0.256317
1,4,14	-0.0327037	0.0525323	0.533586	-0.268378	0.202971
1,4,15	0.0217857	0.0524883	0.678101	-0.213691	0.257263
1,4,16	-0.0881802	0.0526242	0.0938108	-0.324267	0.147906
1,5,6	0.051006	0.0523882	0.330251	-0.184022	0.286034
1,5,7	0.097376	0.0524586	0.0634237	-0.137967	0.332719
1,5,8	-0.00357017	0.0523256	0.945603	-0.238317	0.231177
1,5,9	0.00163236	0.0523356	0.975118	-0.233159	0.236424
1,5,10	0.0492353	0.0524369	0.347763	-0.186011	0.284481
1,5,11	0.0783133	0.0525297	0.13601	-0.157349	0.313976
1,5,12	0.114553	0.0523457	0.0286457	-0.120285	0.34939
1,5,13	0.0545571	0.0523598	0.297432	-0.180343	0.289457
1,5,14	-0.0462697	0.0523209	0.376514	-0.280996	0.188456
1,5,15	0.0256118	0.0523311	0.624547	-0.20916	0.260383
1,5,16	-0.0566835	0.0523989	0.27936	-0.291759	0.178392
1,6,7	-0.0313806	0.0523244	0.548688	-0.266122	0.203361
1,6,8	0.0310868	0.0521339	0.550986	-0.2028	0.264974
1,6,9	0.0393259	0.0521865	0.451114	-0.194797	0.273449
1,6,10	-0.055174	0.0523079	0.291525	-0.289841	0.179493
1,6,11	0.0100845	0.0523804	0.847333	-0.224908	0.245077
1,6,12	-0.0226818	0.0521473	0.663596	-0.256629	0.211265
1,6,13	0.0516476	0.0522291	0.322732	-0.182666	0.285961
1,6,14	-0.0278968	0.0521967	0.593029	-0.262065	0.206272
1,6,15	-0.0127096	0.0521947	0.807616	-0.246869	0.22145
1,6,16	-0.0275549	0.0522489	0.597934	-0.261958	0.206848
1,7,8	0.0379531	0.0522558	0.467661	-0.196481	0.272387
1,7,9	-0.0153365	0.0523123	0.769392	-0.250024	0.219351
1,7,10	-0.0277348	0.0524188	0.596738	-0.2629	0.20743
1,7,11	0.033444	0.0524297	0.523552	-0.20177	0.268658
1,7,12	-0.0949009	0.0523031	0.0696152	-0.329547	0.139745
1,7,13	0.0544178	0.0523638	0.298704	-0.180501	0.289336
1,7,14	0.0144618	0.0522936	0.782127	-0.220142	0.249065
1,7,15	0.103658	0.0523306	0.0476149	-0.131111	0.338428
1,7,16	-0.123108	0.0523722	0.018745	-0.358063	0.111848
1,8,9	-0.00774738	0.0521434	0.881887	-0.241677	0.226182
1,8,10	0.0932097	0.0522682	0.0745435	-0.14128	0.327699
1,8,11	0.0194799	0.0522657	0.709366	-0.214998	0.253958
1,8,12	-0.00396319	0.0521256	0.939394	-0.237813	0.229886
1,8,13	0.0227515	0.0521388	0.662574	-0.211157	0.25666
1,8,14	-0.0147806	0.0521034	0.776658	-0.248531	0.21897
1,8,15	0.0444348	0.0521191	0.393905	-0.189386	0.278255
1,8,16	-0.0300982	0.0521691	0.563985	-0.264143	0.203947
1,9,10	-0.0270086	0.052235	0.605116	-0.261349	0.207332
1,9,11	0.09086	0.0523186	0.082451	-0.143855	0.325575
1,9,12	-0.0480937	0.0521314	0.356247	-0.281969	0.185782
1,9,13	0.0215821	0.0521815	0.679171	-0.212518	0.255683
1,9,14	0.0357669	0.0521486	0.492801	-0.198186	0.26972
1,9,15	0.0209208	0.0521696	0.688411	-0.213126	0.254968
1,9,16	0.0143168	0.0522305	0.784002	-0.220004	0.248637
1,10,11	0.193846	0.0523436	0.000212977	-0.0409813	0.428674
1,10,12	-0.0342165	0.0522443	0.512514	-0.268599	0.200166
1,10,13	-0.0936714	0.0522955	0.0732676	-0.328283	0.140941
1,10,14	-0.0576682	0.0522418	0.269654	-0.292039	0.176703
1,10,15	0.0726527	0.0522796	0.164626	-0.161888	0.307193
1,10,16	-0.0410305	0.0523213	0.432925	-0.275758	0.193697
1,11,12	0.11533	0.0523029	0.0274558	-0.119316	0.349975
1,11,13	0.00764661	0.0524097	0.884	-0.227477	0.242771
1,11,14	0.0525746	0.0523555	0.315294	-0.182306	0.287456
1,11,15	-0.139778	0.0523732	0.00761256	-0.374738	0.0951824
1,11,16	0.102762	0.0523712	0.0497458	-0.132189	0.337713
1,12,13	0.0861412	0.0521681	0.0986989	-0.147899	0.320182
1,12,14	0.0359035	0.0521229	0.490937	-0.197934	0.269741
1,12,15	0.0303197	0.0521535	0.561004	-0.203655	0.264294
1,12,16	-0.0432653	0.0522083	0.407275	-0.277486	0.190955
1,13,14	0.0198583	0.0521911	0.703582	-0.214285	0.254002
1,13,15	-0.0112871	0.052177	0.828737	-0.245367	0.222793
1,13,16	0.0390466	0.0522271	0.454686	-0.195258	0.273352
1,14,15	0.00396206	0.05215	0.93944	-0.229997	0.237921
1,14,16	-0.0192556	0.0521921	0.712176	-0.253404	0.214892
1,15,16	0.040733	0.0522142	0.435328	-0.193514	0.27498
2,3,4	-0.108152	0.0528628	0.0407703	-0.345309	0.129005
2,3,5	-0.352884	0.0525381	1.87591e-11	-0.588585	-0.117184
2,3,6	0.0297966	0.0523896	0.569528	-0.205237	0.26483
2,3,7	-1.24114	0.0525883	1.46291e-122	-1.47706	-1.00521
2,3,8	-0.237883	0.0523016	5.41958e-06	-0.472522	-0.00324344
2,3,9	-0.0987782	0.052339	0.0591282	-0.333585	0.136029
2,3,10	-0.41441	0.0525566	3.20026e-15	-0.650193	-0.178627
2,3,11	-1.00749	0.0524445	5.49633e-82	-1.24277	-0.772206
2,3,12	-0.251159	0.0523188	1.58627e-06	-0.485875	-0.0164429
2,3,13	-0.0710487	0.0524138	0.175253	-0.306191	0.164094
2,3,14	-0.073263	0.0523678	0.161815	-0.308199	0.161673
2,3,15	0.0485043	0.0523323	0.354007	-0.186273	0.283281
2,3,16	-0.280724	0.0523798	8.38242e-08	-0.515714	-0.0457341
2,4,5	0.875115	0.0528782	2.24173e-61	0.637889	1.11234
2,4,6	-0.00977401	0.0526129	0.852624	-0.24581	0.226262
2,4,7	-1.34004	0.0528268	3.58443e-141	-1.57704	-1.10305
2,4,8	-0.212061	0.052588	5.52589e-05	-0.447985	0.0238631
2,4,9	-0.0753721	0.0526016	0.151896	-0.311357	0.160613
2,4,10	-0.4806	0.0526397	7.06713e-20	-0.716756	-0.244444
2,4,11	-0.0121041	0.0528625	0.818891	-0.24926	0.225051
2,4,12	-0.0858981	0.0526193	0.102591	-0.321963	0.150166
2,4,13	0.0908916	0.0526554	0.0843242	-0.145335	0.327118
2,4,14	-0.0585603	0.0525841	0.265433	-0.294467	0.177346
2,4,15	0.0292417	0.0525305	0.577761	-0.206425	0.264908
2,4,16	-0.17952	0.0526197	0.000646154	-0.415586	0.0565462
2,5,6	-0.0419658	0.0525523	0.424553	-0.27773	0.193798
2,5,7	-0.623652	0.0529067	4.9184e-32	-0.861006	-0.386298
2,5,8	0.156046	0.052533	0.00297493	-0.0796309	0.391723
2,5,9	-0.0773399	0.0524813	0.140577	-0.312785	0.158105
2,5,10	-0.0791599	0.0526224	0.13251	-0.315239	0.156919
2,5,11	-0.258994	0.0526536	8.73067e-07	-0.495212	-0.0227755
2,5,12	-0.11554	0.0525062	0.0277756	-0.351097	0.120017
2,5,13	-0.0108279	0.052523	0.83667	-0.24646	0.224805
2,5,14	0.0463137	0.0524971	0.377665	-0.189203	0.28183
2,5,15	0.0219079	0.0524525	0.67619	-0.213408	0.257224
2,5,16	-0.00450155	0.0525317	0.931712	-0.240173	0.23117
2,6,7	-0.00718941	0.0526675	0.891422	-0.24347	0.229091
2,6,8	0.0193286	0.0522966	0.711685	-0.215288	0.253945
2,6,9	-0.0259412	0.0523074	0.61994	-0.260607	0.208724
2,6,10	0.0119722	0.0524286	0.819373	-0.223237	0.247181
2,6,11	0.0165632	0.0524306	0.752074	-0.218655	0.251781
2,6,12	-0.034854	0.0522709	0.504906	-0.269356	0.199648
2,6,13	0.000200316	0.0523691	0.996948	-0.234742	0.235142
2,6,14	-0.000524864	0.0523193	0.991996	-0.235243	0.234194
2,6,15	-0.0162638	0.0522803	0.755734	-0.250807	0.21828
2,6,16	-0.017993	0.0523305	0.730972	-0.252762	0.216776
2,7,8	-0.243902	0.0526303	3.59037e-06	-0.480015	-0.00778777
2,7,9	0.0961668	0.05264	0.0677236	-0.139991	0.332324
2,7,10	-0.147647	0.0526943	0.00508107	-0.384048	0.0887537
2,7,11	-1.20657	0.0527093	1.90368e-115	-1.44303	-0.970098
2,7,12	-0.046471	0.0526588	0.377515	-0.282713	0.189771
2,7,13	-0.000238587	0.0527562	0.996392	-0.236917	0.23644
2,7,14	0.135044	0.0526321	0.0102958	-0.101078	0.371166
2,7,15	-0.348959	0.0526228	3.35615e-11	-0.58504	-0.112879
2,7,16	0.305403	0.0526682	6.72152e-09	0.069119	0.541687
2,8,9	-0.0359911	0.0522869	0.491243	-0.270565	0.198582
2,8,10	0.0301591	0.0524651	0.565401	-0.205214	0.265532
2,8,11	-0.226504	0.0523667	1.52548e-05	-0.461436	0.00842694
2,8,12	0.0616345	0.0522771	0.238405	-0.172895	0.296164
2,8,13	0.0172303	0.052307	0.741849	-0.217433	0.251894
2,8,14	-0.0322518	0.0522372	0.536967	-0.266602	0.202099
2,8,15	0.0342607	0.0522317	0.511868	-0.200065	0.268586
2,8,16	-0.0384912	0.0522808	0.461588	-0.273037	0.196055
2,9,10	-0.189386	0.0523564	0.000298008	-0.424271	0.0454989
2,9,11	-0.0983853	0.0523634	0.0602641	-0.333302	0.136531
2,9,12	-0.0754314	0.0522408	0.148768	-0.309798	0.158935
2,9,13	0.0420207	0.0523088	0.421793	-0.192651	0.276692
2,9,14	0.0524655	0.0522577	0.315394	-0.181977	0.286908
2,9,15	0.0109517	0.0522533	0.833989	-0.223471	0.245374
2,9,16	-0.0829256	0.0523095	0.112907	-0.3176	0.151749
2,10,11	-0.243365	0.0524115	3.43561e-06	-0.478498	-0.00823293
2,10,12	-0.0656386	0.052362	0.210009	-0.300549	0.169272
2,10,13	-0.0901506	0.0524291	0.0855332	-0.325362	0.145061
2,10,14	-0.0405228	0.0523477	0.43887	-0.275369	0.194323
2,10,15	0.0788055	0.0523616	0.132323	-0.156103	0.313714
2,10,16	-0.172935	0.0524046	0.000967452	-0.408036	0.0621663
2,11,12	-0.168909	0.0523671	0.00125832	-0.403842	0.0660239
2,11,13	0.040898	0.0524833	0.435831	-0.194556	0.276352
2,11,14	-0.103899	0.05239	0.0473513	-0.338935	0.131137
2,11,15	0.218853	0.0523933	2.95663e-05	-0.0161975	0.453903
2,11,16	0.00923936	0.052394	0.860025	-0.225815	0.244293
2,12,13	-0.0271817	0.0523025	0.603273	-0.261825	0.207462
2,12,14	0.0106355	0.0522247	0.838629	-0.223659	0.24493
2,12,15	-0.1521	0.052254	0.0036066	-0.386526	0.0823255
2,12,16	-0.0641277	0.0522873	0.220035	-0.298703	0.170447
2,13,14	-0.0453693	0.0523108	0.38578	-0.28005	0.189311
2,13,15	0.138781	0.0522906	0.00795585	-0.095809	0.373371
2,13,16	0.0236896	0.0523225	0.650723	-0.211043	0.258422
2,14,15	-0.023075	0.0522338	0.658663	-0.25741	0.21126
2,14,16	0.00995357	0.0522581	0.848942	-0.224491	0.244398
2,15,16	0.203663	0.0522614	9.75019e-05	-0.0307961	0.438122
3,4,5	1.31504	0.0529562	2.10333e-135	1.07746	1.55261
3,4,6	0.232787	0.0528946	1.07971e-05	-0.00451282	0.470086
3,4,7	-0.195034	0.0528054	0.000221446	-0.431933	0.0418657
3,4,8	0.0859717	0.0528179	0.103594	-0.150984	0.322927
3,4,9	-0.171679	0.0529278	0.00118083	-0.409127	0.0657701
3,4,10	-0.782844	0.0530346	3.22303e-49	-1.02077	-0.544916
3,4,11	1.63308	0.0529614	4.50461e-207	1.39548	1.87068
3,4,12	0.068473	0.0528741	0.195319	-0.168735	0.305681
3,4,13	0.033035	0.0529106	0.532397	-0.204336	0.270406
3,4,14	-0.127486	0.0528995	0.0159573	-0.364807	0.109836
3,4,15	-0.0467045	0.0528367	0.376732	-0.283744	0.190335
3,4,16	-0.0223484	0.0529674	0.673079	-0.259975	0.215278
3,5,6	0.0905577	0.0524905	0.0844933	-0.144929	0.326045
3,5,7	-0.632153	0.0524709	2.18995e-33	-0.867552	-0.396755
3,5,8	-0.0930949	0.0523768	0.0755068	-0.328072	0.141882
3,5,9	-0.111458	0.0524204	0.0334885	-0.34663	0.123715
3,5,10	-0.531386	0.0526708	6.48395e-24	-0.767682	-0.295091
3,5,11	-0.973042	0.0525744	2.98717e-76	-1.20891	-0.737179
3,5,12	-0.108876	0.0524098	0.0377695	-0.344001	0.126249
3,5,13	0.0274535	0.0524577	0.600737	-0.207886	0.262793
3,5,14	-0.0953599	0.0524398	0.0689987	-0.330619	0.1399
3,5,15	0.0304588	0.0524097	0.561129	-0.204665	0.265583
3,5,16	-0.0937539	0.0524964	0.0741191	-0.329267	0.141759
3,6,7	0.0117964	0.0523807	0.821821	-0.223198	0.24679
3,6,8	-0.0121874	0.0522561	0.815588	-0.246622	0.222248
3,6,9	-0.0629806	0.0523545	0.228995	-0.297857	0.171896
3,6,10	-0.0388295	0.052584	0.460258	-0.274736	0.197077
3,6,11	0.278938	0.0524136	1.03101e-07	0.043796	0.514079
3,6,12	-0.0877061	0.0522835	0.0934485	-0.322264	0.146852
3,6,13	0.0886614	0.0523969	0.0906301	-0.146405	0.323728
3,6,14	-0.0207805	0.0523797	0.69157	-0.25577	0.214209
3,6,15	0.0435487	0.0523373	0.405369	-0.191251	0.278348
3,6,16	-0.0446547	0.0524021	0.394132	-0.279745	0.190435
3,7,8	-1.03597	0.0522675	3.8925e-87	-1.27046	-0.801488
3,7,9	-0.370538	0.0523527	1.48236e-12	-0.605406	-0.135669
3,7,10	-0.729765	0.0525556	9.13231e-44	-0.965544	-0.493986
3,7,11	-1.87861	0.0524262	4.19755e-278	-2.11381	-1.64342
3,7,12	-0.406787	0.0523312	7.77274e-15	-0.641559	-0.172015
3,7,13	-0.00547885	0.0524133	0.916748	-0.240619	0.229661
3,7,14	-0.00715276	0.0523538	0.891329	-0.242026	0.227721
3,7,15	-0.0526565	0.0523564	0.314549	-0.287542	0.182229
3,7,16	-0.385225	0.0524236	2.03409e-13	-0.620411	-0.150038
3,8,9	-0.282994	0.0522467	6.10224e-08	-0.517387	-0.0486013
3,8,10	-0.123269	0.0524699	0.0188107	-0.358663	0.112125
3,8,11	-1.14065	0.0522939	4.79042e-105	-1.37525	-0.906041
3,8,12	-0.151296	0.0521892	0.00374498	-0.385431	0.0828385
3,8,13	-0.0638744	0.0522509	0.22154	-0.298286	0.170537
3,8,14	-0.0597009	0.0522295	0.253023	-0.294017	0.174615
3,8,15	-0.0217494	0.0522231	0.677067	-0.256036	0.212538
3,8,16	-0.0667722	0.0522685	0.201436	-0.301263	0.167718
3,9,10	0.16533	0.0524757	0.00163026	-0.070091	0.40075
3,9,11	-0.314963	0.0523452	1.78721e-09	-0.549798	-0.0801281
3,9,12	-0.175463	0.0522468	0.000784601	-0.409856	0.0589302
3,9,13	0.0188665	0.0523286	0.718445	-0.215894	0.253627
3,9,14	-0.0408501	0.0523093	0.434845	-0.275524	0.193824
3,9,15	-0.0876369	0.052306	0.0938487	-0.322296	0.147022
3,9,16	-0.0914752	0.0523706	0.0806965	-0.326424	0.143473
3,10,11	-0.110292	0.0525071	0.0356871	-0.345853	0.125269
3,10,12	0.11906	0.0524608	0.0232419	-0.116294	0.354413
3,10,13	-0.0269202	0.052581	0.608669	-0.262813	0.208972
3,10,14	-0.0202745	0.0525201	0.699474	-0.255894	0.215345
3,10,15	0.268366	0.0525278	3.24872e-07	0.0327117	0.50402
3,10,16	-0.140827	0.0525868	0.0074087	-0.376745	0.0950918
3,11,12	-0.285339	0.0523214	4.95678e-08	-0.520067	-0.0506114
3,11,13	0.0256751	0.0524313	0.624356	-0.209546	0.260896
3,11,14	-0.110077	0.0523853	0.0356192	-0.345092	0.124938
3,11,15	0.239926	0.0523978	4.68321e-06	0.00485567	0.474997
3,11,16	-0.406904	0.0524139	8.41299e-15	-0.642047	-0.171761
3,12,13	0.0304115	0.0522892	0.560836	-0.204172	0.264995
3,12,14	-0.0787639	0.0522538	0.131731	-0.313189	0.155661
3,12,15	-0.234419	0.0522496	7.25346e-06	-0.468825	-1.33544e-05
3,12,16	-0.102632	0.0523245	0.0498312	-0.337374	0.13211
3,13,14	-0.0130888	0.0523635	0.80262	-0.248006	0.221828
3,13,15	0.133207	0.0523233	0.010904	-0.10153	0.367944
3,13,16	0.00640053	0.0523857	0.902756	-0.228616	0.241417
3,14,15	-0.0208152	0.0523027	0.69065	-0.255459	0.213829
3,14,16	-0.0445437	0.0523581	0.394911	-0.279436	0.190349
3,15,16	0.375235	0.0523523	7.73034e-13	0.140368	0.610102
4,5,6	-0.0499278	0.052819	0.344529	-0.286888	0.187033
4,5,7	1.02077	0.0527952	5.0829e-83	0.783917	1.25762
4,5,8	0.223508	0.0528034	2.31123e-05	-0.0133822	0.460398
4,5,9	0.243531	0.0528152	4.01595e-06	0.00658783	0.480475
4,5,10	1.11315	0.0528106	3.00249e-98	0.876226	1.35007
4,5,11	2.73761	0.0529468	0	2.50008	2.97514
4,5,12	-0.0778587	0.0528806	0.140932	-0.315095	0.159378
4,5,13	-0.0264463	0.0527796	0.616323	-0.26323	0.210337
4,5,14	-0.0823137	0.0527659	0.11877	-0.319036	0.154408
4,5,15	-0.184293	0.0527164	0.000472778	-0.420793	0.0522075
4,5,16	0.356697	0.0528816	1.54273e-11	0.119456	0.593939
4,6,7	-0.0253826	0.0525821	0.629294	-0.26128	0.210515
4,6,8	-0.047972	0.0525196	0.36103	-0.283589	0.187645
4,6,9	0.0104176	0.0525764	0.842935	-0.225454	0.24629
4,6,10	0.0777402	0.0525894	0.139347	-0.15819	0.313671
4,6,11	0.072141	0.0528043	0.171883	-0.164753	0.309035
4,6,12	-0.0609183	0.05255	0.246361	-0.296672	0.174835
4,6,13	0.0480159	0.0525865	0.361203	-0.187902	0.283933
4,6,14	-0.0241404	0.0525662	0.646065	-0.259966	0.211686
4,6,15	0.00529242	0.0524968	0.919698	-0.230223	0.240807
4,6,16	0.000167179	0.0526149	0.997465	-0.235878	0.236212
4,7,8	-0.963348	0.0525451	7.31525e-75	-1.19908	-0.727617
4,7,9	-0.212941	0.0525938	5.15506e-05	-0.448891	0.0230087
4,7,10	-1.19683	0.0526473	6.80544e-114	-1.43302	-0.960643
4,7,11	0.121229	0.0528399	0.0217788	-0.115825	0.358283
4,7,12	-0.242624	0.0526103	4.00224e-06	-0.478648	-0.00659966
4,7,13	0.12846	0.05263	0.0146572	-0.107653	0.364573
4,7,14	-0.0765108	0.0525668	0.145537	-0.31234	0.159318
4,7,15	-0.0472322	0.0525457	0.368722	-0.282967	0.188502
4,7,16	-0.526082	0.0526528	1.73568e-23	-0.762296	-0.289867
4,8,9	0.0147791	0.0525418	0.778495	-0.220938	0.250496
4,8,10	-0.353423	0.0525988	1.84423e-11	-0.589395	-0.11745
4,8,11	0.431292	0.0527406	2.95447e-16	0.194683	0.667901
4,8,12	0.0425448	0.052541	0.41809	-0.193168	0.278258
4,8,13	-0.0158301	0.0525151	0.763081	-0.251427	0.219767
4,8,14	0.0257389	0.0524857	0.623855	-0.209726	0.261204
4,8,15	0.0224501	0.0524549	0.668661	-0.212877	0.257777
4,8,16	-0.0700856	0.0525719	0.182492	-0.305938	0.165766
4,9,10	-0.0206907	0.0525684	0.693881	-0.256527	0.215146
4,9,11	0.188317	0.0527655	0.000358731	-0.0484038	0.425037
4,9,12	0.0615141	0.0525632	0.24189	-0.174299	0.297327
4,9,13	0.0513997	0.0525671	0.328181	-0.18443	0.28723
4,9,14	-0.0348073	0.0525474	0.50772	-0.270549	0.200935
4,9,15	0.00515455	0.0525052	0.921796	-0.230398	0.240707
4,9,16	0.115762	0.0526353	0.0278591	-0.120374	0.351898
4,10,11	-0.265779	0.0527507	4.7087e-07	-0.502433	-0.0291252
4,10,12	-0.131307	0.0526205	0.0125859	-0.367377	0.104763
4,10,13	-0.0200256	0.0525918	0.703373	-0.255967	0.215916
4,10,14	-0.0802128	0.052547	0.126892	-0.315953	0.155527
4,10,15	0.0269843	0.0525366	0.607515	-0.208709	0.262678
4,10,16	-0.275925	0.0526661	1.619e-07	-0.512199	-0.0396506
4,11,12	0.180164	0.0528022	0.000645205	-0.0567211	0.417049
4,11,13	0.0290675	0.0528582	0.582379	-0.208069	0.266204
4,11,14	0.120309	0.0527926	0.0226768	-0.116533	0.357151
4,11,15	0.117307	0.0527584	0.0261874	-0.119381	0.353996
4,11,16	-0.148693	0.0528254	0.00488242	-0.385682	0.0882961
4,12,13	0.042979	0.0525786	0.41369	-0.192903	0.278861
4,12,14	-0.0966475	0.0525379	0.0658354	-0.332347	0.139052
4,12,15	-0.13971	0.05251	0.00780156	-0.375284	0.0958642
4,12,16	0.0923744	0.052651	0.079356	-0.143832	0.328581
4,13,14	-0.0527705	0.0525671	0.315446	-0.288601	0.18306
4,13,15	0.138711	0.0524886	0.00822734	-0.0967671	0.374189
4,13,16	0.06161	0.0526141	0.241612	-0.174431	0.297651
4,14,15	-0.0582788	0.0524662	0.266665	-0.293657	0.177099
4,14,16	-0.0400816	0.0525815	0.445898	-0.275976	0.195813
4,15,16	0.128583	0.0525466	0.0144073	-0.107156	0.364321
5,6,7	0.0222747	0.0525198	0.671479	-0.213343	0.257893
5,6,8	0.120968	0.0523844	0.0209336	-0.114042	0.355979
5,6,9	-0.0429927	0.0524075	0.412018	-0.278107	0.192122
5,6,10	0.154859	0.0525315	0.0032004	-0.0808115	0.39053
5,6,11	-0.078116	0.0525611	0.137233	-0.31392	0.157688
5,6,12	-0.0155198	0.0523691	0.766962	-0.250462	0.219422
5,6,13	0.0397579	0.0524177	0.448165	-0.195402	0.274918
5,6,14	-0.0608905	0.0523973	0.245203	-0.295959	0.174178
5,6,15	-0.0114561	0.0523797	0.826875	-0.246446	0.223534
5,6,16	-0.000832041	0.0524571	0.987345	-0.236169	0.234505
5,7,8	-0.414043	0.0524626	3.02284e-15	-0.649405	-0.178681
5,7,9	-0.309948	0.0524914	3.55191e-09	-0.545439	-0.0744576
5,7,10	0.970726	0.0525701	6.54006e-76	0.734883	1.20657
5,7,11	-0.783926	0.0526196	4.22176e-50	-1.01999	-0.54786
5,7,12	-0.200569	0.0525117	0.000133859	-0.43615	0.0350129
5,7,13	-0.00357374	0.0525103	0.94574	-0.239149	0.232002
5,7,14	0.0259328	0.0524739	0.621164	-0.209479	0.261345
5,7,15	-0.0412656	0.0524676	0.43158	-0.27665	0.194118
5,7,16	-0.16526	0.0525717	0.00167018	-0.401111	0.070591
5,8,9	-0.0815023	0.0523606	0.119581	-0.316406	0.153402
5,8,10	0.497051	0.0525147	3.04303e-21	0.261456	0.732646
5,8,11	-0.333691	0.0524759	2.04684e-10	-0.569113	-0.0982701
5,8,12	0.112047	0.0523625	0.0323722	-0.122865	0.34696
5,8,13	-0.0359764	0.0523275	0.491756	-0.270732	0.198779
5,8,14	-0.0446384	0.0522983	0.393367	-0.279263	0.189986
5,8,15	0.0324614	0.0523024	0.534834	-0.202182	0.267104
5,8,16	0.093503	0.0523807	0.0742558	-0.141491	0.328497
5,9,10	0.0396785	0.0524205	0.449097	-0.195494	0.274851
5,9,11	-0.134657	0.0524893	0.0103077	-0.370139	0.100824
5,9,12	-0.108273	0.0523366	0.0385704	-0.343069	0.126523
5,9,13	-0.0963256	0.0523469	0.0657529	-0.331168	0.138517
5,9,14	-0.0462562	0.0523218	0.376662	-0.280986	0.188474
5,9,15	-0.10364	0.0523225	0.0476205	-0.338373	0.131094
5,9,16	-0.0637566	0.0524201	0.22389	-0.298927	0.171414
5,10,11	0.315816	0.0525223	1.83246e-09	0.0801863	0.551445
5,10,12	0.0287335	0.0524485	0.583802	-0.206565	0.264032
5,10,13	-0.0430381	0.0524712	0.412092	-0.278438	0.192362
5,10,14	-0.0622032	0.0524172	0.235353	-0.297361	0.172955
5,10,15	0.0201284	0.0524586	0.701202	-0.215215	0.255472
5,10,16	0.0158598	0.0524964	0.762568	-0.219653	0.251373
5,11,12	-0.260984	0.0524948	6.65891e-07	-0.49649	-0.0254781
5,11,13	0.0599882	0.0525302	0.253469	-0.175677	0.295653
5,11,14	-0.0671823	0.0524955	0.200631	-0.302692	0.168327
5,11,15	-0.102624	0.0525201	0.0507075	-0.338243	0.132996
5,11,16	-0.021708	0.0525371	0.679466	-0.257404	0.213988
5,12,13	0.0124615	0.0523513	0.811855	-0.222401	0.247323
5,12,14	-0.0194524	0.0523091	0.709988	-0.254125	0.215221
5,12,15	-0.0588891	0.0523397	0.260538	-0.293699	0.175921
5,12,16	-0.0568822	0.0524104	0.277783	-0.29201	0.178245
5,13,14	-0.0595262	0.0523489	0.255499	-0.294377	0.175325
5,13,15	-0.00975562	0.052324	0.852095	-0.244495	0.224984
5,13,16	-0.0284655	0.0523871	0.586879	-0.263488	0.206557
5,14,15	-0.0453307	0.0523041	0.386123	-0.279981	0.189319
5,14,16	-0.105811	0.0523649	0.0433216	-0.340734	0.129112
5,15,16	0.133569	0.0523748	0.010767	-0.101399	0.368537
6,7,8	-0.00699645	0.0522915	0.893563	-0.24159	0.227597
6,7,9	-0.0775848	0.0523783	0.138548	-0.312568	0.157399
6,7,10	0.0327241	0.0524913	0.533011	-0.202766	0.268214
6,7,11	0.0126577	0.0524568	0.809325	-0.222678	0.247993
6,7,12	-0.00147628	0.0523414	0.977499	-0.236294	0.233341
6,7,13	-0.0370986	0.0524198	0.479122	-0.272268	0.198071
6,7,14	0.0203284	0.0523583	0.697829	-0.214565	0.255222
6,7,15	0.000666691	0.0523727	0.989843	-0.234292	0.235625
6,7,16	0.0202501	0.0524357	0.699358	-0.214991	0.255491
6,8,9	-0.0715491	0.0521787	0.170308	-0.305637	0.162539
6,8,10	0.0131066	0.0523356	0.802253	-0.221685	0.247898
6,8,11	0.163863	0.0522702	0.00171985	-0.0706352	0.398362
6,8,12	-0.0362363	0.0521343	0.487023	-0.270125	0.197652
6,8,13	0.0403418	0.0521784	0.439436	-0.193745	0.274428
6,8,14	-0.0555753	0.0521472	0.286546	-0.289522	0.178371
6,8,15	0.0196189	0.0521457	0.706745	-0.214321	0.253559
6,8,16	0.0106104	0.0522006	0.838931	-0.223576	0.244797
6,9,10	-0.0764589	0.0523033	0.143792	-0.311106	0.158188
6,9,11	0.144152	0.0523344	0.00588098	-0.0906339	0.378938
6,9,12	-0.0593401	0.0521591	0.255261	-0.29334	0.17466
6,9,13	0.0674206	0.052228	0.196747	-0.166888	0.30173
6,9,14	-0.0286639	0.0522114	0.58301	-0.262899	0.205571
6,9,15	0.0529611	0.0522111	0.310413	-0.181272	0.287194
6,9,16	0.00743956	0.0522788	0.886839	-0.227097	0.241976
6,10,11	0.175681	0.0523843	0.0007979	-0.0593289	0.410692
6,10,12	-0.0418428	0.0522927	0.423618	-0.276442	0.192757
6,10,13	0.0135893	0.0523613	0.795228	-0.221318	0.248497
6,10,14	-0.0422751	0.0523169	0.41906	-0.276983	0.192433
6,10,15	-0.0143801	0.0523317	0.78348	-0.249154	0.220394
6,10,16	-0.0687754	0.0523734	0.189129	-0.303737	0.166186
6,11,12	0.096618	0.0522915	0.0646538	-0.137976	0.331212
6,11,13	-0.0315831	0.0524176	0.546825	-0.266743	0.203577
6,11,14	0.0430722	0.0523773	0.410884	-0.191906	0.278051
6,11,15	-0.0277055	0.0523821	0.596869	-0.262706	0.207295
6,11,16	-0.0237647	0.0523753	0.650019	-0.258734	0.211205
6,12,13	0.051157	0.052185	0.326941	-0.182959	0.285273
6,12,14	-0.0782553	0.0521492	0.133464	-0.312211	0.1557
6,12,15	-0.045516	0.0521652	0.38292	-0.279543	0.188511
6,12,16	0.0251295	0.0522231	0.63038	-0.209157	0.259416
6,13,14	-0.0047476	0.0522411	0.927589	-0.239115	0.22962
6,13,15	-0.0444743	0.0522128	0.394334	-0.278715	0.189767
6,13,16	0.0690727	0.052264	0.186303	-0.165398	0.303543
6,14,15	-0.0333408	0.0522049	0.523051	-0.267546	0.200864
6,14,16	-0.0391475	0.0522532	0.453746	-0.273569	0.195274
6,15,16	0.0178031	0.0522549	0.733333	-0.216627	0.252233
7,8,9	-0.180376	0.0523017	0.000563573	-0.415016	0.0542636
7,8,10	0.569727	0.0524359	1.79626e-27	0.334486	0.804969
7,8,11	-0.54745	0.0523541	1.4403e-25	-0.782325	-0.312576
7,8,12	-0.340166	0.0522868	7.79391e-11	-0.574739	-0.105593
7,8,13	0.0444485	0.0523177	0.395557	-0.190263	0.27916
7,8,14	0.00657427	0.0522318	0.899838	-0.227752	0.240901
7,8,15	-0.0436278	0.0522758	0.403964	-0.278151	0.190896
7,8,16	-0.209805	0.0523391	6.11674e-05	-0.444612	0.025003
7,9,10	-0.0237729	0.0524146	0.650151	-0.258919	0.211373
7,9,11	-0.273902	0.0524065	1.73371e-07	-0.509011	-0.0387919
7,9,12	-0.158167	0.0523179	0.0025023	-0.39288	0.076545
7,9,13	0.000216025	0.0523877	0.99671	-0.234809	0.235241
7,9,14	0.00952687	0.0523172	0.855506	-0.225182	0.244236
7,9,15	-0.11769	0.052344	0.0245546	-0.352519	0.117139
7,9,16	0.0210576	0.0524398	0.688011	-0.214201	0.256317
7,10,11	-0.966835	0.0524449	1.13828e-75	-1.20212	-0.731553
7,10,12	-0.0798982	0.0524525	0.127702	-0.315215	0.155418
7,10,13	-0.0833101	0.0524946	0.112513	-0.318815	0.152195
7,10,14	-0.0436654	0.0524056	0.404723	-0.278771	0.19144
7,10,15	0.113213	0.0524598	0.0309256	-0.122136	0.348562
7,10,16	0.129789	0.0525156	0.0134603	-0.105811	0.365388
7,11,12	-0.224364	0.0524052	1.86077e-05	-0.459468	0.0107397
7,11,13	0.0261893	0.0524941	0.617852	-0.209314	0.261692
7,11,14	0.0322056	0.0524142	0.538924	-0.202939	0.26735
7,11,15	-0.00487098	0.0524616	0.926024	-0.240228	0.230486
7,11,16	-0.377917	0.0524581	5.91172e-13	-0.613259	-0.142576
7,12,13	0.0342872	0.0523624	0.512595	-0.200625	0.269199
7,12,14	-0.021773	0.0522798	0.677067	-0.256314	0.212768
7,12,15	-0.203375	0.0523397	0.000102165	-0.438185	0.0314356
7,12,16	-0.0986405	0.0524053	0.0598052	-0.333745	0.136464
7,13,14	0.00328143	0.0523589	0.950028	-0.231615	0.238178
7,13,15	0.111619	0.0523757	0.0330838	-0.123353	0.34659
7,13,16	-0.0426607	0.0524276	0.415816	-0.277865	0.192544
7,14,15	-0.0530042	0.0523049	0.310888	-0.287658	0.18165
7,14,16	-0.129967	0.0523517	0.0130464	-0.364831	0.104897
7,15,16	0.312589	0.0524052	2.46297e-09	0.0774853	0.547694
8,9,10	-0.0586019	0.0522986	0.262494	-0.293227	0.176024
8,9,11	0.0195374	0.0522303	0.708359	-0.214782	0.253857
8,9,12	0.0647902	0.0521313	0.213936	-0.169085	0.298665
8,9,13	0.0274849	0.0521486	0.598161	-0.206468	0.261438
8,9,14	0.00880201	0.0521198	0.865891	-0.225022	0.242626
8,9,15	0.0638531	0.0521459	0.220766	-0.170088	0.297794
8,9,16	0.0370313	0.0522102	0.478159	-0.197198	0.271261
8,10,11	0.122574	0.0523059	0.0191121	-0.112085	0.357232
8,10,12	0.132698	0.0522958	0.011169	-0.101915	0.367311
8,10,13	-0.13174	0.0523157	0.0117991	-0.366443	0.102962
8,10,14	-0.00901008	0.0522505	0.863092	-0.24342	0.2254
8,10,15	0.0706314	0.0522947	0.176816	-0.163977	0.30524
8,10,16	0.174273	0.0523503	0.000872209	-0.0605848	0.409131
8,11,12	-0.126743	0.0522184	0.0152201	-0.361009	0.107523
8,11,13	-0.171762	0.0522704	0.00101671	-0.406262	0.0627372
8,11,14	0.00516063	0.0522267	0.921288	-0.229142	0.239464
8,11,15	0.1754	0.0522559	0.000789693	-0.059034	0.409835
8,11,16	-0.00963242	0.0522619	0.853771	-0.244094	0.224829
8,12,13	0.0147644	0.0521364	0.777034	-0.219133	0.248662
8,12,14	-0.0118736	0.0520782	0.819651	-0.245511	0.221763
8,12,15	-0.0385229	0.0521196	0.459834	-0.272345	0.1953
8,12,16	0.0278931	0.0521773	0.59294	-0.206189	0.261975
8,13,14	-0.0821623	0.0521282	0.114995	-0.316024	0.151699
8,13,15	0.1385	0.0521174	0.00787522	-0.0953126	0.372313
8,13,16	0.0189753	0.0521664	0.71605	-0.215057	0.253008
8,14,15	-0.000472557	0.0520895	0.992762	-0.23416	0.233215
8,14,16	-0.0536729	0.0521351	0.303251	-0.287565	0.180219
8,15,16	0.148028	0.0521657	0.00454617	-0.086001	0.382058
9,10,11	0.351007	0.0522819	1.91464e-11	0.116456	0.585558
9,10,12	-0.126093	0.0522236	0.015761	-0.360382	0.108197
9,10,13	-0.106484	0.0522562	0.0415808	-0.34092	0.127951
9,10,14	-0.067235	0.0522221	0.197932	-0.301518	0.167048
9,10,15	-0.111533	0.0522608	0.0328335	-0.345989	0.122923
9,10,16	0.0166308	0.0523246	0.750609	-0.218112	0.251373
9,11,12	-0.046948	0.0522307	0.368732	-0.281269	0.187373
9,11,13	0.0282014	0.0523283	0.589936	-0.206557	0.26296
9,11,14	0.0199931	0.0522783	0.702139	-0.214542	0.254528
9,11,15	0.0722617	0.0523125	0.167178	-0.162427	0.30695
9,11,16	0.0912213	0.0523205	0.08125	-0.143503	0.325945
9,12,13	0.0717748	0.05215	0.16873	-0.162184	0.305734
9,12,14	0.0319651	0.0521095	0.5396	-0.201812	0.265743
9,12,15	-0.0272599	0.052139	0.601094	-0.26117	0.20665
9,12,16	0.0261942	0.0522134	0.615898	-0.208049	0.260438
9,13,14	0.00965687	0.0521781	0.853171	-0.224428	0.243742
9,13,15	0.10546	0.0521729	0.0432476	-0.128602	0.339522
9,13,16	0.0278995	0.0522327	0.593247	-0.20643	0.262229
9,14,15	0.0580735	0.0521502	0.265463	-0.175886	0.292033
9,14,16	-0.00488139	0.0522026	0.9255	-0.239077	0.229314
9,15,16	0.0817682	0.0522227	0.11741	-0.152517	0.316053
10,11,12	-0.0600633	0.0523059	0.250846	-0.294722	0.174595
10,11,13	-0.0577059	0.0523849	0.270651	-0.292719	0.177307
10,11,14	-0.0414632	0.0523134	0.428019	-0.276155	0.193229
10,11,15	0.116495	0.0523678	0.026115	-0.118441	0.351431
10,11,16	-0.0107045	0.0523582	0.838004	-0.245598	0.224189
10,12,13	-0.0136175	0.0522887	0.794533	-0.248199	0.220964
10,12,14	0.0215548	0.052217	0.67976	-0.212705	0.255814
10,12,15	-0.119971	0.0522743	0.0217347	-0.354488	0.114545
10,12,16	0.0692029	0.0523364	0.186084	-0.165593	0.303998
10,13,14	-0.0164853	0.0522856	0.75254	-0.251053	0.218082
10,13,15	0.0703174	0.0522911	0.178718	-0.164275	0.304909
10,13,16	-0.0826436	0.0523285	0.114268	-0.317404	0.152116
10,14,15	-0.0369008	0.0522506	0.48005	-0.271311	0.19751
10,14,16	-0.0804791	0.0522923	0.123804	-0.315076	0.154118
10,15,16	0.247173	0.0523601	2.35659e-06	0.0122716	0.482075
11,12,13	0.0392455	0.052312	0.453125	-0.19544	0.273931
11,12,14	-0.020571	0.052258	0.693846	-0.255015	0.213873
11,12,15	0.0811607	0.0523044	0.12074	-0.153491	0.315813
11,12,16	-0.0616922	0.0523013	0.238183	-0.29633	0.172946
11,13,14	-0.036973	0.0523662	0.480162	-0.271902	0.197956
11,13,15	0.19561	0.0523754	0.000188071	-0.0393603	0.430581
11,13,16	0.21866	0.0523568	2.96684e-05	-0.0162273	0.453547
11,14,15	0.0014369	0.0523339	0.978096	-0.233347	0.236221
11,14,16	-0.0808434	0.0523197	0.122308	-0.315564	0.153877
11,15,16	0.6	0.0523466	2.20889e-30	0.365159	0.834841
12,13,14	0.00418517	0.0521445	0.93603	-0.229749	0.238119
12,13,15	0.00338755	0.0521525	0.94821	-0.230583	0.237358
12,13,16	0.0540557	0.0522033	0.300447	-0.180143	0.288254
12,14,15	-0.0392338	0.052112	0.451529	-0.273023	0.194555
12,14,16	0.0195726	0.0521659	0.707515	-0.214458	0.253603
12,15,16	-0.057799	0.052206	0.268241	-0.292009	0.176411
13,14,15	-0.0108456	0.0521715	0.835321	-0.244901	0.22321
13,14,16	-0.010798	0.0522104	0.836154	-0.245028	0.223432
13,15,16	0.07671	0.0521945	0.14165	-0.157449	0.310869
14,15,16	0.00844266	0.0521725	0.871446	-0.225617	0.242503
1,2,3,4	0.00415033	0.0394982	0.916315	-0.173049	0.18135
1,2,3,5	-0.234023	0.0393807	2.82197e-09	-0.410696	-0.0573504
1,2,3,6	0.0196539	0.0393254	0.617234	-0.15677	0.196078
1,2,3,7	-0.17623	0.0393631	7.58274e-06	-0.352824	0.000362929
1,2,3,8	-0.0860294	0.0393135	0.0286524	-0.2624	0.0903416
1,2,3,9	-0.0410843	0.0393084	0.295944	-0.217432	0.135264
1,2,3,10	0.0291055	0.0393749	0.459795	-0.147541	0.205752
1,2,3,11	-0.367596	0.0393294	9.36558e-21	-0.544039	-0.191154
1,2,3,12	-0.001098	0.0392923	0.977707	-0.177374	0.175178
1,2,3,13	-0.0120446	0.0393225	0.759376	-0.188456	0.164367
1,2,3,14	-0.0177088	0.0393003	0.652279	-0.194021	0.158603
1,2,3,15	-0.0444977	0.0393042	0.257582	-0.220827	0.131832
1,2,3,16	0.062526	0.0393117	0.111723	-0.113837	0.238889
1,2,4,5	0.0717212	0.0394922	0.0693625	-0.105452	0.248894
1,2,4,6	-0.0220814	0.0394409	0.575576	-0.199024	0.154861
1,2,4,7	-0.171917	0.0394832	1.33801e-05	-0.349049	0.00521556
1,2,4,8	-0.0115825	0.0394332	0.768969	-0.188491	0.165326
1,2,4,9	-0.000971119	0.0394232	0.980348	-0.177835	0.175892
1,2,4,10	-0.120237	0.0394792	0.00232333	-0.297351	0.0568771
1,2,4,11	-0.0658471	0.039441	0.0950225	-0.24279	0.111096
1,2,4,12	-0.0325058	0.0394181	0.409579	-0.209346	0.144335
1,2,4,13	-0.0545618	0.0394396	0.166539	-0.231498	0.122375
1,2,4,14	-0.00125749	0.0394124	0.974547	-0.178072	0.175557
1,2,4,15	-0.00814974	0.0394185	0.836207	-0.184992	0.168692
1,2,4,16	0.0245931	0.039428	0.532797	-0.152292	0.201478
1,2,5,6	-0.0428647	0.0393847	0.276441	-0.219555	0.133826
1,2,5,7	-0.0198464	0.0394419	0.614839	-0.196794	0.157101
1,2,5,8	-0.0192553	0.0393733	0.624812	-0.195895	0.157384
1,2,5,9	-0.00644073	0.0393571	0.870009	-0.183008	0.170126
1,2,5,10	-0.0426177	0.0394003	0.279408	-0.219378	0.134143
1,2,5,11	-0.21305	0.0393798	6.32286e-08	-0.389719	-0.0363818
1,2,5,12	-0.0557399	0.0393606	0.156741	-0.232322	0.120842
1,2,5,13	-0.0361597	0.0393752	0.358445	-0.212807	0.140488
1,2,5,14	0.00968875	0.039349	0.805508	-0.166842	0.186219
1,2,5,15	-0.0424557	0.0393558	0.280696	-0.219017	0.134105
1,2,5,16	0.0293437	0.0393701	0.456076	-0.147281	0.205969
1,2,6,7	-0.00773886	0.0393811	0.84421	-0.184413	0.168935
1,2,6,8	-0.00183956	0.0393162	0.962682	-0.178223	0.174544
1,2,6,9	-0.0291585	0.0393202	0.458354	-0.20556	0.147243
1,2,6,10	0.0477792	0.039359	0.224778	-0.128796	0.224354
1,2,6,11	0.0388419	0.0392997	0.322986	-0.137467	0.215151
1,2,6,12	0.0687656	0.0393064	0.0802141	-0.107574	0.245105
1,2,6,13	-0.0133351	0.039342	0.734646	-0.189834	0.163164
1,2,6,14	0.0083332	0.0393127	0.83213	-0.168034	0.184701
1,2,6,15	0.0413973	0.0393174	0.292391	-0.134991	0.217786
1,2,6,16	0.065138	0.039325	0.0976462	-0.111285	0.241561
1,2,7,8	-0.0396388	0.0393746	0.314078	-0.216284	0.137006
1,2,7,9	0.0867061	0.0393562	0.027591	-0.0898567	0.263269
1,2,7,10	-0.0526564	0.0394051	0.181462	-0.229438	0.124126
1,2,7,11	-0.15785	0.0393751	6.10881e-05	-0.334497	0.0187978
1,2,7,12	0.0570248	0.0393586	0.147385	-0.119549	0.233598
1,2,7,13	0.0572466	0.0393782	0.146017	-0.119415	0.233908
1,2,7,14	0.00430831	0.0393515	0.91282	-0.172233	0.18085
1,2,7,15	-0.0540201	0.0393685	0.170018	-0.230638	0.122598
1,2,7,16	0.0476736	0.0393713	0.225949	-0.128957	0.224304
1,2,8,9	-0.0324737	0.0392994	0.408629	-0.208782	0.143834
1,2,8,10	0.0165278	0.0393611	0.674558	-0.160057	0.193112
1,2,8,11	-0.0722666	0.0392903	0.0658765	-0.248534	0.104
1,2,8,12	0.00273793	0.0392921	0.944447	-0.173537	0.179013
1,2,8,13	-0.0165555	0.0393114	0.673656	-0.192917	0.159806
1,2,8,14	-0.0382377	0.0392846	0.330384	-0.214479	0.138004
1,2,8,15	-0.0102346	0.0392958	0.794517	-0.186526	0.166057
1,2,8,16	0.0305578	0.0392927	0.436751	-0.14572	0.206835
1,2,9,10	-0.00722895	0.0393403	0.854207	-0.18372	0.169262
1,2,9,11	-0.0788678	0.0392754	0.0446402	-0.255068	0.0973322
1,2,9,12	-0.00796217	0.0392862	0.839393	-0.184211	0.168287
1,2,9,13	-0.0306886	0.0393107	0.435	-0.207047	0.14567
1,2,9,14	-0.0168212	0.0392874	0.668538	-0.193075	0.159433
1,2,9,15	-0.000134856	0.0392941	0.997262	-0.176419	0.176149
1,2,9,16	0.0122294	0.0393006	0.755668	-0.164084	0.188543
1,2,10,11	-0.216512	0.0393166	3.66825e-08	-0.392896	-0.0401267
1,2,10,12	0.0365224	0.0393358	0.353165	-0.139949	0.212994
1,2,10,13	0.0298154	0.0393534	0.448675	-0.146735	0.206366
1,2,10,14	-0.0138641	0.0393236	0.724416	-0.190281	0.162552
1,2,10,15	-0.0449986	0.0393357	0.252644	-0.221469	0.131472
1,2,10,16	0.0841382	0.0393446	0.0324811	-0.0923725	0.260649
1,2,11,12	-0.0334887	0.0392754	0.393849	-0.209689	0.142711
1,2,11,13	-0.00907627	0.0392992	0.817352	-0.185383	0.167231
1,2,11,14	0.0190417	0.0392774	0.62782	-0.157167	0.195251
1,2,11,15	0.0313449	0.0392807	0.42489	-0.144879	0.207569
1,2,11,16	-0.100494	0.0392864	0.0105303	-0.276744	0.0757549
1,2,12,13	-0.0206853	0.0393039	0.598688	-0.197013	0.155643
1,2,12,14	0.00513159	0.0392787	0.896056	-0.171083	0.181347
1,2,12,15	0.0142763	0.0392934	0.716363	-0.162004	0.190557
1,2,12,16	0.0398818	0.0392938	0.310127	-0.136401	0.216164
1,2,13,14	0.0342436	0.0393152	0.383757	-0.142135	0.210622
1,2,13,15	-0.0367764	0.0393079	0.349483	-0.213122	0.139569
1,2,13,16	0.0309983	0.0393151	0.430432	-0.14538	0.207376
1,2,14,15	-0.0089677	0.0392871	0.819445	-0.18522	0.167285
1,2,14,16	0.00136435	0.0392879	0.972298	-0.174892	0.177621
1,2,15,16	0.0302261	0.0392991	0.44182	-0.146081	0.206533
1,3,4,5	0.127614	0.039515	0.00124073	-0.049661	0.304889
1,3,4,6	-0.0908589	0.0394846	0.0213883	-0.267998	0.0862797
1,3,4,7	0.00728368	0.0394837	0.853643	-0.169851	0.184418
1,3,4,8	-0.0361821	0.0394738	0.35935	-0.213272	0.140908
1,3,4,9	-0.0397328	0.0394786	0.31421	-0.216845	0.137379
1,3,4,10	0.0332775	0.0395542	0.400175	-0.144174	0.210729
1,3,4,11	-0.172885	0.03952	1.21856e-05	-0.350183	0.0044122
1,3,4,12	-0.0333909	0.0394618	0.397468	-0.210427	0.143646
1,3,4,13	0.0299205	0.0394854	0.448597	-0.147222	0.207063
1,3,4,14	0.0456294	0.0394629	0.24758	-0.131412	0.222671
1,3,4,15	-0.0187887	0.0394671	0.634033	-0.195849	0.158271
1,3,4,16	-0.0187473	0.0394895	0.634972	-0.195908	0.158413
1,3,5,6	-0.0249756	0.039358	0.525709	-0.201546	0.151595
1,3,5,7	-0.125151	0.0393566	0.00147389	-0.301715	0.0514131
1,3,5,8	0.0595236	0.0393444	0.130315	-0.116986	0.236033
1,3,5,9	0.00901988	0.0393416	0.818659	-0.167477	0.185517
1,3,5,10	-0.0651927	0.0393855	0.0978804	-0.241887	0.111502
1,3,5,11	-0.0814564	0.039369	0.0385461	-0.258076	0.0951637
1,3,5,12	-0.0687423	0.0393326	0.0805178	-0.245199	0.107714
1,3,5,13	-0.0439883	0.0393501	0.263627	-0.220524	0.132547
1,3,5,14	-0.00461659	0.0393306	0.90656	-0.181064	0.171831
1,3,5,15	-0.022323	0.0393292	0.570313	-0.198765	0.154119
1,3,5,16	0.053326	0.0393562	0.175436	-0.123237	0.229889
1,3,6,7	0.010804	0.0393108	0.783444	-0.165555	0.187163
1,3,6,8	-0.0349424	0.0392888	0.373806	-0.211203	0.141318
1,3,6,9	-0.00439705	0.0393084	0.910935	-0.180745	0.171951
1,3,6,10	0.0159345	0.0393563	0.685568	-0.160629	0.192498
1,3,6,11	-0.0546696	0.0393124	0.164338	-0.231036	0.121696
1,3,6,12	0.0515724	0.039281	0.189218	-0.124653	0.227798
1,3,6,13	-0.0179686	0.0393209	0.647692	-0.194373	0.158436
1,3,6,14	0.00289032	0.0392956	0.941366	-0.1734	0.179181
1,3,6,15	-0.0481644	0.0392962	0.220326	-0.224458	0.128129
1,3,6,16	0.0191799	0.0393129	0.625638	-0.157188	0.195548
1,3,7,8	-0.0915113	0.039298	0.019881	-0.267813	0.0847901
1,3,7,9	0.0157617	0.039299	0.68837	-0.160544	0.192068
1,3,7,10	0.0777517	0.0393609	0.0482328	-0.0988321	0.254336
1,3,7,11	-0.0240772	0.0393212	0.540328	-0.200483	0.152328
1,3,7,12	0.0209951	0.0392871	0.593066	-0.155257	0.197247
1,3,7,13	-0.0334165	0.0393076	0.395258	-0.209761	0.142928
1,3,7,14	-0.00186035	0.0392848	0.96223	-0.178103	0.174382
1,3,7,15	-0.11078	0.0392964	0.00481749	-0.287075	0.0655138
1,3,7,16	0.096092	0.0393153	0.014523	-0.0802873	0.272471
1,3,8,9	-0.00729207	0.0392831	0.852737	-0.183527	0.168942
1,3,8,10	-0.0629629	0.039354	0.109624	-0.239516	0.11359
1,3,8,11	0.0434932	0.0392902	0.26831	-0.132773	0.21976
1,3,8,12	0.0348598	0.0392642	0.374637	-0.14129	0.21101
1,3,8,13	-0.0141924	0.0392846	0.717898	-0.190434	0.162049
1,3,8,14	0.00359318	0.0392631	0.927083	-0.172552	0.179738
1,3,8,15	-0.0483158	0.0392698	0.218569	-0.224491	0.127859
1,3,8,16	-0.00224946	0.0392796	0.954332	-0.178468	0.17397
1,3,9,10	0.101092	0.0393467	0.0101937	-0.0754275	0.277612
1,3,9,11	-0.0315353	0.0392999	0.422309	-0.207845	0.144775
1,3,9,12	-0.015822	0.0392726	0.68704	-0.19201	0.160366
1,3,9,13	0.00179115	0.0392997	0.963648	-0.174518	0.1781
1,3,9,14	-0.0115629	0.0392802	0.768477	-0.187784	0.164659
1,3,9,15	-0.0153485	0.0392856	0.696028	-0.191594	0.160897
1,3,9,16	0.0189674	0.0392987	0.629348	-0.157337	0.195272
1,3,10,11	-0.0522178	0.0393579	0.184599	-0.228788	0.124352
1,3,10,12	0.136212	0.0393268	0.000533397	-0.0402186	0.312643
1,3,10,13	0.0168277	0.0393521	0.66893	-0.159717	0.193372
1,3,10,14	-0.00617452	0.0393281	0.875245	-0.182611	0.170262
1,3,10,15	-0.0591372	0.0393364	0.132748	-0.235611	0.117336
1,3,10,16	-0.0135717	0.0393518	0.730185	-0.190114	0.162971
1,3,11,12	-0.0753904	0.0392838	0.0549741	-0.251628	0.100848
1,3,11,13	0.00335186	0.039313	0.932054	-0.173017	0.179721
1,3,11,14	-0.00391311	0.0392954	0.920677	-0.180203	0.172377
1,3,11,15	0.0470377	0.0392973	0.231324	-0.129261	0.223336
1,3,11,16	-0.0485124	0.0393104	0.217175	-0.224869	0.127845
1,3,12,13	-0.00800515	0.0392802	0.838514	-0.184227	0.168217
1,3,12,14	0.0348298	0.0392599	0.374997	-0.141301	0.21096
1,3,12,15	-0.0108921	0.0392705	0.781504	-0.18707	0.165286
1,3,12,16	0.00360892	0.0392772	0.926791	-0.172599	0.179817
1,3,13,14	-0.0122863	0.0393011	0.754571	-0.188602	0.164029
1,3,13,15	-0.00563927	0.0392899	0.885872	-0.181905	0.170626
1,3,13,16	0.0160155	0.0393031	0.683652	-0.160309	0.19234
1,3,14,15	-0.0515266	0.039273	0.189522	-0.227716	0.124663
1,3,14,16	0.0155213	0.0392811	0.692745	-0.160704	0.191747
1,3,15,16	-0.0634458	0.03929	0.106358	-0.239711	0.11282
1,4,5,6	0.0784037	0.0394716	0.0470012	-0.0986765	0.255484
1,4,5,7	0.0265237	0.0394785	0.501681	-0.150588	0.203635
1,4,5,8	0.105128	0.0394568	0.00771518	-0.071886	0.282142
1,4,5,9	0.00415311	0.0394499	0.916157	-0.17283	0.181136
1,4,5,10	0.0289531	0.0394844	0.463391	-0.148185	0.206091
1,4,5,11	0.0582033	0.0394773	0.140393	-0.118902	0.235309
1,4,5,12	-0.0035059	0.0394532	0.929192	-0.180504	0.173492
1,4,5,13	-0.0359421	0.0394648	0.362438	-0.212992	0.141108
1,4,5,14	-0.0146062	0.0394393	0.711125	-0.191542	0.162329
1,4,5,15	0.063097	0.0394418	0.10966	-0.11385	0.240044
1,4,5,16	-0.0705184	0.0394687	0.0739928	-0.247586	0.106549
1,4,6,7	0.017995	0.039432	0.648136	-0.158908	0.194898
1,4,6,8	0.0467866	0.0394153	0.235226	-0.130041	0.223615
1,4,6,9	-0.0492284	0.0394276	0.211825	-0.226111	0.127655
1,4,6,10	0.0258048	0.0394596	0.513143	-0.151222	0.202831
1,4,6,11	-0.0430996	0.0394324	0.274399	-0.220004	0.133805
1,4,6,12	-0.0501121	0.039411	0.203546	-0.226921	0.126696
1,4,6,13	0.00162698	0.0394424	0.967097	-0.175322	0.178576
1,4,6,14	0.0132435	0.0394153	0.736872	-0.163584	0.190071
1,4,6,15	0.022802	0.0394132	0.562903	-0.154016	0.19962
1,4,6,16	0.0224174	0.0394406	0.569776	-0.154524	0.199359
1,4,7,8	0.0602512	0.0394288	0.126493	-0.116637	0.237139
1,4,7,9	0.0269954	0.0394179	0.49344	-0.149844	0.203835
1,4,7,10	0.0473969	0.0394623	0.229731	-0.129642	0.224436
1,4,7,11	-0.156459	0.0394386	7.28243e-05	-0.333391	0.0204732
1,4,7,12	0.0472372	0.0394172	0.230771	-0.129599	0.224074
1,4,7,13	-0.000553003	0.0394281	0.98881	-0.177438	0.176332
1,4,7,14	0.00174903	0.0394035	0.964596	-0.175026	0.178524
1,4,7,15	-0.0307591	0.0394174	0.435193	-0.207596	0.146078
1,4,7,16	0.191313	0.039441	1.23402e-06	0.0143701	0.368256
1,4,8,9	0.0230171	0.0394105	0.559199	-0.153789	0.199823
1,4,8,10	0.00394579	0.0394686	0.920366	-0.173121	0.181013
1,4,8,11	-0.0869804	0.0394207	0.0273553	-0.263832	0.0898715
1,4,8,12	0.0787095	0.0394021	0.0457652	-0.0980592	0.255478
1,4,8,13	-0.0233769	0.0394149	0.553117	-0.200203	0.153449
1,4,8,14	0.00220791	0.039389	0.955299	-0.174502	0.178918
1,4,8,15	-0.00789734	0.0393973	0.841126	-0.184644	0.16885
1,4,8,16	0.130508	0.0394125	0.000929122	-0.0463076	0.307323
1,4,9,10	0.0520992	0.0394498	0.186625	-0.124883	0.229082
1,4,9,11	0.013247	0.0394197	0.736834	-0.163601	0.190095
1,4,9,12	0.0468489	0.0394016	0.234441	-0.129917	0.223615
1,4,9,13	0.0289733	0.0394216	0.462366	-0.147883	0.205829
1,4,9,14	0.0133047	0.0393974	0.735586	-0.163443	0.190052
1,4,9,15	0.0421398	0.039403	0.284869	-0.134633	0.218912
1,4,9,16	0.00608741	0.0394251	0.877291	-0.170784	0.182959
1,4,10,11	-0.222151	0.0394529	1.80234e-08	-0.399147	-0.0451543
1,4,10,12	0.0148542	0.0394447	0.706485	-0.162106	0.191814
1,4,10,13	0.043412	0.0394579	0.271245	-0.133607	0.220431
1,4,10,14	0.0411639	0.0394304	0.296507	-0.135732	0.218059
1,4,10,15	-0.096849	0.0394376	0.014062	-0.273777	0.0800789
1,4,10,16	0.0378731	0.0394641	0.337217	-0.139174	0.21492
1,4,11,12	-0.0632091	0.0394171	0.108809	-0.240045	0.113627
1,4,11,13	-0.0124116	0.0394322	0.752946	-0.189315	0.164492
1,4,11,14	0.00553631	0.0394109	0.888284	-0.171272	0.182345
1,4,11,15	0.00275366	0.0394148	0.944302	-0.174072	0.179579
1,4,11,16	-0.0369667	0.0394353	0.348556	-0.213884	0.139951
1,4,12,13	-0.00404236	0.0394133	0.91831	-0.180861	0.172776
1,4,12,14	0.00860658	0.0393907	0.827046	-0.168111	0.185324
1,4,12,15	-0.00464274	0.0393999	0.906198	-0.181401	0.172116
1,4,12,16	0.0505725	0.0394169	0.199491	-0.126262	0.227407
1,4,13,14	-0.00989543	0.0394201	0.801796	-0.186745	0.166954
1,4,13,15	-0.0393437	0.039408	0.318106	-0.216139	0.137451
1,4,13,16	-0.0349079	0.0394334	0.376033	-0.211817	0.142001
1,4,14,15	0.0213752	0.0393897	0.587365	-0.155338	0.198088
1,4,14,16	0.0248325	0.0394078	0.528604	-0.151961	0.201626
1,4,15,16	-0.0260719	0.039417	0.508334	-0.202907	0.150764
1,5,6,7	-0.00725425	0.0393755	0.853832	-0.183904	0.169395
1,5,6,8	-0.000969214	0.0393397	0.980345	-0.177458	0.175519
1,5,6,9	-0.0502678	0.0393472	0.201415	-0.22679	0.126254
1,5,6,10	-0.0404817	0.0393634	0.303761	-0.217077	0.136113
1,5,6,11	-0.00300133	0.0393438	0.939193	-0.179508	0.173505
1,5,6,12	-0.0603487	0.0393357	0.124987	-0.236819	0.116122
1,5,6,13	-0.000265961	0.0393673	0.99461	-0.176878	0.176347
1,5,6,14	0.00921539	0.0393392	0.814788	-0.167271	0.185702
1,5,6,15	-0.0163967	0.0393403	0.676833	-0.192888	0.160095
1,5,6,16	-0.000232694	0.039357	0.995283	-0.176799	0.176333
1,5,7,8	-0.0556654	0.0393677	0.157371	-0.232279	0.120949
1,5,7,9	0.0565634	0.0393509	0.150606	-0.119975	0.233102
1,5,7,10	-0.0446645	0.0393769	0.256681	-0.22132	0.131991
1,5,7,11	-0.0720227	0.0393816	0.0674285	-0.248699	0.104654
1,5,7,12	0.0305262	0.0393578	0.437984	-0.146044	0.207096
1,5,7,13	-0.00909263	0.0393645	0.817327	-0.185693	0.167507
1,5,7,14	0.0455147	0.0393381	0.247272	-0.130967	0.221996
1,5,7,15	-0.0552305	0.0393542	0.160497	-0.231784	0.121323
1,5,7,16	0.0258036	0.0393742	0.512249	-0.15084	0.202447
1,5,8,9	-0.0169045	0.039323	0.667278	-0.193318	0.159509
1,5,8,10	-0.0376888	0.0393638	0.338346	-0.214286	0.138908
1,5,8,11	0.0759412	0.0393305	0.0535067	-0.100506	0.252389
1,5,8,12	-0.107337	0.03932	0.00633858	-0.283737	0.0690632
1,5,8,13	-0.00462719	0.0393311	0.906348	-0.181077	0.171823
1,5,8,14	0.0772605	0.0393055	0.0493449	-0.0990746	0.253596
1,5,8,15	0.00302577	0.0393104	0.938647	-0.173331	0.179383
1,5,8,16	-0.0151344	0.0393279	0.700368	-0.19157	0.161301
1,5,9,10	5.87144e-05	0.0393393	0.998809	-0.176428	0.176545
1,5,9,11	-0.0724281	0.0393175	0.065461	-0.248817	0.103961
1,5,9,12	0.0030622	0.0393151	0.937917	-0.173316	0.179441
1,5,9,13	-0.00237943	0.0393324	0.951761	-0.178835	0.174076
1,5,9,14	-0.028001	0.0393102	0.476277	-0.204357	0.148355
1,5,9,15	-0.0062562	0.0393152	0.873568	-0.182635	0.170123
1,5,9,16	0.0299315	0.039329	0.446628	-0.146509	0.206372
1,5,10,11	-0.0338325	0.0393381	0.389768	-0.210314	0.142649
1,5,10,12	-0.034158	0.0393419	0.385269	-0.210656	0.14234
1,5,10,13	-0.00326344	0.0393545	0.933912	-0.179818	0.173291
1,5,10,14	0.0540217	0.0393265	0.16955	-0.122408	0.230451
1,5,10,15	0.0403475	0.0393348	0.305016	-0.136119	0.216814
1,5,10,16	0.0833216	0.0393559	0.034253	-0.0932396	0.259883
1,5,11,12	-0.0220547	0.039323	0.574896	-0.198469	0.154359
1,5,11,13	0.0164335	0.0393372	0.676124	-0.160044	0.192911
1,5,11,14	0.000410268	0.0393167	0.991674	-0.175975	0.176796
1,5,11,15	0.0515581	0.039321	0.189792	-0.124847	0.227963
1,5,11,16	0.0264409	0.0393349	0.50146	-0.150026	0.202908
1,5,12,13	-0.0487293	0.0393298	0.215354	-0.225174	0.127715
1,5,12,14	-0.00734123	0.0393066	0.851843	-0.183681	0.168999
1,5,12,15	-0.0817232	0.0393194	0.0376727	-0.25812	0.0946742
1,5,12,16	0.0217458	0.0393311	0.580341	-0.154704	0.198196
1,5,13,14	-0.0151327	0.0393358	0.700457	-0.191604	0.161338
1,5,13,15	0.000835065	0.039325	0.983058	-0.175588	0.177258
1,5,13,16	-0.0115482	0.0393414	0.769112	-0.188044	0.164948
1,5,14,15	-0.00744767	0.0393067	0.849721	-0.183788	0.168893
1,5,14,16	0.0611893	0.0393182	0.119652	-0.115203	0.237581
1,5,15,16	-0.00903253	0.0393237	0.818328	-0.18545	0.167384
1,6,7,8	-0.0399923	0.0393137	0.309033	-0.216364	0.13638
1,6,7,9	-0.0122647	0.0393189	0.755095	-0.18866	0.16413
1,6,7,10	0.0274654	0.0393467	0.485157	-0.149054	0.203985
1,6,7,11	0.0623643	0.0393053	0.112594	-0.11397	0.238698
1,6,7,12	0.022391	0.0393068	0.56892	-0.15395	0.198732
1,6,7,13	-0.0203352	0.0393363	0.605188	-0.196808	0.156138
1,6,7,14	0.000506782	0.0393064	0.989713	-0.175832	0.176846
1,6,7,15	-0.0105746	0.039319	0.787974	-0.186971	0.165821
1,6,7,16	0.0193211	0.0393368	0.623307	-0.157155	0.195797
1,6,8,9	-0.0466439	0.0392925	0.235196	-0.222921	0.129633
1,6,8,10	-0.0490434	0.0393339	0.212458	-0.225506	0.127419
1,6,8,11	0.035366	0.03926	0.36769	-0.140765	0.211497
1,6,8,12	-0.00138369	0.0392726	0.971894	-0.177571	0.174804
1,6,8,13	-0.019885	0.0393025	0.612895	-0.196207	0.156437
1,6,8,14	0.0191103	0.0392759	0.626568	-0.157092	0.195313
1,6,8,15	-0.00443342	0.0392792	0.910135	-0.180651	0.171784
1,6,8,16	0.00149591	0.0392905	0.969629	-0.174772	0.177764
1,6,9,10	0.0631531	0.0393298	0.108338	-0.113291	0.239597
1,6,9,11	0.0176835	0.0392744	0.652528	-0.158512	0.193879
1,6,9,12	0.00842862	0.039289	0.830136	-0.167833	0.18469
1,6,9,13	-0.0335296	0.0393221	0.393835	-0.209939	0.14288
1,6,9,14	-0.015745	0.0392966	0.688664	-0.19204	0.16055
1,6,9,15	-0.00691625	0.0393012	0.86031	-0.183232	0.1694
1,6,9,16	-0.0749718	0.0393156	0.0565356	-0.251352	0.101409
1,6,10,11	-0.00040714	0.0392966	0.991734	-0.176703	0.175888
1,6,10,12	0.0301928	0.0393136	0.44249	-0.146179	0.206564
1,6,10,13	-0.00740966	0.0393453	0.850623	-0.183923	0.169104
1,6,10,14	0.0372731	0.0393148	0.3431	-0.139104	0.21365
1,6,10,15	-0.00906256	0.0393231	0.817732	-0.185477	0.167351
1,6,10,16	0.0289821	0.0393402	0.461306	-0.147509	0.205473
1,6,11,12	-0.0602701	0.0392591	0.124743	-0.236397	0.115857
1,6,11,13	-0.0168592	0.0392942	0.667888	-0.193143	0.159425
1,6,11,14	-0.035796	0.0392698	0.362015	-0.211971	0.140379
1,6,11,15	0.051243	0.0392744	0.191985	-0.124953	0.227439
1,6,11,16	-0.00171803	0.0392814	0.965115	-0.177945	0.174509
1,6,12,13	-0.0238479	0.0393036	0.544012	-0.200175	0.152479
1,6,12,14	0.0288733	0.0392782	0.462284	-0.14734	0.205086
1,6,12,15	0.0149026	0.039287	0.704446	-0.16135	0.191155
1,6,12,16	0.00592039	0.039298	0.880249	-0.170381	0.182222
1,6,13,14	-0.0368817	0.0393221	0.34828	-0.213291	0.139528
1,6,13,15	0.0673192	0.0393137	0.0868359	-0.109053	0.243691
1,6,13,16	-0.0360362	0.0393265	0.359495	-0.212466	0.140393
1,6,14,15	0.0264668	0.0392912	0.500565	-0.149804	0.202738
1,6,14,16	0.0507652	0.0393026	0.196484	-0.125557	0.227087
1,6,15,16	-0.0375507	0.0393036	0.339378	-0.213877	0.138776
1,7,8,9	0.0575138	0.0393015	0.143363	-0.118803	0.233831
1,7,8,10	0.0143025	0.0393617	0.716337	-0.162285	0.19089
1,7,8,11	0.0153326	0.0392989	0.696425	-0.160973	0.191638
1,7,8,12	0.0747223	0.0392968	0.0572433	-0.101574	0.251018
1,7,8,13	-0.0262508	0.039312	0.504292	-0.202615	0.150113
1,7,8,14	-0.00243747	0.0392851	0.950527	-0.178681	0.173806
1,7,8,15	-0.052215	0.0393009	0.183987	-0.228529	0.1241
1,7,8,16	0.0113432	0.039313	0.772937	-0.165026	0.187712
1,7,9,10	-0.0716283	0.0393292	0.0685739	-0.24807	0.104813
1,7,9,11	-0.0244383	0.039286	0.533905	-0.200686	0.151809
1,7,9,12	0.014688	0.0392914	0.708538	-0.161584	0.19096
1,7,9,13	-0.0527848	0.0393101	0.179348	-0.22914	0.123571
1,7,9,14	-0.00355031	0.0392849	0.927991	-0.179793	0.172693
1,7,9,15	-0.0377846	0.0393012	0.336349	-0.2141	0.138531
1,7,9,16	-0.0168937	0.0393154	0.667418	-0.193273	0.159486
1,7,10,11	0.0971768	0.0393126	0.0134425	-0.07919	0.273544
1,7,10,12	-0.0557287	0.0393275	0.156476	-0.232163	0.120705
1,7,10,13	-0.0382231	0.0393393	0.331241	-0.21471	0.138264
1,7,10,14	-0.0327923	0.0393108	0.404183	-0.209151	0.143567
1,7,10,15	-0.0175819	0.0393291	0.654845	-0.194023	0.158859
1,7,10,16	0.00619119	0.0393507	0.874983	-0.170347	0.182729
1,7,11,12	0.0298336	0.0392893	0.447658	-0.146429	0.206096
1,7,11,13	-0.00989421	0.0393029	0.801241	-0.186218	0.166429
1,7,11,14	-0.0254611	0.0392805	0.516867	-0.201684	0.150762
1,7,11,15	0.104532	0.0392967	0.00781473	-0.0717639	0.280828
1,7,11,16	-0.0232022	0.0393087	0.555021	-0.199552	0.153147
1,7,12,13	-0.0164596	0.0393062	0.675399	-0.192798	0.159879
1,7,12,14	0.00759266	0.039281	0.846732	-0.168633	0.183818
1,7,12,15	-0.00284336	0.0393052	0.942331	-0.179177	0.17349
1,7,12,16	0.0401452	0.0393113	0.307159	-0.136216	0.216507
1,7,13,14	-0.0210091	0.0393086	0.593021	-0.197358	0.15534
1,7,13,15	-0.0296337	0.0393098	0.450942	-0.205988	0.146721
1,7,13,16	0.00582646	0.0393266	0.88222	-0.170603	0.182256
1,7,14,15	0.000787651	0.0392879	0.984005	-0.175468	0.177044
1,7,14,16	0.00511387	0.0393	0.896469	-0.171196	0.181424
1,7,15,16	-0.030992	0.0393177	0.430557	-0.207382	0.145398
1,8,9,10	-0.0499932	0.0393223	0.203602	-0.226404	0.126417
1,8,9,11	0.0270122	0.0392479	0.491301	-0.149065	0.203089
1,8,9,12	0.0180803	0.0392655	0.645187	-0.158076	0.194236
1,8,9,13	0.0377367	0.0392834	0.336744	-0.1385	0.213973
1,8,9,14	-0.00942322	0.039261	0.81032	-0.185559	0.166712
1,8,9,15	0.0135377	0.039271	0.730301	-0.162643	0.189718
1,8,9,16	-0.000737623	0.0392792	0.985018	-0.176955	0.17548
1,8,10,11	-0.0750335	0.0392963	0.0562119	-0.251328	0.101261
1,8,10,12	-0.00854523	0.0393151	0.827934	-0.184923	0.167833
1,8,10,13	0.0485721	0.0393303	0.216844	-0.127875	0.225019
1,8,10,14	0.00507781	0.0393001	0.897195	-0.171233	0.181389
1,8,10,15	-0.0518376	0.0393133	0.187317	-0.228208	0.124533
1,8,10,16	-0.0328837	0.0393277	0.403076	-0.209318	0.143551
1,8,11,12	-0.0605936	0.0392416	0.122565	-0.236642	0.115455
1,8,11,13	-0.0177256	0.0392599	0.651636	-0.193856	0.158405
1,8,11,14	-0.0155464	0.0392373	0.691948	-0.191576	0.160483
1,8,11,15	0.0115939	0.0392467	0.767681	-0.164477	0.187665
1,8,11,16	-0.0124812	0.0392496	0.750489	-0.188565	0.163603
1,8,12,13	-0.0197018	0.0392735	0.615911	-0.195893	0.15649
1,8,12,14	-0.0116775	0.0392482	0.766064	-0.187756	0.164401
1,8,12,15	-0.0117558	0.039264	0.764633	-0.187905	0.164393
1,8,12,16	0.0207478	0.0392685	0.597254	-0.155421	0.196917
1,8,13,14	0.00322843	0.03928	0.934496	-0.172993	0.179449
1,8,13,15	-0.0141832	0.0392723	0.717987	-0.190369	0.162003
1,8,13,16	-0.0227837	0.0392837	0.561932	-0.199021	0.153454
1,8,14,15	0.0271575	0.0392525	0.489023	-0.14894	0.203255
1,8,14,16	0.0166875	0.0392576	0.670782	-0.159433	0.192808
1,8,15,16	-0.0428635	0.0392689	0.275041	-0.219034	0.133307
1,9,10,11	-0.0688782	0.0392797	0.0795161	-0.245098	0.107341
1,9,10,12	0.0273637	0.0392998	0.486256	-0.148946	0.203673
1,9,10,13	0.0775351	0.0393197	0.048624	-0.0988637	0.253934
1,9,10,14	0.0109163	0.0392947	0.781163	-0.16537	0.187203
1,9,10,15	-0.0183896	0.0393072	0.639898	-0.194732	0.157953
1,9,10,16	-0.00944251	0.0393205	0.810221	-0.185845	0.16696
1,9,11,12	-0.0109864	0.0392442	0.779517	-0.187047	0.165074
1,9,11,13	-0.0425217	0.0392668	0.278861	-0.218683	0.13364
1,9,11,14	-0.0496948	0.0392482	0.205458	-0.225773	0.126383
1,9,11,15	-0.00375398	0.0392565	0.923817	-0.179869	0.172361
1,9,11,16	-0.00516822	0.0392602	0.895269	-0.1813	0.170964
1,9,12,13	-0.02883	0.0392831	0.46301	-0.205064	0.147404
1,9,12,14	-0.0163889	0.0392594	0.67635	-0.192517	0.159739
1,9,12,15	0.0324931	0.039276	0.40807	-0.14371	0.208696
1,9,12,16	0.00829722	0.0392802	0.832707	-0.167924	0.184519
1,9,13,14	0.0259835	0.0392947	0.508456	-0.150303	0.20227
1,9,13,15	-0.00607231	0.0392877	0.877169	-0.182328	0.170183
1,9,13,16	-0.00950758	0.0392977	0.80883	-0.185808	0.166792
1,9,14,15	0.0141502	0.0392694	0.718596	-0.162023	0.190323
1,9,14,16	-0.0155415	0.0392758	0.692327	-0.191743	0.16066
1,9,15,16	-0.0625033	0.0392856	0.111615	-0.238749	0.113742
1,10,11,12	-0.0623953	0.0392722	0.112114	-0.238581	0.113791
1,10,11,13	0.0766943	0.0392956	0.0509754	-0.0995965	0.252985
1,10,11,14	-0.00427061	0.0392695	0.9134	-0.180444	0.171903
1,10,11,15	0.0139274	0.0392811	0.722923	-0.162298	0.190153
1,10,11,16	-0.0524896	0.03929	0.18157	-0.228755	0.123776
1,10,12,13	-0.0564291	0.039314	0.151195	-0.232803	0.119944
1,10,12,14	0.00236775	0.0392847	0.95194	-0.173874	0.17861
1,10,12,15	-0.00180689	0.039304	0.963333	-0.178135	0.174521
1,10,12,16	-0.0166354	0.0393131	0.672186	-0.193005	0.159734
1,10,13,14	0.0693874	0.0393178	0.0776053	-0.107003	0.245778
1,10,13,15	0.0528413	0.0393141	0.178928	-0.123532	0.229215
1,10,13,16	0.0105672	0.0393295	0.788174	-0.165876	0.18701
1,10,14,15	-0.0292521	0.0392913	0.45658	-0.205524	0.147019
1,10,14,16	0.0391992	0.039301	0.31857	-0.137116	0.215514
1,10,15,16	-0.0327835	0.0393184	0.404399	-0.209177	0.14361
1,11,12,13	0.00373391	0.0392593	0.924229	-0.172394	0.179862
1,11,12,14	-0.0217887	0.0392397	0.57871	-0.197829	0.154251
1,11,12,15	-0.0014155	0.0392555	0.971236	-0.177526	0.174695
1,11,12,16	-0.0277743	0.0392528	0.479212	-0.203873	0.148324
1,11,13,14	-0.0409862	0.0392757	0.296698	-0.217188	0.135215
1,11,13,15	0.0137468	0.0392682	0.726285	-0.162421	0.189915
1,11,13,16	-0.0197693	0.039273	0.614698	-0.195959	0.15642
1,11,14,15	0.0613513	0.0392514	0.11805	-0.114741	0.237444
1,11,14,16	-0.0501257	0.0392539	0.201621	-0.22623	0.125978
1,11,15,16	0.0831149	0.0392633	0.0342759	-0.0930308	0.259261
1,12,13,14	-0.0882376	0.0392826	0.0246931	-0.26447	0.0879946
1,12,13,15	0.00672316	0.0392811	0.864103	-0.169503	0.182949
1,12,13,16	-0.042832	0.0392906	0.275659	-0.2191	0.133436
1,12,14,15	-0.0182421	0.0392631	0.642211	-0.194387	0.157903
1,12,14,16	-0.0241273	0.0392668	0.538923	-0.200289	0.152034
1,12,15,16	0.0219317	0.0392822	0.576634	-0.154299	0.198162
1,13,14,15	0.032347	0.0392888	0.410333	-0.143913	0.208607
1,13,14,16	-0.0172891	0.0392961	0.65996	-0.193582	0.159004
1,13,15,16	-0.0139456	0.0392906	0.722639	-0.190214	0.162323
1,14,15,16	-0.0277726	0.0392703	0.479435	-0.20395	0.148405
2,3,4,5	-0.962954	0.0395551	3.07271e-130	-1.14041	-0.785499
2,3,4,6	0.0258922	0.0395016	0.512166	-0.151323	0.203107
2,3,4,7	1.09583	0.0395357	5.6584e-168	0.918458	1.27319
2,3,4,8	0.0924021	0.0395066	0.019344	-0.0848355	0.26964
2,3,4,9	0.123693	0.0395012	0.0017408	-0.0535202	0.300906
2,3,4,10	0.211745	0.039577	8.81906e-08	0.034192	0.389298
2,3,4,11	-0.024716	0.0395406	0.531922	-0.202106	0.152674
2,3,4,12	0.0986154	0.0394843	0.0125071	-0.078522	0.275753
2,3,4,13	-0.0828481	0.0395064	0.0359908	-0.260085	0.0943883
2,3,4,14	0.06284	0.0394823	0.11148	-0.114288	0.239968
2,3,4,15	0.0256053	0.0394817	0.51664	-0.15152	0.202731
2,3,4,16	0.177619	0.039499	6.912e-06	0.000415806	0.354822
2,3,5,6	0.0518506	0.0393994	0.18817	-0.124906	0.228607
2,3,5,7	0.454496	0.0394535	1.13408e-30	0.277497	0.631495
2,3,5,8	-0.170677	0.0394043	1.484e-05	-0.347455	0.00610165
2,3,5,9	0.0303556	0.039381	0.440818	-0.146318	0.20703
2,3,5,10	0.208217	0.0394495	1.31036e-07	0.0312356	0.385198
2,3,5,11	0.639867	0.0394288	4.31081e-59	0.462979	0.816756
2,3,5,12	0.147147	0.0393793	0.000186654	-0.0295187	0.323813
2,3,5,13	0.0340623	0.0393887	0.387168	-0.142646	0.210771
2,3,5,14	5.49062e-05	0.0393731	0.998887	-0.176583	0.176693
2,3,5,15	-0.00250018	0.0393678	0.949362	-0.179115	0.174115
2,3,5,16	0.0344948	0.0393882	0.381162	-0.142212	0.211201
2,3,6,7	0.0173802	0.0393747	0.658921	-0.159265	0.194026
2,3,6,8	-0.0317928	0.0393204	0.418772	-0.208195	0.144609
2,3,6,9	-0.0172338	0.0393254	0.661216	-0.193658	0.159191
2,3,6,10	0.0105124	0.0393883	0.789553	-0.166194	0.187219
2,3,6,11	-0.0740626	0.0393341	0.0597173	-0.250526	0.102401
2,3,6,12	-0.0178998	0.0393013	0.648786	-0.194216	0.158416
2,3,6,13	0.00671691	0.0393388	0.864425	-0.169768	0.183201
2,3,6,14	0.00729499	0.0393154	0.852798	-0.169085	0.183675
2,3,6,15	-0.0437888	0.0393117	0.265332	-0.220152	0.132574
2,3,6,16	0.0492735	0.0393225	0.210189	-0.127138	0.225685
2,3,7,8	0.328356	0.0393782	7.68796e-17	0.151695	0.505017
2,3,7,9	-0.0934923	0.0393624	0.0175442	-0.270083	0.0830981
2,3,7,10	0.403685	0.0394394	1.44296e-24	0.226749	0.58062
2,3,7,11	1.16171	0.0393952	1.08054e-189	0.984977	1.33845
2,3,7,12	0.0761069	0.0393575	0.0531506	-0.100461	0.252675
2,3,7,13	0.0841333	0.0393743	0.032622	-0.0925106	0.260777
2,3,7,14	-0.132718	0.0393539	0.00074561	-0.30927	0.0438346
2,3,7,15	0.232088	0.0393633	3.74387e-09	0.0554937	0.408683
2,3,7,16	-0.247894	0.0393684	3.06112e-10	-0.424511	-0.0712766
2,3,8,9	0.0286159	0.0393158	0.46671	-0.147766	0.204997
2,3,8,10	0.110704	0.0394126	0.00497366	-0.0661119	0.28752
2,3,8,11	0.210592	0.039336	8.65174e-08	0.0341202	0.387064
2,3,8,12	-0.09185	0.0392986	0.0194304	-0.268154	0.0844542
2,3,8,13	0.0420106	0.0393201	0.285333	-0.13439	0.218411
2,3,8,14	0.0570815	0.0392986	0.146366	-0.119223	0.233386
2,3,8,15	-0.00274897	0.0393002	0.944235	-0.17906	0.173562
2,3,8,16	0.0182495	0.0393028	0.642412	-0.158073	0.194572
2,3,9,10	0.0672243	0.0393831	0.0878405	-0.109459	0.243908
2,3,9,11	0.0901946	0.0393232	0.0218127	-0.0862198	0.266609
2,3,9,12	0.0878093	0.039291	0.0254312	-0.0884607	0.264079
2,3,9,13	0.00168016	0.0393178	0.965915	-0.17471	0.178071
2,3,9,14	0.0363829	0.0393013	0.354584	-0.139933	0.212699
2,3,9,15	-0.0321775	0.0393009	0.412934	-0.208492	0.144137
2,3,9,16	0.0643391	0.0393087	0.101686	-0.112011	0.240689
2,3,10,11	0.237327	0.0393997	1.71659e-09	0.0605689	0.414085
2,3,10,12	0.0755794	0.0393746	0.0549269	-0.101066	0.252225
2,3,10,13	0.00874561	0.039389	0.82429	-0.167964	0.185455
2,3,10,14	0.0836377	0.0393638	0.0336129	-0.0929591	0.260235
2,3,10,15	-0.101232	0.0393702	0.0101349	-0.277857	0.0753937
2,3,10,16	0.294607	0.0393846	7.52323e-14	0.117917	0.471297
2,3,11,12	0.178779	0.0393132	5.43849e-06	0.00240913	0.355149
2,3,11,13	0.0265335	0.0393405	0.500022	-0.149959	0.203026
2,3,11,14	0.0622599	0.0393206	0.113338	-0.114143	0.238663
2,3,11,15	-0.0882112	0.0393188	0.0248691	-0.264606	0.0881834
2,3,11,16	0.0748369	0.0393254	0.0570433	-0.101587	0.251261
2,3,12,13	0.0415138	0.0393022	0.290848	-0.134807	0.217834
2,3,12,14	-0.00131834	0.0392828	0.973228	-0.177552	0.174915
2,3,12,15	0.187287	0.0392918	1.87842e-06	0.0110138	0.363561
2,3,12,16	0.0911003	0.0392931	0.0204269	-0.0851794	0.26738
2,3,13,14	0.0514835	0.0393191	0.190412	-0.124913	0.22788
2,3,13,15	-0.0429006	0.0393072	0.275092	-0.219243	0.133442
2,3,13,16	0.0441082	0.0393176	0.261933	-0.132281	0.220498
2,3,14,15	0.0354828	0.0392937	0.366522	-0.1408	0.211765
2,3,14,16	0.0224204	0.0392949	0.568294	-0.153867	0.198708
2,3,15,16	-0.13026	0.0393032	0.000919481	-0.306585	0.0460644
2,4,5,6	-0.0332262	0.0395092	0.400366	-0.210475	0.144023
2,4,5,7	0.197505	0.0395682	6.00862e-07	0.0199913	0.375019
2,4,5,8	-0.103614	0.0395068	0.00872628	-0.280852	0.0736242
2,4,5,9	-0.0475488	0.0394921	0.228592	-0.224721	0.129624
2,4,5,10	-0.362448	0.0395417	5.05745e-20	-0.539842	-0.185053
2,4,5,11	-1.41156	0.0395288	3.212e-276	-1.5889	-1.23422
2,4,5,12	-0.00950569	0.0394977	0.809816	-0.186703	0.167692
2,4,5,13	0.118371	0.0395	0.00272997	-0.0588364	0.295579
2,4,5,14	-0.0171692	0.0394785	0.663637	-0.194281	0.159942
2,4,5,15	-0.129445	0.0394781	0.00104276	-0.306554	0.0476649
2,4,5,16	-0.194619	0.0394983	8.36176e-07	-0.371819	-0.0174189
2,4,6,7	0.0344147	0.0394939	0.383543	-0.142766	0.211595
2,4,6,8	0.0444441	0.0394367	0.259758	-0.13248	0.221368
2,4,6,9	0.0730226	0.0394385	0.0640948	-0.103909	0.249955
2,4,6,10	0.0130169	0.0394891	0.741679	-0.164142	0.190176
2,4,6,11	-0.0906196	0.0394421	0.021592	-0.267568	0.0863286
2,4,6,12	0.053098	0.0394224	0.178018	-0.123762	0.229958
2,4,6,13	-0.00916576	0.0394526	0.816288	-0.186161	0.167829
2,4,6,14	0.0141251	0.0394254	0.72014	-0.162748	0.190998
2,4,6,15	-0.0122451	0.0394243	0.756108	-0.189113	0.164623
2,4,6,16	0.02497	0.039436	0.52662	-0.151951	0.201891
2,4,7,8	0.55213	0.0394964	2.47082e-44	0.374938	0.729321
2,4,7,9	-0.0412941	0.0394774	0.295556	-0.2184	0.135812
2,4,7,10	0.596081	0.0395252	2.71293e-51	0.41876	0.773402
2,4,7,11	1.0191	0.0395113	7.40067e-146	0.841845	1.19636
2,4,7,12	0.0720748	0.0394773	0.0678964	-0.105031	0.249181
2,4,7,13	-0.0806107	0.039491	0.0412311	-0.257778	0.0965565
2,4,7,14	-0.0601326	0.0394661	0.127602	-0.237188	0.116923
2,4,7,15	0.361151	0.0394739	5.92449e-20	0.18406	0.538241
2,4,7,16	-0.0969376	0.0394903	0.0141026	-0.274102	0.0802269
2,4,8,9	-0.0482196	0.0394326	0.221396	-0.225125	0.128686
2,4,8,10	0.0924515	0.0395143	0.019303	-0.0848206	0.269724
2,4,8,11	0.0979232	0.03945	0.0130599	-0.0790602	0.274907
2,4,8,12	-0.138721	0.0394243	0.00043407	-0.315589	0.0381474
2,4,8,13	0.00496785	0.0394395	0.899763	-0.171969	0.181904
2,4,8,14	-0.0236578	0.0394123	0.548332	-0.200472	0.153156
2,4,8,15	0.037248	0.0394149	0.344651	-0.139578	0.214074
2,4,8,16	-0.0668058	0.0394239	0.0901656	-0.243672	0.11006
2,4,9,10	0.0613769	0.03948	0.120039	-0.115741	0.238495
2,4,9,11	0.0244418	0.0394319	0.53536	-0.15246	0.201344
2,4,9,12	0.0431155	0.0394139	0.273996	-0.133706	0.219937
2,4,9,13	-0.0266229	0.0394332	0.49959	-0.203531	0.150285
2,4,9,14	0.0302525	0.0394103	0.442709	-0.146553	0.207058
2,4,9,15	0.0770159	0.0394139	0.0507026	-0.0998056	0.253837
2,4,9,16	-0.0450512	0.0394225	0.253136	-0.221911	0.131809
2,4,10,11	0.70599	0.0394799	2.54216e-71	0.528873	0.883108
2,4,10,12	0.0708876	0.0394826	0.0725934	-0.106242	0.248017
2,4,10,13	-0.0220551	0.0394895	0.576502	-0.199216	0.155106
2,4,10,14	0.107932	0.0394602	0.00623583	-0.069097	0.284961
2,4,10,15	-0.0877539	0.0394667	0.0261867	-0.264812	0.0893047
2,4,10,16	0.263962	0.0394876	2.33569e-11	0.0868095	0.441114
2,4,11,12	0.112262	0.0394314	0.00441449	-0.0646376	0.289163
2,4,11,13	-0.0549986	0.0394479	0.16326	-0.231972	0.121975
2,4,11,14	0.00818897	0.0394256	0.835459	-0.168685	0.185063
2,4,11,15	-0.230225	0.0394291	5.28115e-09	-0.407114	-0.0533352
2,4,11,16	0.363743	0.0394377	2.97788e-20	0.186815	0.540671
2,4,12,13	-0.0043804	0.0394255	0.911533	-0.181254	0.172493
2,4,12,14	-0.0103998	0.0394017	0.791826	-0.187166	0.166367
2,4,12,15	0.069055	0.0394087	0.0797313	-0.107743	0.245853
2,4,12,16	-0.0364986	0.0394195	0.354501	-0.213345	0.140348
2,4,13,14	-0.0266309	0.0394304	0.49943	-0.203526	0.150265
2,4,13,15	-0.0649438	0.0394208	0.0994713	-0.241796	0.111909
2,4,13,16	-0.0207296	0.0394321	0.599096	-0.197633	0.156174
2,4,14,15	0.0453688	0.0394015	0.249552	-0.131397	0.222135
2,4,14,16	0.0332732	0.0394047	0.398452	-0.143507	0.210054
2,4,15,16	-0.194118	0.0394185	8.48014e-07	-0.37096	-0.0172753
2,5,6,7	-0.0955052	0.0394636	0.0155201	-0.27255	0.0815393
2,5,6,8	0.00305953	0.0393924	0.938092	-0.173666	0.179785
2,5,6,9	0.0271393	0.0393851	0.490779	-0.149553	0.203832
2,5,6,10	0.0638753	0.0394253	0.105204	-0.112997	0.240748
2,5,6,11	0.079612	0.0393979	0.043314	-0.0971379	0.256362
2,5,6,12	-0.0239122	0.0393812	0.543722	-0.200587	0.152763
2,5,6,13	-0.00225422	0.0393997	0.954375	-0.179012	0.174503
2,5,6,14	0.00354799	0.0393769	0.928205	-0.173108	0.180204
2,5,6,15	0.045075	0.0393748	0.25231	-0.131571	0.221721
2,5,6,16	-0.0119316	0.0393924	0.761974	-0.188657	0.164793
2,5,7,8	0.0263212	0.0394732	0.504895	-0.150766	0.203409
2,5,7,9	0.0292717	0.039437	0.457946	-0.147654	0.206197
2,5,7,10	-0.0536261	0.0394901	0.174481	-0.230789	0.123537
2,5,7,11	0.60055	0.0394979	4.17334e-52	0.423352	0.777748
2,5,7,12	0.118333	0.0394559	0.00270872	-0.0586768	0.295343
2,5,7,13	-0.0976886	0.0394495	0.0132783	-0.27467	0.0792927
2,5,7,14	0.0595975	0.0394292	0.130665	-0.117293	0.236488
2,5,7,15	0.143293	0.0394411	0.00028029	-0.0336503	0.320236
2,5,7,16	0.300497	0.039455	2.6531e-14	0.123491	0.477502
2,5,8,9	0.0108435	0.0393749	0.783017	-0.165803	0.18749
2,5,8,10	0.237611	0.0394455	1.71439e-09	0.0606475	0.414574
2,5,8,11	0.0136726	0.0394041	0.728604	-0.163105	0.19045
2,5,8,12	-0.0853098	0.0393775	0.0302803	-0.261968	0.0913485
2,5,8,13	-0.0251618	0.039382	0.52288	-0.20184	0.151517
2,5,8,14	-0.00509068	0.0393581	0.897087	-0.181662	0.171481
2,5,8,15	-0.062921	0.0393621	0.109933	-0.23951	0.113668
2,5,8,16	-0.134123	0.0393727	0.000658467	-0.31076	0.0425135
2,5,9,10	0.110472	0.0394019	0.00505335	-0.0662956	0.287239
2,5,9,11	0.0584556	0.0393692	0.137601	-0.118165	0.235076
2,5,9,12	-0.0232687	0.0393565	0.554369	-0.199833	0.153295
2,5,9,13	0.00790445	0.0393662	0.840861	-0.168703	0.184512
2,5,9,14	-0.0592364	0.0393488	0.132222	-0.235766	0.117293
2,5,9,15	0.0376827	0.0393495	0.338248	-0.13885	0.214215
2,5,9,16	0.0755452	0.0393677	0.0549937	-0.101069	0.252159
2,5,10,11	-0.174172	0.0394081	9.90181e-06	-0.350968	0.0026233
2,5,10,12	-0.035824	0.0394161	0.363424	-0.212655	0.141007
2,5,10,13	0.0222284	0.0394127	0.572763	-0.154588	0.199044
2,5,10,14	-0.05659	0.0393892	0.150813	-0.233301	0.120121
2,5,10,15	0.00413873	0.0393899	0.91632	-0.172575	0.180853
2,5,10,16	0.0520446	0.0394169	0.18672	-0.124791	0.22888
2,5,11,12	0.148748	0.0393837	0.000158962	-0.0279382	0.325434
2,5,11,13	-0.0248084	0.0393875	0.528792	-0.201511	0.151895
2,5,11,14	0.00123653	0.0393718	0.974945	-0.175396	0.177869
2,5,11,15	0.0285326	0.0393679	0.468598	-0.148083	0.205148
2,5,11,16	-0.133459	0.0393857	0.000703211	-0.310154	0.0432362
2,5,12,13	0.0556077	0.03937	0.157826	-0.121017	0.232232
2,5,12,14	-0.0180057	0.0393525	0.647278	-0.194552	0.15854
2,5,12,15	0.0623914	0.0393621	0.112957	-0.114198	0.23898
2,5,12,16	0.0356327	0.0393703	0.365434	-0.140993	0.212259
2,5,13,14	-0.0291283	0.039367	0.459353	-0.205739	0.147483
2,5,13,15	0.000815333	0.0393551	0.983471	-0.175742	0.177373
2,5,13,16	-0.0244234	0.0393759	0.535087	-0.201075	0.152228
2,5,14,15	-0.0330547	0.0393441	0.400832	-0.209563	0.143454
2,5,14,16	-0.0522463	0.0393536	0.184311	-0.228797	0.124305
2,5,15,16	-0.0330621	0.0393605	0.400923	-0.209644	0.14352
2,6,7,8	-0.0172656	0.0393859	0.66112	-0.193962	0.15943
2,6,7,9	0.0135997	0.0393766	0.729814	-0.163054	0.190254
2,6,7,10	-0.0269819	0.0394247	0.493731	-0.203852	0.149888
2,6,7,11	0.0890193	0.0393854	0.0238119	-0.0876742	0.265713
2,6,7,12	-0.0107965	0.0393689	0.783901	-0.187416	0.165823
2,6,7,13	-0.00504732	0.0393946	0.898053	-0.181782	0.171688
2,6,7,14	-0.0200996	0.0393676	0.609659	-0.196714	0.156514
2,6,7,15	0.0126757	0.0393765	0.747521	-0.163978	0.189329
2,6,7,16	0.00239	0.0393843	0.951611	-0.174299	0.179079
2,6,8,9	0.0719352	0.0393167	0.06731	-0.10445	0.248321
2,6,8,10	0.0131631	0.039376	0.738161	-0.163488	0.189814
2,6,8,11	-0.0488008	0.0392962	0.214288	-0.225094	0.127492
2,6,8,12	0.0149676	0.0393	0.703312	-0.161343	0.191278
2,6,8,13	-0.0135724	0.0393269	0.730008	-0.190003	0.162859
2,6,8,14	-0.0260425	0.0393026	0.507579	-0.202365	0.15028
2,6,8,15	-0.0514581	0.0393012	0.190429	-0.227774	0.124858
2,6,8,16	-0.0405125	0.0393046	0.30267	-0.216844	0.135818
2,6,9,10	0.00585319	0.03936	0.881784	-0.170726	0.182433
2,6,9,11	-0.0377674	0.0392903	0.336436	-0.214034	0.138499
2,6,9,12	0.0483642	0.0393019	0.218485	-0.127955	0.224683
2,6,9,13	-0.0309491	0.0393326	0.431369	-0.207406	0.145508
2,6,9,14	-0.00136013	0.0393119	0.9724	-0.177724	0.175004
2,6,9,15	-0.0225882	0.0393095	0.565548	-0.198941	0.153765
2,6,9,16	-0.00289335	0.0393209	0.941343	-0.179298	0.173511
2,6,10,11	-0.0374334	0.0393284	0.341194	-0.213871	0.139005
2,6,10,12	-0.0436214	0.0393477	0.2676	-0.220146	0.132903
2,6,10,13	0.0139375	0.039375	0.723365	-0.16271	0.190585
2,6,10,14	-0.00522706	0.0393453	0.894312	-0.181741	0.171287
2,6,10,15	0.00551802	0.0393484	0.888475	-0.17101	0.182046
2,6,10,16	0.0206607	0.0393627	0.599669	-0.155931	0.197252
2,6,11,12	0.00621776	0.0392804	0.874227	-0.170005	0.18244
2,6,11,13	0.0212241	0.0393116	0.589272	-0.155139	0.197587
2,6,11,14	0.00458149	0.0392895	0.907171	-0.171682	0.180845
2,6,11,15	0.0232092	0.0392853	0.554666	-0.153035	0.199454
2,6,11,16	-0.000336285	0.0392958	0.993172	-0.176628	0.175955
2,6,12,13	-0.0430604	0.039316	0.273417	-0.219443	0.133322
2,6,12,14	0.0491908	0.0392954	0.21064	-0.127099	0.225481
2,6,12,15	0.0083839	0.0392987	0.831064	-0.167921	0.184688
2,6,12,16	-0.031135	0.0393067	0.428303	-0.207476	0.145205
2,6,13,14	0.00949301	0.0393331	0.809285	-0.166966	0.185952
2,6,13,15	0.0294612	0.0393227	0.453729	-0.146951	0.205874
2,6,13,16	-0.0275918	0.0393336	0.483005	-0.204053	0.148869
2,6,14,15	-0.0066281	0.0393032	0.86608	-0.182953	0.169697
2,6,14,16	-0.0151609	0.0393103	0.699741	-0.191517	0.161196
2,6,15,16	0.0344728	0.0393115	0.380536	-0.141889	0.210835
2,7,8,9	-0.00314551	0.0393744	0.936327	-0.17979	0.173499
2,7,8,10	-0.463561	0.0394504	7.64319e-32	-0.640546	-0.286576
2,7,8,11	0.251466	0.0393882	1.73518e-10	0.0747595	0.428172
2,7,8,12	0.0198072	0.0393732	0.614921	-0.156831	0.196446
2,7,8,13	0.00290189	0.0393848	0.941265	-0.173789	0.179593
2,7,8,14	0.0184616	0.0393586	0.639027	-0.158112	0.195035
2,7,8,15	-0.0771686	0.0393716	0.0499997	-0.2538	0.099463
2,7,8,16	0.0734364	0.0393746	0.0621767	-0.103209	0.250082
2,7,9,10	-0.049621	0.0394057	0.207951	-0.226406	0.127164
2,7,9,11	-0.0109202	0.0393608	0.781445	-0.187503	0.165663
2,7,9,12	-0.0695255	0.0393505	0.0772626	-0.246063	0.107012
2,7,9,13	0.0189009	0.0393671	0.631144	-0.15771	0.195512
2,7,9,14	-0.0277138	0.0393459	0.481209	-0.20423	0.148802
2,7,9,15	-0.00221598	0.0393578	0.9551	-0.178786	0.174354
2,7,9,16	-0.0572406	0.0393653	0.145927	-0.233844	0.119363
2,7,10,11	0.116283	0.0393982	0.00316374	-0.0604677	0.293035
2,7,10,12	-0.091339	0.0394128	0.0204802	-0.268156	0.0854775
2,7,10,13	0.10871	0.0394185	0.00582026	-0.0681321	0.285552
2,7,10,14	-0.0727639	0.0393913	0.0647222	-0.249484	0.103956
2,7,10,15	0.119453	0.039409	0.00243774	-0.0573469	0.296252
2,7,10,16	-0.520598	0.0394215	9.27917e-40	-0.697453	-0.343742
2,7,11,12	0.00138183	0.0393687	0.972	-0.175237	0.178001
2,7,11,13	-0.0175108	0.0393825	0.656585	-0.194191	0.15917
2,7,11,14	-0.0930182	0.0393614	0.0181219	-0.269604	0.0835676
2,7,11,15	0.276562	0.0393741	2.18085e-12	0.099919	0.453205
2,7,11,16	-0.347112	0.0393768	1.22828e-18	-0.523766	-0.170457
2,7,12,13	-0.0589334	0.0393667	0.134389	-0.235543	0.117676
2,7,12,14	0.037906	0.0393449	0.335337	-0.138606	0.214418
2,7,12,15	0.0312127	0.0393634	0.427818	-0.145382	0.207807
2,7,12,16	-0.0103192	0.0393706	0.793243	-0.186946	0.166308
2,7,13,14	-0.00417605	0.0393672	0.91552	-0.180788	0.172436
2,7,13,15	0.0128289	0.0393696	0.744533	-0.163794	0.189452
2,7,13,16	-0.0276289	0.0393767	0.482896	-0.204284	0.149026
2,7,14,15	-0.0635536	0.0393522	0.106317	-0.240098	0.112991
2,7,14,16	-0.0609597	0.0393514	0.121361	-0.237501	0.115581
2,7,15,16	0.202925	0.0393706	2.55538e-07	0.0262975	0.379552
2,8,9,10	0.152902	0.0393628	0.000102681	-0.0236897	0.329495
2,8,9,11	-0.0260852	0.0392837	0.50668	-0.202323	0.150152
2,8,9,12	-0.0159232	0.0392888	0.685268	-0.192183	0.160337
2,8,9,13	-0.0178166	0.0393076	0.650363	-0.194161	0.158528
2,8,9,14	0.0231354	0.0392868	0.555942	-0.153116	0.199387
2,8,9,15	0.00468849	0.0392938	0.905023	-0.171594	0.180971
2,8,9,16	0.0116737	0.0392934	0.766399	-0.164607	0.187954
2,8,10,11	-0.365097	0.0393459	1.76595e-20	-0.541613	-0.18858
2,8,10,12	0.201746	0.0393685	2.99207e-07	0.0251284	0.378364
2,8,10,13	-0.0235299	0.0393738	0.550107	-0.200171	0.153112
2,8,10,14	0.0190628	0.039343	0.628012	-0.15744	0.195566
2,8,10,15	0.0313774	0.0393559	0.425297	-0.145184	0.207939
2,8,10,16	0.307513	0.0393639	5.72181e-15	0.130916	0.48411
2,8,11,12	-0.068591	0.0392807	0.0807856	-0.244815	0.107633
2,8,11,13	0.0336126	0.0392967	0.392358	-0.142683	0.209908
2,8,11,14	0.0147471	0.0392749	0.707302	-0.161451	0.190945
2,8,11,15	-0.0582246	0.0392802	0.138268	-0.234446	0.117997
2,8,11,16	-0.159089	0.0392767	5.11797e-05	-0.335295	0.0171164
2,8,12,13	6.24098e-05	0.0393028	0.998733	-0.176261	0.176386
2,8,12,14	-0.0110349	0.0392755	0.778742	-0.187235	0.165166
2,8,12,15	-0.00647179	0.0392873	0.869157	-0.182725	0.169782
2,8,12,16	0.0382482	0.0392864	0.330272	-0.138001	0.214498
2,8,13,14	0.0443553	0.0393015	0.259075	-0.131962	0.220673
2,8,13,15	-0.0414835	0.0392941	0.291101	-0.217767	0.1348
2,8,13,16	0.00714059	0.0393005	0.855825	-0.169172	0.183453
2,8,14,15	0.0104288	0.0392757	0.790603	-0.165773	0.18663
2,8,14,16	0.030999	0.0392726	0.429922	-0.145188	0.207186
2,8,15,16	0.0296289	0.0392854	0.450735	-0.146616	0.205874
2,9,10,11	-0.134132	0.0393109	0.000645141	-0.310491	0.0422275
2,9,10,12	0.16909	0.0393311	1.71752e-05	-0.00736038	0.34554
2,9,10,13	0.0482222	0.0393488	0.220389	-0.128307	0.224751
2,9,10,14	-0.0153059	0.0393267	0.69713	-0.191736	0.161124
2,9,10,15	0.122492	0.039335	0.00184616	-0.0539756	0.29896
2,9,10,16	0.0812268	0.0393434	0.0389692	-0.0952784	0.257732
2,9,11,12	0.0790699	0.0392624	0.0440264	-0.0970719	0.255212
2,9,11,13	-0.0075231	0.0392842	0.848131	-0.183763	0.168716
2,9,11,14	0.0396154	0.0392664	0.313032	-0.136544	0.215775
2,9,11,15	-0.0334623	0.0392691	0.394147	-0.209634	0.14271
2,9,11,16	0.0673574	0.0392742	0.086341	-0.108838	0.243552
2,9,12,13	0.0306454	0.0392953	0.435468	-0.145644	0.206935
2,9,12,14	-0.0451915	0.0392762	0.249899	-0.221395	0.131012
2,9,12,15	0.0432112	0.0392845	0.271356	-0.13303	0.219452
2,9,12,16	0.0191891	0.0392878	0.625251	-0.157067	0.195445
2,9,13,14	-0.071686	0.0393061	0.0681897	-0.248024	0.104652
2,9,13,15	-0.0366607	0.039298	0.350881	-0.212962	0.139641
2,9,13,16	0.00629365	0.0393068	0.87279	-0.170047	0.182635
2,9,14,15	-0.0280137	0.0392815	0.475755	-0.204241	0.148214
2,9,14,16	-0.00978954	0.039284	0.803208	-0.186028	0.166449
2,9,15,16	-0.0418984	0.0392938	0.286299	-0.218181	0.134384
2,10,11,12	-0.102617	0.0393095	0.00904349	-0.27897	0.0737358
2,10,11,13	0.0793288	0.0393296	0.0436976	-0.0971145	0.255772
2,10,11,14	0.0453807	0.0393038	0.248254	-0.130947	0.221709
2,10,11,15	-0.195469	0.039311	6.63278e-07	-0.371829	-0.0191094
2,10,11,16	-0.0570314	0.0393196	0.146936	-0.23343	0.119367
2,10,12,13	0.0386707	0.0393468	0.325701	-0.13785	0.215191
2,10,12,14	-0.0307522	0.0393199	0.434158	-0.207152	0.145648
2,10,12,15	0.0800294	0.0393364	0.0419072	-0.0964445	0.256503
2,10,12,16	-0.0457678	0.039345	0.244735	-0.22228	0.130744
2,10,13,14	0.00697664	0.0393457	0.85926	-0.169539	0.183492
2,10,13,15	-0.0480821	0.0393406	0.221637	-0.224575	0.12841
2,10,13,16	0.0706701	0.039354	0.0725385	-0.105882	0.247223
2,10,14,15	0.044559	0.0393195	0.257113	-0.131839	0.220957
2,10,14,16	0.00485944	0.0393246	0.901654	-0.171561	0.18128
2,10,15,16	-0.130095	0.039345	0.00094523	-0.306607	0.0464176
2,11,12,13	0.00197767	0.0392825	0.959848	-0.174254	0.17821
2,11,12,14	0.044641	0.0392631	0.255555	-0.131504	0.220786
2,11,12,15	-0.0486566	0.0392749	0.215398	-0.224855	0.127541
2,11,12,16	0.0571628	0.039274	0.14554	-0.119031	0.233357
2,11,13,14	0.0278613	0.0392938	0.478296	-0.148421	0.204144
2,11,13,15	-0.121893	0.0392827	0.00191674	-0.298126	0.0543393
2,11,13,16	-0.0472154	0.0392906	0.229486	-0.223484	0.129053
2,11,14,15	0.0387358	0.039268	0.323918	-0.137431	0.214903
2,11,14,16	0.0812507	0.0392684	0.0385402	-0.0949181	0.257419
2,11,15,16	-0.23374	0.039276	2.67705e-09	-0.409943	-0.0575372
2,12,13,14	0.0201436	0.0392961	0.608226	-0.156149	0.196437
2,12,13,15	0.0287759	0.039295	0.463986	-0.147512	0.205064
2,12,13,16	-0.00196176	0.0393012	0.960189	-0.178277	0.174354
2,12,14,15	-0.0172535	0.0392781	0.660471	-0.193466	0.158959
2,12,14,16	-0.0472966	0.0392768	0.228523	-0.223503	0.12891
2,12,15,16	0.0494549	0.0392939	0.208184	-0.126828	0.225738
2,13,14,15	0.0548323	0.0392988	0.16294	-0.121473	0.231137
2,13,14,16	-0.00895235	0.0393037	0.819823	-0.185279	0.167375
2,13,15,16	-0.129553	0.039298	0.000978956	-0.305854	0.0467487
2,14,15,16	0.00430169	0.039279	0.912793	-0.171914	0.180518
3,4,5,6	-0.1387	0.039522	0.000449394	-0.316006	0.0386063
3,4,5,7	-1.70387	0.0395236	0	-1.88119	-1.52656
3,4,5,8	-0.892695	0.0395298	1.99665e-112	-1.07004	-0.715353
3,4,5,9	-0.194207	0.0395167	8.92367e-07	-0.37149	-0.0169238
3,4,5,10	-0.219895	0.0395806	2.77837e-08	-0.397465	-0.042326
3,4,5,11	-2.4517	0.0395567	0	-2.62917	-2.27424
3,4,5,12	-0.193409	0.0395147	9.87688e-07	-0.370683	-0.0161354
3,4,5,13	-0.110361	0.0395193	0.00523039	-0.287656	0.0669327
3,4,5,14	0.103088	0.0395012	0.00906352	-0.0741253	0.280301
3,4,5,15	-0.0359469	0.0394938	0.362726	-0.213127	0.141233
3,4,5,16	-0.502096	0.0395347	6.6254e-37	-0.679459	-0.324732
3,4,6,7	-0.062551	0.0394871	0.11318	-0.239701	0.114599
3,4,6,8	-0.0203887	0.0394697	0.605461	-0.197461	0.156683
3,4,6,9	-0.0419148	0.0394852	0.288453	-0.219056	0.135227
3,4,6,10	-0.0293646	0.0395561	0.457877	-0.206824	0.148095
3,4,6,11	-0.106138	0.0395136	0.0072311	-0.283407	0.0711311
3,4,6,12	0.026932	0.0394599	0.494916	-0.150096	0.20396
3,4,6,13	-0.00960118	0.0394935	0.807923	-0.18678	0.167577
3,4,6,14	-0.0138422	0.0394669	0.725793	-0.190902	0.163217
3,4,6,15	-0.0178783	0.0394651	0.650539	-0.194929	0.159173
3,4,6,16	-0.0436539	0.0394896	0.268968	-0.220815	0.133507
3,4,7,8	0.556407	0.0394821	5.01836e-45	0.379279	0.733534
3,4,7,9	0.245199	0.0394787	5.30412e-10	0.0680865	0.422311
3,4,7,10	1.74953	0.0395417	0	1.57213	1.92692
3,4,7,11	-0.506337	0.0395156	1.55081e-37	-0.683614	-0.329059
3,4,7,12	-0.0316608	0.0394692	0.422461	-0.20873	0.145409
3,4,7,13	-0.00290083	0.0394882	0.94144	-0.180056	0.174254
3,4,7,14	0.045738	0.0394662	0.246495	-0.131318	0.222794
3,4,7,15	0.0130788	0.0394767	0.740417	-0.164025	0.190182
3,4,7,16	0.279156	0.0395021	1.60307e-12	0.101938	0.456373
3,4,8,9	0.196724	0.0394784	6.27647e-07	0.019613	0.373835
3,4,8,10	0.324467	0.0395724	2.4674e-16	0.146934	0.501999
3,4,8,11	-0.347659	0.0395176	1.43635e-18	-0.524946	-0.170372
3,4,8,12	0.167109	0.0394577	2.28766e-05	-0.00990903	0.344127
3,4,8,13	0.0323043	0.0394751	0.413163	-0.144792	0.2094
3,4,8,14	0.00293142	0.0394513	0.940768	-0.174058	0.179921
3,4,8,15	0.0690944	0.0394578	0.0799352	-0.107924	0.246113
3,4,8,16	0.0305677	0.0394832	0.438819	-0.146565	0.2077
3,4,9,10	0.0370738	0.0395561	0.348635	-0.140386	0.214533
3,4,9,11	-0.0118014	0.0395158	0.765208	-0.18908	0.165477
3,4,9,12	0.0530622	0.0394615	0.178741	-0.123973	0.230097
3,4,9,13	-0.00614667	0.0394865	0.876298	-0.183294	0.171
3,4,9,14	0.022749	0.0394643	0.564317	-0.154299	0.199797
3,4,9,15	0.0958329	0.0394649	0.0151726	-0.0812175	0.272883
3,4,9,16	0.0383693	0.0394905	0.331249	-0.138796	0.215534
3,4,10,11	0.573923	0.0395957	1.59362e-47	0.396286	0.751561
3,4,10,12	0.128673	0.0395451	0.00113926	-0.048737	0.306083
3,4,10,13	-0.064185	0.0395642	0.104745	-0.241681	0.113311
3,4,10,14	0.0433151	0.0395367	0.273273	-0.134057	0.220688
3,4,10,15	0.115119	0.0395411	0.00359982	-0.0622733	0.292511
3,4,10,16	0.258708	0.0395751	6.32419e-11	0.0811627	0.436252
3,4,11,12	-0.295831	0.0394988	7.00727e-14	-0.473033	-0.118628
3,4,11,13	0.00659362	0.0395232	0.867505	-0.170718	0.183905
3,4,11,14	0.00966962	0.039503	0.806626	-0.167552	0.186891
3,4,11,15	-0.100941	0.0395065	0.0106197	-0.278178	0.0762957
3,4,11,16	-0.0412865	0.0395327	0.296322	-0.218641	0.136068
3,4,12,13	0.02754	0.0394663	0.485299	-0.149516	0.204596
3,4,12,14	0.0815396	0.0394469	0.0387318	-0.0954299	0.258509
3,4,12,15	0.0136121	0.0394577	0.730111	-0.163406	0.19063
3,4,12,16	-0.0219227	0.0394729	0.578634	-0.199009	0.155164
3,4,13,14	0.0446073	0.039479	0.258523	-0.132506	0.221721
3,4,13,15	-0.0376975	0.0394671	0.339499	-0.214758	0.139363
3,4,13,16	-0.0373024	0.0394889	0.344852	-0.21446	0.139856
3,4,14,15	0.0503698	0.0394494	0.201672	-0.126611	0.227351
3,4,14,16	-0.0311113	0.0394645	0.430503	-0.20816	0.145937
3,4,15,16	0.0114823	0.039479	0.771171	-0.165631	0.188596
3,5,6,7	0.0215167	0.0393727	0.584733	-0.15512	0.198153
3,5,6,8	-0.0452153	0.0393556	0.250607	-0.221775	0.131345
3,5,6,9	0.00522013	0.0393611	0.894493	-0.171364	0.181805
3,5,6,10	-0.0740844	0.0394008	0.0600756	-0.250847	0.102678
3,5,6,11	-0.0363548	0.0393792	0.355909	-0.213021	0.140311
3,5,6,12	0.0226187	0.0393438	0.565362	-0.153888	0.199126
3,5,6,13	-0.0114524	0.039369	0.77113	-0.188072	0.165168
3,5,6,14	0.00841509	0.0393476	0.830653	-0.168109	0.184939
3,5,6,15	-0.0213766	0.0393439	0.586907	-0.197884	0.155131
3,5,6,16	0.00844047	0.0393694	0.830242	-0.168182	0.185062
3,5,7,8	0.447824	0.0393741	6.09851e-30	0.271182	0.624467
3,5,7,9	0.135991	0.0393567	0.000549966	-0.0405735	0.312556
3,5,7,10	-0.540081	0.0394143	1.14392e-42	-0.716904	-0.363258
3,5,7,11	1.26456	0.0393961	4.64625e-224	1.08782	1.4413
3,5,7,12	0.129747	0.039363	0.000980753	-0.0468463	0.30634
3,5,7,13	0.0571484	0.0393614	0.146538	-0.119438	0.233734
3,5,7,14	-0.0138745	0.0393453	0.724363	-0.190388	0.162639
3,5,7,15	0.0331329	0.0393507	0.399797	-0.143405	0.209671
3,5,7,16	0.0912223	0.0393776	0.0205289	-0.0854364	0.267881
3,5,8,9	0.007869	0.0393473	0.841491	-0.168654	0.184392
3,5,8,10	-0.219193	0.0394217	2.70652e-08	-0.39605	-0.0423366
3,5,8,11	0.524751	0.0393797	1.89359e-40	0.348083	0.701419
3,5,8,12	-0.12901	0.0393419	0.00104162	-0.305508	0.0474883
3,5,8,13	0.0208054	0.0393472	0.59697	-0.155717	0.197328
3,5,8,14	0.00726751	0.0393284	0.853394	-0.169171	0.183706
3,5,8,15	-0.0272542	0.0393267	0.488299	-0.203684	0.149176
3,5,8,16	-0.170845	0.0393523	1.41808e-05	-0.34739	0.00570021
3,5,9,10	0.186324	0.0393891	2.24691e-06	0.00961323	0.363034
3,5,9,11	0.155072	0.0393651	8.18051e-05	-0.0215303	0.331675
3,5,9,12	0.0352249	0.0393306	0.370465	-0.141223	0.211673
3,5,9,13	-0.00897379	0.0393472	0.819595	-0.185496	0.167548
3,5,9,14	-0.00151137	0.0393328	0.969349	-0.177969	0.174946
3,5,9,15	0.0694477	0.0393285	0.0774288	-0.106991	0.245886
3,5,9,16	-0.0588367	0.0393545	0.134908	-0.235392	0.117718
3,5,10,11	0.1931	0.0394199	9.6814e-07	0.0162517	0.369948
3,5,10,12	0.100359	0.039391	0.0108442	-0.0763598	0.277078
3,5,10,13	0.0129572	0.039394	0.742222	-0.163775	0.189689
3,5,10,14	-0.000810724	0.0393726	0.983572	-0.177447	0.175825
3,5,10,15	0.00474715	0.0393727	0.904032	-0.17189	0.181384
3,5,10,16	0.0887248	0.0394087	0.0243639	-0.0880733	0.265523
3,5,11,12	0.231059	0.0393663	4.39624e-09	0.054451	0.407667
3,5,11,13	-0.0554946	0.0393747	0.158724	-0.23214	0.121151
3,5,11,14	0.0448675	0.0393623	0.25435	-0.131722	0.221457
3,5,11,15	0.0518634	0.0393582	0.1876	-0.124708	0.228435
3,5,11,16	0.226752	0.0393826	8.57138e-09	0.0500714	0.403433
3,5,12,13	-0.0476622	0.0393394	0.225684	-0.224149	0.128825
3,5,12,14	0.0424339	0.0393238	0.280552	-0.133983	0.218851
3,5,12,15	0.0634771	0.039329	0.106532	-0.112963	0.239918
3,5,12,16	0.0189206	0.0393481	0.630625	-0.157606	0.195447
3,5,13,14	0.0636949	0.0393479	0.105504	-0.112831	0.240221
3,5,13,15	-0.0384107	0.0393293	0.328749	-0.214853	0.138031
3,5,13,16	0.0103735	0.0393564	0.792106	-0.16619	0.186937
3,5,14,15	0.0331606	0.0393173	0.399003	-0.143228	0.209549
3,5,14,16	0.0719583	0.0393385	0.0673737	-0.104525	0.248442
3,5,15,16	-0.195709	0.0393413	6.55548e-07	-0.372205	-0.0192135
3,6,7,8	-0.0099857	0.0393028	0.799442	-0.186309	0.166337
3,6,7,9	0.0229862	0.0393131	0.558755	-0.153383	0.199355
3,6,7,10	0.00249807	0.0393729	0.949411	-0.174139	0.179136
3,6,7,11	-0.0544907	0.0393249	0.165858	-0.230913	0.121932
3,6,7,12	0.0376848	0.0392929	0.337525	-0.138594	0.213964
3,6,7,13	-0.0334448	0.0393228	0.39504	-0.209857	0.142968
3,6,7,14	-0.00592237	0.0392979	0.880209	-0.182223	0.170379
3,6,7,15	-0.0325526	0.039303	0.407535	-0.208877	0.143772
3,6,7,16	0.0137055	0.0393239	0.727444	-0.162712	0.190123
3,6,8,9	0.0914562	0.0392908	0.0199329	-0.0848131	0.267726
3,6,8,10	0.0977868	0.0393609	0.0129812	-0.0787971	0.274371
3,6,8,11	-0.160722	0.0392896	4.30666e-05	-0.336985	0.0155419
3,6,8,12	0.0698389	0.0392668	0.0753149	-0.106323	0.246001
3,6,8,13	-0.0284558	0.0392953	0.468974	-0.204745	0.147833
3,6,8,14	0.028429	0.0392724	0.469134	-0.147758	0.204616
3,6,8,15	-0.00077835	0.0392692	0.984186	-0.176951	0.175394
3,6,8,16	0.0398681	0.039284	0.310172	-0.13637	0.216107
3,6,9,10	0.124389	0.0393587	0.00157646	-0.0521854	0.300962
3,6,9,11	-0.076791	0.0393063	0.0507466	-0.25313	0.0995477
3,6,9,12	0.022406	0.0392812	0.568408	-0.15382	0.198632
3,6,9,13	-0.0212402	0.039317	0.589041	-0.197627	0.155146
3,6,9,14	0.0285816	0.0392957	0.467016	-0.14771	0.204873
3,6,9,15	0.00508062	0.0392943	0.897123	-0.171204	0.181365
3,6,9,16	-0.00288509	0.039311	0.941495	-0.179245	0.173475
3,6,10,11	-0.140812	0.0393626	0.000347452	-0.317403	0.0357796
3,6,10,12	0.0387472	0.0393342	0.32459	-0.137717	0.215211
3,6,10,13	-0.00333235	0.0393676	0.932542	-0.179946	0.173282
3,6,10,14	0.0651162	0.0393398	0.0978845	-0.111373	0.241605
3,6,10,15	-0.0569067	0.0393424	0.148057	-0.233407	0.119594
3,6,10,16	0.0209737	0.0393617	0.594142	-0.155614	0.197561
3,6,11,12	-0.0520084	0.0392835	0.185533	-0.228245	0.124228
3,6,11,13	-0.0188601	0.039321	0.631482	-0.195265	0.157545
3,6,11,14	0.0198532	0.0393008	0.613448	-0.156461	0.196168
3,6,11,15	-0.0250208	0.0392971	0.524317	-0.201318	0.151277
3,6,11,16	0.0180639	0.0393121	0.645877	-0.158301	0.194428
3,6,12,13	-0.0674116	0.0392898	0.0862132	-0.243676	0.108853
3,6,12,14	0.0143847	0.0392698	0.714139	-0.16179	0.19056
3,6,12,15	0.0509216	0.0392709	0.194748	-0.125258	0.227101
3,6,12,16	0.0387933	0.0392841	0.323399	-0.137446	0.215032
3,6,13,14	-0.0656925	0.0393149	0.0947406	-0.24207	0.110685
3,6,13,15	-0.02153	0.0393035	0.583839	-0.197856	0.154796
3,6,13,16	-0.0322642	0.0393169	0.411867	-0.208651	0.144122
3,6,14,15	-0.0142735	0.0392832	0.716346	-0.190509	0.161962
3,6,14,16	-0.0378	0.0392959	0.336087	-0.214092	0.138492
3,6,15,16	-0.00182658	0.0392969	0.962927	-0.178123	0.17447
3,7,8,9	0.139328	0.039302	0.000392814	-0.0369908	0.315648
3,7,8,10	-0.279473	0.0393887	1.3061e-12	-0.456181	-0.102765
3,7,8,11	0.9145	0.0393285	4.78208e-119	0.738062	1.09094
3,7,8,12	0.277267	0.0392906	1.72272e-12	0.100999	0.453536
3,7,8,13	-0.0269393	0.0393055	0.493105	-0.203275	0.149396
3,7,8,14	-0.0125121	0.0392821	0.750093	-0.188742	0.163718
3,7,8,15	0.110421	0.0392941	0.00495399	-0.0658628	0.286705
3,7,8,16	0.221483	0.0393091	1.76506e-08	0.0451314	0.397834
3,7,9,10	-0.202386	0.0393644	2.73665e-07	-0.378986	-0.0257869
3,7,9,11	0.39583	0.0393152	8.00237e-24	0.219451	0.572209
3,7,9,12	0.175602	0.0392851	7.83919e-06	-0.000641578	0.351846
3,7,9,13	0.0101842	0.0393053	0.795556	-0.16615	0.186518
3,7,9,14	0.0380797	0.0392871	0.332416	-0.138173	0.214332
3,7,9,15	0.071547	0.0392961	0.0686551	-0.104746	0.24784
3,7,9,16	0.0204533	0.0393135	0.602883	-0.155918	0.196824
3,7,10,11	0.817387	0.0393828	2.49751e-95	0.640705	0.994068
3,7,10,12	-0.0909995	0.0393597	0.0207815	-0.267578	0.0855789
3,7,10,13	0.0193323	0.0393726	0.623422	-0.157304	0.195968
3,7,10,14	-0.00697229	0.0393482	0.859356	-0.183499	0.169555
3,7,10,15	-0.217849	0.0393577	3.12388e-08	-0.394419	-0.0412801
3,7,10,16	0.00311903	0.039384	0.936877	-0.173568	0.179806
3,7,11,12	0.277149	0.0393097	1.80442e-12	0.100795	0.453502
3,7,11,13	0.000977201	0.0393274	0.980176	-0.175456	0.17741
3,7,11,14	0.000649185	0.0393105	0.986824	-0.175709	0.177007
3,7,11,15	0.0712819	0.0393233	0.0698814	-0.105133	0.247697
3,7,11,16	0.374394	0.0393359	1.83394e-21	0.197922	0.550866
3,7,12,13	0.00816552	0.0392919	0.835373	-0.168109	0.18444
3,7,12,14	0.0145944	0.0392746	0.710193	-0.161602	0.190791
3,7,12,15	0.146016	0.0392926	0.000202501	-0.0302613	0.322293
3,7,12,16	0.120282	0.0393051	0.00221278	-0.0560511	0.296615
3,7,13,14	-0.0453007	0.039302	0.249066	-0.22162	0.131019
3,7,13,15	-0.0334618	0.0392987	0.39451	-0.209766	0.142843
3,7,13,16	0.0220516	0.0393166	0.574887	-0.154333	0.198437
3,7,14,15	0.0261661	0.0392825	0.50535	-0.150066	0.202398
3,7,14,16	0.0513266	0.0392945	0.191489	-0.124959	0.227612
3,7,15,16	-0.211309	0.0393132	7.68806e-08	-0.387679	-0.034939
3,8,9,10	0.119893	0.0393604	0.00231984	-0.0566882	0.296475
3,8,9,11	0.171118	0.0392904	1.33174e-05	-0.0051497	0.347385
3,8,9,12	0.0655308	0.0392663	0.0951466	-0.110629	0.24169
3,8,9,13	-0.00394306	0.0392856	0.920052	-0.180189	0.172303
3,8,9,14	0.0164887	0.0392669	0.67455	-0.159673	0.192651
3,8,9,15	0.0349111	0.0392708	0.374015	-0.141268	0.211091
3,8,9,16	0.0448354	0.0392854	0.253761	-0.13141	0.221081
3,8,10,11	-0.352241	0.0393785	3.82815e-19	-0.528903	-0.175578
3,8,10,12	-0.133238	0.0393524	0.000710266	-0.309783	0.0433073
3,8,10,13	0.0393015	0.0393643	0.318088	-0.137298	0.215901
3,8,10,14	-0.0270716	0.039336	0.491321	-0.203544	0.149401
3,8,10,15	-0.0782351	0.0393473	0.0467807	-0.254758	0.0982874
3,8,10,16	-0.0924559	0.039367	0.0188495	-0.269067	0.0841554
3,8,11,12	0.184764	0.0392716	2.54757e-06	0.00858047	0.360947
3,8,11,13	0.171454	0.0392951	1.28377e-05	-0.00483467	0.347742
3,8,11,14	0.00749728	0.0392756	0.848613	-0.168704	0.183699
3,8,11,15	0.0380594	0.0392799	0.332585	-0.138161	0.21428
3,8,11,16	0.127031	0.039288	0.0012243	-0.049226	0.303287
3,8,12,13	-0.00489567	0.0392716	0.900792	-0.181079	0.171287
3,8,12,14	-0.00901536	0.03925	0.818333	-0.185102	0.167071
3,8,12,15	0.14005	0.0392593	0.000360973	-0.0360782	0.316178
3,8,12,16	-0.116713	0.0392682	0.0029579	-0.292881	0.0594546
3,8,13,14	0.0623447	0.0392785	0.112462	-0.113869	0.238559
3,8,13,15	-0.0789573	0.0392659	0.0443475	-0.255115	0.0972002
3,8,13,16	0.0404551	0.0392818	0.303076	-0.135774	0.216684
3,8,14,15	0.0321204	0.0392511	0.413172	-0.143971	0.208212
3,8,14,16	0.0353183	0.0392592	0.368327	-0.140809	0.211446
3,8,15,16	-0.134592	0.0392714	0.00061023	-0.310774	0.0415906
3,9,10,11	-0.422897	0.0393567	6.62346e-27	-0.599462	-0.246332
3,9,10,12	-0.0717253	0.0393311	0.0682131	-0.248175	0.104724
3,9,10,13	0.0130014	0.0393533	0.741116	-0.163548	0.189551
3,9,10,14	0.0025083	0.0393333	0.949153	-0.173952	0.178968
3,9,10,15	-0.060586	0.0393396	0.123547	-0.237074	0.115902
3,9,10,16	-0.00159306	0.039355	0.967711	-0.17815	0.174964
3,9,11,12	0.161525	0.0392763	3.91882e-05	-0.0146789	0.33773
3,9,11,13	-0.0134309	0.0393044	0.732567	-0.189761	0.162899
3,9,11,14	0.0349143	0.0392886	0.374189	-0.141345	0.211174
3,9,11,15	0.0542926	0.0392898	0.167023	-0.121972	0.230557
3,9,11,16	-0.00862128	0.0393007	0.826365	-0.184935	0.167693
3,9,12,13	0.000383136	0.0392768	0.992217	-0.175823	0.176589
3,9,12,14	0.00168955	0.0392613	0.965675	-0.174447	0.177826
3,9,12,15	0.0677316	0.039269	0.0845672	-0.10844	0.243903
3,9,12,16	0.0655169	0.0392758	0.0952972	-0.110685	0.241719
3,9,13,14	-0.0319445	0.0392963	0.41627	-0.208238	0.144349
3,9,13,15	-0.0138945	0.0392839	0.723569	-0.190133	0.162344
3,9,13,16	0.0276551	0.0392969	0.481592	-0.148641	0.203952
3,9,14,15	-0.00946101	0.0392714	0.809623	-0.185643	0.166721
3,9,14,16	0.0315018	0.0392789	0.422555	-0.144714	0.207718
3,9,15,16	0.0495969	0.0392877	0.206808	-0.126658	0.225852
3,10,11,12	-0.190936	0.0393447	1.21998e-06	-0.367447	-0.0144244
3,10,11,13	0.0285397	0.039369	0.468499	-0.14808	0.20516
3,10,11,14	-0.00603814	0.0393457	0.878033	-0.182554	0.170477
3,10,11,15	-0.161828	0.0393541	3.92607e-05	-0.338382	0.0147248
3,10,11,16	0.00390049	0.0393735	0.921088	-0.17274	0.180541
3,10,12,13	-0.0241913	0.0393398	0.538602	-0.20068	0.152298
3,10,12,14	0.00683006	0.0393146	0.86208	-0.169546	0.183206
3,10,12,15	-0.0182712	0.039328	0.642231	-0.194707	0.158165
3,10,12,16	-0.0356285	0.0393458	0.365193	-0.212145	0.140888
3,10,13,14	0.0242974	0.0393478	0.536906	-0.152228	0.200822
3,10,13,15	-0.0681334	0.0393404	0.0832981	-0.244625	0.108358
3,10,13,16	0.0226887	0.0393559	0.564279	-0.153872	0.19925
3,10,14,15	-0.00283827	0.0393196	0.942455	-0.179237	0.17356
3,10,14,16	-0.0143837	0.0393309	0.714584	-0.190833	0.162065
3,10,15,16	-0.088864	0.0393503	0.0239319	-0.2654	0.0876721
3,11,12,13	-0.0489949	0.0392883	0.21238	-0.225253	0.127263
3,11,12,14	0.0743388	0.0392732	0.058381	-0.101851	0.250529
3,11,12,15	0.0397189	0.0392844	0.311991	-0.136521	0.215959
3,11,12,16	0.114526	0.0392895	0.00355898	-0.0617369	0.29079
3,11,13,14	0.00511884	0.0393121	0.8964	-0.171246	0.181483
3,11,13,15	-0.087286	0.0392975	0.0263439	-0.263585	0.0890131
3,11,13,16	-0.104248	0.0393112	0.00800711	-0.280608	0.0721127
3,11,14,15	0.0406812	0.0392848	0.300418	-0.135561	0.216923
3,11,14,16	0.0676172	0.039294	0.0852924	-0.108666	0.243901
3,11,15,16	-0.495547	0.0393008	2.10485e-36	-0.671861	-0.319233
3,12,13,14	0.00655491	0.0392759	0.867454	-0.169647	0.182757
3,12,13,15	-0.00710397	0.0392702	0.856447	-0.183281	0.169073
3,12,13,16	0.00913665	0.0392801	0.816071	-0.167084	0.185358
3,12,14,15	0.0380729	0.0392556	0.332115	-0.138038	0.214184
3,12,14,16	0.00432459	0.0392615	0.912292	-0.171813	0.180463
3,12,15,16	0.040065	0.0392756	0.307686	-0.136136	0.216266
3,13,14,15	-0.0601532	0.0392853	0.125728	-0.236398	0.116091
3,13,14,16	-0.0441684	0.0392946	0.261003	-0.220455	0.132118
3,13,15,16	-0.0736706	0.0392861	0.0607661	-0.249919	0.102578
3,14,15,16	0.0500286	0.03927	0.202682	-0.126147	0.226205
4,5,6,7	0.0985306	0.0394948	0.0126065	-0.0786537	0.275715
4,5,6,8	-0.129979	0.0394642	0.000989779	-0.307026	0.0470683
4,5,6,9	0.00256021	0.0394693	0.948281	-0.17451	0.17963
4,5,6,10	-0.0289706	0.0394977	0.46327	-0.206168	0.148227
4,5,6,11	0.134335	0.0394826	0.000668458	-0.0427946	0.311465
4,5,6,12	0.0382304	0.0394615	0.332647	-0.138804	0.215265
4,5,6,13	-0.0501705	0.0394791	0.2038	-0.227284	0.126943
4,5,6,14	0.00259647	0.0394563	0.947532	-0.174415	0.179608
4,5,6,15	-0.024014	0.0394525	0.542738	-0.201009	0.152981
4,5,6,16	0.025034	0.0394806	0.526029	-0.152087	0.202155
4,5,7,8	0.295074	0.0394981	8.09745e-14	0.117875	0.472273
4,5,7,9	0.0195974	0.0394754	0.619581	-0.1575	0.196695
4,5,7,10	-1.02354	0.0395108	4.14137e-147	-1.2008	-0.846286
4,5,7,11	-1.98807	0.0395073	0	-2.16531	-1.81083
4,5,7,12	0.155291	0.0394867	8.40804e-05	-0.021857	0.33244
4,5,7,13	0.0553095	0.0394814	0.161249	-0.121815	0.232434
4,5,7,14	0.0154861	0.0394619	0.694741	-0.161551	0.192523
4,5,7,15	0.038767	0.0394713	0.326028	-0.138312	0.215846
4,5,7,16	0.134878	0.0395022	0.000639598	-0.0423401	0.312095
4,5,8,9	-0.0739957	0.0394595	0.0607664	-0.251022	0.103031
4,5,8,10	-0.1332	0.0395206	0.000751063	-0.3105	0.0440995
4,5,8,11	-1.2569	0.0394909	2.32243e-220	-1.43407	-1.07974
4,5,8,12	-0.140092	0.0394598	0.000385163	-0.31712	0.0369349
4,5,8,13	0.0414377	0.0394586	0.293651	-0.135584	0.21846
4,5,8,14	0.0423594	0.0394351	0.282759	-0.134557	0.219276
4,5,8,15	0.0145181	0.0394399	0.712794	-0.16242	0.191456
4,5,8,16	-0.0198615	0.0394624	0.614755	-0.196901	0.157178
4,5,9,10	-0.209805	0.0394849	1.07917e-07	-0.386944	-0.0326647
4,5,9,11	-0.542488	0.0394706	6.47085e-43	-0.719564	-0.365412
4,5,9,12	0.0170695	0.0394454	0.665207	-0.159893	0.194032
4,5,9,13	0.0126615	0.039454	0.748274	-0.16434	0.189663
4,5,9,14	0.0197018	0.0394348	0.617355	-0.157213	0.196617
4,5,9,15	-0.0285611	0.0394363	0.468925	-0.205483	0.148361
4,5,9,16	-0.00536882	0.0394631	0.891785	-0.182411	0.171673
4,5,10,11	-1.97641	0.0394909	0	-2.15358	-1.79924
4,5,10,12	-0.119927	0.0394952	0.00239455	-0.297113	0.0572593
4,5,10,13	0.00291728	0.0394919	0.941114	-0.174254	0.180089
4,5,10,14	-0.0130907	0.0394665	0.740123	-0.190148	0.163967
4,5,10,15	-0.126917	0.0394662	0.00130133	-0.303973	0.0501388
4,5,10,16	-0.239157	0.0395058	1.42424e-09	-0.416391	-0.0619231
4,5,11,12	-0.186671	0.0394852	2.27715e-06	-0.363813	-0.00952948
4,5,11,13	-0.0359077	0.0394772	0.363048	-0.213013	0.141198
4,5,11,14	-0.0591194	0.039462	0.134104	-0.236157	0.117918
4,5,11,15	0.103555	0.0394596	0.00868435	-0.0734716	0.280581
4,5,11,16	-0.478781	0.039493	8.76198e-34	-0.655958	-0.301605
4,5,12,13	0.0141465	0.0394565	0.719944	-0.162866	0.191159
4,5,12,14	0.0706092	0.0394402	0.0734134	-0.10633	0.247549
4,5,12,15	-0.0110265	0.0394471	0.779841	-0.187997	0.165944
4,5,12,16	0.0133625	0.0394666	0.734929	-0.163695	0.19042
4,5,13,14	0.0587925	0.0394536	0.136185	-0.118207	0.235792
4,5,13,15	0.0605296	0.0394405	0.124862	-0.116411	0.23747
4,5,13,16	-0.00801528	0.0394688	0.839074	-0.185083	0.169052
4,5,14,15	0.0325664	0.0394249	0.408786	-0.144304	0.209437
4,5,14,16	0.0385728	0.039447	0.328158	-0.138397	0.215543
4,5,15,16	0.341563	0.0394542	4.9583e-18	0.164561	0.518566
4,6,7,8	0.060171	0.0394311	0.127021	-0.116728	0.23707
4,6,7,9	0.0253651	0.0394301	0.520036	-0.151529	0.202259
4,6,7,10	-0.0662283	0.0394718	0.0933792	-0.24331	0.110853
4,6,7,11	-0.0500366	0.0394405	0.204567	-0.226977	0.126904
4,6,7,12	0.041205	0.0394174	0.295865	-0.135632	0.218042
4,6,7,13	0.00563176	0.0394402	0.886455	-0.171308	0.182571
4,6,7,14	0.0318903	0.0394137	0.41845	-0.14493	0.208711
4,6,7,15	-0.0140451	0.0394195	0.721619	-0.190892	0.162802
4,6,7,16	0.0149685	0.0394453	0.704338	-0.161994	0.191931
4,6,8,9	0.00410779	0.0394146	0.916995	-0.172717	0.180932
4,6,8,10	0.0718379	0.0394739	0.0687817	-0.105253	0.248929
4,6,8,11	0.00676139	0.0394156	0.863799	-0.170068	0.183591
4,6,8,12	0.0262137	0.0393972	0.505817	-0.150533	0.20296
4,6,8,13	-0.0126864	0.0394197	0.747583	-0.189534	0.164161
4,6,8,14	0.0228511	0.0393945	0.561877	-0.153883	0.199585
4,6,8,15	0.0302367	0.0393936	0.442757	-0.146494	0.206967
4,6,8,16	0.0666275	0.0394141	0.0909475	-0.110195	0.24345
4,6,9,10	-0.0491677	0.0394602	0.212766	-0.226197	0.127861
4,6,9,11	-0.0632611	0.039424	0.10858	-0.240128	0.113606
4,6,9,12	0.0022149	0.039408	0.955179	-0.17458	0.17901
4,6,9,13	-0.0106862	0.0394365	0.786413	-0.187609	0.166237
4,6,9,14	0.0380597	0.0394128	0.334214	-0.138757	0.214876
4,6,9,15	-0.0244115	0.0394095	0.535635	-0.201213	0.15239
4,6,9,16	-0.0179147	0.039434	0.649618	-0.194826	0.158997
4,6,10,11	-0.0683493	0.0394516	0.0831928	-0.24534	0.108641
4,6,10,12	-0.00588802	0.0394454	0.881341	-0.182851	0.171075
4,6,10,13	-0.0226649	0.0394689	0.565804	-0.199733	0.154403
4,6,10,14	-0.0295226	0.0394403	0.454138	-0.206463	0.147417
4,6,10,15	-0.0352463	0.0394386	0.371485	-0.212179	0.141686
4,6,10,16	-0.0058734	0.0394705	0.881708	-0.182949	0.171202
4,6,11,12	-0.0171845	0.0394118	0.66282	-0.193997	0.159628
4,6,11,13	0.00445055	0.0394398	0.910155	-0.172487	0.181388
4,6,11,14	-0.0371347	0.0394151	0.346123	-0.213962	0.139692
4,6,11,15	0.0759783	0.0394129	0.0538908	-0.100839	0.252795
4,6,11,16	-0.0382666	0.0394339	0.331852	-0.215178	0.138645
4,6,12,13	0.0310216	0.0394178	0.431288	-0.145817	0.207861
4,6,12,14	0.042026	0.0393952	0.286076	-0.134712	0.218763
4,6,12,15	0.025254	0.0393948	0.521493	-0.151482	0.20199
4,6,12,16	-0.0125655	0.0394164	0.749888	-0.189398	0.164267
4,6,13,14	0.039478	0.0394311	0.31674	-0.137421	0.216377
4,6,13,15	-0.0524543	0.0394171	0.183277	-0.22929	0.124382
4,6,13,16	-0.0485796	0.0394419	0.218076	-0.225527	0.128368
4,6,14,15	0.0013387	0.0393958	0.972893	-0.175402	0.178079
4,6,14,16	-0.0114814	0.0394169	0.770838	-0.188317	0.165354
4,6,15,16	-0.0399345	0.0394174	0.311007	-0.216772	0.136902
4,7,8,9	0.157586	0.0394256	6.42173e-05	-0.0192879	0.33446
4,7,8,10	0.0546885	0.0394899	0.166097	-0.122474	0.231851
4,7,8,11	0.425803	0.0394561	3.99719e-27	0.248792	0.602813
4,7,8,12	0.265429	0.03942	1.67344e-11	0.0885806	0.442278
4,7,8,13	-0.0672724	0.0394303	0.0879933	-0.244168	0.109623
4,7,8,14	-0.0358876	0.0394058	0.362446	-0.212673	0.140897
4,7,8,15	0.123612	0.0394185	0.00171423	-0.0532301	0.300454
4,7,8,16	0.344275	0.0394408	2.63989e-18	0.167332	0.521217
4,7,9,10	-0.0548405	0.0394577	0.164579	-0.231859	0.122178
4,7,9,11	0.130163	0.039434	0.000964711	-0.0467482	0.307075
4,7,9,12	-0.0166077	0.0394098	0.673458	-0.193411	0.160196
4,7,9,13	-0.0983404	0.039424	0.0126188	-0.275207	0.0785265
4,7,9,14	0.0383335	0.0393995	0.330585	-0.138423	0.21509
4,7,9,15	0.058206	0.0394131	0.13973	-0.118612	0.235024
4,7,9,16	-0.077316	0.0394344	0.0499279	-0.25423	0.0995975
4,7,10,11	1.21279	0.0394728	1.28818e-205	1.0357	1.38987
4,7,10,12	0.0445691	0.0394629	0.258737	-0.132472	0.221611
4,7,10,13	0.0318692	0.0394686	0.419407	-0.145198	0.208936
4,7,10,14	0.0408865	0.0394436	0.299935	-0.136068	0.217841
4,7,10,15	-0.0608306	0.0394562	0.123146	-0.237842	0.116181
4,7,10,16	0.208514	0.0394889	1.29421e-07	0.0313566	0.385672
4,7,11,12	0.0743541	0.0394364	0.0593784	-0.102568	0.251277
4,7,11,13	-0.0386802	0.0394424	0.326756	-0.21563	0.138269
4,7,11,14	-0.0213119	0.0394198	0.588758	-0.19816	0.155536
4,7,11,15	-0.165007	0.0394347	2.86462e-05	-0.341922	0.0119078
4,7,11,16	0.496649	0.039458	2.79052e-36	0.31963	0.673669
4,7,12,13	-0.0455951	0.0394188	0.247406	-0.222438	0.131248
4,7,12,14	-0.000856766	0.039398	0.98265	-0.177607	0.175893
4,7,12,15	0.204192	0.039417	2.22296e-07	0.027356	0.381027
4,7,12,16	-0.00783534	0.0394366	0.842512	-0.184758	0.169088
4,7,13,14	-0.0144482	0.0394173	0.713961	-0.191285	0.162388
4,7,13,15	-0.162743	0.0394135	3.64683e-05	-0.339562	0.0140769
4,7,13,16	-0.0169694	0.0394388	0.667	-0.193902	0.159964
4,7,14,15	0.0907933	0.0393967	0.0211929	-0.0859508	0.267537
4,7,14,16	0.0947794	0.0394135	0.0161869	-0.0820402	0.271599
4,7,15,16	-0.296276	0.039432	5.83573e-14	-0.473179	-0.119374
4,8,9,10	0.0250367	0.0394723	0.525897	-0.152047	0.20212
4,8,9,11	-0.0419168	0.0394169	0.287595	-0.218752	0.134918
4,8,9,12	-0.118843	0.0394002	0.00255986	-0.295603	0.0579169
4,8,9,13	-0.0282142	0.0394118	0.474067	-0.205026	0.148598
4,8,9,14	-0.0491533	0.039388	0.212063	-0.225859	0.127552
4,8,9,15	-0.0365387	0.0393958	0.353682	-0.213279	0.140201
4,8,9,16	-0.0755217	0.0394145	0.0553587	-0.252346	0.101302
4,8,10,11	0.271873	0.0394715	5.72349e-12	0.0947931	0.448953
4,8,10,12	-0.0471684	0.0394714	0.232091	-0.224248	0.129911
4,8,10,13	0.113872	0.039475	0.00391973	-0.0632234	0.290968
4,8,10,14	-0.0372372	0.0394447	0.345155	-0.214197	0.139723
4,8,10,15	-0.0426086	0.0394548	0.280177	-0.219614	0.134397
4,8,10,16	-0.00547168	0.0394866	0.88979	-0.182619	0.171676
4,8,11,12	-0.145008	0.0394122	0.000234122	-0.321822	0.0318059
4,8,11,13	-0.0562285	0.0394203	0.153762	-0.233079	0.120622
4,8,11,14	-0.0451075	0.039397	0.252235	-0.221853	0.131638
4,8,11,15	-0.14523	0.0394059	0.000228474	-0.322016	0.0315555
4,8,11,16	0.0135114	0.0394186	0.731774	-0.163331	0.190354
4,8,12,13	0.0201701	0.0394046	0.608743	-0.15661	0.19695
4,8,12,14	0.0141437	0.039379	0.71947	-0.162521	0.190808
4,8,12,15	0.0572084	0.03939	0.146408	-0.119506	0.233923
4,8,12,16	-0.152732	0.039408	0.000106454	-0.329527	0.0240629
4,8,13,14	0.0197824	0.0394	0.615605	-0.156977	0.196542
4,8,13,15	-0.0945692	0.0393917	0.0163652	-0.271291	0.0821528
4,8,13,16	0.03853	0.0394117	0.328262	-0.138282	0.215342
4,8,14,15	0.0305101	0.0393721	0.438393	-0.146124	0.207144
4,8,14,16	0.00768455	0.0393852	0.845305	-0.169008	0.184377
4,8,15,16	-0.159702	0.0394002	5.05602e-05	-0.336463	0.017058
4,9,10,11	0.167047	0.0394483	2.29323e-05	-0.00992823	0.344023
4,9,10,12	-0.0463694	0.0394414	0.239739	-0.223314	0.130576
4,9,10,13	0.0506369	0.0394555	0.19936	-0.126371	0.227645
4,9,10,14	0.0351457	0.0394308	0.372758	-0.141752	0.212043
4,9,10,15	0.0548229	0.0394375	0.164498	-0.122105	0.23175
4,9,10,16	-0.0593195	0.0394646	0.132818	-0.236369	0.11773
4,9,11,12	-0.142124	0.0394082	0.000310665	-0.31892	0.0346717
4,9,11,13	0.0254964	0.039423	0.517804	-0.151366	0.202359
4,9,11,14	-0.0430276	0.0394034	0.274848	-0.219802	0.133747
4,9,11,15	-0.110601	0.0394094	0.00501071	-0.287402	0.0662006
4,9,11,16	-0.0376316	0.0394256	0.339836	-0.214506	0.139242
4,9,12,13	-0.0435804	0.0394064	0.268765	-0.220368	0.133207
4,9,12,14	0.0143498	0.039385	0.715599	-0.162342	0.191041
4,9,12,15	0.0106726	0.0393955	0.786463	-0.166066	0.187412
4,9,12,16	-0.0439202	0.0394095	0.265087	-0.220722	0.132882
4,9,13,14	0.0301452	0.0394129	0.44436	-0.146672	0.206962
4,9,13,15	-0.0746069	0.0394021	0.0582997	-0.251376	0.102162
4,9,13,16	-0.00264783	0.0394237	0.946452	-0.179513	0.174217
4,9,14,15	-0.0187054	0.0393849	0.634832	-0.195397	0.157986
4,9,14,16	-0.00396724	0.0394006	0.919797	-0.180729	0.172795
4,9,15,16	-0.0739145	0.0394113	0.0607338	-0.250724	0.102895
4,10,11,12	0.19538	0.0394458	7.32392e-07	0.0184154	0.372345
4,10,11,13	-0.0356551	0.0394598	0.366222	-0.212682	0.141372
4,10,11,14	0.0306755	0.0394322	0.436614	-0.146228	0.207579
4,10,11,15	0.155749	0.0394395	7.85533e-05	-0.0211874	0.332685
4,10,11,16	0.383669	0.0394661	2.54174e-22	0.206613	0.560725
4,10,12,13	0.0103131	0.0394516	0.793776	-0.166678	0.187304
4,10,12,14	0.0195337	0.0394241	0.620266	-0.157333	0.196401
4,10,12,15	0.112515	0.0394362	0.00433132	-0.0644068	0.289436
4,10,12,16	-0.0521331	0.0394668	0.186528	-0.229192	0.124926
4,10,13,14	0.0155496	0.0394467	0.693441	-0.161419	0.192518
[truncated: 4,888 more rows]

## Sheet: SI06
Params:	4944
Performance:	0.965916
Term	Coefficient	Standard Error	p-value	95% CI lower	95% CI upper
Intercept	6.0706
1	-0.159197	0.0801011	0.046883	-0.512889	0.194496
2	-0.0440055	0.0803525	0.583933	-0.398808	0.310797
3	1.4352	0.0810235	8.21376e-70	1.07744	1.79297
4	0.258004	0.0800727	0.00127396	-0.0955631	0.611571
5	-0.310319	0.0805181	0.000116458	-0.665853	0.0452146
6	-0.0705008	0.0804513	0.380866	-0.425739	0.284738
7	-0.0671338	0.0802391	0.402784	-0.421436	0.287168
8	0.0822285	0.0810713	0.310461	-0.275748	0.440205
9	-0.10517	0.0803557	0.190613	-0.459987	0.249647
10	-0.227437	0.0811199	0.0050553	-0.585629	0.130754
11	-0.084539	0.080194	0.291809	-0.438642	0.269564
12	-0.0995772	0.0801768	0.214258	-0.453604	0.25445
13	-0.0331387	0.0803697	0.680102	-0.388017	0.32174
14	-0.0383723	0.0808653	0.635133	-0.395439	0.318695
15	-0.148234	0.0802514	0.0647413	-0.50259	0.206123
1,2	0.203584	0.0819128	0.0129476	-0.158108	0.565276
1,3	0.118251	0.0818567	0.14858	-0.243194	0.479695
1,4	0.133379	0.0812996	0.100895	-0.225606	0.492363
1,5	0.0867758	0.081962	0.289731	-0.275134	0.448685
1,6	0.0228607	0.0816983	0.779619	-0.337884	0.383606
1,7	0.0547483	0.0814795	0.501636	-0.305031	0.414527
1,8	0.201379	0.0820022	0.0140643	-0.160708	0.563466
1,9	0.154599	0.0814945	0.0578326	-0.205246	0.514444
1,10	0.130259	0.0820649	0.112464	-0.232105	0.492623
1,11	0.181169	0.0816502	0.0265059	-0.179364	0.541701
1,12	0.0993206	0.0814931	0.222946	-0.260518	0.45916
1,13	0.0540007	0.0815903	0.508072	-0.306268	0.414269
1,14	0.0256138	0.0818448	0.754317	-0.335778	0.387006
1,15	0.098386	0.0817023	0.228522	-0.262377	0.459149
2,3	0.178819	0.0821882	0.0295842	-0.184089	0.541728
2,4	-0.00881306	0.0815495	0.913941	-0.368901	0.351275
2,5	-0.168595	0.0823693	0.0406858	-0.532303	0.195113
2,6	0.0388605	0.0821719	0.636276	-0.323976	0.401697
2,7	0.00420289	0.0817976	0.959022	-0.356981	0.365387
2,8	0.596833	0.0825931	5.09921e-13	0.232137	0.96153
2,9	0.199187	0.0818583	0.014968	-0.162265	0.560638
2,10	0.223035	0.0823349	0.00675549	-0.140521	0.586591
2,11	0.0757609	0.0820556	0.355865	-0.286562	0.438083
2,12	0.0195089	0.0819669	0.811875	-0.342422	0.38144
2,13	0.0431238	0.0820115	0.599013	-0.319004	0.405252
2,14	-0.0383564	0.08215	0.64057	-0.401096	0.324383
2,15	0.136466	0.0819848	0.0960186	-0.225544	0.498476
3,4	-2.2556	0.0819989	2.63604e-164	-2.61767	-1.89352
3,5	-0.239628	0.0829808	0.00388321	-0.606036	0.126781
3,6	0.0188123	0.0821692	0.818913	-0.344012	0.381637
3,7	-0.263866	0.0819107	0.00127724	-0.625549	0.0978169
3,8	0.228575	0.0823895	0.00553553	-0.135222	0.592372
3,9	-0.0865798	0.0820817	0.291526	-0.449018	0.275858
3,10	0.579274	0.0825729	2.34867e-12	0.214667	0.943881
3,11	0.175316	0.0819376	0.0323939	-0.186486	0.537117
3,12	0.210433	0.0818738	0.010169	-0.151087	0.571953
3,13	0.0769156	0.0821894	0.349367	-0.285998	0.439829
3,14	-0.315383	0.0830414	0.000146243	-0.682059	0.0512921
3,15	0.222844	0.0819133	0.00652278	-0.13885	0.584539
4,5	1.24219	0.0816262	4.41875e-52	0.881764	1.60262
4,6	-0.0304745	0.0815499	0.708637	-0.390564	0.329615
4,7	-0.244001	0.0814151	0.00272903	-0.603495	0.115494
4,8	-0.43425	0.0819278	1.16458e-07	-0.796008	-0.0724915
4,9	-0.133587	0.0814113	0.100833	-0.493064	0.225891
4,10	0.0165843	0.0818464	0.839428	-0.344815	0.377983
4,11	-0.246215	0.0813943	0.00248897	-0.605617	0.113188
4,12	0.0915459	0.0813137	0.260245	-0.267501	0.450593
4,13	-0.0460704	0.081503	0.571902	-0.405953	0.313812
4,14	-0.110596	0.0816832	0.175761	-0.471274	0.250083
4,15	-0.0129125	0.0813917	0.873949	-0.372304	0.346479
5,6	0.193984	0.0822777	0.018397	-0.16932	0.557287
5,7	0.513553	0.0820435	3.91984e-10	0.151283	0.875822
5,8	0.242839	0.082697	0.00332227	-0.122316	0.607994
5,9	0.378725	0.0820445	3.92826e-06	0.0164516	0.740999
5,10	0.327209	0.0830435	8.16124e-05	-0.0394753	0.693894
5,11	0.291604	0.0821589	0.000386957	-0.0711747	0.654383
5,12	0.145626	0.081971	0.0756522	-0.216323	0.507576
5,13	0.0747273	0.0821295	0.362898	-0.287922	0.437376
5,14	0.118227	0.0825884	0.152291	-0.246448	0.482903
5,15	0.121701	0.0819823	0.137694	-0.240298	0.4837
6,7	0.0879674	0.0817165	0.281715	-0.272858	0.448793
6,8	0.0782263	0.0826402	0.343857	-0.286678	0.443131
6,9	0.0879062	0.0818269	0.2827	-0.273406	0.449219
6,10	0.0830276	0.0823814	0.313538	-0.280734	0.446789
6,11	0.0700317	0.0818877	0.392439	-0.29155	0.431613
6,12	0.0202963	0.0817089	0.803829	-0.340496	0.381088
6,13	0.054532	0.0818872	0.505455	-0.307047	0.416111
6,14	0.00316166	0.08203	0.969255	-0.359048	0.365371
6,15	0.0412244	0.081807	0.61432	-0.320001	0.40245
7,8	0.398085	0.0820153	1.218e-06	0.0359403	0.760229
7,9	0.16184	0.0815699	0.0472593	-0.198339	0.522018
7,10	0.438959	0.0823307	9.80983e-08	0.0754222	0.802497
7,11	0.225213	0.0816902	0.00583893	-0.135497	0.585922
7,12	-0.0199009	0.0815668	0.807246	-0.380065	0.340263
7,13	0.00025029	0.0816975	0.997556	-0.360491	0.360992
7,14	0.00698496	0.0818374	0.931982	-0.354374	0.368344
7,15	0.146639	0.0816837	0.0726329	-0.214042	0.507319
8,9	-0.105575	0.082008	0.197974	-0.467688	0.256537
8,10	1.37698	0.082951	1.40998e-61	1.01071	1.74326
8,11	0.0536174	0.0820198	0.513302	-0.308547	0.415782
8,12	0.209331	0.0822991	0.010979	-0.154067	0.572729
8,13	0.295034	0.0824997	0.000349251	-0.0692492	0.659318
8,14	-0.0176812	0.082435	0.83017	-0.381679	0.346317
8,15	0.407351	0.0820914	7.0134e-07	0.0448707	0.769832
9,10	0.870131	0.0823821	5.01824e-26	0.506367	1.2339
9,11	0.0226144	0.0817275	0.782009	-0.338259	0.383488
9,12	0.0397689	0.0816305	0.626133	-0.320677	0.400215
9,13	0.0510369	0.0816694	0.532029	-0.309581	0.411654
9,14	-0.0534214	0.0820279	0.514885	-0.415622	0.308779
9,15	0.222362	0.0817703	0.0065453	-0.138701	0.583425
10,11	0.141615	0.082176	0.0848431	-0.221239	0.50447
10,12	0.0829608	0.0820364	0.311897	-0.279277	0.445199
10,13	-0.00517981	0.0822311	0.949774	-0.368278	0.357918
10,14	-0.0257709	0.0824347	0.75457	-0.389767	0.338226
10,15	0.328678	0.0822891	6.50887e-05	-0.0346757	0.692032
11,12	0.0942	0.0815509	0.248057	-0.265894	0.454294
11,13	-0.00737837	0.0816191	0.92797	-0.367774	0.353017
11,14	0.173653	0.0821891	0.0346235	-0.18926	0.536565
11,15	0.163219	0.0817837	0.0459718	-0.197903	0.524341
12,13	-0.00339511	0.0815724	0.966801	-0.363584	0.356794
12,14	0.0301718	0.0819221	0.712653	-0.331561	0.391905
12,15	0.0515933	0.0815915	0.527172	-0.30868	0.411867
13,14	0.0324423	0.0820432	0.692529	-0.329826	0.39471
13,15	-0.00201319	0.0817164	0.980345	-0.362838	0.358812
14,15	0.0997465	0.0820572	0.224158	-0.262583	0.462076
1,2,3	0.041406	0.0752226	0.582018	-0.290745	0.373557
1,2,4	-0.534836	0.0748964	9.49911e-13	-0.865547	-0.204125
1,2,5	0.32724	0.0754776	1.45896e-05	-0.00603711	0.660517
1,2,6	0.0420877	0.0752604	0.576011	-0.29023	0.374406
1,2,7	-0.0351704	0.0750669	0.639416	-0.366634	0.296293
1,2,8	0.217828	0.0753486	0.003844	-0.114879	0.550535
1,2,9	-0.12109	0.07502	0.106516	-0.452346	0.210166
1,2,10	0.482995	0.0754037	1.5239e-10	0.150044	0.815946
1,2,11	0.25702	0.0752359	0.000635981	-0.0751899	0.589229
1,2,12	-0.0263087	0.0751089	0.726136	-0.357958	0.30534
1,2,13	-0.0383797	0.075091	0.609278	-0.36995	0.29319
1,2,14	-0.0084893	0.075255	0.910184	-0.340783	0.323805
1,2,15	0.261208	0.0752672	0.000520488	-0.0711404	0.593555
1,3,4	-0.0335995	0.0750402	0.654335	-0.364945	0.297746
1,3,5	0.293971	0.0754636	9.82203e-05	-0.0392445	0.627186
1,3,6	0.0646391	0.075074	0.389243	-0.266856	0.396134
1,3,7	0.0333195	0.0749014	0.656435	-0.297413	0.364052
1,3,8	-0.0794953	0.0751537	0.29017	-0.411342	0.252351
1,3,9	-0.0263605	0.0749402	0.725025	-0.357264	0.304543
1,3,10	-0.156173	0.0752921	0.0380672	-0.488631	0.176285
1,3,11	-0.148621	0.0750239	0.0476034	-0.479895	0.182653
1,3,12	-0.023441	0.074913	0.754352	-0.354225	0.307343
1,3,13	-0.0158867	0.0749642	0.832169	-0.346897	0.315124
1,3,14	0.0309448	0.075227	0.680818	-0.301226	0.363115
1,3,15	-0.0712943	0.0750348	0.342045	-0.402616	0.260028
1,4,5	0.24321	0.0748568	0.00115951	-0.0873257	0.573746
1,4,6	-0.0405006	0.0747667	0.588034	-0.370639	0.289637
1,4,7	-0.00465398	0.0746828	0.950311	-0.334421	0.325114
1,4,8	-0.184259	0.0749634	0.0139778	-0.515266	0.146747
1,4,9	-0.0837534	0.0746498	0.261893	-0.413375	0.245869
1,4,10	-0.333461	0.0749823	8.73484e-06	-0.664551	-0.00237045
1,4,11	-0.0696696	0.0747639	0.351416	-0.399795	0.260456
1,4,12	-0.0782457	0.0746271	0.294422	-0.407767	0.251276
1,4,13	-0.0807811	0.0746678	0.279318	-0.410483	0.24892
1,4,14	0.0106455	0.0748035	0.886834	-0.319655	0.340946
1,4,15	-0.154335	0.0747558	0.0389777	-0.484425	0.175755
1,5,6	-0.0207578	0.0753195	0.78286	-0.353337	0.311821
1,5,7	-0.106064	0.0751341	0.158061	-0.437824	0.225696
1,5,8	0.126101	0.0755249	0.0949981	-0.207385	0.459587
1,5,9	-0.255217	0.0750784	0.000676464	-0.586731	0.0762973
1,5,10	0.56725	0.0756002	6.41537e-14	0.233432	0.901068
1,5,11	-0.0956051	0.0753126	0.204294	-0.428153	0.236943
1,5,12	-0.0600138	0.0751333	0.424434	-0.39177	0.271743
1,5,13	0.0412337	0.0752202	0.583578	-0.290907	0.373374
1,5,14	0.0613115	0.0754027	0.416157	-0.271635	0.394258
1,5,15	-0.126787	0.0752698	0.0921104	-0.459146	0.205573
1,6,7	0.0232414	0.0748844	0.756286	-0.307416	0.353899
1,6,8	-0.100367	0.0753154	0.182667	-0.432928	0.232194
1,6,9	-0.0931816	0.074911	0.213548	-0.423957	0.237593
1,6,10	0.0892772	0.0752329	0.235365	-0.242919	0.421474
1,6,11	-0.0319431	0.0750859	0.670533	-0.36349	0.299604
1,6,12	-0.0103252	0.074947	0.890426	-0.341259	0.320609
1,6,13	0.0205329	0.0749462	0.784111	-0.310398	0.351463
1,6,14	0.0514565	0.0750888	0.493177	-0.280104	0.383017
1,6,15	-0.0404265	0.075068	0.590214	-0.371895	0.291042
1,7,8	-0.00100074	0.0750141	0.989356	-0.332231	0.33023
1,7,9	-0.0658307	0.074722	0.378321	-0.395771	0.26411
1,7,10	-0.0463568	0.075144	0.537301	-0.378161	0.285447
1,7,11	-0.0742388	0.0749136	0.321698	-0.405025	0.256548
1,7,12	0.0143335	0.0748089	0.848056	-0.315991	0.344658
1,7,13	-0.0135527	0.0748053	0.856234	-0.343861	0.316756
1,7,14	-0.0939702	0.0749754	0.21009	-0.42503	0.237089
1,7,15	-0.0315895	0.0748991	0.673203	-0.362312	0.299133
1,8,9	-0.0347619	0.0749797	0.642926	-0.36584	0.296317
1,8,10	-0.390871	0.0753233	2.12682e-07	-0.723467	-0.058275
1,8,11	-0.15165	0.075156	0.043621	-0.483507	0.180207
1,8,12	-0.150277	0.0750865	0.0453605	-0.481827	0.181273
1,8,13	0.0610353	0.0751654	0.416791	-0.270863	0.392934
1,8,14	0.0783099	0.0752311	0.29792	-0.253879	0.410498
1,8,15	-0.165646	0.0751492	0.0275171	-0.497472	0.166181
1,9,10	-0.0151115	0.0751029	0.840535	-0.346734	0.316511
1,9,11	-0.0134379	0.07492	0.857654	-0.344253	0.317377
1,9,12	0.0190591	0.0748007	0.79888	-0.311229	0.349347
1,9,13	-0.0916804	0.0748021	0.220345	-0.421975	0.238614
1,9,14	-0.0457909	0.0749526	0.541251	-0.37675	0.285168
1,9,15	-0.110963	0.0749031	0.138507	-0.441703	0.219777
1,10,11	-0.0325757	0.0752164	0.664951	-0.364699	0.299548
1,10,12	0.0630554	0.0751439	0.401405	-0.268748	0.394859
1,10,13	0.0786439	0.0751257	0.295187	-0.253079	0.410367
1,10,14	-0.0210946	0.0752865	0.779333	-0.353528	0.311338
1,10,15	-0.0343605	0.0752435	0.647921	-0.366604	0.297883
1,11,12	-0.219635	0.0748914	0.00336304	-0.550323	0.111054
1,11,13	0.0205852	0.0749245	0.783514	-0.310249	0.35142
1,11,14	-0.181084	0.075177	0.0160134	-0.513033	0.150866
1,11,15	0.0482733	0.0750943	0.520336	-0.283311	0.379858
1,12,13	-0.0847479	0.0747918	0.257175	-0.414997	0.245501
1,12,14	-0.0097375	0.0749874	0.896682	-0.34085	0.321375
1,12,15	-0.0170768	0.0749173	0.819693	-0.34788	0.313726
1,13,14	-0.065289	0.0749746	0.383863	-0.396345	0.265767
1,13,15	-0.0245411	0.074954	0.743356	-0.355506	0.306424
1,14,15	0.149385	0.0751391	0.0468096	-0.182398	0.481167
2,3,4	0.118242	0.0753078	0.116399	-0.214285	0.45077
2,3,5	-0.0558592	0.0758766	0.461624	-0.390898	0.279179
2,3,6	0.0239066	0.0753887	0.751162	-0.308978	0.356791
2,3,7	0.15164	0.075198	0.0437529	-0.180402	0.483683
2,3,8	-0.366346	0.0754379	1.20293e-06	-0.699448	-0.0332443
2,3,9	-0.0798275	0.0752002	0.288457	-0.41188	0.252225
2,3,10	-0.533884	0.0755528	1.62909e-12	-0.867493	-0.200275
2,3,11	-0.00358737	0.0752991	0.962002	-0.336076	0.328901
2,3,12	-0.170299	0.0752216	0.0235842	-0.502446	0.161848
2,3,13	-0.109197	0.0752602	0.146811	-0.441514	0.22312
2,3,14	0.0471825	0.0754407	0.531697	-0.285931	0.380297
2,3,15	-0.139222	0.075318	0.0645469	-0.471795	0.19335
2,4,5	0.733562	0.0750951	1.67622e-22	0.401973	1.06515
2,4,6	-0.122188	0.0749879	0.103231	-0.453303	0.208926
2,4,7	0.0647396	0.0748985	0.387396	-0.26598	0.39546
2,4,8	-0.612344	0.0751688	3.91486e-16	-0.944257	-0.28043
2,4,9	-0.207157	0.0748503	0.00565069	-0.537664	0.12335
2,4,10	-0.440163	0.0751539	4.77271e-09	-0.772011	-0.108315
2,4,11	-0.0508495	0.074968	0.497598	-0.381877	0.280178
2,4,12	-0.0816751	0.0748565	0.275244	-0.41221	0.248859
2,4,13	-0.109265	0.0748598	0.144412	-0.439814	0.221284
2,4,14	0.0235791	0.0749698	0.753133	-0.307456	0.354614
2,4,15	-0.219366	0.0749615	0.00343221	-0.550364	0.111633
2,5,6	0.0444255	0.0756119	0.556842	-0.289444	0.378295
2,5,7	0.188631	0.0754443	0.012416	-0.144499	0.521761
2,5,8	-0.157716	0.0757724	0.0374029	-0.492295	0.176863
2,5,9	-0.163651	0.0753523	0.0298789	-0.496374	0.169073
2,5,10	0.0534813	0.0758864	0.480969	-0.281601	0.388563
2,5,11	-0.121799	0.0755713	0.107038	-0.455489	0.211892
2,5,12	0.0166592	0.075458	0.82527	-0.316531	0.34985
2,5,13	-0.0507741	0.0754933	0.50123	-0.38412	0.282572
2,5,14	0.0298854	0.0757014	0.693008	-0.30438	0.36415
2,5,15	-0.109444	0.0755725	0.147573	-0.44314	0.224252
2,6,7	-0.0678396	0.0751724	0.366824	-0.399769	0.26409
2,6,8	-0.0126884	0.0754987	0.866537	-0.346058	0.320682
2,6,9	-0.127957	0.0751351	0.0885755	-0.459722	0.203808
2,6,10	0.0287134	0.0754584	0.703562	-0.304479	0.361906
2,6,11	0.174219	0.0753455	0.0207703	-0.158475	0.506913
2,6,12	-0.0313986	0.0752071	0.67632	-0.363481	0.300684
2,6,13	0.0493208	0.0752039	0.511941	-0.282748	0.381389
2,6,14	0.00643344	0.0752776	0.931894	-0.325961	0.338827
2,6,15	0.00377869	0.0753064	0.959981	-0.328742	0.3363
2,7,8	-0.0873315	0.0752574	0.245881	-0.419636	0.244973
2,7,9	-0.0744815	0.0749685	0.320473	-0.405511	0.256548
2,7,10	0.101079	0.0753708	0.179902	-0.231726	0.433885
2,7,11	-0.0796929	0.0751705	0.289081	-0.411614	0.252228
2,7,12	-0.0128969	0.0750712	0.863599	-0.344379	0.318585
2,7,13	0.0238713	0.0750677	0.75049	-0.307596	0.355339
2,7,14	0.0615055	0.0752402	0.413676	-0.270723	0.393734
2,7,15	-0.154978	0.0751633	0.0392278	-0.486868	0.176911
2,8,9	-0.0762962	0.0752016	0.310326	-0.408354	0.255762
2,8,10	-0.67773	0.0755501	3.13547e-19	-1.01133	-0.344133
2,8,11	-0.112011	0.075344	0.137114	-0.444698	0.220676
2,8,12	0.03798	0.0753365	0.614168	-0.294674	0.370634
2,8,13	-0.0355397	0.0753923	0.637361	-0.36844	0.297361
2,8,14	0.0334968	0.0754518	0.657083	-0.299667	0.36666
2,8,15	-0.206153	0.0753698	0.00623801	-0.538953	0.126648
2,9,10	0.292691	0.0752905	0.000101528	-0.0397598	0.625142
2,9,11	0.00178505	0.0751374	0.981046	-0.32999	0.33356
2,9,12	0.0832086	0.0750474	0.267549	-0.248169	0.414586
2,9,13	-0.0970479	0.0750435	0.195946	-0.428408	0.234312
2,9,14	-0.0481551	0.0751668	0.52176	-0.38006	0.28375
2,9,15	0.00234033	0.075152	0.975157	-0.329499	0.334179
2,10,11	0.00502842	0.0753973	0.946827	-0.327894	0.337951
2,10,12	0.100642	0.075381	0.181849	-0.232208	0.433493
2,10,13	0.0546234	0.0753566	0.468541	-0.278119	0.387366
2,10,14	0.0920377	0.0754785	0.222707	-0.241243	0.425319
2,10,15	0.0444056	0.0754477	0.55616	-0.288739	0.377551
2,11,12	0.00262338	0.0751562	0.972155	-0.329235	0.334481
2,11,13	0.0715502	0.0751421	0.341005	-0.260246	0.403346
2,11,14	-0.0767991	0.0754032	0.308444	-0.409748	0.25615
2,11,15	0.139141	0.0753295	0.0647438	-0.193482	0.471764
2,12,13	0.0505752	0.0750839	0.500582	-0.280963	0.382114
2,12,14	0.00972747	0.0752279	0.897116	-0.322447	0.341902
2,12,15	0.00574947	0.0751947	0.939053	-0.326279	0.337778
2,13,14	0.0146161	0.0752221	0.845937	-0.317533	0.346765
2,13,15	0.00291041	0.0751866	0.969123	-0.329082	0.334903
2,14,15	0.195297	0.0753409	0.00954222	-0.137377	0.527971
3,4,5	1.85155	0.0753287	5.90517e-132	1.51893	2.18417
3,4,6	0.203687	0.0752279	0.00678136	-0.128487	0.535862
3,4,7	1.13079	0.0750699	4.56445e-51	0.799315	1.46227
3,4,8	1.81298	0.0752884	8.73153e-127	1.48054	2.14542
3,4,9	0.633914	0.0750646	3.19363e-17	0.30246	0.965367
3,4,10	0.0109039	0.0754407	0.885078	-0.32221	0.344018
3,4,11	0.455173	0.0751412	1.4002e-09	0.123381	0.786965
3,4,12	-0.269142	0.0750345	0.000335211	-0.600462	0.0621785
3,4,13	0.0924159	0.075096	0.21847	-0.239176	0.424008
3,4,14	0.568038	0.0753257	4.80717e-14	0.235432	0.900644
3,4,15	0.329679	0.0750941	1.13669e-05	-0.00190448	0.661263
3,5,6	0.144331	0.0756354	0.0563703	-0.189643	0.478305
3,5,7	-0.0464389	0.0754618	0.538298	-0.379646	0.286768
3,5,8	0.0475938	0.0757103	0.529596	-0.286711	0.381899
3,5,9	-0.0363985	0.0754453	0.629491	-0.369533	0.296736
3,5,10	-0.611852	0.0759781	8.40859e-16	-0.947339	-0.276365
3,5,11	0.0546744	0.0755397	0.469205	-0.278877	0.388226
3,5,12	0.0925274	0.0754339	0.219983	-0.240557	0.425612
3,5,13	-0.111597	0.0755689	0.139752	-0.445277	0.222083
3,5,14	-0.0254462	0.0758715	0.737337	-0.360463	0.30957
3,5,15	0.192944	0.0755269	0.0106352	-0.140551	0.526439
3,6,7	0.000128437	0.075054	0.998635	-0.331278	0.331535
3,6,8	-0.0261575	0.0753835	0.7286	-0.359019	0.306704
3,6,9	-0.0641582	0.0750807	0.392823	-0.395683	0.267366
3,6,10	-0.000668413	0.0753909	0.992926	-0.333563	0.332226
3,6,11	-0.0859718	0.0751678	0.252745	-0.417881	0.245938
3,6,12	0.0738667	0.0750595	0.325071	-0.257564	0.405298
3,6,13	-0.0369205	0.0751141	0.623059	-0.368593	0.294751
3,6,14	-0.0547735	0.075317	0.467085	-0.387341	0.277794
3,6,15	-0.0652277	0.0751013	0.385112	-0.396843	0.266388
3,7,8	-0.0239311	0.075097	0.74998	-0.355528	0.307666
3,7,9	0.153233	0.0749112	0.0408125	-0.177543	0.484009
3,7,10	0.113443	0.0753295	0.13209	-0.21918	0.446066
3,7,11	-0.2021	0.0750202	0.00706574	-0.533357	0.129158
3,7,12	-0.064733	0.0749212	0.387588	-0.395553	0.266087
3,7,13	-0.0319202	0.0749836	0.670332	-0.363016	0.299175
3,7,14	0.0653061	0.0752327	0.385372	-0.26689	0.397502
3,7,15	0.00279086	0.0749818	0.970309	-0.328297	0.333879
3,8,9	0.21092	0.0750935	0.00497675	-0.120661	0.542501
3,8,10	-1.55156	0.0754858	3.64894e-93	-1.88487	-1.21824
3,8,11	-0.108186	0.0751561	0.150026	-0.440043	0.223672
3,8,12	-0.316435	0.0751594	2.55984e-05	-0.648307	0.0154368
3,8,13	-0.182378	0.0752739	0.0154057	-0.514755	0.15
3,8,14	0.247287	0.0754254	0.00104468	-0.0857594	0.580333
3,8,15	-0.262339	0.075168	0.000483725	-0.594249	0.0695709
3,9,10	-0.28252	0.0752948	0.000175667	-0.61499	0.0499498
3,9,11	0.0762396	0.0750102	0.309453	-0.254974	0.407453
3,9,12	-0.0787516	0.0749344	0.293295	-0.40963	0.252127
3,9,13	0.00176437	0.0749959	0.981231	-0.329386	0.332914
3,9,14	0.0874865	0.0752174	0.244793	-0.244642	0.419615
3,9,15	-0.051427	0.0750103	0.492971	-0.382641	0.279787
3,10,11	-0.239755	0.0753398	0.00146266	-0.572424	0.0929133
3,10,12	-0.182325	0.0752797	0.0154435	-0.514728	0.150079
3,10,13	-0.100689	0.0752972	0.181161	-0.43317	0.231791
3,10,14	0.419334	0.0755346	2.85814e-08	0.0858051	0.752862
3,10,15	-0.320475	0.0753524	2.1162e-05	-0.653199	0.0122492
3,11,12	-0.144973	0.0749642	0.0531359	-0.475984	0.186037
3,11,13	0.126344	0.0750075	0.0921116	-0.204857	0.457545
3,11,14	-0.0410563	0.0753581	0.585884	-0.373806	0.291693
3,11,15	-0.0581484	0.0751115	0.438842	-0.389809	0.273512
3,12,13	0.0318138	0.0749534	0.671243	-0.299149	0.362776
3,12,14	0.0774538	0.0752129	0.303116	-0.254655	0.409562
3,12,15	-0.0351611	0.0749712	0.639077	-0.366202	0.29588
3,13,14	-0.0066318	0.0752523	0.929776	-0.338914	0.32565
3,13,15	-0.0547136	0.0750488	0.465983	-0.386097	0.27667
3,14,15	0.251513	0.0752845	0.000836407	-0.0809114	0.583937
4,5,6	-0.060896	0.0749675	0.416628	-0.391921	0.270129
4,5,7	-0.3162	0.0748955	2.43068e-05	-0.646906	0.0145071
4,5,8	0.712524	0.0751757	2.79443e-21	0.38058	1.04447
4,5,9	-0.0815186	0.0748307	0.275999	-0.411939	0.248902
4,5,10	0.864908	0.075247	1.66044e-30	0.53265	1.19717
4,5,11	0.160589	0.0749627	0.032182	-0.170414	0.491593
4,5,12	0.0326977	0.0748017	0.662024	-0.297595	0.36299
4,5,13	0.0281086	0.0748813	0.707384	-0.302535	0.358753
4,5,14	-0.300929	0.0750871	6.147e-05	-0.632482	0.0306241
4,5,15	0.264772	0.0748959	0.000408151	-0.0659366	0.59548
4,6,7	0.00876555	0.0747897	0.9067	-0.321474	0.339005
4,6,8	-0.0235138	0.075138	0.754327	-0.355291	0.308264
4,6,9	-0.0423754	0.0747585	0.570834	-0.372477	0.287726
4,6,10	-0.115783	0.0750519	0.122915	-0.44718	0.215615
4,6,11	-0.0264223	0.0748815	0.7242	-0.357067	0.304223
4,6,12	0.0357949	0.074728	0.631941	-0.294172	0.365762
4,6,13	-0.0270738	0.0747609	0.717252	-0.357186	0.303039
4,6,14	0.08648	0.0748777	0.248121	-0.244148	0.417108
4,6,15	0.0331591	0.0748003	0.657551	-0.297127	0.363445
4,7,8	-0.194843	0.0749654	0.00935194	-0.525858	0.136173
4,7,9	0.0560982	0.0746617	0.45244	-0.273576	0.385773
4,7,10	-0.134044	0.0750945	0.0742711	-0.46563	0.197541
4,7,11	0.0676843	0.0747909	0.365484	-0.262561	0.397929
4,7,12	0.00923086	0.0746839	0.901634	-0.320541	0.339003
4,7,13	-0.0241849	0.0747241	0.746201	-0.354135	0.305765
4,7,14	0.222504	0.0748558	0.00295711	-0.108028	0.553035
4,7,15	-0.0541504	0.074763	0.468892	-0.384272	0.275971
4,8,9	0.172194	0.0748496	0.0214254	-0.15831	0.502698
4,8,10	-1.33496	0.0752772	5.72665e-70	-1.66735	-1.00257
4,8,11	0.175251	0.0749561	0.019392	-0.155723	0.506225
4,8,12	-0.143977	0.0749342	0.0546946	-0.474854	0.186901
4,8,13	-0.0835355	0.0750188	0.265492	-0.414786	0.247715
4,8,14	0.0848893	0.0750761	0.258188	-0.246615	0.416394
4,8,15	-0.270892	0.0749815	0.00030348	-0.601978	0.0601947
4,9,10	-0.784609	0.0749773	1.40586e-25	-1.11568	-0.453541
4,9,11	0.161489	0.0747317	0.0307109	-0.168495	0.491472
4,9,12	-0.0745748	0.0746414	0.317751	-0.404159	0.25501
4,9,13	0.00978616	0.0746543	0.895708	-0.319856	0.339428
4,9,14	0.218865	0.0747788	0.00342717	-0.111326	0.549057
4,9,15	-0.066672	0.0747235	0.372268	-0.396619	0.263275
4,10,11	0.0509878	0.0750528	0.496916	-0.280413	0.382389
4,10,12	-0.107186	0.0749528	0.152715	-0.438146	0.223774
4,10,13	0.00367396	0.0749561	0.960908	-0.327301	0.334648
4,10,14	0.0635359	0.0750956	0.397523	-0.268055	0.395126
4,10,15	-0.354308	0.0750427	2.35385e-06	-0.685664	-0.022951
4,11,12	0.037983	0.0746997	0.611123	-0.291859	0.367825
4,11,13	0.105205	0.0747082	0.15908	-0.224675	0.435085
4,11,14	0.0916099	0.0749655	0.221708	-0.239406	0.422626
4,11,15	0.138815	0.0748494	0.063666	-0.191688	0.469318
4,12,13	0.0568129	0.0746162	0.446424	-0.27266	0.386286
4,12,14	-0.0104802	0.0747757	0.888539	-0.340658	0.319698
4,12,15	-0.117991	0.0746886	0.114172	-0.447784	0.211803
4,13,14	0.0248327	0.0748004	0.739902	-0.305454	0.35512
4,13,15	0.116179	0.0747218	0.12	-0.213761	0.446119
4,14,15	-0.427566	0.0748847	1.14397e-08	-0.758225	-0.0969063
5,6,7	-0.0794028	0.0752475	0.291333	-0.411664	0.252858
5,6,8	-0.013339	0.0756736	0.860083	-0.347482	0.320804
5,6,9	-0.228389	0.0752053	0.0023927	-0.560464	0.103685
5,6,10	0.123504	0.0756619	0.102626	-0.210587	0.457594
5,6,11	-0.0669264	0.0754133	0.374839	-0.39992	0.266067
5,6,12	-0.12679	0.0752577	0.0920506	-0.459096	0.205517
5,6,13	-0.0423207	0.0753118	0.574161	-0.374865	0.290224
5,6,14	-0.0896531	0.0754803	0.234935	-0.422942	0.243636
5,6,15	-0.148534	0.075327	0.0486356	-0.481147	0.184078
5,7,8	-0.109703	0.0754034	0.145713	-0.442653	0.223246
5,7,9	-0.459924	0.075073	9.11551e-10	-0.791414	-0.128434
5,7,10	0.318696	0.0756005	2.50008e-05	-0.0151239	0.652516
5,7,11	-0.173754	0.0753154	0.021061	-0.506315	0.158806
5,7,12	-0.0368544	0.0751556	0.623873	-0.36871	0.295001
5,7,13	-0.0386175	0.075188	0.607528	-0.370616	0.293381
5,7,14	-0.401416	0.0754611	1.04877e-07	-0.73462	-0.0682117
5,7,15	-0.182288	0.0752299	0.0153964	-0.514471	0.149896
5,8,9	-0.175192	0.0753388	0.0200586	-0.507856	0.157472
5,8,10	0.234791	0.0757709	0.00194577	-0.0997814	0.569363
5,8,11	-0.164151	0.0755549	0.029819	-0.497769	0.169468
5,8,12	-0.0755805	0.0754372	0.316401	-0.408679	0.257518
5,8,13	-0.0648744	0.0755876	0.390753	-0.398637	0.268889
5,8,14	0.0549029	0.0757054	0.468325	-0.27938	0.389186
5,8,15	-0.197246	0.0754875	0.00898109	-0.530567	0.136075
5,9,10	0.560922	0.0755128	1.13364e-13	0.22749	0.894355
5,9,11	-0.235027	0.0752232	0.00178358	-0.567181	0.0971265
5,9,12	-0.0832525	0.0750755	0.267476	-0.414754	0.248249
5,9,13	-0.0329645	0.0751251	0.660814	-0.364685	0.298756
5,9,14	-0.211904	0.0753722	0.00493568	-0.544716	0.120908
5,9,15	-0.265131	0.0751969	0.000422871	-0.597168	0.0669067
5,10,11	-0.00671523	0.0756871	0.929302	-0.340917	0.327487
5,10,12	-0.0817042	0.0755668	0.279609	-0.415375	0.251967
5,10,13	0.106943	0.0755773	0.157074	-0.226774	0.440661
5,10,14	0.175473	0.0757964	0.0206169	-0.159211	0.510158
5,10,15	0.221931	0.0756359	0.00334688	-0.112045	0.555907
5,11,12	-0.124739	0.0752326	0.0973186	-0.456935	0.207456
5,11,13	0.0391205	0.0752607	0.603207	-0.293199	0.37144
5,11,14	-0.263926	0.0756599	0.000486835	-0.598008	0.0701559
5,11,15	-0.0702019	0.075426	0.351997	-0.403251	0.262847
5,12,13	0.00571397	0.0751661	0.939405	-0.326188	0.337616
5,12,14	0.0821174	0.0754158	0.276225	-0.250887	0.415122
5,12,15	-0.000922204	0.0752223	0.990218	-0.333072	0.331228
5,13,14	-0.0474935	0.0754538	0.529067	-0.380666	0.285679
5,13,15	-0.149723	0.07528	0.0467242	-0.482128	0.182681
5,14,15	0.464491	0.0755246	7.84768e-10	0.131006	0.797975
6,7,8	0.130138	0.0751789	0.0834555	-0.20182	0.462096
6,7,9	-0.0595149	0.0748512	0.426557	-0.390026	0.270996
6,7,10	-0.129915	0.0752122	0.0841229	-0.46202	0.20219
6,7,11	-0.036148	0.0750419	0.63002	-0.367501	0.295205
6,7,12	-0.0087204	0.0749153	0.907334	-0.339515	0.322074
6,7,13	-0.100279	0.0749022	0.180647	-0.431015	0.230457
6,7,14	-0.103295	0.0750486	0.168715	-0.434678	0.228087
6,7,15	-0.135017	0.0749652	0.0717048	-0.466031	0.195998
6,8,9	-0.0424561	0.0751463	0.572093	-0.37427	0.289358
6,8,10	-0.114761	0.0754509	0.128272	-0.44792	0.218399
6,8,11	-0.032245	0.0753047	0.668513	-0.364758	0.300268
6,8,12	-0.044021	0.0752436	0.558521	-0.376265	0.288223
6,8,13	-0.0372188	0.0753136	0.62118	-0.369771	0.295334
6,8,14	0.079111	0.0753628	0.293849	-0.253659	0.411881
6,8,15	0.0423147	0.0752525	0.573914	-0.289968	0.374598
6,9,10	0.191389	0.0751731	0.0109029	-0.140544	0.523321
6,9,11	-0.0291788	0.0750002	0.697243	-0.360348	0.30199
6,9,12	0.0697585	0.0748839	0.351574	-0.260897	0.400414
6,9,13	-0.0145834	0.0749033	0.845632	-0.345325	0.316158
6,9,14	0.0518303	0.0750339	0.489724	-0.279488	0.383148
6,9,15	-0.0104526	0.0749802	0.889131	-0.341534	0.320628
6,10,11	0.148676	0.0752678	0.0482447	-0.183674	0.481027
6,10,12	-0.0700371	0.0752219	0.351824	-0.402185	0.262111
6,10,13	0.105495	0.0751975	0.160656	-0.226545	0.437535
6,10,14	-0.141133	0.0753071	0.0609271	-0.473658	0.191391
6,10,15	-0.0414485	0.0752581	0.581809	-0.373756	0.290859
6,11,12	-0.0709343	0.0749943	0.344227	-0.402078	0.260209
6,11,13	-0.0363328	0.0750052	0.628104	-0.367524	0.294859
6,11,14	-0.0379043	0.0752493	0.614465	-0.370173	0.294365
6,11,15	0.0196017	0.075162	0.794254	-0.312282	0.351485
6,12,13	0.00605868	0.0749168	0.935544	-0.324742	0.336859
6,12,14	-0.0207066	0.0750549	0.782638	-0.352117	0.310704
6,12,15	-0.0102068	0.0749716	0.89171	-0.341249	0.320836
6,13,14	-0.0339571	0.0750418	0.650906	-0.36531	0.297396
6,13,15	-0.036531	0.0750195	0.626295	-0.367785	0.294723
6,14,15	0.19582	0.0751435	0.00916718	-0.135982	0.527622
7,8,9	0.423036	0.0749008	1.64003e-08	0.092306	0.753766
7,8,10	-0.406866	0.075337	6.69761e-08	-0.739522	-0.0742094
7,8,11	0.11973	0.0750705	0.110747	-0.21175	0.451209
7,8,12	-0.0733633	0.0750561	0.328357	-0.404779	0.258052
7,8,13	-0.044285	0.0750938	0.555377	-0.375867	0.287297
7,8,14	-0.351501	0.0752009	2.96574e-06	-0.683556	-0.0194463
7,8,15	0.0461546	0.075054	0.538591	-0.285252	0.377561
7,9,10	-0.180832	0.0751391	0.0161068	-0.512615	0.15095
7,9,11	-0.192842	0.0748746	0.010014	-0.523456	0.137773
7,9,12	-0.0644988	0.0747758	0.388385	-0.394677	0.265679
7,9,13	-0.0645091	0.0747615	0.38822	-0.394624	0.265606
7,9,14	-0.0633862	0.0749707	0.39785	-0.394425	0.267653
7,9,15	-0.264269	0.0748548	0.000415588	-0.594796	0.066258
7,10,11	-0.211014	0.0752635	0.00505612	-0.543346	0.121318
7,10,12	-0.119064	0.075198	0.113355	-0.451107	0.212978
7,10,13	-0.0349931	0.0751866	0.641637	-0.366985	0.296999
7,10,14	0.020629	0.07536	0.784287	-0.312129	0.353387
7,10,15	-0.186413	0.0752628	0.0132618	-0.518741	0.145916
7,11,12	0.0226395	0.0749483	0.762602	-0.3083	0.353579
7,11,13	0.0261186	0.0748937	0.727285	-0.30458	0.356818
7,11,14	-0.251096	0.0752008	0.000841931	-0.583151	0.080959
7,11,15	-0.270844	0.075047	0.000307941	-0.60222	0.0605314
7,12,13	0.0848837	0.0748162	0.256569	-0.245473	0.41524
7,12,14	0.0575224	0.0750171	0.443212	-0.273721	0.388766
7,12,15	0.0946385	0.0749033	0.206429	-0.236103	0.42538
7,13,14	0.0719475	0.0750263	0.337586	-0.259337	0.403232
7,13,15	0.0909797	0.0749158	0.224595	-0.239816	0.421776
7,14,15	0.0661812	0.0751031	0.378215	-0.265442	0.397805
8,9,10	-0.540926	0.0752466	6.7105e-13	-0.873183	-0.208669
8,9,11	0.175029	0.0750336	0.0196722	-0.156287	0.506346
8,9,12	-0.12424	0.0750109	0.0976752	-0.455456	0.206977
8,9,13	-0.0809455	0.0750506	0.2808	-0.412337	0.250446
8,9,14	-0.00443634	0.0751301	0.952914	-0.336179	0.327306
8,9,15	-0.142099	0.0750193	0.0582147	-0.473352	0.189155
8,10,11	-0.143415	0.0753164	0.0568995	-0.47598	0.189151
8,10,12	-0.282884	0.075317	0.000173072	-0.615452	0.0496836
8,10,13	-0.154157	0.0753615	0.0408084	-0.486922	0.178607
8,10,14	-0.102125	0.0754406	0.175839	-0.435239	0.230989
8,10,15	-0.586798	0.0753609	7.13507e-15	-0.919559	-0.254036
8,11,12	-0.0110088	0.0750924	0.883446	-0.342585	0.320567
8,11,13	-0.15816	0.0751243	0.0352739	-0.489877	0.173557
8,11,14	-0.0800357	0.0753231	0.287989	-0.41263	0.252559
8,11,15	-0.275571	0.0751883	0.000247736	-0.60757	0.0564285
8,12,13	-0.147268	0.0751311	0.0499888	-0.479015	0.184479
8,12,14	0.0636556	0.0752325	0.397494	-0.268539	0.39585
8,12,15	0.0742296	0.0750906	0.3229	-0.257338	0.405798
8,13,14	-0.210231	0.0752678	0.00522424	-0.542581	0.12212
8,13,15	-0.221475	0.0751686	0.00321795	-0.553388	0.110438
8,14,15	0.439445	0.0752377	5.256e-09	0.107227	0.771662
9,10,11	-0.336027	0.0752008	7.91271e-06	-0.668082	-0.00397243
9,10,12	-0.0246619	0.075122	0.742694	-0.356369	0.307045
9,10,13	0.00509358	0.0751175	0.945939	-0.326593	0.33678
9,10,14	-0.179585	0.0752677	0.0170422	-0.511935	0.152766
9,10,15	-0.111944	0.0751923	0.13656	-0.443961	0.220073
9,11,12	-0.0214164	0.0748798	0.774873	-0.352054	0.309221
9,11,13	-0.011525	0.0748656	0.877656	-0.3421	0.31905
9,11,14	-0.00824295	0.0751419	0.912649	-0.340038	0.323552
9,11,15	0.0477788	0.0750339	0.524285	-0.283539	0.379097
9,12,13	-0.0527063	0.0747922	0.481001	-0.382957	0.277544
9,12,14	0.0573219	0.0749626	0.444472	-0.273681	0.388325
9,12,15	-0.0288445	0.0748932	0.700136	-0.359541	0.301852
9,13,14	0.0555912	0.0749721	0.458402	-0.275454	0.386636
9,13,15	-0.0272344	0.0749097	0.716187	-0.358004	0.303535
9,14,15	-0.0159953	0.075086	0.831308	-0.347543	0.315553
10,11,12	-0.147387	0.0751766	0.0499427	-0.479335	0.184561
10,11,13	0.0183523	0.075159	0.807093	-0.313518	0.350222
10,11,14	-0.208477	0.075436	0.0057201	-0.54157	0.124616
10,11,15	-0.0575742	0.0753202	0.44464	-0.390156	0.275008
10,12,13	0.000616273	0.0751099	0.993454	-0.331037	0.33227
10,12,14	0.0752035	0.0752866	0.317854	-0.25723	0.407637
10,12,15	0.0530567	0.0751789	0.480356	-0.278901	0.385015
10,13,14	0.085684	0.0752869	0.255089	-0.246751	0.418119
10,13,15	-0.0980023	0.0752209	0.192634	-0.430146	0.234141
10,14,15	0.476993	0.075331	2.45879e-10	0.144363	0.809623
11,12,13	0.0236294	0.074827	0.752166	-0.306775	0.354034
11,12,14	-0.0805717	0.0751502	0.283666	-0.412403	0.25126
11,12,15	-0.10943	0.0750139	0.144633	-0.440659	0.2218
11,13,14	-0.144621	0.0751084	0.0541771	-0.476268	0.187026
11,13,15	-0.0575859	0.0750207	0.442732	-0.388845	0.273674
11,14,15	-0.00553947	0.0753514	0.941397	-0.338259	0.32718
12,13,14	-0.00301152	0.0749704	0.967958	-0.334049	0.328026
12,13,15	0.0426095	0.0749235	0.56956	-0.288221	0.37344
12,14,15	0.0624221	0.0750946	0.405842	-0.269164	0.394008
13,14,15	-0.00859068	0.0750984	0.908928	-0.340193	0.323012
1,2,3,4	0.673842	0.0586379	1.71251e-30	0.414922	0.932762
1,2,3,5	-0.158844	0.0587658	0.00687593	-0.418329	0.100641
1,2,3,6	-0.0407998	0.058651	0.486662	-0.299778	0.218178
1,2,3,7	0.0952398	0.0585788	0.103995	-0.163419	0.353899
1,2,3,8	-0.332792	0.0586311	1.39259e-08	-0.591682	-0.0739025
1,2,3,9	0.0339276	0.0585527	0.562299	-0.224616	0.292471
1,2,3,10	-0.40197	0.0587098	7.71759e-12	-0.661208	-0.142733
1,2,3,11	-0.0974243	0.0586369	0.096628	-0.35634	0.161491
1,2,3,12	0.0944703	0.0586263	0.107105	-0.164399	0.353339
1,2,3,13	0.0046546	0.0585991	0.93669	-0.254094	0.263404
1,2,3,14	-0.00571447	0.058654	0.922388	-0.264706	0.253277
1,2,3,15	-0.105087	0.0586531	0.0731974	-0.364074	0.1539
1,2,4,5	-0.0246171	0.0585851	0.674347	-0.283304	0.23407
1,2,4,6	0.111498	0.0585693	0.0569604	-0.147119	0.370115
1,2,4,7	0.291667	0.0585081	6.23247e-07	0.0333197	0.550014
1,2,4,8	0.186168	0.0585806	0.00148474	-0.0724993	0.444835
1,2,4,9	0.208371	0.0584752	0.000366696	-0.0498304	0.466573
1,2,4,10	-0.0559917	0.0586488	0.339741	-0.31496	0.202977
1,2,4,11	0.0533127	0.0585671	0.362681	-0.205295	0.31192
1,2,4,12	0.0634365	0.0585362	0.278501	-0.195035	0.321908
1,2,4,13	0.0715318	0.0585082	0.221493	-0.186815	0.329879
1,2,4,14	0.0411904	0.0585726	0.481914	-0.217441	0.299822
1,2,4,15	0.019344	0.0585727	0.741209	-0.239288	0.277976
1,2,5,6	-0.180205	0.0587509	0.00216232	-0.439624	0.0792137
1,2,5,7	-0.312805	0.0587144	1.00339e-07	-0.572063	-0.0535466
1,2,5,8	-0.142252	0.0587427	0.0154585	-0.401635	0.117131
1,2,5,9	-0.0174521	0.0586546	0.766056	-0.276446	0.241542
1,2,5,10	-0.259288	0.0587828	1.03315e-05	-0.518848	0.000271758
1,2,5,11	-0.212639	0.058766	0.000296961	-0.472125	0.0468463
1,2,5,12	-0.0207727	0.0587265	0.723552	-0.280084	0.238538
1,2,5,13	0.00430717	0.0587144	0.941522	-0.254951	0.263565
1,2,5,14	-0.0793552	0.0587717	0.176954	-0.338866	0.180156
1,2,5,15	-0.108886	0.0587686	0.0639234	-0.368383	0.150611
1,2,6,7	-0.0271808	0.0585907	0.642716	-0.285892	0.231531
1,2,6,8	0.0632247	0.0586381	0.280946	-0.195696	0.322146
1,2,6,9	0.0540274	0.058561	0.356232	-0.204553	0.312608
1,2,6,10	-0.0709742	0.0586894	0.226551	-0.330122	0.188173
1,2,6,11	-0.0700232	0.0586735	0.232708	-0.329101	0.189054
1,2,6,12	0.0082667	0.0586399	0.887892	-0.250662	0.267196
1,2,6,13	0.0170297	0.0586145	0.771407	-0.241787	0.275846
1,2,6,14	-0.0393326	0.0586669	0.502584	-0.298381	0.219716
1,2,6,15	0.0139894	0.0586637	0.811521	-0.245044	0.273023
1,2,7,8	-0.0475488	0.0585694	0.416892	-0.306167	0.211069
1,2,7,9	0.0651987	0.0585055	0.265117	-0.193137	0.323534
1,2,7,10	-0.153062	0.0586292	0.00904141	-0.411944	0.10582
1,2,7,11	-0.0518614	0.0586138	0.376273	-0.310675	0.206952
1,2,7,12	-0.00398012	0.0585692	0.945821	-0.262597	0.254636
1,2,7,13	0.0455749	0.0585424	0.436285	-0.212923	0.304073
1,2,7,14	0.112808	0.0586252	0.0543363	-0.146056	0.371672
1,2,7,15	-0.0873493	0.0585963	0.136053	-0.346086	0.171387
1,2,8,9	0.145998	0.0585388	0.0126356	-0.112484	0.404481
1,2,8,10	-0.293658	0.0586832	5.6466e-07	-0.552778	-0.0345385
1,2,8,11	-0.212382	0.0586252	0.000292073	-0.471245	0.0464822
1,2,8,12	-0.0381511	0.0585934	0.514978	-0.296875	0.220573
1,2,8,13	0.00935287	0.0585905	0.873173	-0.249358	0.268064
1,2,8,14	-0.0542299	0.0586395	0.355078	-0.313157	0.204697
1,2,8,15	-0.181217	0.0586217	0.00199487	-0.440066	0.0776315
1,2,9,10	-0.304828	0.0585955	1.98335e-07	-0.563561	-0.0460952
1,2,9,11	-0.0473586	0.0585744	0.418798	-0.305998	0.211281
1,2,9,12	-0.0531536	0.058531	0.363818	-0.311602	0.205294
1,2,9,13	0.0400328	0.0585103	0.493854	-0.218324	0.29839
1,2,9,14	0.112183	0.0585893	0.0555361	-0.146522	0.370889
1,2,9,15	0.0573079	0.0585731	0.327885	-0.201326	0.315942
1,2,10,11	-0.189019	0.0586821	0.00127865	-0.448134	0.0700961
1,2,10,12	0.00771883	0.0586704	0.895331	-0.251345	0.266782
1,2,10,13	-0.00780713	0.0586383	0.894083	-0.266729	0.251115
1,2,10,14	-0.00682533	0.0586929	0.907425	-0.265988	0.252338
1,2,10,15	-0.20047	0.0586909	0.00063714	-0.459624	0.0586841
1,2,11,12	0.0687507	0.0586273	0.240937	-0.190123	0.327624
1,2,11,13	0.0100385	0.0586137	0.864017	-0.248775	0.268852
1,2,11,14	-0.102819	0.0586951	0.0798291	-0.361992	0.156354
1,2,11,15	-0.150768	0.0586754	0.0101891	-0.409853	0.108318
1,2,12,13	-0.000982907	0.05859	0.986615	-0.259691	0.257726
1,2,12,14	-0.0115886	0.0586337	0.843325	-0.27049	0.247313
1,2,12,15	0.0204588	0.0586398	0.727174	-0.238469	0.279387
1,2,13,14	0.00346407	0.0586117	0.952871	-0.25534	0.262268
1,2,13,15	-0.116242	0.0586161	0.0473654	-0.375066	0.142582
1,2,14,15	-0.0878853	0.0586784	0.134211	-0.346984	0.171214
1,3,4,5	-0.662642	0.0585737	1.32023e-29	-0.921279	-0.404005
1,3,4,6	-0.0201164	0.0585696	0.731254	-0.278735	0.238502
1,3,4,7	-0.117694	0.0584977	0.0442357	-0.375995	0.140607
1,3,4,8	0.180474	0.058581	0.00206681	-0.0781949	0.439143
1,3,4,9	-0.0441425	0.0584734	0.450307	-0.302336	0.214051
1,3,4,10	0.386867	0.0586779	4.38784e-11	0.127771	0.645964
1,3,4,11	0.171038	0.0585404	0.00348407	-0.0874516	0.429527
1,3,4,12	0.0625127	0.0585338	0.285541	-0.195948	0.320973
1,3,4,13	0.0425824	0.0585103	0.466757	-0.215774	0.300939
1,3,4,14	0.0229967	0.0585773	0.694628	-0.235656	0.281649
1,3,4,15	0.119236	0.0585555	0.041731	-0.13932	0.377792
1,3,5,6	-0.110217	0.0586782	0.060348	-0.369315	0.148882
1,3,5,7	-0.0751113	0.0586273	0.200146	-0.333985	0.183762
1,3,5,8	-0.301504	0.0586728	2.78524e-07	-0.560578	-0.0424296
1,3,5,9	0.0472017	0.0585804	0.420389	-0.211465	0.305868
1,3,5,10	-0.421852	0.0587422	7.07826e-13	-0.681233	-0.162471
1,3,5,11	-0.0355974	0.0586755	0.544067	-0.294683	0.223489
1,3,5,12	-0.00832649	0.0586474	0.8871	-0.267289	0.250636
1,3,5,13	0.049245	0.0586423	0.401055	-0.209695	0.308185
1,3,5,14	0.0129209	0.0586967	0.825772	-0.246259	0.2721
1,3,5,15	0.0104704	0.0586888	0.858406	-0.248674	0.269615
1,3,6,7	-0.0654935	0.0585112	0.263008	-0.323854	0.192867
1,3,6,8	-0.0157316	0.0585711	0.788247	-0.274357	0.242893
1,3,6,9	0.0511972	0.0584836	0.381358	-0.207042	0.309436
1,3,6,10	-0.0317555	0.0586407	0.588149	-0.290688	0.227177
1,3,6,11	0.0194263	0.0585743	0.740155	-0.239213	0.278065
1,3,6,12	-0.0917072	0.0585633	0.117372	-0.350298	0.166883
1,3,6,13	-0.0765105	0.0585397	0.191229	-0.334997	0.181976
1,3,6,14	0.0378861	0.0585865	0.517852	-0.220807	0.296579
1,3,6,15	-0.0313568	0.0585756	0.592432	-0.290002	0.227288
1,3,7,8	-0.0698115	0.0584867	0.232633	-0.328064	0.188441
1,3,7,9	-0.00311718	0.0584173	0.957445	-0.261063	0.254829
1,3,7,10	0.0203109	0.0585767	0.728789	-0.238339	0.278961
1,3,7,11	0.0632867	0.0585096	0.279419	-0.195067	0.32164
1,3,7,12	0.0341458	0.0584803	0.559303	-0.224078	0.29237
1,3,7,13	0.0205991	0.0584567	0.724554	-0.237521	0.278719
1,3,7,14	-0.065442	0.0585379	0.263601	-0.32392	0.193036
1,3,7,15	0.00861607	0.0585015	0.882912	-0.249702	0.266934
1,3,8,9	-0.0231922	0.0584637	0.691597	-0.281343	0.234959
1,3,8,10	0.328597	0.0586342	2.11288e-08	0.0696927	0.587501
1,3,8,11	0.0949522	0.0585341	0.104779	-0.163509	0.353414
1,3,8,12	0.0474916	0.0585273	0.417117	-0.21094	0.305923
1,3,8,13	-0.0660882	0.0585233	0.258797	-0.324502	0.192326
1,3,8,14	-0.0727565	0.0585722	0.214185	-0.331386	0.185873
1,3,8,15	0.0426697	0.058534	0.466024	-0.215791	0.301131
1,3,9,10	0.0070142	0.0585422	0.904631	-0.251483	0.265512
1,3,9,11	-0.00497972	0.05847	0.932129	-0.263158	0.253199
1,3,9,12	0.011823	0.0584411	0.839679	-0.246228	0.269874
1,3,9,13	0.0265025	0.0584298	0.650136	-0.231499	0.284504
1,3,9,14	-0.103482	0.0584937	0.0768875	-0.361765	0.154802
1,3,9,15	-0.015876	0.0584749	0.786007	-0.274076	0.242324
1,3,10,11	0.0555588	0.058621	0.343259	-0.203287	0.314404
1,3,10,12	-0.0771781	0.0586145	0.187948	-0.335995	0.181639
1,3,10,13	0.0265203	0.0585881	0.650799	-0.23218	0.28522
1,3,10,14	-0.0352855	0.0586472	0.547407	-0.294247	0.223676
1,3,10,15	0.0584284	0.0586179	0.318887	-0.200403	0.31726
1,3,11,12	-0.00774874	0.0585276	0.894673	-0.266182	0.250684
1,3,11,13	-0.0391328	0.058519	0.50368	-0.297528	0.219262
1,3,11,14	0.0768449	0.058591	0.189684	-0.181868	0.335558
1,3,11,15	-0.0235485	0.0585695	0.687642	-0.282167	0.235069
1,3,12,13	0.011709	0.0585106	0.84139	-0.246649	0.270067
1,3,12,14	-0.0204521	0.05855	0.726859	-0.278984	0.23808
1,3,12,15	-0.0188225	0.0585545	0.747869	-0.277374	0.239729
1,3,13,14	0.0566426	0.0585326	0.333198	-0.201812	0.315098
1,3,13,15	0.0158833	0.058531	0.786112	-0.242565	0.274331
1,3,14,15	-0.0462158	0.0585913	0.430247	-0.30493	0.212499
1,4,5,6	0.0506194	0.0584967	0.386861	-0.207677	0.308916
1,4,5,7	0.00171799	0.0584588	0.976555	-0.256411	0.259847
1,4,5,8	-0.262231	0.0585246	7.47039e-06	-0.520651	-0.00381142
1,4,5,9	0.162878	0.0584057	0.00529504	-0.0950164	0.420773
1,4,5,10	-0.395596	0.0585695	1.46438e-11	-0.654214	-0.136978
1,4,5,11	-0.0689792	0.0585055	0.2384	-0.327315	0.189356
1,4,5,12	0.0690628	0.058459	0.237458	-0.189067	0.327193
1,4,5,13	-0.0180773	0.0584584	0.757146	-0.276205	0.24005
1,4,5,14	0.00410837	0.0585154	0.944027	-0.254271	0.262488
1,4,5,15	0.0348335	0.0585083	0.551608	-0.223514	0.293181
1,4,6,7	-0.0413785	0.058444	0.47895	-0.299443	0.216686
1,4,6,8	0.0345834	0.0585218	0.554559	-0.223824	0.292991
1,4,6,9	0.104479	0.0584089	0.0736667	-0.15343	0.362387
1,4,6,10	0.0168932	0.0585724	0.773031	-0.241738	0.275524
1,4,6,11	0.0184518	0.0585061	0.752474	-0.239887	0.27679
1,4,6,12	-0.0731514	0.0584758	0.210957	-0.331356	0.185053
1,4,6,13	-0.023466	0.0584511	0.688082	-0.281561	0.234629
1,4,6,14	-0.0496487	0.0585073	0.396118	-0.307992	0.208695
1,4,6,15	0.0427393	0.0584999	0.465037	-0.215571	0.30105
1,4,7,8	0.113315	0.0584541	0.0525699	-0.144794	0.371423
1,4,7,9	-0.0522778	0.0583543	0.370331	-0.309946	0.20539
1,4,7,10	0.160584	0.0585205	0.00607251	-0.0978181	0.418985
1,4,7,11	-0.0507021	0.0584496	0.385704	-0.308791	0.207387
1,4,7,12	0.0109685	0.0584071	0.85104	-0.246932	0.268869
1,4,7,13	0.0341301	0.0583845	0.558839	-0.223671	0.291931
1,4,7,14	-0.00733183	0.0584743	0.900219	-0.26553	0.250866
1,4,7,15	0.0431275	0.0584382	0.46052	-0.214911	0.301166
1,4,8,9	0.00270119	0.0584212	0.963122	-0.255262	0.260664
1,4,8,10	0.603294	0.0586023	8.27458e-25	0.344531	0.862057
1,4,8,11	0.0576258	0.0584939	0.324555	-0.200659	0.31591
1,4,8,12	0.0756946	0.0584718	0.195487	-0.182492	0.333881
1,4,8,13	-0.0606138	0.0584654	0.299863	-0.318772	0.197544
1,4,8,14	-0.0487557	0.0585223	0.404788	-0.307165	0.209654
1,4,8,15	0.130713	0.0584864	0.0254305	-0.127539	0.388964
1,4,9,10	0.127479	0.058475	0.0292613	-0.130722	0.38568
1,4,9,11	0.00315032	0.0584055	0.956984	-0.254743	0.261044
1,4,9,12	0.0188467	0.0583633	0.746758	-0.238861	0.276554
1,4,9,13	0.0688437	0.05835	0.238074	-0.188805	0.326492
1,4,9,14	-0.0870428	0.0584235	0.136273	-0.345016	0.170931
1,4,9,15	0.0276221	0.0584041	0.636254	-0.230266	0.28551
1,4,10,11	0.0736362	0.0585597	0.2086	-0.184939	0.332211
1,4,10,12	-0.0456634	0.0585393	0.435371	-0.304148	0.212821
1,4,10,13	0.105198	0.0585136	0.0722142	-0.153173	0.363569
1,4,10,14	0.0462047	0.0585771	0.430245	-0.212447	0.304857
1,4,10,15	0.0835339	0.0585558	0.153716	-0.175024	0.342091
1,4,11,12	0.0505651	0.0584509	0.386999	-0.207529	0.30866
1,4,11,13	-0.0372711	0.0584428	0.523651	-0.29533	0.220788
1,4,11,14	0.0519496	0.0585252	0.37474	-0.206473	0.310372
1,4,11,15	-0.0879673	0.0585008	0.132672	-0.346282	0.170347
1,4,12,13	0.0204412	0.0584205	0.726418	-0.237519	0.278402
1,4,12,14	-0.0481887	0.0584639	0.409807	-0.30634	0.209963
1,4,12,15	0.0645872	0.0584674	0.269312	-0.19358	0.322754
1,4,13,14	0.0659257	0.0584481	0.259357	-0.192156	0.324008
1,4,13,15	0.0112739	0.0584482	0.847048	-0.246809	0.269357
1,4,14,15	0.0957897	0.0585159	0.101645	-0.162592	0.354171
1,5,6,7	0.0471809	0.0586173	0.420886	-0.211648	0.30601
1,5,6,8	0.0172084	0.0586571	0.76924	-0.241797	0.276213
1,5,6,9	0.0214582	0.0585687	0.714087	-0.237156	0.280073
1,5,6,10	0.0164713	0.0586837	0.778959	-0.242651	0.275594
1,5,6,11	0.0445652	0.0586796	0.447581	-0.214539	0.30367
1,5,6,12	0.0413671	0.0586423	0.480558	-0.217572	0.300306
1,5,6,13	0.0271327	0.0586397	0.643582	-0.231795	0.286061
1,5,6,14	-0.0949729	0.0586802	0.10557	-0.35408	0.164134
1,5,6,15	0.0903342	0.0586829	0.123728	-0.168785	0.349453
1,5,7,8	0.0317499	0.0586053	0.58799	-0.227026	0.290526
1,5,7,9	0.199735	0.0585388	0.000645806	-0.0587476	0.458217
1,5,7,10	-0.202453	0.0586511	0.000557659	-0.461432	0.056525
1,5,7,11	0.142255	0.0586473	0.0152893	-0.116706	0.401217
1,5,7,12	0.0348583	0.0585917	0.551891	-0.223858	0.293574
1,5,7,13	-0.0227542	0.058588	0.697741	-0.281454	0.235946
1,5,7,14	0.0837547	0.0586702	0.153433	-0.175308	0.342817
1,5,7,15	0.128143	0.0586376	0.0288721	-0.130775	0.387062
1,5,8,9	0.0814064	0.0585583	0.164487	-0.177162	0.339975
1,5,8,10	-0.397995	0.058698	1.22323e-11	-0.65718	-0.13881
1,5,8,11	0.0790166	0.0586445	0.177868	-0.179933	0.337966
1,5,8,12	0.00957883	0.0586115	0.870182	-0.249225	0.268382
1,5,8,13	-0.0405941	0.0586221	0.488648	-0.299444	0.218256
1,5,8,14	-0.0363917	0.0586683	0.535068	-0.295446	0.222662
1,5,8,15	0.0814259	0.0586512	0.165055	-0.177553	0.340405
1,5,9,10	-0.222928	0.0585999	0.000142552	-0.48168	0.035824
1,5,9,11	0.000167264	0.0585853	0.997722	-0.258521	0.258855
1,5,9,12	-0.00908946	0.0585314	0.876592	-0.267539	0.24936
1,5,9,13	0.0764401	0.0585357	0.191608	-0.182029	0.334909
1,5,9,14	0.106402	0.0586004	0.0694238	-0.152352	0.365157
1,5,9,15	0.189887	0.0585834	0.0011913	-0.0687931	0.448566
1,5,10,11	0.00117605	0.0586944	0.984014	-0.257994	0.260346
1,5,10,12	-0.0266762	0.0586645	0.64931	-0.285714	0.232361
1,5,10,13	-0.162278	0.0586511	0.00566411	-0.421256	0.0967002
1,5,10,14	-0.160186	0.0587039	0.00636227	-0.419398	0.0990253
1,5,10,15	-0.0362997	0.0586981	0.536308	-0.295485	0.222886
1,5,11,12	0.0658723	0.0586402	0.261307	-0.193058	0.324803
1,5,11,13	-0.0529865	0.058644	0.366254	-0.311934	0.205961
1,5,11,14	0.0650533	0.0587241	0.267967	-0.194247	0.324354
1,5,11,15	0.0543066	0.0587023	0.354913	-0.204898	0.313511
1,5,12,13	0.00173171	0.0586138	0.976431	-0.257082	0.260546
1,5,12,14	-0.0271099	0.0586514	0.643926	-0.28609	0.23187
1,5,12,15	-0.0422886	0.0586509	0.470902	-0.301266	0.216689
1,5,13,14	-0.0579825	0.0586493	0.322853	-0.316953	0.200988
1,5,13,15	0.00758458	0.0586581	0.89712	-0.251425	0.266594
1,5,14,15	-0.225935	0.0587082	0.000119148	-0.485165	0.0332958
1,6,7,8	-0.0387799	0.0585068	0.507446	-0.297121	0.219561
1,6,7,9	-0.00949966	0.0584367	0.870864	-0.267531	0.248532
1,6,7,10	-0.0411881	0.0585532	0.481794	-0.299734	0.217358
1,6,7,11	0.00995216	0.0585504	0.86503	-0.248582	0.268486
1,6,7,12	-0.0703032	0.0585027	0.229487	-0.328626	0.18802
1,6,7,13	0.0700036	0.058482	0.231313	-0.188228	0.328235
1,6,7,14	0.0163161	0.0585595	0.780535	-0.242258	0.27489
1,6,7,15	0.113571	0.0585272	0.0523313	-0.14486	0.372003
1,6,8,9	0.0841077	0.0584668	0.150288	-0.174057	0.342272
1,6,8,10	-0.0520854	0.0586105	0.374188	-0.310884	0.206714
1,6,8,11	0.0490584	0.0585634	0.402208	-0.209533	0.30765
1,6,8,12	0.120708	0.0585412	0.0392242	-0.137785	0.379201
1,6,8,13	-0.0205893	0.0585325	0.725022	-0.279044	0.237865
1,6,8,14	-0.000452973	0.058572	0.99383	-0.259082	0.258176
1,6,8,15	0.010584	0.0585524	0.856557	-0.247959	0.269126
1,6,9,10	-0.0484886	0.0585167	0.407322	-0.306874	0.209896
1,6,9,11	0.0220941	0.0585017	0.705682	-0.236225	0.280413
1,6,9,12	0.00702665	0.0584618	0.904332	-0.251116	0.265169
1,6,9,13	-0.0475735	0.0584523	0.415718	-0.305674	0.210527
1,6,9,14	0.00877607	0.0585116	0.880775	-0.249586	0.267138
1,6,9,15	0.0185605	0.0584985	0.751032	-0.239744	0.276865
1,6,10,11	-0.135424	0.0586147	0.0208725	-0.394242	0.123393
1,6,10,12	-0.0412258	0.0585998	0.481742	-0.299978	0.217526
1,6,10,13	-0.0842223	0.0585743	0.150482	-0.342861	0.174417
1,6,10,14	0.0521532	0.0586183	0.37363	-0.206681	0.310987
1,6,10,15	-0.0159377	0.0586065	0.785667	-0.274719	0.242844
1,6,11,12	0.173974	0.0585671	0.0029757	-0.0846335	0.432581
1,6,11,13	0.0194885	0.0585583	0.739284	-0.23908	0.278057
1,6,11,14	-0.0252477	0.0586277	0.666731	-0.284123	0.233627
1,6,11,15	-0.0765341	0.058603	0.191572	-0.3353	0.182232
1,6,12,13	-0.0154224	0.0585343	0.792185	-0.273885	0.24304
1,6,12,14	0.00199768	0.0585692	0.972791	-0.256619	0.260614
1,6,12,15	0.0686571	0.058575	0.241158	-0.189985	0.327299
1,6,13,14	0.0188824	0.0585521	0.747085	-0.239659	0.277424
1,6,13,15	0.00727994	0.0585548	0.901057	-0.251273	0.265833
1,6,14,15	-0.0730392	0.0586069	0.212681	-0.331822	0.185744
1,7,8,9	-0.087591	0.0584082	0.133721	-0.345497	0.170315
1,7,8,10	0.136634	0.0585465	0.0196148	-0.121882	0.395151
1,7,8,11	-0.0522758	0.0585021	0.371559	-0.310596	0.206044
1,7,8,12	0.0245569	0.0584679	0.674484	-0.233613	0.282726
1,7,8,13	-0.0392951	0.0584559	0.501451	-0.297412	0.218821
1,7,8,14	-0.0761484	0.0585332	0.193288	-0.334606	0.182309
1,7,8,15	0.0593722	0.0584883	0.310061	-0.198887	0.317632
1,7,9,10	0.0192716	0.0584665	0.741691	-0.238892	0.277435
1,7,9,11	0.0311451	0.0584559	0.594178	-0.226971	0.289262
1,7,9,12	-0.0938826	0.0584014	0.107948	-0.351758	0.163993
1,7,9,13	0.0163676	0.0583914	0.779243	-0.241464	0.274199
1,7,9,14	0.0981388	0.0584825	0.0933412	-0.160095	0.356373
1,7,9,15	0.114958	0.0584357	0.0491636	-0.143069	0.372985
1,7,10,11	-0.0453438	0.0585631	0.438776	-0.303934	0.213246
1,7,10,12	-0.0344311	0.058536	0.5564	-0.292901	0.224039
1,7,10,13	-0.044675	0.0585093	0.445139	-0.303027	0.213677
1,7,10,14	0.126336	0.0585864	0.0310611	-0.132357	0.385029
1,7,10,15	-0.0575143	0.0585467	0.325928	-0.316032	0.201003
1,7,11,12	0.0136858	0.0585109	0.815064	-0.244673	0.272045
1,7,11,13	0.0210353	0.0584928	0.719132	-0.237244	0.279315
1,7,11,14	0.0826276	0.0586016	0.158555	-0.176132	0.341387
1,7,11,15	0.0180765	0.0585497	0.757523	-0.240454	0.276607
1,7,12,13	0.022207	0.0584539	0.704018	-0.235901	0.280315
1,7,12,14	0.0399602	0.0585293	0.494778	-0.21848	0.298401
1,7,12,15	-0.0177527	0.0585013	0.761544	-0.27607	0.240564
1,7,13,14	-0.0241823	0.0585066	0.679372	-0.282523	0.234158
1,7,13,15	-0.0874983	0.0584846	0.134641	-0.345741	0.170745
1,7,14,15	-0.0415239	0.0585652	0.478318	-0.300123	0.217075
1,8,9,10	0.129513	0.0585075	0.0268642	-0.128832	0.387857
1,8,9,11	0.0156686	0.0584554	0.788667	-0.242445	0.273783
1,8,9,12	0.0256457	0.0584216	0.660683	-0.23232	0.283611
1,8,9,13	-0.0717847	0.0584219	0.219184	-0.329751	0.186182
1,8,9,14	-0.0677182	0.0584824	0.246905	-0.325952	0.190515
1,8,9,15	0.0489456	0.058448	0.402363	-0.209136	0.307027
1,8,10,11	0.158365	0.0585908	0.00687805	-0.100347	0.417077
1,8,10,12	0.0944444	0.0585735	0.106885	-0.164191	0.35308
1,8,10,13	-0.0581677	0.0585691	0.320648	-0.316784	0.200449
1,8,10,14	-0.0133524	0.0586137	0.819801	-0.272165	0.245461
1,8,10,15	0.15772	0.0585796	0.00709841	-0.100943	0.416382
1,8,11,12	-0.0123538	0.0585085	0.832775	-0.270702	0.245995
1,8,11,13	0.0255483	0.0585114	0.662377	-0.232813	0.28391
1,8,11,14	0.182044	0.0585816	0.00188857	-0.0766277	0.440715
1,8,11,15	0.00611049	0.0585401	0.916868	-0.252378	0.264599
1,8,12,13	0.0548575	0.0584945	0.348343	-0.203429	0.313144
1,8,12,14	-0.0246965	0.0585275	0.673055	-0.283129	0.233736
1,8,12,15	0.0672162	0.0585145	0.250685	-0.191159	0.325591
1,8,13,14	0.0480759	0.0585259	0.4114	-0.21035	0.306502
1,8,13,15	0.0314123	0.0585118	0.591373	-0.226951	0.289776
1,8,14,15	-0.0570719	0.0585617	0.329788	-0.315656	0.201512
1,9,10,11	0.0155989	0.0585208	0.789815	-0.242804	0.274002
1,9,10,12	-0.0521585	0.058485	0.372494	-0.310404	0.206087
1,9,10,13	0.00299532	0.0584715	0.959145	-0.25519	0.261181
1,9,10,14	0.0827281	0.058531	0.157548	-0.17572	0.341176
1,9,10,15	-0.0422113	0.0585089	0.470638	-0.300562	0.216139
1,9,11,12	0.104741	0.0584553	0.0731741	-0.153373	0.362855
1,9,11,13	-0.0334681	0.0584475	0.566908	-0.291548	0.224611
1,9,11,14	0.0102359	0.0585389	0.861194	-0.248247	0.268719
1,9,11,15	-0.045643	0.058503	0.435291	-0.303968	0.212682
1,9,12,13	0.113264	0.0584174	0.0525281	-0.144683	0.37121
1,9,12,14	-0.0276089	0.0584658	0.636772	-0.285769	0.230551
1,9,12,15	-0.0643734	0.058463	0.270864	-0.322521	0.193774
1,9,13,14	0.0421338	0.0584587	0.471073	-0.215995	0.300263
1,9,13,15	0.0855686	0.058452	0.143229	-0.172531	0.343668
1,9,14,15	0.0544	0.0585169	0.352562	-0.203986	0.312786
1,10,11,12	0.0817516	0.0585791	0.162854	-0.176909	0.340412
1,10,11,13	-0.0950278	0.0585613	0.104664	-0.35361	0.163554
1,10,11,14	0.0701081	0.0586322	0.231814	-0.188787	0.329003
1,10,11,15	0.00101095	0.0586094	0.986238	-0.257783	0.259805
1,10,12,13	-0.0504148	0.0585566	0.389268	-0.308976	0.208146
1,10,12,14	0.0206251	0.0585928	0.724835	-0.238096	0.279346
1,10,12,15	0.00174237	0.0585862	0.976274	-0.256949	0.260434
1,10,13,14	-0.00923682	0.058568	0.874686	-0.267848	0.249375
1,10,13,15	0.0759551	0.0585639	0.194655	-0.182638	0.334548
1,10,14,15	-0.165996	0.0586205	0.00463352	-0.424839	0.0928475
1,11,12,13	0.0973787	0.0585105	0.096065	-0.160979	0.355736
1,11,12,14	0.0990188	0.0585855	0.0910094	-0.15967	0.357708
1,11,12,15	0.0669298	0.0585616	0.253092	-0.191653	0.325513
1,11,13,14	0.088493	0.0585758	0.130866	-0.170153	0.347139
1,11,13,15	0.00200566	0.0585576	0.972677	-0.25656	0.260571
1,11,14,15	-0.0569813	0.0586359	0.331168	-0.315893	0.20193
1,12,13,14	0.0326445	0.058519	0.576955	-0.22575	0.291039
1,12,13,15	0.0499504	0.0585341	0.39347	-0.208511	0.308412
1,12,14,15	-0.00275431	0.0585738	0.962495	-0.261391	0.255883
1,13,14,15	-0.0258105	0.0585593	0.659391	-0.284384	0.232763
2,3,4,5	-0.782193	0.058711	2.28974e-40	-1.04144	-0.52295
2,3,4,6	0.0449624	0.0586856	0.44359	-0.214168	0.304093
2,3,4,7	-0.290732	0.0586226	7.11457e-07	-0.549585	-0.0318796
2,3,4,8	0.343787	0.058702	4.78281e-09	0.0845836	0.60299
2,3,4,9	0.0135517	0.058588	0.81708	-0.245148	0.272251
2,3,4,10	0.568724	0.0588076	4.35254e-22	0.309054	0.828394
2,3,4,11	0.26005	0.0586711	9.35865e-06	0.000983123	0.519117
2,3,4,12	0.223612	0.0586656	0.000138354	-0.0354302	0.482654
2,3,4,13	-0.00713094	0.0586303	0.903196	-0.266017	0.251756
2,3,4,14	-0.115488	0.0586875	0.0490968	-0.374626	0.143651
2,3,4,15	0.237698	0.0586872	5.13057e-05	-0.0214399	0.496835
2,3,5,6	0.0411326	0.0588004	0.484228	-0.218505	0.30077
2,3,5,7	0.0101845	0.0587607	0.8624	-0.249278	0.269647
2,3,5,8	0.128952	0.0587957	0.0283003	-0.130665	0.388568
2,3,5,9	0.238237	0.0587018	4.9543e-05	-0.0209651	0.497439
2,3,5,10	-0.128254	0.058878	0.0293926	-0.388234	0.131727
2,3,5,11	0.0877038	0.0588063	0.135868	-0.17196	0.347368
2,3,5,12	0.00238132	0.0587787	0.967684	-0.25716	0.261923
2,3,5,13	0.0926789	0.0587588	0.114743	-0.166775	0.352133
2,3,5,14	0.0135142	0.0588084	0.818249	-0.246159	0.273187
2,3,5,15	0.0227031	0.0588306	0.699569	-0.237068	0.282474
2,3,6,7	-0.0266058	0.0586144	0.649895	-0.285422	0.232211
2,3,6,8	0.012724	0.058665	0.828294	-0.246316	0.271764
2,3,6,9	0.0481743	0.0585803	0.410878	-0.210492	0.30684
2,3,6,10	0.0924294	0.0587534	0.11569	-0.167001	0.351859
2,3,6,11	-0.12883	0.0586886	0.0281613	-0.387974	0.130314
2,3,6,12	-0.0349673	0.0586708	0.551186	-0.294033	0.224098
2,3,6,13	0.0122371	0.0586447	0.834711	-0.246713	0.271187
2,3,6,14	-0.0566907	0.0586826	0.334024	-0.315808	0.202427
2,3,6,15	-0.080828	0.0586921	0.168477	-0.339987	0.178331
2,3,7,8	-0.161352	0.0585911	0.00589348	-0.420066	0.0973612
2,3,7,9	-0.0356061	0.0585226	0.542916	-0.294017	0.222805
2,3,7,10	-0.00777811	0.0586952	0.894576	-0.266951	0.251395
2,3,7,11	-0.0584663	0.0586293	0.318667	-0.317349	0.200416
2,3,7,12	0.067095	0.058601	0.252241	-0.191662	0.325852
2,3,7,13	0.0597446	0.0585691	0.307704	-0.198872	0.318361
2,3,7,14	-0.101126	0.0586387	0.0846191	-0.360049	0.157798
2,3,7,15	0.117055	0.0586209	0.045855	-0.14179	0.3759
2,3,8,9	-0.144465	0.0585639	0.0136392	-0.403058	0.114129
2,3,8,10	0.565048	0.0587499	7.28818e-22	0.305633	0.824462
2,3,8,11	-0.0453254	0.058639	0.439554	-0.30425	0.213599
2,3,8,12	-0.021266	0.0586355	0.716846	-0.280176	0.237644
2,3,8,13	0.0732318	0.0586243	0.211613	-0.185628	0.332092
2,3,8,14	-0.0582596	0.0586674	0.320695	-0.31731	0.200791
2,3,8,15	0.0701153	0.0586458	0.231874	-0.18884	0.32907
2,3,9,10	0.0309391	0.0586523	0.597851	-0.228045	0.289923
2,3,9,11	-0.0672004	0.0585787	0.251317	-0.325859	0.191458
2,3,9,12	0.0342585	0.0585581	0.558529	-0.224309	0.292826
2,3,9,13	0.0289236	0.0585361	0.621228	-0.229547	0.287394
2,3,9,14	-0.0314661	0.0585941	0.59126	-0.290193	0.227261
2,3,9,15	-0.0344151	0.0585905	0.556951	-0.293126	0.224296
2,3,10,11	0.169438	0.0587322	0.0039181	-0.0898981	0.428774
2,3,10,12	0.0340389	0.0587443	0.562295	-0.225351	0.293429
2,3,10,13	0.0207495	0.0587066	0.723758	-0.238474	0.279973
2,3,10,14	0.0671956	0.0587542	0.252769	-0.192238	0.326629
2,3,10,15	0.081067	0.0587511	0.167648	-0.178353	0.340487
2,3,11,12	0.0532737	0.0586571	0.363769	-0.205731	0.312279
2,3,11,13	-0.0355978	0.058637	0.543798	-0.294514	0.223318
2,3,11,14	0.015148	0.0586978	0.796357	-0.244037	0.274333
2,3,11,15	-0.144972	0.0586928	0.0135168	-0.404135	0.11419
2,3,12,13	0.00554555	0.0586324	0.924648	-0.25335	0.264441
2,3,12,14	0.0427508	0.0586568	0.466112	-0.216253	0.301754
2,3,12,15	0.0431336	0.0586834	0.462333	-0.215987	0.302255
2,3,13,14	0.0982316	0.0586336	0.0938779	-0.16067	0.357133
2,3,13,15	-0.011082	0.0586426	0.850114	-0.270023	0.247859
2,3,14,15	-0.0161258	0.0586961	0.783523	-0.275303	0.243051
2,4,5,6	-0.0663635	0.0586084	0.25751	-0.325153	0.192426
2,4,5,7	-0.322032	0.0585705	3.87157e-08	-0.580655	-0.0634099
2,4,5,8	-0.239946	0.0586275	4.27584e-05	-0.49882	0.0189283
2,4,5,9	-0.00648928	0.0585076	0.911686	-0.264834	0.251855
2,4,5,10	-0.243881	0.0586861	3.25323e-05	-0.503014	0.0152524
2,4,5,11	-0.159146	0.058624	0.00663801	-0.418005	0.0997128
2,4,5,12	-0.0579787	0.0585862	0.322363	-0.31667	0.200713
2,4,5,13	0.0650679	0.0585663	0.266573	-0.193536	0.323672
2,4,5,14	-0.0823151	0.0586185	0.160255	-0.34115	0.176519
2,4,5,15	-0.0858348	0.0586326	0.143222	-0.344732	0.173062
2,4,6,7	0.0455254	0.0585338	0.436716	-0.212935	0.303986
2,4,6,8	0.117948	0.0585994	0.0441474	-0.140802	0.376698
2,4,6,9	0.110946	0.0584945	0.0578783	-0.14734	0.369233
2,4,6,10	0.100732	0.0586732	0.0860227	-0.158344	0.359808
2,4,6,11	0.00777797	0.058603	0.894413	-0.250988	0.266544
2,4,6,12	0.0108236	0.0585736	0.853398	-0.247813	0.26946
2,4,6,13	0.0138453	0.0585457	0.813057	-0.244668	0.272358
2,4,6,14	-0.0263749	0.0585938	0.652619	-0.2851	0.232351
2,4,6,15	0.0151338	0.058602	0.796218	-0.243628	0.273895
2,4,7,8	0.33903	0.0585428	7.06824e-09	0.0805299	0.597531
2,4,7,9	0.0781459	0.0584465	0.181217	-0.179929	0.336221
2,4,7,10	0.00720371	0.0586221	0.9022	-0.251646	0.266054
2,4,7,11	-0.0462754	0.0585546	0.429363	-0.304828	0.212277
2,4,7,12	0.0625736	0.0585189	0.284949	-0.195821	0.320968
2,4,7,13	0.0593985	0.0584859	0.309827	-0.198851	0.317648
2,4,7,14	-0.114604	0.0585643	0.0503697	-0.3732	0.143991
2,4,7,15	0.155348	0.0585458	0.00797218	-0.103165	0.413861
2,4,8,9	0.216433	0.0585088	0.000216743	-0.0419166	0.474784
2,4,8,10	0.940874	0.0586985	1.48083e-57	0.681686	1.20006
2,4,8,11	0.113977	0.0585905	0.0517482	-0.144734	0.372687
2,4,8,12	-0.00555375	0.058568	0.924454	-0.264165	0.253058
2,4,8,13	0.0498399	0.0585595	0.394723	-0.208734	0.308414
2,4,8,14	0.0901139	0.0586076	0.124163	-0.168673	0.3489
2,4,8,15	0.337593	0.0585867	8.38837e-09	0.0788994	0.596287
2,4,9,10	0.0718978	0.0585771	0.219681	-0.186754	0.330549
2,4,9,11	-0.0226338	0.0585009	0.698835	-0.280949	0.235681
2,4,9,12	-0.0208887	0.058468	0.720894	-0.279059	0.237281
2,4,9,13	0.146241	0.0584442	0.0123474	-0.111824	0.404305
2,4,9,14	-0.00308309	0.0585093	0.957976	-0.261435	0.255269
2,4,9,15	0.0103935	0.058508	0.859005	-0.247953	0.26874
2,4,10,11	0.152662	0.0586638	0.00926483	-0.106373	0.411696
2,4,10,12	-0.0131398	0.0586612	0.822763	-0.272163	0.245883
2,4,10,13	0.0506734	0.0586233	0.387381	-0.208182	0.309529
2,4,10,14	-0.00800579	0.0586764	0.891475	-0.267096	0.251084
2,4,10,15	0.166301	0.058674	0.0045958	-0.0927789	0.42538
2,4,11,12	0.0150127	0.0585671	0.797696	-0.243595	0.27362
2,4,11,13	-0.0497905	0.0585443	0.395068	-0.308297	0.208716
2,4,11,14	-0.00111693	0.0586213	0.984799	-0.259964	0.25773
2,4,11,15	-0.118933	0.0586121	0.0424524	-0.377739	0.139873
2,4,12,13	-0.0274509	0.0585321	0.639081	-0.285904	0.231002
2,4,12,14	0.0192215	0.0585637	0.742752	-0.239371	0.277814
2,4,12,15	0.0379583	0.0585864	0.517053	-0.220734	0.296651
2,4,13,14	0.0702933	0.0585399	0.229849	-0.188194	0.328781
2,4,13,15	-0.0373992	0.0585525	0.523004	-0.295942	0.221144
2,4,14,15	0.0779912	0.0586129	0.183326	-0.180818	0.336801
2,5,6,7	0.00721661	0.0587274	0.9022	-0.252099	0.266532
2,5,6,8	-0.0320205	0.0587524	0.585753	-0.291446	0.227405
2,5,6,9	0.108004	0.0586657	0.0656326	-0.151039	0.367047
2,5,6,10	0.00711987	0.0587946	0.903615	-0.252492	0.266732
2,5,6,11	-0.0401695	0.0587905	0.494446	-0.299764	0.219425
2,5,6,12	-0.0426544	0.0587471	0.467803	-0.302057	0.216748
2,5,6,13	-0.0719664	0.0587409	0.22053	-0.331341	0.187409
2,5,6,14	0.00176733	0.0587778	0.976013	-0.25777	0.261305
2,5,6,15	-0.0275442	0.058791	0.639423	-0.28714	0.232052
2,5,7,8	-0.0744862	0.0587081	0.204539	-0.333716	0.184744
2,5,7,9	0.0160766	0.0586332	0.783941	-0.242823	0.274976
2,5,7,10	-0.107299	0.0587617	0.0678618	-0.366766	0.152168
2,5,7,11	0.0863019	0.0587572	0.141902	-0.173145	0.345749
2,5,7,12	-0.109928	0.0587095	0.0611612	-0.369165	0.149308
2,5,7,13	0.0125632	0.0586917	0.830506	-0.246594	0.271721
2,5,7,14	-0.111354	0.0587684	0.0581299	-0.370851	0.148142
2,5,7,15	0.046938	0.0587499	0.424329	-0.212477	0.306352
2,5,8,9	0.0865237	0.0586486	0.140146	-0.172444	0.345491
2,5,8,10	0.046109	0.058797	0.432926	-0.213514	0.305732
2,5,8,11	0.0834722	0.0587525	0.155403	-0.175954	0.342898
2,5,8,12	0.0122725	0.058717	0.834441	-0.246997	0.271542
2,5,8,13	-0.0590858	0.0587198	0.314312	-0.318368	0.200196
2,5,8,14	0.0133462	0.0587655	0.820341	-0.246137	0.27283
2,5,8,15	0.125973	0.0587579	0.0320475	-0.133477	0.385423
2,5,9,10	-0.227189	0.0587001	0.00010894	-0.486384	0.0320055
2,5,9,11	0.0797661	0.0586876	0.174106	-0.179373	0.338906
2,5,9,12	-0.0107489	0.0586371	0.854554	-0.269666	0.248168
2,5,9,13	0.0164146	0.0586303	0.779504	-0.242472	0.275301
2,5,9,14	0.0624174	0.0586978	0.287625	-0.196767	0.321602
2,5,9,15	0.119136	0.0586933	0.0423867	-0.140029	0.378301
2,5,10,11	0.107295	0.058802	0.0680596	-0.152349	0.36694
2,5,10,12	-0.01232	0.0587898	0.834013	-0.271911	0.247271
2,5,10,13	-0.0429734	0.0587621	0.464595	-0.302442	0.216495
2,5,10,14	0.0084368	0.0588142	0.885937	-0.251262	0.268136
2,5,10,15	-0.039967	0.0588205	0.496843	-0.299693	0.219759
2,5,11,12	0.0327143	0.0587585	0.577697	-0.226738	0.292167
2,5,11,13	-0.00476915	0.0587508	0.935303	-0.264188	0.25465
2,5,11,14	0.13199	0.058823	0.0248503	-0.127747	0.391727
2,5,11,15	0.0524114	0.0588148	0.37287	-0.20729	0.312113
2,5,12,13	0.0439922	0.0587298	0.453826	-0.215333	0.303318
2,5,12,14	-0.0382161	0.0587567	0.515431	-0.297661	0.221228
2,5,12,15	0.0610514	0.0587766	0.298952	-0.198481	0.320584
2,5,13,14	0.0535114	0.0587463	0.362361	-0.205887	0.31291
2,5,13,15	0.0913915	0.0587573	0.119861	-0.168056	0.350839
2,5,14,15	-0.0695369	0.0588142	0.237091	-0.329235	0.190161
2,6,7,8	-0.0721245	0.0585813	0.218264	-0.330795	0.186546
2,6,7,9	0.0433429	0.0585209	0.458918	-0.215061	0.301746
2,6,7,10	0.0880623	0.0586492	0.133236	-0.170908	0.347032
2,6,7,11	-0.090935	0.0586346	0.120943	-0.34984	0.16797
2,6,7,12	0.0512155	0.0585939	0.382085	-0.20751	0.309941
2,6,7,13	-0.0269856	0.0585758	0.645021	-0.285632	0.23166
2,6,7,14	0.046721	0.058639	0.425599	-0.212204	0.305646
2,6,7,15	0.159352	0.0586219	0.00656608	-0.0994977	0.418201
2,6,8,9	0.0782493	0.0585475	0.181394	-0.180272	0.33677
2,6,8,10	0.0432259	0.0586937	0.461454	-0.215941	0.302392
2,6,8,11	-0.0930659	0.0586464	0.112548	-0.352024	0.165892
2,6,8,12	0.0685494	0.0586207	0.242264	-0.190295	0.327393
2,6,8,13	-0.0207032	0.0586154	0.723939	-0.279524	0.238118
2,6,8,14	-0.0628149	0.0586493	0.284168	-0.321785	0.196156
2,6,8,15	-0.0944109	0.0586367	0.107388	-0.353326	0.164504
2,6,9,10	-0.214985	0.0586111	0.000244937	-0.473787	0.043817
2,6,9,11	0.0107779	0.0585907	0.854053	-0.247934	0.26949
2,6,9,12	0.0313711	0.0585545	0.59213	-0.227181	0.289923
2,6,9,13	0.0701815	0.0585401	0.230592	-0.188307	0.32867
2,6,9,14	0.0213074	0.0585924	0.716119	-0.237412	0.280027
2,6,9,15	0.0658279	0.0585896	0.261217	-0.192879	0.324535
2,6,10,11	-0.157206	0.0587057	0.00741392	-0.416425	0.102014
2,6,10,12	-0.00494078	0.0586977	0.932919	-0.264125	0.254243
2,6,10,13	-0.0555866	0.0586709	0.343428	-0.314652	0.203479
2,6,10,14	0.00111421	0.0587079	0.984858	-0.258115	0.260343
2,6,10,15	-0.0637231	0.0587119	0.277775	-0.32297	0.195524
2,6,11,12	-0.0974214	0.0586664	0.0968051	-0.356467	0.161624
2,6,11,13	-0.038857	0.0586549	0.507677	-0.297852	0.220138
2,6,11,14	0.0505554	0.0587147	0.389227	-0.208704	0.309815
2,6,11,15	-0.00876041	0.0587052	0.881376	-0.267978	0.250457
2,6,12,13	-0.0467332	0.0586362	0.425456	-0.305646	0.212179
2,6,12,14	0.0728018	0.0586565	0.214559	-0.186201	0.331804
2,6,12,15	0.0367481	0.0586812	0.531167	-0.222363	0.295859
2,6,13,14	-0.0349928	0.05864	0.550687	-0.293922	0.223937
2,6,13,15	-0.0186127	0.0586474	0.750968	-0.277575	0.240349
2,6,14,15	0.0182516	0.0586888	0.755811	-0.240893	0.277396
2,7,8,9	-0.0552514	0.0584921	0.344873	-0.313528	0.203025
2,7,8,10	0.104367	0.0586357	0.075101	-0.154544	0.363277
2,7,8,11	0.102238	0.0585898	0.0809987	-0.156469	0.360946
2,7,8,12	-0.014899	0.0585518	0.799143	-0.273439	0.243641
2,7,8,13	0.00317579	0.0585442	0.95674	-0.255331	0.261682
2,7,8,14	0.0953785	0.058612	0.103688	-0.163427	0.354184
2,7,8,15	-0.0246014	0.0585749	0.67449	-0.283243	0.234041
2,7,9,10	-0.144437	0.0585591	0.0136494	-0.40301	0.114135
2,7,9,11	0.0169503	0.0585455	0.772183	-0.241562	0.275462
2,7,9,12	0.0463714	0.0584983	0.427962	-0.211932	0.304675
2,7,9,13	0.0170366	0.0584777	0.770797	-0.241176	0.275249
2,7,9,14	0.0285081	0.0585634	0.626411	-0.230083	0.287099
2,7,9,15	0.0705777	0.0585291	0.227884	-0.187862	0.329018
2,7,10,11	-0.0527716	0.0586617	0.368345	-0.311797	0.206253
2,7,10,12	0.020535	0.0586381	0.726192	-0.238386	0.279456
2,7,10,13	-0.013858	0.0586003	0.81306	-0.272612	0.244896
2,7,10,14	-0.0950899	0.0586802	0.105141	-0.354197	0.164017
2,7,10,15	0.0385811	0.0586568	0.510708	-0.220422	0.297585
2,7,11,12	0.0342145	0.0586139	0.559409	-0.2246	0.293029
2,7,11,13	-0.0157825	0.0585901	0.787646	-0.274492	0.242927
2,7,11,14	0.0476215	0.0586868	0.417113	-0.211514	0.306758
2,7,11,15	0.108043	0.0586504	0.0654649	-0.150933	0.367018
2,7,12,13	-0.0717974	0.0585588	0.220182	-0.330368	0.186774
2,7,12,14	-0.0216262	0.0586151	0.712165	-0.280446	0.237193
2,7,12,15	0.0314433	0.0586086	0.591621	-0.227348	0.290234
2,7,13,14	-0.0487261	0.0585902	0.405618	-0.307435	0.209983
2,7,13,15	-0.0637827	0.058576	0.276213	-0.322429	0.194864
2,7,14,15	-0.0805579	0.0586521	0.169612	-0.339541	0.178425
2,8,9,10	-0.0577741	0.0585965	0.324159	-0.316511	0.200963
2,8,9,11	-0.0040161	0.0585463	0.945311	-0.262532	0.2545
2,8,9,12	-0.090397	0.058512	0.122375	-0.348761	0.167967
2,8,9,13	0.0573947	0.0585074	0.326611	-0.200949	0.315738
2,8,9,14	-0.0671446	0.0585671	0.251617	-0.325752	0.191463
2,8,9,15	0.0381311	0.0585397	0.514812	-0.220355	0.296617
2,8,10,11	0.191097	0.0586743	0.00112771	-0.0679839	0.450177
2,8,10,12	-0.026567	0.0586701	0.650682	-0.285629	0.232495
2,8,10,13	0.0601818	0.0586598	0.304925	-0.198835	0.319198
2,8,10,14	0.0128517	0.0587007	0.826702	-0.246346	0.272049
2,8,10,15	0.230045	0.0586773	8.85808e-05	-0.0290492	0.489139
2,8,11,12	-0.063062	0.0586025	0.281894	-0.321826	0.195702
2,8,11,13	-0.0915011	0.0586058	0.118465	-0.350279	0.167277
2,8,11,14	0.0825669	0.0586633	0.159299	-0.176465	0.341599
2,8,11,15	-0.0182566	0.0586356	0.755531	-0.277167	0.240653
2,8,12,13	-0.0420211	0.0585931	0.473277	-0.300743	0.216701
2,8,12,14	0.0425196	0.0586087	0.468162	-0.216271	0.301311
2,8,12,15	-0.0309051	0.0586089	0.597982	-0.289697	0.227887
2,8,13,14	-0.0817073	0.0586034	0.163256	-0.340475	0.17706
2,8,13,15	0.136266	0.0586014	0.020063	-0.122493	0.395025
2,8,14,15	-0.240755	0.0586432	4.0478e-05	-0.499698	0.0181889
2,9,10,11	-0.106885	0.0586126	0.0682254	-0.365694	0.151923
2,9,10,12	-0.132448	0.0585944	0.0238027	-0.391177	0.12628
2,9,10,13	-0.070836	0.0585637	0.226461	-0.329429	0.187757
2,9,10,14	-0.00857018	0.0586217	0.883769	-0.267419	0.250278
2,9,10,15	-0.207509	0.058614	0.00040039	-0.466324	0.0513051
2,9,11,12	0.0324654	0.0585493	0.579244	-0.226064	0.290994
2,9,11,13	0.100017	0.0585386	0.0875419	-0.158464	0.358499
2,9,11,14	0.0058102	0.0586217	0.921049	-0.253038	0.264659
2,9,11,15	-0.132055	0.0586034	0.0242441	-0.390823	0.126713
2,9,12,13	-0.0137398	0.0585132	0.814354	-0.272109	0.24463
2,9,12,14	-0.0487342	0.0585593	0.405292	-0.307307	0.209839
2,9,12,15	-0.0622648	0.0585667	0.287726	-0.320871	0.196341
2,9,13,14	-0.0101021	0.0585451	0.863004	-0.268612	0.248408
2,9,13,15	-0.0593042	0.0585443	0.311079	-0.317811	0.199202
2,9,14,15	0.0177273	0.0586034	0.762277	-0.241041	0.276495
2,10,11,12	-0.0221799	0.0586849	0.705471	-0.281308	0.236948
2,10,11,13	-0.0250616	0.0586556	0.669189	-0.28406	0.233937
2,10,11,14	-0.0231026	0.058722	0.694011	-0.282394	0.236189
2,10,11,15	-0.173817	0.0587185	0.00307727	-0.433093	0.0854587
2,10,12,13	-0.0559867	0.058664	0.339909	-0.315022	0.203048
2,10,12,14	-0.0355996	0.0586909	0.544148	-0.294754	0.223555
2,10,12,15	-0.109011	0.0587049	0.0633317	-0.368227	0.150205
2,10,13,14	-0.0591755	0.0586601	0.313086	-0.318194	0.199843
2,10,13,15	-0.0108462	0.0586658	0.853324	-0.26989	0.248197
2,10,14,15	-0.137768	0.0587194	0.0189726	-0.397048	0.121512
2,11,12,13	-0.0543384	0.0586179	0.353938	-0.31317	0.204493
2,11,12,14	0.0133082	0.0586755	0.820573	-0.245778	0.272394
2,11,12,15	-0.0335345	0.0586806	0.567682	-0.292643	0.225574
2,11,13,14	-0.0640819	0.0586602	0.274656	-0.3231	0.194937
2,11,13,15	0.0382671	0.0586569	0.514156	-0.220737	0.297271
2,11,14,15	-0.0604828	0.0587293	0.303086	-0.319806	0.198841
2,12,13,14	-0.0244343	0.0586181	0.6768	-0.283267	0.234398
2,12,13,15	0.0670189	0.0586432	0.253122	-0.191925	0.325962
2,12,14,15	-0.106192	0.0586727	0.0703221	-0.365266	0.152882
2,13,14,15	0.00963075	0.0586441	0.869556	-0.249317	0.268578
3,4,5,6	-0.414024	0.0586192	1.66965e-12	-0.672862	-0.155187
3,4,5,7	-0.69447	0.0585712	2.38599e-32	-0.953096	-0.435845
3,4,5,8	-2.53163	0.0586477	0	-2.79059	-2.27266
3,4,5,9	-0.686163	0.0585258	1.14477e-31	-0.944588	-0.427738
3,4,5,10	-1.01057	0.0587304	5.30257e-66	-1.2699	-0.751243
3,4,5,11	-0.797377	0.0586058	5.09321e-42	-1.05616	-0.538599
3,4,5,12	-0.130188	0.058591	0.0262926	-0.388901	0.128525
3,4,5,13	-0.0250914	0.0585808	0.668421	-0.28376	0.233577
3,4,5,14	-0.204144	0.0586337	0.00049906	-0.463046	0.0547576
3,4,5,15	-0.871254	0.0586265	9.27826e-50	-1.13012	-0.612384
3,4,6,7	-0.111459	0.0585497	0.0569655	-0.369989	0.147072
3,4,6,8	-0.0777811	0.0586341	0.184669	-0.336684	0.181122
3,4,6,9	-0.0462283	0.0585215	0.429571	-0.304634	0.212178
3,4,6,10	0.210333	0.0587236	0.000341901	-0.0489653	0.469632
3,4,6,11	0.0479376	0.0586011	0.413346	-0.21082	0.306695
3,4,6,12	0.0489262	0.0585894	0.403687	-0.20978	0.307632
3,4,6,13	0.00108293	0.0585731	0.985249	-0.257551	0.259717
3,4,6,14	-0.0823326	0.0586251	0.160214	-0.341196	0.176531
3,4,6,15	0.0258821	0.0586049	0.658755	-0.232892	0.284656
3,4,7,8	-0.37692	0.0585589	1.24227e-10	-0.635492	-0.118349
3,4,7,9	-0.427552	0.0584575	2.66739e-13	-0.685676	-0.169428
3,4,7,10	0.173863	0.0586785	0.0030494	-0.0852361	0.432963
3,4,7,11	-0.286433	0.0585341	9.96579e-07	-0.544895	-0.0279716
3,4,7,12	0.115546	0.0585261	0.0483608	-0.14288	0.373973
3,4,7,13	-0.0583989	0.0584976	0.318137	-0.3167	0.199902
3,4,7,14	-0.480841	0.0585784	2.33869e-16	-0.739498	-0.222183
3,4,7,15	-0.348741	0.0585443	2.60298e-09	-0.607247	-0.090234
3,4,8,9	-0.836166	0.0585375	4.04161e-46	-1.09464	-0.577689
3,4,8,10	0.545709	0.0587689	1.72393e-20	0.28621	0.805208
3,4,8,11	-0.237538	0.0585866	5.03867e-05	-0.496232	0.0211553
3,4,8,12	0.295188	0.0585975	4.74561e-07	0.0364463	0.553929
3,4,8,13	0.0734534	0.0585839	0.209919	-0.185228	0.332135
3,4,8,14	-0.357195	0.0586321	1.12927e-09	-0.616089	-0.0982998
3,4,8,15	-0.133005	0.0585931	0.0232168	-0.391727	0.125717
3,4,9,10	1.5355	0.0586354	2.73609e-149	1.27659	1.7944
3,4,9,11	-0.271462	0.0584951	3.48743e-06	-0.529752	-0.0131728
3,4,9,12	0.0735294	0.0584871	0.208695	-0.184725	0.331784
3,4,9,13	-0.11521	0.0584673	0.0487904	-0.373377	0.142957
3,4,9,14	-0.278398	0.0585324	1.98185e-06	-0.536853	-0.0199439
3,4,9,15	-0.0793417	0.0585097	0.175097	-0.337696	0.179012
3,4,10,11	0.0698664	0.0586947	0.233925	-0.189304	0.329037
3,4,10,12	0.152736	0.0587037	0.00927823	-0.106474	0.411947
3,4,10,13	0.0970195	0.0586732	0.098229	-0.162056	0.356095
3,4,10,14	-0.124129	0.0587199	0.0345313	-0.383411	0.135153
3,4,10,15	0.322216	0.0587027	4.07988e-08	0.0630094	0.581422
3,4,11,12	0.123071	0.0585578	0.0355894	-0.135496	0.381637
3,4,11,13	-0.0597967	0.0585408	0.307049	-0.318288	0.198694
3,4,11,14	-0.366418	0.058614	4.12963e-10	-0.625233	-0.107603
3,4,11,15	0.122832	0.0585871	0.0360408	-0.135864	0.381528
3,4,12,13	0.0048597	0.0585503	0.933852	-0.253673	0.263393
3,4,12,14	0.0395235	0.0585834	0.499902	-0.219156	0.298203
3,4,12,15	0.157961	0.058584	0.00701541	-0.100721	0.416643
3,4,13,14	-0.100181	0.0585674	0.0871814	-0.358789	0.158428
3,4,13,15	-0.0956952	0.0585555	0.102215	-0.354251	0.162861
3,4,14,15	0.507946	0.058608	4.68719e-18	0.249158	0.766734
3,5,6,7	-0.0118168	0.0586618	0.840356	-0.270842	0.247209
3,5,6,8	-0.0715843	0.0587123	0.222764	-0.330833	0.187664
3,5,6,9	0.0676456	0.0586069	0.248418	-0.191138	0.326429
3,5,6,10	-0.147532	0.0587766	0.0120771	-0.407065	0.112
3,5,6,11	-0.0563948	0.0587145	0.336816	-0.315653	0.202863
3,5,6,12	-0.103333	0.0586914	0.078316	-0.362489	0.155824
3,5,6,13	0.0183506	0.0586833	0.754507	-0.24077	0.277471
3,5,6,14	0.0447034	0.0587225	0.446505	-0.21459	0.303997
3,5,6,15	-0.025777	0.0587243	0.660701	-0.285079	0.233525
3,5,7,8	-0.0220677	0.0586452	0.706702	-0.28102	0.236884
3,5,7,9	0.101953	0.0585637	0.0817128	-0.156639	0.360546
3,5,7,10	-0.186066	0.0587373	0.00153785	-0.445425	0.0732929
3,5,7,11	-0.0245266	0.058668	0.675908	-0.28358	0.234526
3,5,7,12	-0.109696	0.0586368	0.0613882	-0.368611	0.149219
3,5,7,13	0.0408338	0.0586279	0.486128	-0.218042	0.29971
3,5,7,14	0.338055	0.0586937	8.52079e-09	0.0788882	0.597221
3,5,7,15	0.0584439	0.0586785	0.319258	-0.200655	0.317543
3,5,8,9	0.171664	0.0586021	0.00339992	-0.0870979	0.430426
3,5,8,10	0.0893902	0.0587788	0.128324	-0.170152	0.348932
3,5,8,11	-0.0279327	0.0586806	0.634069	-0.287041	0.231176
3,5,8,12	-0.087309	0.0586763	0.136769	-0.346399	0.171781
3,5,8,13	0.0292309	0.0586807	0.618393	-0.229878	0.28834
3,5,8,14	-0.0670012	0.0587192	0.253861	-0.32628	0.192278
3,5,8,15	0.0190527	0.0586893	0.745459	-0.240094	0.2782
3,5,9,10	-0.466461	0.0586832	1.95632e-15	-0.725581	-0.207341
3,5,9,11	0.0790084	0.0586085	0.177647	-0.179782	0.337799
3,5,9,12	0.0342755	0.0585835	0.558505	-0.224405	0.292956
3,5,9,13	0.0640621	0.0585776	0.274128	-0.194592	0.322716
3,5,9,14	0.00684344	0.0586374	0.907092	-0.252074	0.265761
3,5,9,15	0.0683442	0.0586248	0.24371	-0.190518	0.327206
3,5,10,11	0.0485336	0.0587703	0.408914	-0.210971	0.308038
3,5,10,12	0.130793	0.0587584	0.0260264	-0.12866	0.390245
3,5,10,13	-0.0322867	0.0587409	0.582567	-0.291661	0.227088
3,5,10,14	0.0711516	0.0587871	0.226164	-0.188427	0.33073
3,5,10,15	-0.173411	0.0587747	0.00317594	-0.432936	0.0861129
3,5,11,12	0.0164997	0.0586829	0.778584	-0.242619	0.275618
3,5,11,13	-0.0532422	0.0586779	0.364222	-0.312339	0.205854
3,5,11,14	0.135583	0.0587451	0.0210069	-0.12381	0.394977
3,5,11,15	-0.124936	0.0587349	0.0334187	-0.384285	0.134412
3,5,12,13	-0.00978903	0.0586674	0.867484	-0.26884	0.249262
3,5,12,14	-0.111854	0.0586949	0.0567022	-0.371026	0.147318
3,5,12,15	-0.152372	0.058712	0.00945759	-0.411619	0.106876
3,5,13,14	0.147	0.0586946	0.0122689	-0.112171	0.40617
3,5,13,15	-0.0439337	0.0586966	0.454172	-0.303113	0.215245
3,5,14,15	-0.480515	0.0587446	2.96866e-16	-0.739906	-0.221124
3,6,7,8	-0.157567	0.0585271	0.00710244	-0.415998	0.100864
3,6,7,9	0.0583056	0.0584502	0.318518	-0.199786	0.316397
3,6,7,10	0.000817465	0.0586074	0.988871	-0.257968	0.259603
3,6,7,11	0.114656	0.0585547	0.0502287	-0.143897	0.373208
3,6,7,12	0.0177525	0.0585272	0.761647	-0.240679	0.276184
3,6,7,13	0.0287877	0.0585073	0.622698	-0.229556	0.287131
3,6,7,14	0.056879	0.0585711	0.331502	-0.201746	0.315504
3,6,7,15	0.0284235	0.0585439	0.627321	-0.230082	0.286929
3,6,8,9	0.00570897	0.0584989	0.922258	-0.252597	0.264015
3,6,8,10	0.0928506	0.0586703	0.113528	-0.166212	0.351914
3,6,8,11	0.00616581	0.058579	0.916173	-0.252494	0.264826
3,6,8,12	0.0481484	0.0585777	0.411107	-0.210506	0.306803
3,6,8,13	0.0313226	0.0585723	0.592815	-0.227308	0.289953
3,6,8,14	-0.0568507	0.0586022	0.332	-0.315613	0.201912
3,6,8,15	-0.0143927	0.05857	0.805889	-0.273013	0.244228
3,6,9,10	-0.162805	0.0585759	0.00545007	-0.421451	0.0958417
3,6,9,11	0.0308024	0.0585048	0.598549	-0.22753	0.289135
3,6,9,12	-0.0506938	0.0584851	0.38607	-0.308939	0.207552
3,6,9,13	0.0350681	0.0584748	0.548702	-0.223132	0.293268
3,6,9,14	0.0260325	0.0585208	0.656438	-0.232371	0.284436
3,6,9,15	0.0141055	0.0585093	0.809494	-0.244247	0.272458
3,6,10,11	-0.0370203	0.0586633	0.528004	-0.296052	0.222012
3,6,10,12	-0.0637102	0.0586627	0.27747	-0.32274	0.19532
3,6,10,13	0.000290078	0.0586386	0.996053	-0.258633	0.259213
3,6,10,14	0.0442978	0.0586754	0.450277	-0.214788	0.303383
3,6,10,15	0.0311955	0.058662	0.59488	-0.227831	0.290222
3,6,11,12	0.0703351	0.0585845	0.229927	-0.188349	0.329019
3,6,11,13	0.0702269	0.0585745	0.230564	-0.188413	0.328867
3,6,11,14	0.0467174	0.0586299	0.425564	-0.212167	0.305602
3,6,11,15	0.022535	0.058611	0.700623	-0.236267	0.281336
3,6,12,13	-0.0853723	0.0585715	0.144969	-0.343999	0.173254
3,6,12,14	0.0142668	0.0585922	0.807626	-0.244451	0.272985
3,6,12,15	-0.0247022	0.0586007	0.673369	-0.283458	0.234054
3,6,13,14	-0.00839976	0.058578	0.88598	-0.267055	0.250256
3,6,13,15	0.0785749	0.0585761	0.179797	-0.180072	0.337222
3,6,14,15	0.0628548	0.0586133	0.283566	-0.195957	0.321666
3,7,8,9	-0.416888	0.0584241	9.88307e-13	-0.674864	-0.158912
3,7,8,10	-0.0078447	0.0586209	0.893545	-0.26669	0.251
3,7,8,11	-0.0243081	0.0585057	0.677792	-0.282644	0.234028
3,7,8,12	0.0904539	0.0584962	0.122038	-0.16784	0.348748
3,7,8,13	0.00954579	0.0584848	0.870348	-0.248698	0.26779
3,7,8,14	0.208836	0.0585534	0.000362289	-0.0497113	0.467382
3,7,8,15	-0.134209	0.0585013	0.0217911	-0.392526	0.124108
3,7,9,10	-0.216497	0.0585271	0.000216805	-0.474928	0.041934
3,7,9,11	0.150202	0.0584562	0.0101902	-0.107915	0.40832
3,7,9,12	0.0359762	0.0584232	0.538041	-0.221996	0.293948
3,7,9,13	0.0663536	0.0584039	0.255918	-0.191533	0.32424
3,7,9,14	-0.124674	0.0584851	0.0330381	-0.38292	0.133571
3,7,9,15	0.108233	0.058445	0.0640545	-0.149835	0.366301
3,7,10,11	0.0278258	0.0586111	0.634966	-0.230976	0.286628
3,7,10,12	0.0294745	0.0585982	0.614973	-0.22927	0.288219
3,7,10,13	0.0988604	0.0585668	0.0914238	-0.159746	0.357466
3,7,10,14	-0.261509	0.0586411	8.24905e-06	-0.520443	-0.00257453
3,7,10,15	-0.0382054	0.0586087	0.514489	-0.296996	0.220586
3,7,11,12	0.0348884	0.0585276	0.551112	-0.223545	0.293322
3,7,11,13	0.00922214	0.0585038	0.874747	-0.249106	0.26755
3,7,11,14	0.182232	0.0585934	0.00187213	-0.0764917	0.440955
3,7,11,15	0.128946	0.0585602	0.0276786	-0.129631	0.387522
3,7,12,13	0.00102381	0.0584866	0.986034	-0.257228	0.259276
3,7,12,14	-0.035197	0.0585417	0.547692	-0.293693	0.223298
3,7,12,15	0.00297188	0.0585335	0.959507	-0.255487	0.261431
3,7,13,14	-0.0454297	0.058521	0.43758	-0.303834	0.212974
3,7,13,15	0.00678551	0.0585036	0.907666	-0.251541	0.265112
3,7,14,15	-0.0142541	0.0585737	0.807733	-0.272891	0.244382
3,8,9,10	0.139429	0.0585831	0.0173188	-0.119249	0.398107
3,8,9,11	-0.102839	0.0584668	0.0785996	-0.361004	0.155325
3,8,9,12	0.176971	0.0584615	0.00247118	-0.0811704	0.435112
3,8,9,13	0.0358341	0.0584552	0.539869	-0.222279	0.293947
3,8,9,14	0.0667063	0.0585072	0.254239	-0.191637	0.325049
3,8,9,15	-0.103287	0.0584676	0.0773111	-0.361456	0.154881
3,8,10,11	0.112829	0.0586445	0.0543718	-0.14612	0.371778
3,8,10,12	0.287102	0.0586431	9.85011e-07	0.0281584	0.546045
3,8,10,13	0.0980495	0.0586336	0.0944881	-0.160851	0.356951
3,8,10,14	-0.160734	0.0586749	0.00615915	-0.419817	0.0983493
3,8,10,15	0.433314	0.0586292	1.5025e-13	0.174432	0.692196
3,8,11,12	0.0889013	0.0585317	0.12881	-0.16955	0.347352
3,8,11,13	-0.00906916	0.0585323	0.876868	-0.267523	0.249385
3,8,11,14	0.0134083	0.0585902	0.818988	-0.245301	0.272118
3,8,11,15	0.103804	0.0585476	0.0762441	-0.154718	0.362325
3,8,12,13	0.0909135	0.0585422	0.120445	-0.167584	0.349411
3,8,12,14	-0.0493164	0.058563	0.399735	-0.307906	0.209273
3,8,12,15	0.0285987	0.0585459	0.625211	-0.229915	0.287112
3,8,13,14	0.0418453	0.058559	0.474872	-0.216726	0.300417
3,8,13,15	0.152275	0.058533	0.00928636	-0.106182	0.410731
3,8,14,15	-0.498138	0.0585696	1.9074e-17	-0.756756	-0.23952
3,9,10,11	-0.00433039	0.0585638	0.941056	-0.262923	0.254263
3,9,10,12	-0.00942721	0.058552	0.87209	-0.267968	0.249114
3,9,10,13	-0.0546879	0.0585343	0.350164	-0.313151	0.203775
3,9,10,14	-0.172717	0.0585845	0.00319931	-0.431402	0.085967
3,9,10,15	0.0126449	0.0585614	0.829047	-0.245937	0.271227
3,9,11,12	-0.0316521	0.0584653	0.588248	-0.28981	0.226506
3,9,11,13	-0.0794789	0.0584605	0.173989	-0.337615	0.178658
3,9,11,14	0.0119256	0.0585335	0.838559	-0.246534	0.270385
3,9,11,15	-0.0653452	0.0585054	0.264043	-0.32368	0.19299
3,9,12,13	0.00946757	0.0584454	0.871315	-0.248603	0.267538
3,9,12,14	0.0260232	0.0584868	0.656366	-0.23223	0.284276
3,9,12,15	-0.011346	0.0584904	0.846192	-0.269615	0.246923
3,9,13,14	0.00190662	0.0584762	0.97399	-0.256299	0.260113
3,9,13,15	0.0207771	0.0584682	0.722325	-0.237394	0.278948
3,9,14,15	0.0829869	0.058522	0.156189	-0.175421	0.341395
3,10,11,12	0.200823	0.058636	0.000615921	-0.0580888	0.459735
3,10,11,13	0.0460106	0.0586095	0.432439	-0.212784	0.304805
3,10,11,14	-0.0703402	0.0586795	0.230648	-0.329444	0.188764
3,10,11,15	0.0372096	0.0586506	0.525807	-0.221767	0.296186
3,10,12,13	0.00879894	0.0586262	0.880698	-0.250069	0.267667
3,10,12,14	-0.149238	0.0586592	0.01096	-0.408252	0.109777
3,10,12,15	0.0216432	0.0586524	0.712124	-0.237341	0.280627
3,10,13,14	-0.0429464	0.0586277	0.463853	-0.301821	0.215929
3,10,13,15	0.0858857	0.0586159	0.14287	-0.172937	0.344709
3,10,14,15	-0.356617	0.0586637	1.22557e-09	-0.615651	-0.0975826
3,11,12,13	-0.185833	0.0585391	0.00150258	-0.444317	0.0726508
3,11,12,14	0.105674	0.0585917	0.0713094	-0.153042	0.36439
3,11,12,15	0.0237866	0.0585889	0.684752	-0.234917	0.28249
3,11,13,14	-0.0531273	0.058577	0.364434	-0.311779	0.205524
3,11,13,15	-0.054578	0.0585676	0.351407	-0.313188	0.204032
3,11,14,15	-0.0510373	0.0586427	0.384139	-0.309979	0.207904
3,12,13,14	-0.0506921	0.0585491	0.386605	-0.30922	0.207836
3,12,13,15	-0.0210043	0.0585717	0.719891	-0.279632	0.237623
3,12,14,15	-0.101199	0.0586003	0.0841907	-0.359953	0.157555
3,13,14,15	0.00966846	0.0585764	0.8689	-0.24898	0.268317
4,5,6,7	0.0383026	0.0584827	0.512512	-0.219932	0.296537
4,5,6,8	-0.087882	0.0585546	0.133405	-0.346434	0.17067
4,5,6,9	0.199197	0.058424	0.000651742	-0.0587783	0.457173
4,5,6,10	-0.159178	0.0585925	0.00659795	-0.417897	0.0995416
4,5,6,11	0.00474098	0.0585345	0.935447	-0.253723	0.263205
4,5,6,12	0.0959476	0.0585007	0.100994	-0.162367	0.354262
4,5,6,13	-0.00827547	0.058492	0.887492	-0.266551	0.250001
4,5,6,14	0.11269	0.0585362	0.054223	-0.145781	0.371161
4,5,6,15	0.0601022	0.0585372	0.304554	-0.198373	0.318578
4,5,7,8	0.0768326	0.0584994	0.189062	-0.181476	0.335141
4,5,7,9	0.328523	0.0583935	1.8624e-08	0.0706821	0.586364
4,5,7,10	-0.442956	0.0585585	4.02254e-14	-0.701525	-0.184387
4,5,7,11	0.159112	0.0584988	0.006534	-0.0991939	0.417417
4,5,7,12	0.0282101	0.0584544	0.629384	-0.2299	0.28632
4,5,7,13	0.0841818	0.058443	0.149763	-0.173878	0.342241
4,5,7,14	0.252278	0.0585197	1.63104e-05	-0.00612053	0.510676
4,5,7,15	0.116487	0.0584997	0.046464	-0.141823	0.374797
4,5,8,9	0.0594235	0.0584523	0.309345	-0.198677	0.317524
4,5,8,10	-0.691411	0.0586287	5.08038e-32	-0.950291	-0.432532
4,5,8,11	-0.165108	0.0585323	0.00479387	-0.423562	0.0933458
4,5,8,12	-0.125737	0.0585084	0.0316401	-0.384085	0.132611
4,5,8,13	0.0151389	0.0585166	0.795861	-0.243246	0.273524
4,5,8,14	0.00560588	0.0585598	0.923736	-0.252969	0.264181
4,5,8,15	-0.0614378	0.0585358	0.293922	-0.319907	0.197031
4,5,9,10	-0.493895	0.0585018	3.26332e-17	-0.752214	-0.235575
4,5,9,11	0.135622	0.0584355	0.0203008	-0.122405	0.393648
4,5,9,12	0.0907156	0.0583915	0.120298	-0.167117	0.348548
4,5,9,13	0.0472919	0.0583859	0.417954	-0.210515	0.305099
4,5,9,14	0.0352468	0.0584502	0.546498	-0.222844	0.293338
4,5,9,15	0.200603	0.0584444	0.000599223	-0.0574627	0.458669
4,5,10,11	-0.369787	0.0585987	2.8245e-10	-0.628534	-0.11104
4,5,10,12	-0.104334	0.0585711	0.0748702	-0.362959	0.154291
4,5,10,13	-0.131967	0.0585501	0.024209	-0.3905	0.126565
4,5,10,14	-0.0840621	0.0586057	0.151479	-0.34284	0.174716
4,5,10,15	-0.293657	0.0585999	5.44288e-07	-0.552409	-0.0349045
4,5,11,12	-0.105585	0.0584959	0.0710852	-0.363878	0.152708
4,5,11,13	-0.0324371	0.058494	0.579215	-0.290722	0.225847
4,5,11,14	0.113293	0.0585702	0.0530845	-0.145328	0.371915
4,5,11,15	-0.100974	0.0585528	0.0846309	-0.359518	0.157571
4,5,12,13	-0.03974	0.0584705	0.496727	-0.297921	0.218441
4,5,12,14	0.0838589	0.0585053	0.151768	-0.174476	0.342194
4,5,12,15	0.039468	0.0585175	0.500022	-0.218921	0.297857
4,5,13,14	0.0284377	0.0584971	0.626874	-0.229861	0.286736
4,5,13,15	-0.0159573	0.0585052	0.785047	-0.274292	0.242377
4,5,14,15	0.114567	0.0585637	0.050442	-0.144025	0.373159
4,6,7,8	-0.0256033	0.0584837	0.661545	-0.283842	0.232636
4,6,7,9	-0.0389314	0.0583828	0.504887	-0.296725	0.218862
4,6,7,10	0.0868003	0.058548	0.138206	-0.171723	0.345324
4,6,7,11	0.00488882	0.0584858	0.933383	-0.25336	0.263138
4,6,7,12	-0.0350532	0.0584469	0.548681	-0.29313	0.223024
4,6,7,13	0.108538	0.0584254	0.0632204	-0.149444	0.366519
4,6,7,14	0.0210449	0.0584994	0.71904	-0.237264	0.279354
4,6,7,15	-0.0126322	0.0584742	0.828966	-0.27083	0.245565
4,6,8,9	0.0676251	0.0584451	0.247254	-0.190444	0.325694
4,6,8,10	0.377048	0.058627	1.28637e-10	0.118176	0.63592
4,6,8,11	0.00910294	0.058531	0.87641	-0.249345	0.267551
4,6,8,12	0.00706267	0.0585117	0.903925	-0.2513	0.265426
4,6,8,13	0.0199249	0.0585029	0.733422	-0.238399	0.278249
4,6,8,14	-0.100225	0.0585463	0.086928	-0.358741	0.158291
4,6,8,15	-0.0595009	0.058517	0.30925	-0.317887	0.198885
4,6,9,10	-0.0965522	0.0585023	0.0988725	-0.354873	0.161769
4,6,9,11	0.0663814	0.0584347	0.255969	-0.191641	0.324404
4,6,9,12	-0.0221755	0.0583996	0.704156	-0.280043	0.235692
4,6,9,13	0.025858	0.0583855	0.657853	-0.231947	0.283663
4,6,9,14	-0.084941	0.058445	0.146139	-0.343009	0.173127
4,6,9,15	-0.0884433	0.058434	0.13015	-0.346463	0.169577
4,6,10,11	0.00927382	0.0585909	0.874237	-0.249439	0.267986
4,6,10,12	0.073569	0.0585797	0.209171	-0.185094	0.332232
4,6,10,13	-0.0901437	0.0585541	0.123695	-0.348694	0.168406
4,6,10,14	0.0300436	0.0585968	0.608154	-0.228695	0.288782
4,6,10,15	0.0531172	0.058592	0.364648	-0.2056	0.311835
4,6,11,12	-0.0065507	0.0585021	0.910845	-0.264871	0.25177
4,6,11,13	0.0645351	0.058488	0.269867	-0.193723	0.322793
4,6,11,14	-0.0453466	0.0585581	0.438709	-0.303914	0.213221
4,6,11,15	-0.0908927	0.0585366	0.120495	-0.349366	0.16758
4,6,12,13	-0.0256108	0.0584712	0.661384	-0.283795	0.232573
4,6,12,14	-0.0331548	0.0585035	0.570912	-0.291481	0.225172
4,6,12,15	-0.0261691	0.0585122	0.654704	-0.284534	0.232196
4,6,13,14	-0.00936511	0.0584877	0.872787	-0.267622	0.248892
4,6,13,15	-0.0162679	0.0584866	0.780901	-0.27452	0.241984
4,6,14,15	-0.00495871	0.0585357	0.932491	-0.263427	0.25351
4,7,8,9	-0.116612	0.0583932	0.0458341	-0.374451	0.141228
4,7,8,10	1.02466	0.058579	3.92299e-68	0.766004	1.28332
4,7,8,11	-0.151029	0.0584779	0.0098093	-0.409242	0.107185
4,7,8,12	-0.0315585	0.0584487	0.589246	-0.289643	0.226526
4,7,8,13	-0.0188584	0.0584416	0.746934	-0.276912	0.239195
4,7,8,14	0.031325	0.058515	0.592424	-0.227052	0.289702
4,7,8,15	0.0414059	0.058464	0.478809	-0.216746	0.299558
4,7,9,10	0.128105	0.058465	0.0284497	-0.130051	0.386262
4,7,9,11	-0.00684924	0.058401	0.906639	-0.264723	0.251025
4,7,9,12	0.0682525	0.0583505	0.242132	-0.189398	0.325904
4,7,9,13	0.0522755	0.0583292	0.370146	-0.205282	0.309833
4,7,9,14	-0.141516	0.0584243	0.0154327	-0.399493	0.116461
4,7,9,15	0.12617	0.058377	0.0306814	-0.131598	0.383938
4,7,10,11	0.0133118	0.0585525	0.820155	-0.245231	0.271855
4,7,10,12	0.042815	0.0585282	0.464463	-0.215621	0.301251
4,7,10,13	0.0272983	0.058501	0.640769	-0.231017	0.285614
4,7,10,14	-0.184984	0.0585824	0.0015921	-0.443659	0.073691
4,7,10,15	0.13479	0.058547	0.0213281	-0.123728	0.393309
4,7,11,12	-0.0827641	0.0584503	0.156795	-0.340856	0.175328
4,7,11,13	-0.0114222	0.058431	0.845018	-0.269429	0.246584
4,7,11,14	0.0321442	0.0585394	0.582938	-0.226341	0.290629
4,7,11,15	0.0510778	0.058492	0.382537	-0.207198	0.309354
4,7,12,13	-0.0574431	0.0584022	0.325332	-0.315322	0.200436
4,7,12,14	-0.102572	0.0584666	0.0793793	-0.360735	0.155592
4,7,12,15	0.0459806	0.058452	0.431501	-0.212119	0.30408
4,7,13,14	-0.0741794	0.0584466	0.204387	-0.332255	0.183896
4,7,13,15	0.00115877	0.058423	0.984176	-0.256812	0.25913
4,7,14,15	0.0540205	0.0585081	0.355859	-0.204327	0.312368
4,8,9,10	0.777329	0.0585434	4.16051e-40	0.518826	1.03583
4,8,9,11	-0.165682	0.0584284	0.00457674	-0.423677	0.0923128
4,8,9,12	0.128624	0.0584032	0.027649	-0.12926	0.386508
4,8,9,13	0.0397242	0.0583972	0.496358	-0.218133	0.297581
4,8,9,14	-0.0681437	0.0584608	0.243774	-0.326282	0.189994
4,8,9,15	0.0661494	0.0584211	0.257524	-0.191813	0.324112
4,8,10,11	0.212656	0.0586106	0.00028584	-0.0461437	0.471455
4,8,10,12	0.162481	0.0585931	0.00555735	-0.0962414	0.421204
4,8,10,13	0.0574928	0.0585836	0.326414	-0.201188	0.316173
4,8,10,14	0.260521	0.0586333	8.89719e-06	0.0016213	0.519421
4,8,10,15	0.827721	0.0585915	3.75385e-45	0.569006	1.08644
4,8,11,12	-0.0281213	0.0584823	0.630626	-0.286354	0.230112
4,8,11,13	0.00351815	0.0584816	0.95203	-0.254712	0.261748
4,8,11,14	-0.0904225	0.0585529	0.122531	-0.348967	0.168122
4,8,11,15	0.0560015	0.0585046	0.338467	-0.20233	0.314333
4,8,12,13	0.00902862	0.0584673	0.877278	-0.249138	0.267195
4,8,12,14	-0.0137967	0.0584986	0.813553	-0.272102	0.244508
4,8,12,15	-0.0466505	0.0584839	0.425072	-0.304891	0.21159
4,8,13,14	0.0366808	0.0584975	0.530633	-0.221619	0.294981
4,8,13,15	0.00729138	0.058476	0.90077	-0.250914	0.265496
4,8,14,15	0.0571402	0.0585197	0.328862	-0.201258	0.315538
4,9,10,11	0.149275	0.058503	0.0107291	-0.109049	0.407599
4,9,10,12	0.0361922	0.0584719	0.535943	-0.221995	0.294379
4,9,10,13	-0.0385655	0.0584563	0.509431	-0.296684	0.219553
4,9,10,14	0.0324077	0.0585134	0.579685	-0.225963	0.290778
4,9,10,15	0.142401	0.0584926	0.0149181	-0.115877	0.40068
4,9,11,12	-0.0705872	0.0583868	0.22669	-0.328399	0.187224
4,9,11,13	-0.0983579	0.058381	0.0920468	-0.356144	0.159428
4,9,11,14	-0.146364	0.0584705	0.0123131	-0.404545	0.111817
4,9,11,15	-0.111334	0.0584359	0.0567603	-0.369362	0.146694
4,9,12,13	0.0455406	0.0583519	0.435135	-0.212117	0.303198
4,9,12,14	-0.0358107	0.0584028	0.539771	-0.293693	0.222071
4,9,12,15	0.00916777	0.0584038	0.875268	-0.248719	0.267054
4,9,13,14	-0.0464758	0.0583926	0.426086	-0.304313	0.211361
4,9,13,15	-0.0737802	0.0583858	0.20636	-0.331587	0.184027
4,9,14,15	0.0889784	0.0584465	0.127923	-0.169097	0.347054
4,10,11,12	0.100429	0.0585599	0.0863603	-0.158147	0.359005
4,10,11,13	0.00224662	0.0585324	0.969383	-0.256208	0.260701
4,10,11,14	0.0170185	0.0586124	0.771546	-0.241789	0.275826
4,10,11,15	-0.0541126	0.0585844	0.355667	-0.312797	0.204571
4,10,12,13	-0.00913495	0.0585385	0.875995	-0.267616	0.249346
4,10,12,14	-0.0611629	0.0585734	0.296398	-0.319798	0.197473
4,10,12,15	0.0231095	0.0585723	0.69318	-0.235521	0.28174
4,10,13,14	-0.0853191	0.0585477	0.145056	-0.343841	0.173203
4,10,13,15	-0.000264811	0.0585445	0.996391	-0.258773	0.258243
4,10,14,15	0.110668	0.0585968	0.0589527	-0.148071	0.369406
4,11,12,13	-0.0965457	0.0584466	0.0985745	-0.354621	0.16153
4,11,12,14	0.0242416	0.0585143	0.678668	-0.234133	0.282616
4,11,12,15	0.00359166	0.0585061	0.951049	-0.254746	0.26193
4,11,13,14	0.0563969	0.0584992	0.335024	-0.201911	0.314705
4,11,13,15	-0.0858757	0.0584852	0.142026	-0.344121	0.17237
4,11,14,15	-0.0688168	0.0585711	0.240034	-0.327442	0.189808
4,12,13,14	-0.0684771	0.0584548	0.241427	-0.326589	0.189635
4,12,13,15	-0.0737157	0.0584741	0.207444	-0.331912	0.184481
4,12,14,15	0.150331	0.0585127	0.0101986	-0.108036	0.408698
4,13,14,15	0.0336303	0.0584918	0.565325	-0.224645	0.291905
5,6,7,8	-0.0719793	0.05862	0.219496	-0.33082	0.186862
5,6,7,9	0.14467	0.0585454	0.0134772	-0.113842	0.403181
5,6,7,10	-0.0675738	0.0586579	0.249332	-0.326582	0.191435
5,6,7,11	0.0687757	0.0586608	0.241035	-0.190246	0.327797
5,6,7,12	-0.00366164	0.0586161	0.95019	-0.262485	0.255162
5,6,7,13	0.0119384	0.0586088	0.838592	-0.246853	0.27073
5,6,7,14	0.0351615	0.0586805	0.549043	-0.223947	0.294269
5,6,7,15	0.0565527	0.0586577	0.334998	-0.202455	0.31556
5,6,8,9	0.0194493	0.0585677	0.73983	-0.239161	0.27806
5,6,8,10	-0.248072	0.0587083	2.39199e-05	-0.507303	0.0111594
5,6,8,11	-0.015041	0.0586654	0.797655	-0.274083	0.244001
5,6,8,12	0.0444958	0.0586395	0.447977	-0.214431	0.303423
5,6,8,13	0.110743	0.0586507	0.0590138	-0.148234	0.369719
5,6,8,14	0.103958	0.0586841	0.0764926	-0.155167	0.363082
5,6,8,15	0.109484	0.0586692	0.0620356	-0.149575	0.368542
5,6,9,10	-0.105499	0.0586119	0.0718776	-0.364305	0.153306
5,6,9,11	0.0292338	0.0585973	0.617859	-0.229507	0.287975
5,6,9,12	0.0599622	0.0585536	0.305818	-0.198586	0.31851
5,6,9,13	-0.051978	0.0585565	0.374734	-0.310539	0.206583
5,6,9,14	0.0415567	0.0586097	0.478305	-0.217239	0.300352
5,6,9,15	0.162582	0.0586048	0.00553735	-0.0961918	0.421356
5,6,10,11	-0.0407442	0.0587073	0.487675	-0.299971	0.218483
5,6,10,12	0.038402	0.0586821	0.512854	-0.220713	0.297517
5,6,10,13	-0.000822609	0.0586736	0.988814	-0.259901	0.258255
5,6,10,14	0.0594001	0.0587127	0.311687	-0.19985	0.318651
5,6,10,15	-0.0495621	0.0587162	0.398623	-0.308828	0.209704
5,6,11,12	0.108913	0.0586724	0.0634223	-0.150159	0.367986
5,6,11,13	-0.0367208	0.058671	0.531401	-0.295787	0.222345
5,6,11,14	0.041565	0.0587382	0.479181	-0.217798	0.300928
5,6,11,15	0.131792	0.0587212	0.0248164	-0.127496	0.39108
5,6,12,13	0.0248804	0.0586484	0.671402	-0.234086	0.283847
5,6,12,14	0.0863317	0.0586742	0.141202	-0.172749	0.345412
5,6,12,15	0.0340431	0.0586858	0.561858	-0.225088	0.293175
5,6,13,14	0.0187938	0.0586743	0.748738	-0.240287	0.277875
5,6,13,15	0.0711573	0.0586785	0.225269	-0.187942	0.330257
5,6,14,15	-0.109421	0.0587201	0.0624129	-0.368704	0.149862
5,7,8,9	0.186213	0.058529	0.00146654	-0.0722261	0.444652
5,7,8,10	-0.665148	0.0586611	9.8402e-30	-0.92417	-0.406125
5,7,8,11	0.0807691	0.0586239	0.168292	-0.178089	0.339627
5,7,8,12	0.073753	0.0585807	0.208042	-0.184915	0.332421
5,7,8,13	0.00219442	0.0585886	0.970123	-0.256508	0.260897
5,7,8,14	0.182297	0.0586552	0.00188593	-0.0766997	0.441293
5,7,8,15	-0.0100236	0.0586212	0.864234	-0.26887	0.248823
5,7,9,10	-0.298277	0.0585782	3.56796e-07	-0.556933	-0.0396203
5,7,9,11	0.0996335	0.058583	0.0890061	-0.159044	0.358311
5,7,9,12	0.0384799	0.0585204	0.510835	-0.219921	0.296881
5,7,9,13	0.0333128	0.0585156	0.569159	-0.225067	0.291693
5,7,9,14	0.320569	0.0586043	4.53885e-08	0.0617971	0.579341
5,7,9,15	0.222153	0.0585654	0.000149011	-0.0364467	0.480753
5,7,10,11	-0.0962967	0.0586803	0.1008	-0.355404	0.16281
5,7,10,12	0.0887351	0.0586452	0.13027	-0.170217	0.347687
5,7,10,13	0.0696019	0.0586256	0.235149	-0.189264	0.328468
5,7,10,14	-0.019259	0.0586931	0.742815	-0.278423	0.239905
5,7,10,15	0.019233	0.0586845	0.743114	-0.239893	0.278359
5,7,11,12	0.0507327	0.0586333	0.386908	-0.208167	0.309633
5,7,11,13	-0.129333	0.0586301	0.0273982	-0.388219	0.129553
5,7,11,14	0.145226	0.0587278	0.0134093	-0.114091	0.404543
5,7,11,15	0.0568653	0.0586844	0.332553	-0.20226	0.315991
5,7,12,13	-0.0677585	0.0585884	0.24748	-0.32646	0.190943
5,7,12,14	0.0480335	0.0586509	0.412808	-0.210944	0.307011
5,7,12,15	-0.0140461	0.0586401	0.810697	-0.272976	0.244884
5,7,13,14	0.0573101	0.0586425	0.328439	-0.20163	0.316251
5,7,13,15	0.0376726	0.0586297	0.520521	-0.221211	0.296556
5,7,14,15	0.00328299	0.0587056	0.955404	-0.255936	0.262502
5,8,9,10	-0.40495	0.058608	4.97265e-12	-0.663738	-0.146162
5,8,9,11	0.176858	0.0585632	0.00253053	-0.0817323	0.435448
5,8,9,12	-0.0198202	0.0585233	0.73486	-0.278234	0.238594
5,8,9,13	0.00759091	0.0585388	0.896826	-0.250892	0.266073
5,8,9,14	0.0846472	0.0585963	0.148587	-0.174089	0.343384
5,8,9,15	0.209082	0.0585684	0.000357764	-0.049531	0.467695
5,8,10,11	0.0674735	0.0586995	0.250371	-0.191718	0.326665
5,8,10,12	0.0128332	0.0586747	0.826871	-0.246249	0.271916
5,8,10,13	-0.0769192	0.0586806	0.189933	-0.336028	0.18219
5,8,10,14	-0.250003	0.0587209	2.0745e-05	-0.509289	0.00928402
5,8,10,15	-0.093102	0.0586917	0.112685	-0.35226	0.166056
5,8,11,12	0.105998	0.0586221	0.0705933	-0.152852	0.364848
5,8,11,13	0.0281925	0.0586341	0.630647	-0.230711	0.287096
5,8,11,14	0.0863661	0.0587023	0.141234	-0.172838	0.345571
5,8,11,15	0.0405235	0.0586708	0.489764	-0.218542	0.299589
5,8,12,13	0.0397317	0.0586109	0.497848	-0.219069	0.298533
5,8,12,14	0.00925161	0.0586443	0.874649	-0.249697	0.2682
5,8,12,15	0.103873	0.0586341	0.0764818	-0.155031	0.362776
5,8,13,14	-0.023562	0.0586555	0.687907	-0.28256	0.235436
5,8,13,15	0.0992666	0.0586442	0.0905256	-0.159681	0.358215
5,8,14,15	-0.304912	0.0586855	2.05427e-07	-0.564043	-0.0457823
5,9,10,11	0.0261488	0.0586202	0.655549	-0.232693	0.284991
5,9,10,12	0.0215914	0.0585816	0.712451	-0.23708	0.280263
5,9,10,13	-0.0319087	0.0585751	0.585931	-0.290551	0.226734
5,9,10,14	-0.0703702	0.0586257	0.230021	-0.329236	0.188496
5,9,10,15	-0.208672	0.058627	0.000372461	-0.467544	0.0501999
5,9,11,12	0.0465334	0.0585631	0.426862	-0.212057	0.305123
5,9,11,13	0.00799635	0.0585694	0.891405	-0.250621	0.266614
5,9,11,14	0.203037	0.0586575	0.000538223	-0.0559701	0.462043
5,9,11,15	-0.0595927	0.0586241	0.30939	-0.318452	0.199266
5,9,12,13	-0.127654	0.0585332	0.0292012	-0.386111	0.130804
5,9,12,14	0.00834796	0.058576	0.886674	-0.250299	0.266995
5,9,12,15	0.0140794	0.0585751	0.810049	-0.244563	0.272722
5,9,13,14	0.0339423	0.0585777	0.562297	-0.224712	0.292597
5,9,13,15	0.0754229	0.0585779	0.197908	-0.183232	0.334078
5,9,14,15	-0.0877963	0.0586355	0.134321	-0.346706	0.171113
5,10,11,12	-0.0383327	0.0586896	0.51367	-0.297481	0.220816
5,10,11,13	-0.0433093	0.0586725	0.460428	-0.302382	0.215764
5,10,11,14	-0.0766409	0.0587416	0.192002	-0.336019	0.182737
5,10,11,15	-0.0116195	0.0587342	0.843178	-0.270965	0.247726
5,10,12,13	-0.0396105	0.0586643	0.49955	-0.298647	0.219426
5,10,12,14	0.011267	0.058695	0.847776	-0.247905	0.270439
5,10,12,15	-0.0422125	0.0587024	0.472089	-0.301417	0.216992
5,10,13,14	0.00337636	0.0586785	0.954115	-0.255723	0.262476
5,10,13,15	0.0291944	0.0586854	0.618859	-0.229935	0.288324
5,10,14,15	-0.266194	0.0587458	5.8879e-06	-0.52559	-0.00679708
5,11,12,13	0.0793253	0.0586429	0.176168	-0.179617	0.338267
5,11,12,14	-0.0154571	0.0587012	0.792307	-0.274657	0.243743
5,11,12,15	0.0289726	0.058693	0.621571	-0.230191	0.288136
5,11,13,14	0.0402327	0.0587059	0.493144	-0.218988	0.299453
5,11,13,15	0.0719102	0.0586915	0.220502	-0.187247	0.331067
5,11,14,15	0.0709789	0.0587672	0.227136	-0.188512	0.33047
5,12,13,14	-0.0781467	0.05865	0.182732	-0.33712	0.180827
5,12,13,15	0.172884	0.0586665	0.00321251	-0.0861621	0.431931
5,12,14,15	-0.272527	0.0587019	3.45752e-06	-0.53173	-0.0133239
5,13,14,15	0.0126442	0.0586975	0.829447	-0.246539	0.271828
6,7,8,9	-0.0668607	0.0584256	0.252479	-0.324843	0.191122
6,7,8,10	0.0534682	0.0585622	0.361243	-0.205118	0.312054
6,7,8,11	-0.0696675	0.0585276	0.233925	-0.328101	0.188766
6,7,8,12	0.0423345	0.0584944	0.469234	-0.215952	0.300621
6,7,8,13	0.0836985	0.0584875	0.152428	-0.174557	0.341954
6,7,8,14	0.0315086	0.0585495	0.590476	-0.227021	0.290038
6,7,8,15	-0.00717035	0.058509	0.902463	-0.265521	0.251181
6,7,9,10	-0.0148067	0.0584823	0.800129	-0.27304	0.243426
6,7,9,11	-0.0246983	0.0584802	0.672784	-0.282922	0.233526
6,7,9,12	0.0156943	0.058425	0.788222	-0.242286	0.273674
6,7,9,13	0.0334293	0.0584173	0.567158	-0.224517	0.291375
6,7,9,14	0.123575	0.0584986	0.034658	-0.13473	0.381879
6,7,9,15	0.0503639	0.0584604	0.388968	-0.207772	0.3085
6,7,10,11	-0.0245624	0.0585876	0.675042	-0.28326	0.234136
6,7,10,12	0.0725446	0.0585574	0.215407	-0.18602	0.331109
6,7,10,13	-0.0606199	0.0585348	0.300388	-0.319085	0.197845
6,7,10,14	0.0976188	0.0585992	0.0957506	-0.161131	0.356368
6,7,10,15	0.120693	0.0585745	0.0393602	-0.137947	0.379333
6,7,11,12	-0.0318834	0.0585517	0.586078	-0.290423	0.226656
6,7,11,13	0.0754619	0.0585316	0.197322	-0.182989	0.333913
6,7,11,14	0.0568871	0.0586241	0.331871	-0.201972	0.315746
6,7,11,15	0.0551157	0.0585806	0.346789	-0.203551	0.313783
6,7,12,13	-0.0194515	0.0584984	0.739504	-0.277756	0.238853
6,7,12,14	0.0191143	0.0585537	0.744094	-0.239434	0.277662
6,7,12,15	0.0747403	0.0585433	0.201731	-0.183762	0.333243
6,7,13,14	0.0268561	0.0585407	0.64641	-0.231635	0.285347
6,7,13,15	-0.00372004	0.0585148	0.94931	-0.262097	0.254657
6,7,14,15	-0.0838728	0.0585827	0.152241	-0.342549	0.174803
6,8,9,10	-0.0113214	0.0585263	0.846615	-0.269749	0.247106
6,8,9,11	0.0808161	0.0584726	0.166946	-0.177374	0.339006
6,8,9,12	-0.0157596	0.058446	0.787436	-0.273832	0.242313
6,8,9,13	-0.064633	0.0584507	0.268837	-0.322727	0.193461
6,8,9,14	-0.0451048	0.058499	0.440693	-0.303411	0.213202
6,8,9,15	-0.039605	0.0584664	0.49816	-0.297768	0.218558
6,8,10,11	-0.0420902	0.0586076	0.472659	-0.300877	0.216696
6,8,10,12	0.0255873	0.0586012	0.66238	-0.233171	0.284345
6,8,10,13	-0.117978	0.0585948	0.0440765	-0.376708	0.140752
6,8,10,14	0.0493706	0.0586245	0.399712	-0.20949	0.308231
6,8,10,15	-0.000803134	0.0585951	0.989064	-0.259534	0.257928
6,8,11,12	-0.00362236	0.0585475	0.950666	-0.262143	0.254899
6,8,11,13	0.0194062	0.0585458	0.740292	-0.239107	0.27792
6,8,11,14	-0.0243023	0.0586048	0.678379	-0.283076	0.234472
6,8,11,15	0.0282315	0.0585669	0.629782	-0.230375	0.286838
6,8,12,13	-0.0370995	0.0585354	0.52622	-0.295567	0.221368
6,8,12,14	-0.116964	0.0585537	0.0457751	-0.375512	0.141584
6,8,12,15	-0.0642327	0.0585464	0.272597	-0.322749	0.194283
6,8,13,14	0.038487	0.0585552	0.511009	-0.220068	0.297042
6,8,13,15	-0.00251634	0.0585399	0.965714	-0.261004	0.255971
6,8,14,15	-0.0955352	0.0585741	0.102899	-0.354173	0.163103
6,9,10,11	-0.0944021	0.0585378	0.106828	-0.35288	0.164076
6,9,10,12	-0.113895	0.0585096	0.0515926	-0.372249	0.144459
6,9,10,13	-0.0060808	0.0584971	0.917209	-0.264379	0.252217
6,9,10,14	0.0269917	0.0585418	0.644755	-0.231504	0.285487
6,9,10,15	-0.00730488	0.0585337	0.900684	-0.265765	0.251155
6,9,11,12	-0.0121917	0.058488	0.83488	-0.27045	0.246066
6,9,11,13	0.0248641	0.0584839	0.670735	-0.233376	0.283104
6,9,11,14	-0.110906	0.0585606	0.0582534	-0.369485	0.147673
6,9,11,15	-0.0872637	0.0585274	0.135977	-0.345696	0.171169
6,9,12,13	0.0171361	0.0584535	0.769404	-0.24097	0.275242
6,9,12,14	-0.0783562	0.05849	0.18037	-0.336623	0.179911
6,9,12,15	0.0145177	0.0584931	0.803985	-0.243763	0.272798
6,9,13,14	-0.0230874	0.058488	0.69304	-0.281346	0.235171
6,9,13,15	-0.0274005	0.0584806	0.639403	-0.285626	0.230825
6,9,14,15	-0.0952459	0.0585268	0.103666	-0.353675	0.163183
6,10,11,12	0.0630706	0.0586139	0.281922	-0.195744	0.321885
6,10,11,13	-0.0988962	0.0585931	0.0914524	-0.357619	0.159826
6,10,11,14	0.0289734	0.0586519	0.621318	-0.230008	0.287955
6,10,11,15	-0.0375845	0.0586325	0.521517	-0.296481	0.221312
6,10,12,13	0.0579268	0.0585983	0.322897	-0.200819	0.316672
6,10,12,14	0.0988913	0.058615	0.0915892	-0.159928	0.35771
6,10,12,15	0.00328814	0.0586254	0.955273	-0.255577	0.262153
6,10,13,14	0.0334828	0.0585964	0.567723	-0.225254	0.292219
6,10,13,15	0.0134818	0.0585974	0.818035	-0.245259	0.272223
6,10,14,15	-0.141498	0.0586365	0.0158227	-0.400412	0.117416
6,11,12,13	0.0137361	0.058564	0.814561	-0.244858	0.27233
6,11,12,14	-0.0311255	0.0586168	0.595423	-0.289952	0.227701
6,11,12,15	-0.0068947	0.0586089	0.906354	-0.265687	0.251897
6,11,13,14	0.0378165	0.0586103	0.518791	-0.220982	0.296615
6,11,13,15	-0.00438244	0.0585944	0.94038	-0.26311	0.254346
6,11,14,15	-0.035231	0.0586572	0.548094	-0.294236	0.223774
6,12,13,14	0.0474618	0.0585613	0.41768	-0.21112	0.306044
6,12,13,15	0.0597654	0.0585786	0.307614	-0.198893	0.318424
6,12,14,15	-0.06933	0.0585998	0.236776	-0.328082	0.189422
6,13,14,15	-0.0273874	0.0585819	0.640141	-0.28606	0.231285
7,8,9,10	-0.0884826	0.058471	0.130222	-0.346666	0.1697
7,8,9,11	-0.180058	0.058432	0.00206177	-0.438069	0.0779535
7,8,9,12	0.0301202	0.0583895	0.605963	-0.227703	0.287944
7,8,9,13	0.0301928	0.0583847	0.605066	-0.227609	0.287995
7,8,9,14	0.0191232	0.0584654	0.743606	-0.239035	0.277282
7,8,9,15	0.0115305	0.0584081	0.843507	-0.246375	0.269436
7,8,10,11	0.123773	0.0585567	0.0345468	-0.134788	0.382335
7,8,10,12	0.118103	0.0585327	0.0436297	-0.140353	0.376558
7,8,10,13	0.0284329	0.0585286	0.627116	-0.230005	0.286871
7,8,10,14	0.207152	0.058592	0.000407679	-0.0515651	0.46587
7,8,10,15	0.13484	0.0585414	0.021268	-0.123654	0.393334
7,8,11,12	-0.150509	0.0584901	0.0100804	-0.408776	0.107758
7,8,11,13	-0.0341103	0.0584858	0.559747	-0.292359	0.224138
7,8,11,14	0.132829	0.0585763	0.0233601	-0.125819	0.391477
7,8,11,15	0.0481206	0.0585149	0.410877	-0.210257	0.306498
7,8,12,13	0.0105351	0.0584568	0.85698	-0.247585	0.268656
7,8,12,14	0.055263	0.0585074	0.344898	-0.203081	0.313607
7,8,12,15	-0.1035	0.0584809	0.0767692	-0.361727	0.154726
7,8,13,14	0.131589	0.0585039	0.0245058	-0.12674	0.389917
7,8,13,15	-0.0130728	0.0584712	0.823089	-0.271257	0.245111
7,8,14,15	0.0878492	0.0585375	0.133436	-0.170628	0.346326
7,9,10,11	0.298557	0.0584978	3.3527e-07	0.0402559	0.556859
7,9,10,12	-0.0418639	0.0584593	0.473923	-0.299995	0.216268
7,9,10,13	-0.00830711	0.0584387	0.886962	-0.266348	0.249734
7,9,10,14	0.000567935	0.0585179	0.992256	-0.257822	0.258958
7,9,10,15	0.170656	0.0584849	0.00352632	-0.0875885	0.4289
7,9,11,12	-0.015578	0.0584407	0.789809	-0.273627	0.242471
7,9,11,13	0.0291396	0.0584329	0.618006	-0.228875	0.287154
7,9,11,14	0.145411	0.0585446	0.0130063	-0.113097	0.403919
7,9,11,15	0.135816	0.0584835	0.020224	-0.122422	0.394055
7,9,12,13	0.0864991	0.0583878	0.138496	-0.171317	0.344315
7,9,12,14	0.0752076	0.0584602	0.198288	-0.182928	0.333343
7,9,12,15	0.0189962	0.0584359	0.745125	-0.239032	0.277025
7,9,13,14	-0.0796689	0.0584499	0.172885	-0.337759	0.178421
7,9,13,15	-0.00963863	0.05842	0.868954	-0.267596	0.248319
7,9,14,15	0.00617949	0.0585006	0.915876	-0.252134	0.264493
7,10,11,12	0.011437	0.0585638	0.845167	-0.247156	0.27003
7,10,11,13	-0.00494098	0.0585374	0.932733	-0.263417	0.253535
7,10,11,14	0.0970357	0.0586283	0.0979161	-0.161842	0.355913
7,10,11,15	0.123963	0.0585862	0.0343624	-0.134729	0.382654
7,10,12,13	0.0231961	0.0585218	0.691838	-0.235211	0.281603
7,10,12,14	0.0282607	0.0585809	0.62951	-0.230408	0.286929
7,10,12,15	0.0162656	0.0585622	0.781207	-0.24232	0.274851
7,10,13,14	-0.101654	0.0585545	0.0825649	-0.360206	0.156898
7,10,13,15	0.0277412	0.05853	0.635528	-0.230702	0.286185
7,10,14,15	-0.1537	0.0586057	0.00873081	-0.412478	0.105078
7,11,12,13	-0.0380817	0.0585007	0.515076	-0.296396	0.220232
7,11,12,14	0.040404	0.0585929	0.490469	-0.218317	0.299125
7,11,12,15	0.0328873	0.0585581	0.574381	-0.22568	0.291455
7,11,13,14	0.00088398	0.0585744	0.987959	-0.257756	0.259524
7,11,13,15	-0.0106351	0.0585339	0.855827	-0.269096	0.247826
7,11,14,15	0.161152	0.0586328	0.00599081	-0.0977452	0.42005
7,12,13,14	-0.0154297	0.0585085	0.792	-0.273778	0.242919
7,12,13,15	-0.156133	0.0585057	0.00761951	-0.414469	0.102203
7,12,14,15	-0.198096	0.0585629	0.000718983	-0.456685	0.0604925
7,13,14,15	-0.0537329	0.0585393	0.358683	-0.312218	0.204752
8,9,10,11	0.133625	0.0585127	0.0223977	-0.124743	0.391992
8,9,10,12	0.093708	0.0584895	0.109138	-0.164557	0.351973
8,9,10,13	0.0679703	0.0584863	0.245182	-0.19028	0.326221
8,9,10,14	0.287925	0.0585373	8.76517e-07	0.0294491	0.546401
8,9,10,15	0.178563	0.0584978	0.00227182	-0.0797384	0.436865
8,9,11,12	-0.0398258	0.0584298	0.495497	-0.297827	0.218175
8,9,11,13	-0.00964491	0.0584336	0.8689	-0.267663	0.248373
8,9,11,14	-0.103042	0.0585115	0.0782404	-0.361404	0.15532
8,9,11,15	0.135954	0.0584594	0.0200462	-0.122178	0.394086
8,9,12,13	0.09441	0.0584107	0.106038	-0.163507	0.352327
8,9,12,14	0.0119103	0.058449	0.838533	-0.246176	0.269996
8,9,12,15	-0.0104709	0.0584313	0.857783	-0.268479	0.247537
8,9,13,14	0.00938776	0.0584524	0.872406	-0.248713	0.267489
8,9,13,15	0.0668124	0.0584267	0.252831	-0.191175	0.3248
8,9,14,15	0.0774092	0.0584799	0.185618	-0.180813	0.335632
8,10,11,12	0.0783606	0.0585699	0.180941	-0.180259	0.33698
8,10,11,13	0.067774	0.0585642	0.247176	-0.190821	0.326369
8,10,11,14	0.126922	0.0586273	0.0304046	-0.131952	0.385795
8,10,11,15	0.211335	0.0585887	0.000310213	-0.0473683	0.470037
8,10,12,13	0.00278194	0.0585695	0.962117	-0.255836	0.2614
8,10,12,14	-0.0491917	0.0585923	0.401163	-0.30791	0.209527
8,10,12,15	-0.0341802	0.0585697	0.559507	-0.292799	0.224439
8,10,13,14	0.0752561	0.0585845	0.198952	-0.183428	0.33394
8,10,13,15	0.131241	0.0585634	0.0250342	-0.12735	0.389831
8,10,14,15	-0.293216	0.0586007	5.66146e-07	-0.551972	-0.0344603
8,11,12,13	0.131848	0.058511	0.0242428	-0.126512	0.390207
8,11,12,14	-0.0551997	0.0585564	0.345855	-0.31376	0.203361
8,11,12,15	0.159088	0.0585293	0.00657022	-0.0993527	0.417528
8,11,13,14	0.188273	0.0585555	0.00130466	-0.0702833	0.446829
8,11,13,15	0.188825	0.0585274	0.00125564	-0.0696069	0.447257
8,11,14,15	-0.0924671	0.0585915	0.114539	-0.351183	0.166248
8,12,13,14	0.0912654	0.0585163	0.118853	-0.167118	0.349649
8,12,13,15	-0.0261148	0.0585165	0.655399	-0.284499	0.232269
8,12,14,15	-0.178372	0.0585406	0.00231377	-0.436862	0.0801184
8,13,14,15	0.034961	0.058538	0.550354	-0.223518	0.29344
9,10,11,12	0.0522849	0.0585037	0.371489	-0.206043	0.310612
9,10,11,13	-0.000362419	0.0584892	0.995056	-0.258626	0.257901
9,10,11,14	0.2089	0.0585596	0.000361295	-0.0496743	0.467474
9,10,11,15	-0.0544426	0.0585367	0.352349	-0.312916	0.204031
9,10,12,13	0.0725048	0.0584759	0.21502	-0.1857	0.33071
9,10,12,14	-0.015788	0.0585108	0.787292	-0.274147	0.242571
9,10,12,15	0.0627376	0.0585079	0.283598	-0.195609	0.321084
9,10,13,14	0.0011878	0.0584982	0.9838	-0.257115	0.259491
9,10,13,15	0.117639	0.0584946	0.0443248	-0.140649	0.375926
9,10,14,15	-0.132295	0.0585412	0.0238377	-0.390788	0.126198
9,11,12,13	0.0119055	0.0584387	0.838569	-0.246135	0.269946
9,11,12,14	0.0399928	0.0585121	0.4943	-0.218372	0.298358
9,11,12,15	0.10814	0.058492	0.0644969	-0.150136	0.366416
9,11,13,14	0.0540003	0.0585055	0.356018	-0.204335	0.312336
9,11,13,15	0.0202805	0.058478	0.728741	-0.237934	0.278495
9,11,14,15	-0.0361246	0.0585603	0.53732	-0.294702	0.222453
9,12,13,14	-0.0748929	0.0584501	0.200094	-0.332984	0.183198
9,12,13,15	0.012055	0.058459	0.836626	-0.246075	0.270185
9,12,14,15	-0.063484	0.0584951	0.277804	-0.321774	0.194805
9,13,14,15	-0.0948295	0.058488	0.104955	-0.353088	0.163429
10,11,12,13	0.0681458	0.0585654	0.244602	-0.190454	0.326746
10,11,12,14	0.128833	0.0586258	0.02799	-0.130034	0.387699
10,11,12,15	-0.0287177	0.058612	0.624164	-0.287523	0.230088
10,11,13,14	0.0270163	0.0586007	0.644785	-0.231739	0.285772
10,11,13,15	0.0448481	0.0585885	0.443995	-0.213854	0.30355
10,11,14,15	-0.0594684	0.0586586	0.310685	-0.31848	0.199543
10,12,13,14	-0.0317848	0.0585785	0.587408	-0.290442	0.226873
10,12,13,15	-0.0651683	0.0585856	0.265993	-0.323857	0.193521
10,12,14,15	-0.0685898	0.058622	0.241998	-0.32744	0.19026
10,13,14,15	-0.0199448	0.0585943	0.733567	-0.278672	0.238783
11,12,13,14	-0.00704492	0.0585687	0.904258	-0.265659	0.25157
11,12,13,15	7.42934e-05	0.0585689	0.998988	-0.258541	0.25869
11,12,14,15	-0.00430476	0.0586255	0.941466	-0.26317	0.254561
11,13,14,15	0.0512742	0.058612	0.381687	-0.207532	0.31008
12,13,14,15	0.042919	0.0585641	0.463653	-0.215675	0.301513
1,2,3,4,5	-0.230725	0.033747	8.26507e-12	-0.379738	-0.0817125
1,2,3,4,6	-0.0474579	0.0337322	0.159467	-0.196405	0.101489
1,2,3,4,7	-0.165206	0.0337452	9.85238e-07	-0.314211	-0.0162018
1,2,3,4,8	-0.27196	0.0337544	8.13698e-16	-0.421005	-0.122915
1,2,3,4,9	-0.0904824	0.0337399	0.00732793	-0.239463	0.0584985
1,2,3,4,10	-0.18522	0.0337535	4.11485e-08	-0.334261	-0.0361789
1,2,3,4,11	0.0714841	0.033742	0.0341379	-0.0775064	0.220475
1,2,3,4,12	-0.0634295	0.0337341	0.0600812	-0.212385	0.0855261
1,2,3,4,13	0.018076	0.0337257	0.591984	-0.130843	0.166995
1,2,3,4,14	-0.103032	0.0337365	0.00226024	-0.251998	0.0459344
1,2,3,4,15	-0.0406129	0.0337499	0.228852	-0.189638	0.108412
1,2,3,5,6	0.0486172	0.0337253	0.149437	-0.100299	0.197534
1,2,3,5,7	0.0509193	0.0337371	0.131235	-0.0980494	0.199888
1,2,3,5,8	0.174164	0.0337474	2.47603e-07	0.0251503	0.323178
1,2,3,5,9	-0.0231334	0.0337348	0.492881	-0.172092	0.125825
1,2,3,5,10	0.283086	0.0337414	5.10153e-17	0.134098	0.432074
1,2,3,5,11	-0.0537796	0.0337338	0.110895	-0.202734	0.0951745
1,2,3,5,12	0.0286089	0.033726	0.396293	-0.120311	0.177529
1,2,3,5,13	-0.0409919	0.0337191	0.224115	-0.189881	0.107897
1,2,3,5,14	0.063812	0.0337286	0.0585111	-0.0851189	0.212743
1,2,3,5,15	0.0510415	0.0337398	0.130343	-0.0979393	0.200022
1,2,3,6,7	0.00602152	0.0337166	0.858259	-0.142857	0.1549
1,2,3,6,8	-0.0359709	0.0337255	0.286172	-0.184889	0.112947
1,2,3,6,9	0.0202391	0.033715	0.548311	-0.128632	0.16911
1,2,3,6,10	0.0240609	0.0337229	0.475549	-0.124845	0.172967
1,2,3,6,11	-0.0099334	0.0337165	0.76829	-0.158811	0.138944
1,2,3,6,12	-0.0129009	0.0337111	0.701953	-0.161755	0.135953
1,2,3,6,13	-0.0146218	0.0337025	0.664401	-0.163438	0.134194
1,2,3,6,14	0.00592139	0.0337101	0.860565	-0.142928	0.154771
1,2,3,6,15	0.0391161	0.0337193	0.246038	-0.109774	0.188006
1,2,3,7,8	0.0887398	0.033741	0.00854254	-0.060246	0.237726
1,2,3,7,9	0.0203309	0.0337246	0.546614	-0.128583	0.169244
1,2,3,7,10	0.0294767	0.0337386	0.382301	-0.119499	0.178452
1,2,3,7,11	0.0149819	0.0337268	0.656891	-0.133941	0.163905
1,2,3,7,12	-0.0367223	0.0337185	0.276127	-0.185609	0.112164
1,2,3,7,13	-0.075914	0.0337119	0.0243403	-0.224772	0.0729437
1,2,3,7,14	0.0173599	0.033719	0.606669	-0.131529	0.166249
1,2,3,7,15	-0.0514168	0.0337283	0.12741	-0.200346	0.0975129
1,2,3,8,9	0.0319388	0.0337371	0.343802	-0.11703	0.180907
1,2,3,8,10	0.240526	0.033751	1.05556e-12	0.0914957	0.389556
1,2,3,8,11	0.0664878	0.0337342	0.0487421	-0.0824683	0.215444
1,2,3,8,12	-0.00497413	0.0337282	0.882757	-0.153904	0.143955
1,2,3,8,13	0.00133231	0.0337206	0.968484	-0.147564	0.150228
1,2,3,8,14	0.0573636	0.0337304	0.0890204	-0.0915755	0.206303
1,2,3,8,15	0.136302	0.0337446	5.37784e-05	-0.0127001	0.285304
1,2,3,9,10	0.0625098	0.0337288	0.0638495	-0.0864224	0.211442
1,2,3,9,11	0.0437435	0.0337243	0.19461	-0.105169	0.192656
1,2,3,9,12	-0.0708728	0.0337159	0.0355576	-0.219748	0.0780025
1,2,3,9,13	0.0189463	0.0337106	0.574102	-0.129906	0.167798
1,2,3,9,14	-0.034032	0.0337195	0.312856	-0.182923	0.114859
1,2,3,9,15	-0.0550692	0.0337273	0.102527	-0.203994	0.0938561
1,2,3,10,11	0.0823187	0.0337304	0.0146738	-0.0666205	0.231258
1,2,3,10,12	0.034352	0.0337253	0.308409	-0.114564	0.183268
1,2,3,10,13	0.0173505	0.0337154	0.606824	-0.131522	0.166223
1,2,3,10,14	0.0069272	0.0337282	0.837275	-0.142002	0.155857
1,2,3,10,15	0.0865936	0.0337424	0.0102839	-0.0623985	0.235586
[truncated: 2,947 more rows]
