# Supplementary material for: Hierarchical sequence-affinity landscapes shape the evolution of breadth in an anti-influenza receptor binding site antibody
Source: eLife. 2023 Jan 10;12:e83628. doi: 10.7554/eLife.83628 (PMC9995116; doi:10.7554/eLife.83628)
Supplement: Figure 4—source data 1. — Association rates, dissociation rates, and dissociation constants are reported for 12 antibody variants at multiple temperatures against MA90, MA90-G189E, and SI06. Standard errors for each parameter, χ2, and R2 values are reported from global curve fitting using the bivalent analyte model. [file elife-83628-fig4-data1.xlsx]

## Sheet: Sheet1
			20 °C									25 °C								30 °C								35 °C								40 °C
Antibody ID	LC Mutation(s)	HC Mutation(s)	Antigen	ka (M-1 s-1)	ka error	kd (s-1)	kd error	KD (M)	KD error	Full χ2	Full R2	ka (M-1 s-1)	ka error	kd (s-1)	kd error	KD (M)	KD error	Full χ2	Full R2	ka (M-1 s-1)	ka error	kd (s-1)	kd error	KD (M)	KD error	Full χ2	Full R2	ka (M-1 s-1)	ka error	kd (s-1)	kd error	KD (M)	KD error	Full χ2	Full R2	ka (M-1 s-1)	ka error	kd (s-1)	kd error	KD (M)	KD error	Full χ2	Full R2
UCA	None	None	MA90	2204	46.97	6.147e-05	3.224e-06	2.789e-08	1.579e-09	0.0302	0.9987	4520	52.74	0.0001934	4.499e-06	4.279e-08	1.114e-09	0.0425	0.9991	11040	60.73	0.0003603	4.16e-06	3.264e-08	4.174e-10	0.0661	0.999	23110	151.6	0.0005289	6.289e-06	2.288e-08	3.107e-10	0.1352	0.9976	31110	169.6	0.0003195	3.459e-06	1.027e-08	1.245e-10	0.1907	0.9965
I-2	None	G31D, M34I, N52H	MA90	12790	190.5	<1.0E-07	2.098e-06	<1.0E-12	1.64e-10	0.0434	0.9988	28520	188.8	<1.0E-07	1.14e-06	<1.0E-12	3.999e-11	0.0517	0.9992	73250	180.6	4.011e-05	8.259e-07	5.475e-10	1.136e-11	0.0521	0.9992	76840	452.9	0.0001216	1.688e-06	1.583e-09	2.387e-11	0.1097	0.9978	86310	487.7	0.0001828	2.284e-06	2.118e-09	2.904e-11	0.1572	0.997
CH65	All	All	MA90	120000	418.7	3.985e-05	3.741e-06	3.319e-10	3.119e-11	0.0708	0.9933	180700	734.1	4.273e-06	1.711e-06	2.365e-11	9.47e-12	0.088	0.995	217200	655.1	0.0001006	3.67e-06	4.633e-10	1.696e-11	0.1149	0.9922	268600	890	0.0001789	4.18e-06	6.661e-10	1.572e-11	0.1153	0.9904	308100	1279	0.0002035	3.484e-06	6.604e-10	1.163e-11	0.1439	0.9906
	Y35N	None	MA90	29210	368.1	0.0001762	4.596e-06	6.032e-09	1.747e-10	0.095	0.9949	58880	520.9	0.0004131	5.56e-06	7.016e-09	1.13e-10	0.1751	0.9931	109200	704.2	0.0008536	6.887e-06	7.815e-09	8.072e-11	0.1688	0.9923	149200	1611	0.001705	1.783e-05	1.142e-08	1.717e-10	0.1856	0.9905	N.D.	N.D.	N.D.	N.D.	N.D.	N.D.	N.D.	N.D.
	None	N52H	MA90	19910	107.6	4.576e-05	1.133e-06	2.298e-09	5.824e-11	0.0128	0.9995	29890	162.1	7.107e-05	1.718e-06	2.377e-09	5.889e-11	0.0419	0.9989	60250	336.3	9.876e-05	1.507e-06	1.639e-09	2.663e-11	0.0637	0.9981	81660	582.3	0.0004079	3.378e-06	4.995e-09	5.459e-11	0.1221	0.9958	N.D.	N.D.	N.D.	N.D.	N.D.	N.D.	N.D.	N.D.
	Y48C, D49Y	N52H	MA90	68300	501.9	<1.0E-07	1.715e-06	<1.0E-12	2.512e-11	0.0519	0.9956	109200	596.6	<1.0E-07	1.333e-06	<1.0E-12	1.22e-11	0.0725	0.9958	162500	753.1	5.809e-05	1.233e-06	3.575e-10	7.766e-12	0.0717	0.9955	178900	926.9	0.0001548	2.675e-06	8.651e-10	1.561e-11	0.1415	0.9894	N.D.	N.D.	N.D.	N.D.	N.D.	N.D.	N.D.	N.D.
	Y48C, D49Y	H35N, N52H	MA90	123900	506.2	8.8e-06	1.734e-06	7.1e-11	1.4e-11	0.0349	0.9956	190200	730.3	<1.0E-07	1.497e-06	<1.0E-12	7.872e-12	0.0553	0.9949	261900	1076	3.503e-06	1.425e-06	1.338e-11	5.442e-12	0.0668	0.9946	287900	1224	0.0002029	2.528e-06	7.047e-10	9.28e-12	0.1034	0.9921	N.D.	N.D.	N.D.	N.D.	N.D.	N.D.	N.D.	N.D.
	Y35N	G31D, M34I, H35N, N52H	MA90	152500	899.9	2.958e-05	1.635e-06	1.94e-10	1.078e-11	0.0472	0.9941	239500	1387	7.234e-06	1.273e-06	3.021e-11	5.32e-12	0.0636	0.9941	270000	1937	<1.0E-07	3.662e-06	<1.0E-12	1.356e-11	0.2475	0.9794	302600	1311	0.0001317	3.181e-06	4.353e-10	1.068e-11	0.1076	0.9875	N.D.	N.D.	N.D.	N.D.	N.D.	N.D.	N.D.	N.D.
	None	G31D, M34I, H35N, N52H	MA90	45690	340.9	<1.0E-07	1.571e-06	<1.0E-12	3.438e-11	0.0475	0.9975	93890	389.6	7.487e-06	9.302e-07	7.975e-11	9.914e-12	0.041	0.9984	111200	388.3	0.0001137	2.312e-06	1.023e-09	2.111e-11	0.0927	0.9956	145200	588.4	0.0002781	3.137e-06	1.915e-09	2.295e-11	0.1174	0.9939	N.D.	N.D.	N.D.	N.D.	N.D.	N.D.	N.D.	N.D.
	Y35N	H35N	MA90	51890	308.2	8.675e-05	1.695e-06	1.672e-09	3.413e-11	0.0382	0.9978	99960	331.7	0.0001085	1.11e-06	1.086e-09	1.168e-11	0.0456	0.9982	94850	350.5	0.0004332	2.65e-06	4.567e-09	3.264e-11	0.087	0.9964	159800	1117	0.0005392	5.859e-06	3.375e-09	4.36e-11	0.2053	0.9897	N.D.	N.D.	N.D.	N.D.	N.D.	N.D.	N.D.	N.D.
	S29R, Y35N, Y48C, D49Y	Y33H, H35N, N52H, S84N	MA90	112400	605.8	<1.0E-07	1.67e-06	<1.0E-12	1.485e-11	0.0413	0.9951	167600	722.1	2.962e-05	1.968e-06	1.768e-10	1.177e-11	0.0619	0.9941	201000	904.6	<1.0E-07	2.257e-06	<1.0E-12	1.123e-11	0.0781	0.9914	305700	4400	9.845e-05	3.226e-06	3.22e-10	1.153e-11	0.128	0.9767	N.D.	N.D.	N.D.	N.D.	N.D.	N.D.	N.D.	N.D.
	S29R, Y48C, D49Y	Y33H, H35N, N52H, S84N	MA90	196100	920.2	<1.0E-07	2.174e-06	<1.0E-12	1.109e-11	0.059	0.991	295300	1233	1.241e-05	2.19e-06	4.204e-11	7.418e-12	0.0833	0.9897	385600	1714	9.539e-05	3.063e-06	2.474e-10	8.018e-12	0.0986	0.9839	522600	2648	0.0001109	2.187e-06	2.122e-10	4.321e-12	0.0602	0.9912	N.D.	N.D.	N.D.	N.D.	N.D.	N.D.	N.D.	N.D.
UCA	None	None	MA90-G189E	N.B.	N.B.	N.B.	N.B.	N.B.	N.B.	N.B.	N.B.	N.B.	N.B.	N.B.	N.B.	N.B.	N.B.	N.B.	N.B.	N.B.	N.B.	N.B.	N.B.	N.B.	N.B.	N.B.	N.B.	N.B.	N.B.	N.B.	N.B.	N.B.	N.B.	N.B.	N.B.	N.D.	N.D.	N.D.	N.D.	N.D.	N.D.	N.D.	N.D.
I-2	None	G31D, M34I, N52H	MA90-G189E	16900	222.9	0.0009647	3.142e-05	5.708e-08	2.006e-09	0.0576	0.9944	30570	269.5	0.0008674	1.422e-05	2.837e-08	5.28e-10	0.1191	0.9957	50740	528.8	0.001174	2.081e-05	2.314e-08	4.757e-10	0.1622	0.9945	74340	1223	0.002059	5.33e-05	2.769e-08	8.495e-10	0.2975	0.989	71220	2021	0.003562	0.0001595	5.001e-08	2.651e-09	0.3467	0.9843
CH65	All	All	MA90-G189E	62400	324.3	2.314e-05	1.291e-06	3.709e-10	2.078e-11	0.0339	0.9983	107400	578.5	0.0001081	1.556e-06	1.006e-09	1.546e-11	0.0789	0.9972	174900	1425	0.0002934	3.114e-06	1.677e-09	2.244e-11	0.2111	0.9909	231700	1502	0.0005351	4.229e-06	2.31e-09	2.361e-11	0.3024	0.9825	221400	1623	0.0003962	4.766e-06	1.79e-09	2.522e-11	0.4747	0.971
	Y35N	None	MA90-G189E	28560	799	0.003815	0.0001672	1.336e-07	6.943e-09	0.0463	0.9838	58180	2019	0.006084	0.0003207	1.046e-07	6.6e-09	0.1077	0.9809	108300	5098	0.008797	0.0005686	8.124e-08	6.497e-09	0.1058	0.9708	1909000	125900	0.03041	0.002661	1.593e-08	1.745e-09	0.0705	0.9702	N.D.	N.D.	N.D.	N.D.	N.D.	N.D.	N.D.	N.D.
	None	N52H	MA90-G189E	19900	637.9	0.003351	0.000159	1.684e-07	9.641e-09	0.0339	0.9844	31160	433.4	0.003445	5.288e-05	1.105e-07	2.289e-09	0.0635	0.9886	56940	2256	0.005843	0.0004046	1.026e-07	8.185e-09	0.108	0.9832	57700	4823	0.01055	0.001796	1.828e-07	3.466e-08	0.3399	0.9584	N.D.	N.D.	N.D.	N.D.	N.D.	N.D.	N.D.	N.D.
	Y48C, D49Y	N52H	MA90-G189E	75960	1159	0.001617	3.353e-05	2.128e-08	5.48e-10	0.1136	0.9865	98600	1340	0.001934	4.125e-05	1.962e-08	4.962e-10	0.2593	0.9806	112000	1853	0.002934	6.445e-05	2.62e-08	7.203e-10	0.3096	0.9766	119100	1138	0.003048	6.25e-05	2.56e-08	5.792e-10	0.2711	0.9779	N.D.	N.D.	N.D.	N.D.	N.D.	N.D.	N.D.	N.D.
	Y48C, D49Y	H35N, N52H	MA90-G189E	130500	928.7	0.0009705	6.152e-06	7.436e-09	7.086e-11	0.0904	0.9907	242600	2504	0.001588	1.744e-05	6.547e-09	9.866e-11	0.245	0.9823	207600	1797	0.004649	7.508e-05	2.239e-08	4.103e-10	0.2313	0.9832	253500	2391	0.00664	0.0001462	2.62e-08	6.276e-10	0.421	0.9737	N.D.	N.D.	N.D.	N.D.	N.D.	N.D.	N.D.	N.D.
	Y35N	G31D, M34I, H35N, N52H	MA90-G189E	180100	1069	0.001029	5.67e-06	5.717e-09	4.631e-11	0.0794	0.9924	166800	1161	0.005328	8.17e-05	3.193e-08	5.377e-10	0.1969	0.9869	230900	1979	0.006473	9.533e-05	2.803e-08	4.777e-10	0.2467	0.9793	252200	1929	0.008633	0.000156	3.423e-08	6.718e-10	0.1501	0.9887	N.D.	N.D.	N.D.	N.D.	N.D.	N.D.	N.D.	N.D.
	None	G31D, M34I, H35N, N52H	MA90-G189E	37930	450.9	0.001248	2.024e-05	3.29e-08	6.618e-10	0.0895	0.9937	73160	769.9	0.002336	3.95e-05	3.193e-08	6.359e-10	0.1984	0.9907	93650	906.5	0.003228	7.487e-05	3.447e-08	8.664e-10	0.1852	0.9905	116600	1001	0.003651	5.576e-05	3.131e-08	5.485e-10	0.1817	0.9899	N.D.	N.D.	N.D.	N.D.	N.D.	N.D.	N.D.	N.D.
	Y35N	H35N	MA90-G189E	41660	1118	0.002415	8.791e-05	5.796e-08	2.622e-09	0.0678	0.98	74380	1824	0.003098	0.0001206	4.165e-08	1.916e-09	0.171	0.979	114000	3579	0.0059	0.0002442	5.173e-08	2.687e-09	0.2042	0.9761	104100	6259	0.01654	0.002053	1.589e-07	2.192e-08	0.1368	0.979	N.D.	N.D.	N.D.	N.D.	N.D.	N.D.	N.D.	N.D.
	S29R, Y35N, Y48C, D49Y	Y33H, H35N, N52H, S84N	MA90-G189E	127400	893.3	0.0005383	3.716e-06	4.226e-09	4.159e-11	0.0872	0.9905	229100	1596	0.0008773	4.377e-06	3.829e-09	3.281e-11	0.1252	0.989	190300	1829	0.003736	5.778e-05	1.964e-08	3.576e-10	0.1862	0.9813	242500	2326	0.007682	0.0001659	3.168e-08	7.485e-10	0.1743	0.9797	N.D.	N.D.	N.D.	N.D.	N.D.	N.D.	N.D.	N.D.
	S29R, Y48C, D49Y	Y33H, H35N, N52H, S84N	MA90-G189E	434500	5617	0.0009196	6.766e-06	2.116e-09	3.148e-11	0.114	0.9618	590400	7306	0.001189	7.664e-06	2.013e-09	2.809e-11	0.1589	0.9725	1110000	24630	0.001807	1.832e-05	1.627e-09	3.968e-11	0.3363	0.9497	819400	24740	0.002274	4.943e-05	2.775e-09	1.032e-10	0.5393	0.9066	N.D.	N.D.	N.D.	N.D.	N.D.	N.D.	N.D.	N.D.
UCA	None	None	SI06	N.B.	N.B.	N.B.	N.B.	N.B.	N.B.	N.B.	N.B.	N.B.	N.B.	N.B.	N.B.	N.B.	N.B.	N.B.	N.B.	N.B.	N.B.	N.B.	N.B.	N.B.	N.B.	N.B.	N.B.	N.B.	N.B.	N.B.	N.B.	N.B.	N.B.	N.B.	N.B.	N.D.	N.D.	N.D.	N.D.	N.D.	N.D.	N.D.	N.D.
I-2	None	G31D, M34I, N52H	SI06	N.B.	N.B.	N.B.	N.B.	N.B.	N.B.	N.B.	N.B.	N.B.	N.B.	N.B.	N.B.	N.B.	N.B.	N.B.	N.B.	N.B.	N.B.	N.B.	N.B.	N.B.	N.B.	N.B.	N.B.	N.B.	N.B.	N.B.	N.B.	N.B.	N.B.	N.B.	N.B.	N.D.	N.D.	N.D.	N.D.	N.D.	N.D.	N.D.	N.D.
CH65	All	All	SI06	78020	754.8	0.005965	0.0001044	7.645e-08	1.529e-09	0.2348	0.9805	122000	1660	0.007096	0.0002875	5.815e-08	2.485e-09	0.2907	0.9843	174100	1944	0.007757	0.0002009	4.455e-08	1.257e-09	0.335	0.9814	227500	1232	0.009757	0.0002361	4.289e-08	1.063e-09	0.4604	0.9755	253300	4705	0.02903	0.001673	1.146e-07	6.94e-09	1.133	0.9583
	Y35N	None	SI06	N.B.	N.B.	N.B.	N.B.	N.B.	N.B.	N.B.	N.B.	N.B.	N.B.	N.B.	N.B.	N.B.	N.B.	N.B.	N.B.	N.B.	N.B.	N.B.	N.B.	N.B.	N.B.	N.B.	N.B.	N.B.	N.B.	N.B.	N.B.	N.B.	N.B.	N.B.	N.B.	N.D.	N.D.	N.D.	N.D.	N.D.	N.D.	N.D.	N.D.
	None	N52H	SI06	N.B.	N.B.	N.B.	N.B.	N.B.	N.B.	N.B.	N.B.	N.B.	N.B.	N.B.	N.B.	N.B.	N.B.	N.B.	N.B.	N.B.	N.B.	N.B.	N.B.	N.B.	N.B.	N.B.	N.B.	N.B.	N.B.	N.B.	N.B.	N.B.	N.B.	N.B.	N.B.	N.D.	N.D.	N.D.	N.D.	N.D.	N.D.	N.D.	N.D.
	Y48C, D49Y	N52H	SI06	31770	515.8	0.07777	0.001427	2.448e-06	5.999e-08	0.0198	0.9898	73410	2017	0.006136	0.0002945	8.359e-08	4.622e-09	0.1034	0.9738	161800	7553	0.009723	0.0005908	6.011e-08	4.606e-09	0.1436	0.97	519900	44090	0.01687	0.001834	3.245e-08	4.475e-09	0.3232	0.9533	N.D.	N.D.	N.D.	N.D.	N.D.	N.D.	N.D.	N.D.
	Y48C, D49Y	H35N, N52H	SI06	86100	2351	0.006352	0.000322	7.377e-08	4.248e-09	0.1499	0.9625	207900	5409	0.007156	0.000273	3.443e-08	1.59e-09	0.2744	0.9692	271600	7868	0.005272	0.0001756	1.941e-08	8.569e-10	0.3656	0.9673	274500	8576	0.006356	0.0002294	2.316e-08	1.106e-09	0.5216	0.9695	N.D.	N.D.	N.D.	N.D.	N.D.	N.D.	N.D.	N.D.
	Y35N	G31D, M34I, H35N, N52H	SI06	63110	1422	0.007316	0.0004189	1.159e-07	7.134e-09	0.1101	0.9732	88280	1993	0.009552	0.0005747	1.082e-07	6.953e-09	0.1778	0.9758	232000	9876	0.01376	0.0008742	5.931e-08	4.535e-09	0.2553	0.9672	166600	3087	0.03998	0.0008026	2.4e-07	6.558e-09	0.3018	0.9719	N.D.	N.D.	N.D.	N.D.	N.D.	N.D.	N.D.	N.D.
	None	G31D, M34I, H35N, N52H	SI06	19310	1895	0.06199	0.05577	3.21e-06	2.905e-06	0.1369	0.9122	66420	4396	0.02422	0.003658	3.647e-07	6.014e-08	0.1371	0.97	27620	1551	0.0302	0.002781	1.094e-06	1.18e-07	0.1758	0.9657	207.7	632.6	0.03696	0.001661	0.000178	0.0005422	0.3459	0.9516	N.D.	N.D.	N.D.	N.D.	N.D.	N.D.	N.D.	N.D.
	Y35N	H35N	SI06	N.B.	N.B.	N.B.	N.B.	N.B.	N.B.	N.B.	N.B.	N.B.	N.B.	N.B.	N.B.	N.B.	N.B.	N.B.	N.B.	N.B.	N.B.	N.B.	N.B.	N.B.	N.B.	N.B.	N.B.	N.B.	N.B.	N.B.	N.B.	N.B.	N.B.	N.B.	N.B.	N.D.	N.D.	N.D.	N.D.	N.D.	N.D.	N.D.	N.D.
	S29R, Y35N, Y48C, D49Y	Y33H, H35N, N52H, S84N	SI06	100300	2165	0.008419	0.0003935	8.391e-08	4.319e-09	0.0879	0.9786	141700	3149	0.007243	0.0002959	5.111e-08	2.377e-09	0.1767	0.9744	215000	6947	0.006575	0.0002806	3.058e-08	1.637e-09	0.2294	0.9618	101500	8115	0.03769	0.01078	3.713e-07	1.102e-07	0.3746	0.9587	N.D.	N.D.	N.D.	N.D.	N.D.	N.D.	N.D.	N.D.
	S29R, Y48C, D49Y	Y33H, H35N, N52H, S84N	SI06	314600	11050	0.01302	0.0007421	4.139e-08	2.771e-09	0.1878	0.9649	675400	19710	0.01493	0.0005302	2.21e-08	1.016e-09	0.3046	0.9714	585400	32060	0.01042	0.0005726	1.779e-08	1.381e-09	0.4145	0.961	1063000	121200	0.008	0.0007003	7.525e-09	1.082e-09	0.7673	0.9426	N.D.	N.D.	N.D.	N.D.	N.D.	N.D.	N.D.	N.D.
			*Some kd values for binding to MA90 are reported as <1.0E-7 espeically at lower temperatures. These values were directly taken from the curve fitting from the Sartorius software. These numbers are inaccurate and a much longer dissociation time would be necessary to accurately characterize those values.
			**Curve fit model used was the bivalent analyte model to account for the multi-valency of the HA trimers
			***Figure 4 shows values recorded at 30 °C
			****N.B. = non-binding in this assay
			*****N.D. = no data collected
