# Supplementary material for: Hierarchical sequence-affinity landscapes shape the evolution of breadth in an anti-influenza receptor binding site antibody
Source: eLife. 2023 Jan 10;12:e83628. doi: 10.7554/eLife.83628 (PMC9995116; doi:10.7554/eLife.83628)
Supplement: Figure 4—source data 2. [file elife-83628-fig4-data2.xlsx]

## Sheet: Sheet1
		UCA Y35N Fab (unbound)	I-2 Y35N H35N Fab (unbound)
	Data Collection
	Resolution (Å)	50 - (2.07 - 1.95)	50 - (2.86 - 2.70)
	Wavelength (Å)	0.97918	0.97918
	Space Group	C121	C121
	Unit cell dimensions (a, b, c) (Å)	124.547, 70.707, 86.934	127.724, 70.652, 75.759
	Unit cell angles (α, β, γ) (°)	90, 126.957, 90	90, 119.354, 90
	I/σ	17.23 (2.13)	7.39 (2.08)
	Rmeas (%)	5.2 (72.9)	23.3 (113.1)
	CC1/2 (%)	99.9 (80.0)	97.8 (78.4)
	Completeness (%)	98.3 (97.0)	96.4 (90.8)
	Number of observed reflections	167769 (26758)	87005 (13683)
	Number of unique reflectiions	43266 (6872)	15770 (2360)
	Redundancy	3.88 (3.89)	5.5 (5.8)
	Refinement
	Resolution (Å)	49.76 - 1.954 (2.024 - 1.954)	39.41 - 2.7 (2.797 - 2.7)
	Reflections used in refinement	43263 (4194)	15760 (1400)
	Reflections used for Rfree	2000 (194)	1580 (136)
	Rwork (%)	18.53 (28.49)	24.45 (37.27)
	Rfree (%)	21.59 (33.5)	28.32 (48.39)
	Ramachandran favored/allowed (%)	96.55 / 2.99	95.87 / 3.4
	Ramachandran outliers (%)	0.46	0.73
	Rmsd bond lengths (Å)	0.017	0.003
	Rmsd bond angles (°)	1.74	0.59
	Average B-factor	49.43	62.33
	PDB ID	8EK6	8EKH
