# Supplementary material for: Hierarchical sequence-affinity landscapes shape the evolution of breadth in an anti-influenza receptor binding site antibody
Source: eLife. 2023 Jan 10;12:e83628. doi: 10.7554/eLife.83628 (PMC9995116; doi:10.7554/eLife.83628)
Supplement: Supplementary file 3. [file elife-83628-supp3.xlsx]

## Sheet: Sheet1
Name	Sequence	Scale	Purification	Formulation
f1_N26D_S29R_Y35N_fwd	atcgacGGTCTCgCGGTAACgatATTGGAcggAAAAGTGTGCACTGGaatCAGCAGAAGC	25nm	STD	LabReady
f1_N26D_S29R_fwd	atcgacGGTCTCgCGGTAACgatATTGGAcggAAAAGTGTGCACTGGTACCAGCAG	25nm	STD	LabReady
f1_S29R_Y35N_fwd	atcgacGGTCTCgCGGTAACAACATTGGAcggAAAAGTGTGCACTGGaatCAGCAGAAGC	25nm	STD	LabReady
f1_N26D_Y35N_fwd	atcgacGGTCTCgCGGTAACgatATTGGAAGTAAAAGTGTGCACTGGaatCAGCAGAAGC	25nm	STD	LabReady
f1_N26D_fwd	atcgacGGTCTCgCGGTAACgatATTGGAAGTAAAAGTGTGCACTGG	25nm	STD	LabReady
f1_S29R_fwd	atcgacGGTCTCgCGGTAACAACATTGGAcggAAAAGTGTGCACTGGTAC	25nm	STD	LabReady
f1_Y35N_fwd	atcgacGGTCTCgCGGTAACAACATTGGAAGTAAAAGTGTGCACTGGaatCAGCAGAAGC	25nm	STD	LabReady
f1_fwd	atcgacGGTCTCgCGGTAACAACATTGGAAGTAAAAGTGTGCAC	25nm	STD	LabReady
f1_Y48C_D49Y_rev	atcgacGGTCTCcGCTATCgtagcaGACGACCAGCACAGGG	25nm	STD	LabReady
f1_Y48C_rev	atcgacGGTCTCcGCTATCATCgcaGACGACCAGCACAG	25nm	STD	LabReady
f1_D49Y_rev	atcgacGGTCTCcGCTATCgtaATAGACGACCAGCACAG	25nm	STD	LabReady
f1_rev	atcgacGGTCTCcGCTATCATCATAGACGACC	25nm	STD	LabReady
f2_R53R_fwd	atcgacGGTCTCaTAGCGACagaCCCTCAGGCATACCTG	25nm	STD	LabReady
f2_fwd	atcgacGGTCTCaTAGCGACCGGCCCTCAGG	25nm	STD	LabReady
f2_V98I_rev	atcgacGGTCTCcCCTCCGCCGAAgatCACATGATCAC	25nm	STD	LabReady
f2_rev	atcgacGGTCTCcCCTCCGCCGAATACCAC	25nm	STD	LabReady
f3_fwd	atcgacGGTCTCgGAGGGACCAAGCTGACC	25nm	STD	LabReady
f3_G31D_Y33H_M34I_H35N_rev	atcgacGGTCTCcGCACCCAattgatgtgGTAatcGGTGAAGGTGTATCCAG	25nm	STD	LabReady
f3_G31D_Y33H_M34I_rev	atcgacGGTCTCcGCACCCAGTGgatgtgGTAatcGGTGAAGGTGTATC	25nm	STD	LabReady
f3_G31D_Y33H_H35N_rev	atcgacGGTCTCcGCACCCAattCATgtgGTAatcGGTGAAGGTGTATCCAG	25nm	STD	LabReady
f3_G31D_M34I_H35N_rev	atcgacGGTCTCcGCACCCAattgatATAGTAatcGGTGAAGGTGTATCCAG	25nm	STD	LabReady
f3_Y33H_M34I_H35N_rev	atcgacGGTCTCcGCACCCAattgatgtgGTAGCCGGTGAAGGTG	25nm	STD	LabReady
f3_G31D_Y33H_rev	atcgacGGTCTCcGCACCCAGTGCATgtgGTAatcGGTGAAGGTG	25nm	STD	LabReady
f3_G31D_M34I_rev	atcgacGGTCTCcGCACCCAGTGgatATAGTAatcGGTGAAGGTG	25nm	STD	LabReady
f3_G31D_H35N_rev	atcgacGGTCTCcGCACCCAattCATATAGTAatcGGTGAAGGTGTATCCAG	25nm	STD	LabReady
f3_Y33H_M34I_rev	atcgacGGTCTCcGCACCCAGTGgatgtgGTAGCCGGTG	25nm	STD	LabReady
f3_Y33H_H35N_rev	atcgacGGTCTCcGCACCCAattCATgtgGTAGCCGGTG	25nm	STD	LabReady
f3_M34I_H35N_rev	atcgacGGTCTCcGCACCCAattgatATAGTAGCCGGTGAAGG	25nm	STD	LabReady
f3_G31D_rev	atcgacGGTCTCcGCACCCAGTGCATATAGTAatcGGTGAAGGTG	25nm	STD	LabReady
f3_Y33H_rev	atcgacGGTCTCcGCACCCAGTGCATgtgGTAGCCGGTG	25nm	STD	LabReady
f3_M34I_rev	atcgacGGTCTCcGCACCCAGTGgatATAGTAGC	25nm	STD	LabReady
f3_H35N_rev	atcgacGGTCTCcGCACCCAattCATATAGTAGCCGGTG	25nm	STD	LabReady
f3_rev	atcgacGGTCTCcGCACCCAGTGCATATAG	25nm	STD	LabReady
f4_fwd	atcgacGGTCTCgGTGCGACAGGCCCC	25nm	STD	LabReady
f4_N52H_G57D_rev	atcgacGGTCTCtAGTTTGTatcACCACTGTTAGGatgGATCCATCCCATCC	25nm	STD	LabReady
f4_N52H_rev	atcgacGGTCTCtAGTTTGTGCCACCACTGTTAGGatgGATCCATCCC	25nm	STD	LabReady
f4_G57D_rev	atcgacGGTCTCtAGTTTGTatcACCACTGTTAGGGTTGATCCATC	25nm	STD	LabReady
f4_rev	atcgacGGTCTCtAGTTTGTGCCACCACTG	25nm	STD	LabReady
f5_fwd	atcgacGGTCTCaAACTATGCACAGAAGTTTCAGGG	25nm	STD	LabReady
f5_L83V_S84N_R85G_R87K_rev	atcgacGGTCTCcATACACGGCCGTGTCGTCAGActtCAGtccattgacCTCCATGTAG	25nm	STD	LabReady
f5_L83V_S84N_R85G_rev	atcgacGGTCTCcATACACGGCCGTGTCGTCAGATCTCAGtccattgacCTCCATGTAG	25nm	STD	LabReady
f5_L83V_S84N_R87K_rev	atcgacGGTCTCcATACACGGCCGTGTCGTCAGActtCAGCCTattgacCTCCATGTAG	25nm	STD	LabReady
f5_L83V_R85G_R87K_rev	atcgacGGTCTCcATACACGGCCGTGTCGTCAGActtCAGtccGCTgacCTCCATGTAG	25nm	STD	LabReady
f5_S84N_R85G_R87K_rev	atcgacGGTCTCcATACACGGCCGTGTCGTCAGActtCAGtccattCAGCTCCATGTAG	25nm	STD	LabReady
f5_L83V_S84N_rev	atcgacGGTCTCcATACACGGCCGTGTCGTCAGATCTCAGCCTattgacCTCCATGTAG	25nm	STD	LabReady
f5_L83V_R85G_rev	atcgacGGTCTCcATACACGGCCGTGTCGTCAGATCTCAGtccGCTgacCTCCATGTAG	25nm	STD	LabReady
f5_L83V_R87K_rev	atcgacGGTCTCcATACACGGCCGTGTCGTCAGActtCAGCCTGCTgacCTCCATGTAG	25nm	STD	LabReady
f5_S84N_R85G_rev	atcgacGGTCTCcATACACGGCCGTGTCGTCAGATCTCAGtccattCAGCTCCATGTAG	25nm	STD	LabReady
f5_S84N_R87K_rev	atcgacGGTCTCcATACACGGCCGTGTCGTCAGActtCAGCCTattCAGCTCCATGTAG	25nm	STD	LabReady
f5_R85G_R87K_rev	atcgacGGTCTCcATACACGGCCGTGTCGTCAGActtCAGtccGCTCAGCTCC	25nm	STD	LabReady
f5_L83V_rev	atcgacGGTCTCcATACACGGCCGTGTCGTCAGATCTCAGCCTGCTgacCTCCATGTAG	25nm	STD	LabReady
f5_S84N_rev	atcgacGGTCTCcATACACGGCCGTGTCGTCAGATCTCAGCCTattCAGCTCCATGTAG	25nm	STD	LabReady
f5_R85G_rev	atcgacGGTCTCcATACACGGCCGTGTCGTCAGATCTCAGtccGCTCAGCTCCATGTAG	25nm	STD	LabReady
f5_R87K_rev	atcgacGGTCTCcATACACGGCCGTGTCGTCAGActtCAGCCTGCTC	25nm	STD	LabReady
f5_rev	atcgacGGTCTCcATACACGGCCGTGTCGTC	25nm	STD	LabReady
