# Supplementary material for: Hierarchical sequence-affinity landscapes shape the evolution of breadth in an anti-influenza receptor binding site antibody
Source: eLife. 2023 Jan 10;12:e83628. doi: 10.7554/eLife.83628 (PMC9995116; doi:10.7554/eLife.83628)
Supplement: Supplementary file 4. [file elife-83628-supp4.xlsx]

## Sheet: 20211018_idt
Name	Sequence	Scale	Purification
col_1_CH65F	TCGTCGGCAGCGTCAGATGTGTATAAGAGACAG(N:25252525)(N)(N)(N)(N)(N)(N)(N)TTGATCGCTGGCCAGACGGCTAG	100nm	STD
col_2_CH65F	TCGTCGGCAGCGTCAGATGTGTATAAGAGACAG(N:25252525)(N)(N)(N)(N)(N)(N)(N)CATTCTCGAGCTGGCCAGACGGCTAG	100nm	STD
col_3_CH65F	TCGTCGGCAGCGTCAGATGTGTATAAGAGACAG(N:25252525)(N)(N)(N)(N)(N)(N)(N)CCTTAGTACTACTGGCCAGACGGCTAG	100nm	STD
col_4_CH65F	TCGTCGGCAGCGTCAGATGTGTATAAGAGACAG(N:25252525)(N)(N)(N)(N)(N)(N)(N)AGTGGAATACCTCTGGCCAGACGGCTAG	100nm	STD
col_5_CH65F	TCGTCGGCAGCGTCAGATGTGTATAAGAGACAG(N:25252525)(N)(N)(N)(N)(N)(N)(N)GGTATCACTGGCCAGACGGCTAG	100nm	STD
col_6_CH65F	TCGTCGGCAGCGTCAGATGTGTATAAGAGACAG(N:25252525)(N)(N)(N)(N)(N)(N)(N)GATGTCCTCTGGCCAGACGGCTAG	100nm	STD
col_7_CH65F	TCGTCGGCAGCGTCAGATGTGTATAAGAGACAG(N:25252525)(N)(N)(N)(N)(N)(N)(N)CTCATCCAGCTGGCCAGACGGCTAG	100nm	STD
col_8_CH65F	TCGTCGGCAGCGTCAGATGTGTATAAGAGACAG(N:25252525)(N)(N)(N)(N)(N)(N)(N)GACGGAACTCCTGGCCAGACGGCTAG	100nm	STD
col_9_CH65F	TCGTCGGCAGCGTCAGATGTGTATAAGAGACAG(N:25252525)(N)(N)(N)(N)(N)(N)(N)ATCGCAGGCATCTGGCCAGACGGCTAG	100nm	STD
col_10_CH65F	TCGTCGGCAGCGTCAGATGTGTATAAGAGACAG(N:25252525)(N)(N)(N)(N)(N)(N)(N)TCACGACTAGTACTGGCCAGACGGCTAG	100nm	STD
row_1_CH65R	GTCTCGTGGGCTCGGAGATGTGTATAAGAGACAG(N:25252525)(N)(N)(N)(N)(N)(N)(N)TACCTGACCTCCACGGGCACAG	100nm	STD
row_2_CH65R	GTCTCGTGGGCTCGGAGATGTGTATAAGAGACAG(N:25252525)(N)(N)(N)(N)(N)(N)(N)AGAACCATCCTCCACGGGCACAG	100nm	STD
row_3_CH65R	GTCTCGTGGGCTCGGAGATGTGTATAAGAGACAG(N:25252525)(N)(N)(N)(N)(N)(N)(N)ACCGTTGACCCTCCACGGGCACAG	100nm	STD
row_4_CH65R	GTCTCGTGGGCTCGGAGATGTGTATAAGAGACAG(N:25252525)(N)(N)(N)(N)(N)(N)(N)GCAAGCTGTTCCTCCACGGGCACAG	100nm	STD
row_5_CH65R	GTCTCGTGGGCTCGGAGATGTGTATAAGAGACAG(N:25252525)(N)(N)(N)(N)(N)(N)(N)TCGGTGGTACGCCTCCACGGGCACAG	100nm	STD
row_6_CH65R	GTCTCGTGGGCTCGGAGATGTGTATAAGAGACAG(N:25252525)(N)(N)(N)(N)(N)(N)(N)GTTCAACCGATTCCTCCACGGGCACAG	100nm	STD
row_7_CH65R	GTCTCGTGGGCTCGGAGATGTGTATAAGAGACAG(N:25252525)(N)(N)(N)(N)(N)(N)(N)CGTACAACCTCCACGGGCACAG	100nm	STD
row_8_CH65R	GTCTCGTGGGCTCGGAGATGTGTATAAGAGACAG(N:25252525)(N)(N)(N)(N)(N)(N)(N)GAGATCACCCTCCACGGGCACAG	100nm	STD
